# Supplementary material for: Integrated bioinformatics analysis and biological experiments to identify key immune genes in vascular dementia
Source: Front Immunol. 2025 Mar 24;16:1560438. doi: 10.3389/fimmu.2025.1560438 (PMC11973090; doi:10.3389/fimmu.2025.1560438)
Supplement: Supplementary file 2 [file Table2.xlsx]

## Sheet: GPL23159-184565
#ID = Affymetrix transcript cluster id
#probeset_id =
#seqname =
#strand =
#start =
#stop =
#total_probes =
#category =
#SPOT_ID = locus type & mrna_assignment
#SPOT_ID =
ID	probeset_id	seqname	strand	start	stop	total_probes	category	SPOT_ID	SPOT_ID
TC0100006437.hg.1	TC0100006437.hg.1	chr1	+	69091	70008	10	main	Coding	NM_001005484 // RefSeq // Homo sapiens olfactory receptor, family 4, subfamily F, member 5 (OR4F5), mRNA. // chr1 // 100 // 100 // 0 // --- // 0 /// ENST00000335137 // ENSEMBL // olfactory receptor, family 4, subfamily F, member 5 [gene_biotype:protein_coding transcript_biotype:protein_coding] // chr1 // 100 // 100 // 0 // --- // 0 /// OTTHUMT00000003223 // Havana transcript // olfactory receptor…
TC0100006476.hg.1	TC0100006476.hg.1	chr1	+	924880	944581	10	main	Multiple_Complex	NM_152486 // RefSeq // Homo sapiens sterile alpha motif domain containing 11 (SAMD11), mRNA. // chr1 // 100 // 100 // 0 // --- // 0 /// ENST00000341065 // ENSEMBL // sterile alpha motif domain containing 11 [gene_biotype:protein_coding transcript_biotype:protein_coding] // chr1 // 100 // 100 // 0 // --- // 0 /// ENST00000342066 // ENSEMBL // sterile alpha motif domain containing 11 [gene_biotype:…
TC0100006479.hg.1	TC0100006479.hg.1	chr1	+	960587	965719	10	main	Multiple_Complex	NM_198317 // RefSeq // Homo sapiens kelch-like family member 17 (KLHL17), mRNA. // chr1 // 100 // 100 // 0 // --- // 0 /// ENST00000338591 // ENSEMBL // kelch-like family member 17 [gene_biotype:protein_coding transcript_biotype:protein_coding] // chr1 // 100 // 100 // 0 // --- // 0 /// ENST00000463212 // ENSEMBL // kelch-like family member 17 [gene_biotype:protein_coding transcript_biotype:retai…
TC0100006480.hg.1	TC0100006480.hg.1	chr1	+	966497	975865	10	main	Multiple_Complex	NM_001160184 // RefSeq // Homo sapiens pleckstrin homology domain containing, family N member 1 (PLEKHN1), transcript variant 2, mRNA. // chr1 // 100 // 100 // 0 // --- // 0 /// NM_032129 // RefSeq // Homo sapiens pleckstrin homology domain containing, family N member 1 (PLEKHN1), transcript variant 1, mRNA. // chr1 // 100 // 100 // 0 // --- // 0 /// ENST00000379407 // ENSEMBL // pleckstrin homol…
TC0100006483.hg.1	TC0100006483.hg.1	chr1	+	1001138	1014541	10	main	Multiple_Complex	NM_005101 // RefSeq // Homo sapiens ISG15 ubiquitin-like modifier (ISG15), mRNA. // chr1 // 100 // 100 // 0 // --- // 0 /// ENST00000379389 // ENSEMBL // ISG15 ubiquitin-like modifier [gene_biotype:protein_coding transcript_biotype:protein_coding] // chr1 // 100 // 100 // 0 // --- // 0 /// ENST00000624652 // ENSEMBL // ISG15 ubiquitin-like modifier [gene_biotype:protein_coding transcript_biotype:…
TC0100006486.hg.1	TC0100006486.hg.1	chr1	+	1020123	1056119	10	main	Multiple_Complex	NM_001305275 // RefSeq // Homo sapiens agrin (AGRN), transcript variant 1, mRNA. // chr1 // 100 // 100 // 0 // --- // 0 /// NM_198576 // RefSeq // Homo sapiens agrin (AGRN), transcript variant 2, mRNA. // chr1 // 100 // 100 // 0 // --- // 0 /// ENST00000379370 // ENSEMBL // agrin [gene_biotype:protein_coding transcript_biotype:protein_coding] // chr1 // 100 // 100 // 0 // --- // 0 /// ENST0000041…
TC0100006490.hg.1	TC0100006490.hg.1	chr1	+	1137017	1144056	10	main	NonCoding	NR_038869 // RefSeq // Homo sapiens long intergenic non-protein coding RNA 1342 (LINC01342), long non-coding RNA. // chr1 // 100 // 100 // 0 // --- // 0 /// ENST00000416774 // ENSEMBL // long intergenic non-protein coding RNA 1342 [gene_biotype:lincRNA transcript_biotype:lincRNA] // chr1 // 100 // 100 // 0 // --- // 0 /// ENST00000416774.1 // lncRNAWiki // long intergenic non-protein coding RNA 1…
TC0100006492.hg.1	TC0100006492.hg.1	chr1	+	1173884	1197935	10	main	Multiple_Complex	NM_001130045 // RefSeq // Homo sapiens tubulin tyrosine ligase-like family member 10 (TTLL10), transcript variant 1, mRNA. // chr1 // 100 // 100 // 0 // --- // 0 /// NM_153254 // RefSeq // Homo sapiens tubulin tyrosine ligase-like family member 10 (TTLL10), transcript variant 2, mRNA. // chr1 // 100 // 100 // 0 // --- // 0 /// ENST00000379288 // ENSEMBL // tubulin tyrosine ligase-like family memb…
TC0100006494.hg.1	TC0100006494.hg.1	chr1	+	1232249	1235041	10	main	Coding	NM_080605 // RefSeq // Homo sapiens UDP-Gal:betaGal beta 1,3-galactosyltransferase polypeptide 6 (B3GALT6), mRNA. // chr1 // 100 // 100 // 0 // --- // 0 /// ENST00000379198 // ENSEMBL // UDP-Gal:betaGal beta 1,3-galactosyltransferase polypeptide 6 [gene_biotype:protein_coding transcript_biotype:protein_coding] // chr1 // 100 // 100 // 0 // --- // 0 /// OTTHUMT00000005071 // Havana transcript // U…
TC0100006497.hg.1	TC0100006497.hg.1	chr1	+	1280436	1292029	10	main	Multiple_Complex	NM_001130413 // RefSeq // Homo sapiens sodium channel, non voltage gated 1 delta subunit (SCNN1D), transcript variant 1, mRNA. // chr1 // 100 // 100 // 0 // --- // 0 /// NR_037668 // RefSeq // Homo sapiens sodium channel, non voltage gated 1 delta subunit (SCNN1D), transcript variant 2, non-coding RNA. // chr1 // 100 // 100 // 0 // --- // 0 /// ENST00000325425 // ENSEMBL // sodium channel, non vo…
TC0100006499.hg.1	TC0100006499.hg.1	chr1	+	1308567	1311677	10	main	Multiple_Complex	NM_153339 // RefSeq // Homo sapiens pseudouridylate synthase-like 1 (PUSL1), mRNA. // chr1 // 100 // 100 // 0 // --- // 0 /// ENST00000379031 // ENSEMBL // pseudouridylate synthase-like 1 [gene_biotype:protein_coding transcript_biotype:protein_coding] // chr1 // 100 // 100 // 0 // --- // 0 /// ENST00000463758 // ENSEMBL // pseudouridylate synthase-like 1 [gene_biotype:protein_coding transcript_bi…
TC0100006501.hg.1	TC0100006501.hg.1	chr1	+	1324756	1328897	10	main	Multiple_Complex	NM_001029885 // RefSeq // Homo sapiens ceramide-1-phosphate transfer protein (CPTP), mRNA. // chr1 // 100 // 100 // 0 // --- // 0 /// ENST00000343938 // ENSEMBL // ceramide-1-phosphate transfer protein [gene_biotype:protein_coding transcript_biotype:protein_coding] // chr1 // 100 // 100 // 0 // --- // 0 /// ENST00000464957 // ENSEMBL // ceramide-1-phosphate transfer protein [gene_biotype:protein_…
TC0100006502.hg.1	TC0100006502.hg.1	chr1	+	1331314	1335306	10	main	Coding	NM_152228 // RefSeq // Homo sapiens taste receptor, type 1, member 3 (TAS1R3), mRNA. // chr1 // 100 // 100 // 0 // --- // 0 /// ENST00000339381 // ENSEMBL // taste receptor, type 1, member 3 [gene_biotype:protein_coding transcript_biotype:protein_coding] // chr1 // 100 // 100 // 0 // --- // 0 /// OTTHUMT00000008493 // Havana transcript // taste receptor, type 1, member 3[gene_biotype:protein_codi…
TC0100006514.hg.1	TC0100006514.hg.1	chr1	+	1426128	1427787	10	main	Multiple_Complex	NM_001146685 // RefSeq // Homo sapiens transmembrane protein 88B (TMEM88B), mRNA. // chr1 // 100 // 100 // 0 // --- // 0 /// ENST00000378821 // ENSEMBL // transmembrane protein 88B [gene_biotype:protein_coding transcript_biotype:protein_coding] // chr1 // 100 // 100 // 0 // --- // 0 /// OTTHUMT00000331012 // Havana transcript // transmembrane protein 88B[gene_biotype:protein_coding transcript_bio…
TC0100006516.hg.1	TC0100006516.hg.1	chr1	+	1434861	1442882	10	main	Coding	NM_022834 // RefSeq // Homo sapiens von Willebrand factor A domain containing 1 (VWA1), transcript variant 1, mRNA. // chr1 // 100 // 100 // 0 // --- // 0 /// NM_199121 // RefSeq // Homo sapiens von Willebrand factor A domain containing 1 (VWA1), transcript variant 2, mRNA. // chr1 // 100 // 100 // 0 // --- // 0 /// ENST00000338660 // ENSEMBL // von Willebrand factor A domain containing 1 [gene_b…
TC0100006517.hg.1	TC0100006517.hg.1	chr1	+	1449689	1470158	10	main	Multiple_Complex	NM_001039211 // RefSeq // Homo sapiens ATPase family, AAA domain containing 3C (ATAD3C), mRNA. // chr1 // 100 // 100 // 0 // --- // 0 /// ENST00000378785 // ENSEMBL // ATPase family, AAA domain containing 3C [gene_biotype:protein_coding transcript_biotype:protein_coding] // chr1 // 100 // 100 // 0 // --- // 0 /// ENST00000475091 // ENSEMBL // ATPase family, AAA domain containing 3C [gene_biotype:…
TC0100006524.hg.1	TC0100006524.hg.1	chr1	+	1615415	1630610	10	main	Multiple_Complex	NM_001170686 // RefSeq // Homo sapiens mindbomb E3 ubiquitin protein ligase 2 (MIB2), transcript variant 2, mRNA. // chr1 // 100 // 100 // 0 // --- // 0 /// NM_001170687 // RefSeq // Homo sapiens mindbomb E3 ubiquitin protein ligase 2 (MIB2), transcript variant 3, mRNA. // chr1 // 100 // 100 // 0 // --- // 0 /// NM_001170688 // RefSeq // Homo sapiens mindbomb E3 ubiquitin protein ligase 2 (MIB2),…
TC0100006540.hg.1	TC0100006540.hg.1	chr1	+	1914827	1917296	10	main	Multiple_Complex	NM_138705 // RefSeq // Homo sapiens calmodulin-like 6 (CALML6), mRNA. // chr1 // 100 // 100 // 0 // --- // 0 /// ENST00000307786 // ENSEMBL // calmodulin-like 6 [gene_biotype:protein_coding transcript_biotype:protein_coding] // chr1 // 100 // 100 // 0 // --- // 0 /// ENST00000378604 // ENSEMBL // calmodulin-like 6 [gene_biotype:protein_coding transcript_biotype:protein_coding] // chr1 // 100 // 1…
TC0100006548.hg.1	TC0100006548.hg.1	chr1	+	2019324	2030753	10	main	Coding	NM_000815 // RefSeq // Homo sapiens gamma-aminobutyric acid (GABA) A receptor, delta (GABRD), mRNA. // chr1 // 100 // 100 // 0 // --- // 0 /// ENST00000378585 // ENSEMBL // gamma-aminobutyric acid (GABA) A receptor, delta [gene_biotype:protein_coding transcript_biotype:protein_coding] // chr1 // 100 // 100 // 0 // --- // 0 /// BC033801 // GenBank // Homo sapiens gamma-aminobutyric acid (GABA) A r…
TC0100006550.hg.1	TC0100006550.hg.1	chr1	+	2050470	2185395	10	main	Multiple_Complex	NM_001033581 // RefSeq // Homo sapiens protein kinase C, zeta (PRKCZ), transcript variant 2, mRNA. // chr1 // 100 // 100 // 0 // --- // 0 /// NM_001033582 // RefSeq // Homo sapiens protein kinase C, zeta (PRKCZ), transcript variant 3, mRNA. // chr1 // 100 // 100 // 0 // --- // 0 /// NM_001242874 // RefSeq // Homo sapiens protein kinase C, zeta (PRKCZ), transcript variant 4, mRNA. // chr1 // 100 /…
TC0100006565.hg.1	TC0100006565.hg.1	chr1	+	2228695	2310213	10	main	Multiple_Complex	NM_003036 // RefSeq // Homo sapiens v-ski avian sarcoma viral oncogene homolog (SKI), mRNA. // chr1 // 100 // 100 // 0 // --- // 0 /// ENST00000378536 // ENSEMBL // SKI proto-oncogene [gene_biotype:protein_coding transcript_biotype:protein_coding] // chr1 // 100 // 100 // 0 // --- // 0 /// ENST00000478223 // ENSEMBL // SKI proto-oncogene [gene_biotype:protein_coding transcript_biotype:processed_t…
TC0100006571.hg.1	TC0100006571.hg.1	chr1	+	2293975	2295038	9	main	Multiple_Complex	hsa_circ_0000009 // circbase // Memczak2013 ALT_ACCEPTOR, ALT_DONOR, coding, INTERNAL, intronic best transcript NM_003036 // chr1 // 100 // 100 // 0 // --- // 0 /// kerlabu.aAug10-unspliced // Ace View // Transcript Identified by AceView // chr1 // 100 // 100 // 0 // --- // 0
TC0100006577.hg.1	TC0100006577.hg.1	chr1	+	2391775	2405446	10	main	Multiple_Complex	NM_007033 // RefSeq // Homo sapiens retention in endoplasmic reticulum sorting receptor 1 (RER1), mRNA. // chr1 // 100 // 100 // 0 // --- // 0 /// ENST00000306256 // ENSEMBL // retention in endoplasmic reticulum sorting receptor 1 [gene_biotype:protein_coding transcript_biotype:protein_coding] // chr1 // 100 // 100 // 0 // --- // 0 /// ENST00000378512 // ENSEMBL // retention in endoplasmic reticu…
TC0100006587.hg.1	TC0100006587.hg.1	chr1	+	2586460	2591469	10	main	Multiple_Complex	NM_001195736 // RefSeq // Homo sapiens family with sequence similarity 213, member B (FAM213B), transcript variant 1, mRNA. // chr1 // 100 // 100 // 0 // --- // 0 /// NM_001195737 // RefSeq // Homo sapiens family with sequence similarity 213, member B (FAM213B), transcript variant 3, mRNA. // chr1 // 100 // 100 // 0 // --- // 0 /// NM_001195738 // RefSeq // Homo sapiens family with sequence simil…
TC0100006602.hg.1	TC0100006602.hg.1	chr1	+	3021482	3022903	10	main	Coding	NM_080431 // RefSeq // Homo sapiens actin-related protein T2 (ACTRT2), mRNA. // chr1 // 100 // 100 // 0 // --- // 0 /// ENST00000378404 // ENSEMBL // actin-related protein T2 [gene_biotype:protein_coding transcript_biotype:protein_coding] // chr1 // 100 // 100 // 0 // --- // 0 /// BC029499 // GenBank // Homo sapiens actin-related protein T2, mRNA (cDNA clone MGC:33234 IMAGE:5270604), complete cds…
TC0100006604.hg.1	TC0100006604.hg.1	chr1	+	3069168	3438621	10	main	Multiple_Complex	NM_022114 // RefSeq // Homo sapiens PR domain containing 16 (PRDM16), transcript variant 1, mRNA. // chr1 // 100 // 100 // 0 // --- // 0 /// NM_199454 // RefSeq // Homo sapiens PR domain containing 16 (PRDM16), transcript variant 2, mRNA. // chr1 // 100 // 100 // 0 // --- // 0 /// ENST00000270722 // ENSEMBL // PR domain containing 16 [gene_biotype:protein_coding transcript_biotype:protein_coding]…
TC0100006613.hg.1	TC0100006613.hg.1	chr1	+	3454426	3481113	10	main	Multiple_Complex	NM_014448 // RefSeq // Homo sapiens Rho guanine nucleotide exchange factor (GEF) 16 (ARHGEF16), mRNA. // chr1 // 100 // 100 // 0 // --- // 0 /// ENST00000378371 // ENSEMBL // Rho guanine nucleotide exchange factor (GEF) 16 [gene_biotype:protein_coding transcript_biotype:protein_coding] // chr1 // 100 // 100 // 0 // --- // 0 /// ENST00000378373 // ENSEMBL // Rho guanine nucleotide exchange factor …
TC0100006619.hg.1	TC0100006619.hg.1	chr1	+	3624992	3630130	10	main	Multiple_Complex	NM_182752 // RefSeq // Homo sapiens tumor protein p63 regulated 1-like (TPRG1L), mRNA. // chr1 // 100 // 100 // 0 // --- // 0 /// ENST00000344579 // ENSEMBL // tumor protein p63 regulated 1-like [gene_biotype:protein_coding transcript_biotype:protein_coding] // chr1 // 100 // 100 // 0 // --- // 0 /// ENST00000378344 // ENSEMBL // tumor protein p63 regulated 1-like [gene_biotype:protein_coding tra…
TC0100006620.hg.1	TC0100006620.hg.1	chr1	+	3652520	3736201	10	main	Multiple_Complex	NM_001126240 // RefSeq // Homo sapiens tumor protein p73 (TP73), transcript variant 2, mRNA. // chr1 // 100 // 100 // 0 // --- // 0 /// NM_001126241 // RefSeq // Homo sapiens tumor protein p73 (TP73), transcript variant 3, mRNA. // chr1 // 100 // 100 // 0 // --- // 0 /// NM_001126242 // RefSeq // Homo sapiens tumor protein p73 (TP73), transcript variant 4, mRNA. // chr1 // 100 // 100 // 0 // --- …
TC0100006623.hg.1	TC0100006623.hg.1	chr1	+	3752398	3771645	10	main	Coding	NM_152492 // RefSeq // Homo sapiens coiled-coil domain containing 27 (CCDC27), mRNA. // chr1 // 100 // 100 // 0 // --- // 0 /// ENST00000294600 // ENSEMBL // coiled-coil domain containing 27 [gene_biotype:protein_coding transcript_biotype:protein_coding] // chr1 // 100 // 100 // 0 // --- // 0 /// ENST00000462521 // ENSEMBL // coiled-coil domain containing 27 [gene_biotype:protein_coding transcrip…
TC0100006624.hg.1	TC0100006624.hg.1	chr1	+	3772761	3775982	10	main	Multiple_Complex	NM_001163724 // RefSeq // Homo sapiens small integral membrane protein 1 (Vel blood group) (SMIM1), transcript variant 1, mRNA. // chr1 // 100 // 100 // 0 // --- // 0 /// NM_001288583 // RefSeq // Homo sapiens small integral membrane protein 1 (Vel blood group) (SMIM1), transcript variant 2, mRNA. // chr1 // 100 // 100 // 0 // --- // 0 /// ENST00000444870 // ENSEMBL // small integral membrane pro…
TC0100006627.hg.1	TC0100006627.hg.1	chr1	+	3857267	3885429	10	main	Multiple_Complex	NM_001282669 // RefSeq // Homo sapiens DNA fragmentation factor, 40kDa, beta polypeptide (caspase-activated DNase) (DFFB), transcript variant 1, mRNA. // chr1 // 100 // 100 // 0 // --- // 0 /// NM_004402 // RefSeq // Homo sapiens DNA fragmentation factor, 40kDa, beta polypeptide (caspase-activated DNase) (DFFB), transcript variant 2, mRNA. // chr1 // 100 // 100 // 0 // --- // 0 /// NR_104222 // R…
TC0100006650.hg.1	TC0100006650.hg.1	chr1	+	4654732	4792536	10	main	Multiple_Complex	NM_001042478 // RefSeq // Homo sapiens adherens junctions associated protein 1 (AJAP1), transcript variant 2, mRNA. // chr1 // 100 // 100 // 0 // --- // 0 /// NM_018836 // RefSeq // Homo sapiens adherens junctions associated protein 1 (AJAP1), transcript variant 1, mRNA. // chr1 // 100 // 100 // 0 // --- // 0 /// ENST00000378190 // ENSEMBL // adherens junctions associated protein 1 [gene_biotype:…
TC0100006675.hg.1	TC0100006675.hg.1	chr1	+	5991466	6101193	10	main	Multiple_Complex	NM_001199860 // RefSeq // Homo sapiens potassium channel, voltage gated subfamily A regulatory beta subunit 2 (KCNAB2), transcript variant 3, mRNA. // chr1 // 100 // 100 // 0 // --- // 0 /// NM_001199861 // RefSeq // Homo sapiens potassium channel, voltage gated subfamily A regulatory beta subunit 2 (KCNAB2), transcript variant 4, mRNA. // chr1 // 100 // 100 // 0 // --- // 0 /// NM_001199862 // R…
TC0100006681.hg.1	TC0100006681.hg.1	chr1	+	6205475	6221299	10	main	Multiple_Complex	NM_207396 // RefSeq // Homo sapiens ring finger protein 207 (RNF207), mRNA. // chr1 // 100 // 100 // 0 // --- // 0 /// ENST00000377939 // ENSEMBL // ring finger protein 207 [gene_biotype:protein_coding transcript_biotype:protein_coding] // chr1 // 100 // 100 // 0 // --- // 0 /// ENST00000463453 // ENSEMBL // ring finger protein 207 [gene_biotype:protein_coding transcript_biotype:processed_transcr…
TC0100006682.hg.1	TC0100006682.hg.1	chr1	+	6236240	6239451	10	main	Multiple_Complex	NR_103534 // RefSeq // Homo sapiens long intergenic non-protein coding RNA 337 (LINC00337), long non-coding RNA. // chr1 // 100 // 100 // 0 // --- // 0 /// BC030279 // GenBank // Homo sapiens chromosome 1 open reading frame 211, mRNA (cDNA clone MGC:40168 IMAGE:5141008), complete cds. // chr1 // 100 // 100 // 0 // --- // 0 /// ENST00000429480.2 // lncRNAWiki // long intergenic non-protein coding …
TC0100006683.hg.1	TC0100006683.hg.1	chr1	+	6244192	6245578	10	main	Coding	NM_001024598 // RefSeq // Homo sapiens hes family bHLH transcription factor 3 (HES3), mRNA. // chr1 // 100 // 100 // 0 // --- // 0 /// ENST00000377898 // ENSEMBL // hes family bHLH transcription factor 3 [gene_biotype:protein_coding transcript_biotype:protein_coding] // chr1 // 100 // 100 // 0 // --- // 0 /// OTTHUMT00000003716 // Havana transcript // hairy and enhancer of split 3 (Drosophila)[ge…
TC0100006689.hg.1	TC0100006689.hg.1	chr1	+	6424788	6461370	10	main	Multiple_Complex	NM_031475 // RefSeq // Homo sapiens espin (ESPN), mRNA. // chr1 // 100 // 100 // 0 // --- // 0 /// ENST00000377828 // ENSEMBL // espin [gene_biotype:protein_coding transcript_biotype:protein_coding] // chr1 // 100 // 100 // 0 // --- // 0 /// ENST00000416731 // ENSEMBL // espin [gene_biotype:protein_coding transcript_biotype:protein_coding] // chr1 // 100 // 100 // 0 // --- // 0 /// ENST0000041828…
TC0100006695.hg.1	TC0100006695.hg.1	chr1	+	6555181	6579757	10	main	Coding	NM_138697 // RefSeq // Homo sapiens taste receptor, type 1, member 1 (TAS1R1), transcript variant 2, mRNA. // chr1 // 100 // 100 // 0 // --- // 0 /// NM_177540 // RefSeq // Homo sapiens taste receptor, type 1, member 1 (TAS1R1), transcript variant 3, mRNA. // chr1 // 100 // 100 // 0 // --- // 0 /// ENST00000328191 // ENSEMBL // taste receptor, type 1, member 1 [gene_biotype:protein_coding transcr…
TC0100006696.hg.1	TC0100006696.hg.1	chr1	+	6579991	6589280	10	main	Multiple_Complex	NM_001278647 // RefSeq // Homo sapiens zinc finger and BTB domain containing 48 (ZBTB48), transcript variant 2, mRNA. // chr1 // 100 // 100 // 0 // --- // 0 /// NM_001278648 // RefSeq // Homo sapiens zinc finger and BTB domain containing 48 (ZBTB48), transcript variant 3, mRNA. // chr1 // 100 // 100 // 0 // --- // 0 /// NM_005341 // RefSeq // Homo sapiens zinc finger and BTB domain containing 48 …
TC0100006698.hg.1	TC0100006698.hg.1	chr1	+	6613685	6624033	10	main	Multiple_Complex	NM_153812 // RefSeq // Homo sapiens PHD finger protein 13 (PHF13), mRNA. // chr1 // 100 // 100 // 0 // --- // 0 /// ENST00000377648 // ENSEMBL // PHD finger protein 13 [gene_biotype:protein_coding transcript_biotype:protein_coding] // chr1 // 100 // 100 // 0 // --- // 0 /// ENST00000495385 // ENSEMBL // PHD finger protein 13 [gene_biotype:protein_coding transcript_biotype:processed_transcript] //…
TC0100006699.hg.1	TC0100006699.hg.1	chr1	+	6624865	6635586	10	main	Multiple_Complex	NM_001195752 // RefSeq // Homo sapiens THAP domain containing, apoptosis associated protein 3 (THAP3), transcript variant 1, mRNA. // chr1 // 100 // 100 // 0 // --- // 0 /// NM_001195753 // RefSeq // Homo sapiens THAP domain containing, apoptosis associated protein 3 (THAP3), transcript variant 3, mRNA. // chr1 // 100 // 100 // 0 // --- // 0 /// NM_138350 // RefSeq // Homo sapiens THAP domain con…
TC0100006707.hg.1	TC0100006707.hg.1	chr1	+	6785324	7769706	10	main	Multiple_Complex	NM_001195563 // RefSeq // Homo sapiens calmodulin binding transcription activator 1 (CAMTA1), transcript variant 2, mRNA. // chr1 // 100 // 100 // 0 // --- // 0 /// NM_001242701 // RefSeq // Homo sapiens calmodulin binding transcription activator 1 (CAMTA1), transcript variant 3, mRNA. // chr1 // 100 // 100 // 0 // --- // 0 /// NM_015215 // RefSeq // Homo sapiens calmodulin binding transcription …
TC0100006723.hg.1	TC0100006723.hg.1	chr1	+	7771269	7781432	10	main	Multiple_Complex	NM_004781 // RefSeq // Homo sapiens vesicle-associated membrane protein 3 (VAMP3), mRNA. // chr1 // 100 // 100 // 0 // --- // 0 /// ENST00000054666 // ENSEMBL // vesicle-associated membrane protein 3 [gene_biotype:protein_coding transcript_biotype:protein_coding] // chr1 // 100 // 100 // 0 // --- // 0 /// ENST00000470357 // ENSEMBL // vesicle-associated membrane protein 3 [gene_biotype:protein_co…
TC0100006725.hg.1	TC0100006725.hg.1	chr1	+	7784320	7845180	10	main	Multiple_Complex	NM_001289861 // RefSeq // Homo sapiens period circadian clock 3 (PER3), transcript variant 2, mRNA. // chr1 // 100 // 100 // 0 // --- // 0 /// NM_001289862 // RefSeq // Homo sapiens period circadian clock 3 (PER3), transcript variant 1, mRNA. // chr1 // 100 // 100 // 0 // --- // 0 /// NM_001289863 // RefSeq // Homo sapiens period circadian clock 3 (PER3), transcript variant 3, mRNA. // chr1 // 10…
TC0100006729.hg.1	TC0100006729.hg.1	chr1	+	7954291	7985505	10	main	Multiple_Complex	NM_001123377 // RefSeq // Homo sapiens parkinson protein 7 (PARK7), transcript variant 2, mRNA. // chr1 // 100 // 100 // 0 // --- // 0 /// NM_007262 // RefSeq // Homo sapiens parkinson protein 7 (PARK7), transcript variant 1, mRNA. // chr1 // 100 // 100 // 0 // --- // 0 /// ENST00000338639 // ENSEMBL // parkinson protein 7 [gene_biotype:protein_coding transcript_biotype:protein_coding] // chr1 //…
TC0100006739.hg.1	TC0100006739.hg.1	chr1	+	8317826	8344167	10	main	Multiple_Complex	NM_001080397 // RefSeq // Homo sapiens solute carrier family 45, member 1 (SLC45A1), mRNA. // chr1 // 100 // 100 // 0 // --- // 0 /// ENST00000289877 // ENSEMBL // solute carrier family 45, member 1 [gene_biotype:protein_coding transcript_biotype:protein_coding] // chr1 // 100 // 100 // 0 // --- // 0 /// ENST00000471889 // ENSEMBL // solute carrier family 45, member 1 [gene_biotype:protein_coding…
TC0100006755.hg.1	TC0100006755.hg.1	chr1	+	8861178	8861331	6	main	NonCoding	hsa_circ_0000013 // circbase // Memczak2013 ANTISENSE, coding, INTERNAL, UTR3 best transcript NM_001428 // chr1 // 100 // 100 // 0 // --- // 0
TC0100006761.hg.1	TC0100006761.hg.1	chr1	+	8945834	8975092	10	main	Multiple_Complex	NM_001215 // RefSeq // Homo sapiens carbonic anhydrase VI (CA6), transcript variant 1, mRNA. // chr1 // 100 // 100 // 0 // --- // 0 /// NM_001270500 // RefSeq // Homo sapiens carbonic anhydrase VI (CA6), transcript variant 2, mRNA. // chr1 // 100 // 100 // 0 // --- // 0 /// NM_001270501 // RefSeq // Homo sapiens carbonic anhydrase VI (CA6), transcript variant 3, mRNA. // chr1 // 100 // 100 // 0 /…
TC0100006771.hg.1	TC0100006771.hg.1	chr1	+	9234775	9271337	10	main	Multiple_Complex	NM_001282587 // RefSeq // Homo sapiens hexose-6-phosphate dehydrogenase (glucose 1-dehydrogenase) (H6PD), transcript variant 1, mRNA. // chr1 // 100 // 100 // 0 // --- // 0 /// NM_004285 // RefSeq // Homo sapiens hexose-6-phosphate dehydrogenase (glucose 1-dehydrogenase) (H6PD), transcript variant 2, mRNA. // chr1 // 100 // 100 // 0 // --- // 0 /// ENST00000377403 // ENSEMBL // hexose-6-phosphate…
TC0100006773.hg.1	TC0100006773.hg.1	chr1	+	9292880	9369532	10	main	Multiple_Complex	NM_025106 // RefSeq // Homo sapiens splA/ryanodine receptor domain and SOCS box containing 1 (SPSB1), mRNA. // chr1 // 100 // 100 // 0 // --- // 0 /// ENST00000328089 // ENSEMBL // splA/ryanodine receptor domain and SOCS box containing 1 [gene_biotype:protein_coding transcript_biotype:protein_coding] // chr1 // 100 // 100 // 0 // --- // 0 /// ENST00000357898 // ENSEMBL // splA/ryanodine receptor …
TC0100006781.hg.1	TC0100006781.hg.1	chr1	+	9539469	9585179	10	main	Multiple_Complex	NM_032315 // RefSeq // Homo sapiens solute carrier family 25 (pyrimidine nucleotide carrier), member 33 (SLC25A33), mRNA. // chr1 // 100 // 100 // 0 // --- // 0 /// ENST00000302692 // ENSEMBL // solute carrier family 25 (pyrimidine nucleotide carrier), member 33 [gene_biotype:protein_coding transcript_biotype:protein_coding] // chr1 // 100 // 100 // 0 // --- // 0 /// BC004991 // GenBank // Homo s…
TC0100006784.hg.1	TC0100006784.hg.1	chr1	+	9588874	9614877	10	main	Multiple_Complex	NM_001010866 // RefSeq // Homo sapiens transmembrane protein 201 (TMEM201), transcript variant 2, mRNA. // chr1 // 100 // 100 // 0 // --- // 0 /// NM_001130924 // RefSeq // Homo sapiens transmembrane protein 201 (TMEM201), transcript variant 1, mRNA. // chr1 // 100 // 100 // 0 // --- // 0 /// ENST00000340305 // ENSEMBL // transmembrane protein 201 [gene_biotype:protein_coding transcript_biotype:p…
TC0100006787.hg.1	TC0100006787.hg.1	chr1	+	9651732	9729114	10	main	Multiple_Complex	NM_005026 // RefSeq // Homo sapiens phosphatidylinositol-4,5-bisphosphate 3-kinase, catalytic subunit delta (PIK3CD), mRNA. // chr1 // 100 // 100 // 0 // --- // 0 /// ENST00000361110 // ENSEMBL // phosphatidylinositol-4,5-bisphosphate 3-kinase, catalytic subunit delta [gene_biotype:protein_coding transcript_biotype:protein_coding] // chr1 // 100 // 100 // 0 // --- // 0 /// ENST00000377346 // ENSE…
TC0100006801.hg.1	TC0100006801.hg.1	chr1	+	9942923	9985501	10	main	Multiple_Complex	NM_001297778 // RefSeq // Homo sapiens nicotinamide nucleotide adenylyltransferase 1 (NMNAT1), transcript variant 2, mRNA. // chr1 // 100 // 100 // 0 // --- // 0 /// NM_001297779 // RefSeq // Homo sapiens nicotinamide nucleotide adenylyltransferase 1 (NMNAT1), transcript variant 3, mRNA. // chr1 // 100 // 100 // 0 // --- // 0 /// NM_022787 // RefSeq // Homo sapiens nicotinamide nucleotide adenyly…
TC0100006805.hg.1	TC0100006805.hg.1	chr1	+	9997197	10016020	10	main	Multiple_Complex	NM_052960 // RefSeq // Homo sapiens retinol binding protein 7, cellular (RBP7), mRNA. // chr1 // 100 // 100 // 0 // --- // 0 /// ENST00000294435 // ENSEMBL // retinol binding protein 7, cellular [gene_biotype:protein_coding transcript_biotype:protein_coding] // chr1 // 100 // 100 // 0 // --- // 0 /// ENST00000315901 // ENSEMBL // retinol binding protein 7, cellular [gene_biotype:protein_coding tr…
TC0100006806.hg.1	TC0100006806.hg.1	chr1	+	10032832	10181239	10	main	Multiple_Complex	NM_001105562 // RefSeq // Homo sapiens ubiquitination factor E4B (UBE4B), transcript variant 1, mRNA. // chr1 // 100 // 100 // 0 // --- // 0 /// NM_006048 // RefSeq // Homo sapiens ubiquitination factor E4B (UBE4B), transcript variant 2, mRNA. // chr1 // 100 // 100 // 0 // --- // 0 /// ENST00000253251 // ENSEMBL // ubiquitination factor E4B [gene_biotype:protein_coding transcript_biotype:protein_…
TC0100006812.hg.1	TC0100006812.hg.1	chr1	+	10210706	10381603	10	main	Multiple_Complex	NM_015074 // RefSeq // Homo sapiens kinesin family member 1B (KIF1B), transcript variant 1, mRNA. // chr1 // 100 // 100 // 0 // --- // 0 /// NM_183416 // RefSeq // Homo sapiens kinesin family member 1B (KIF1B), transcript variant 2, mRNA. // chr1 // 100 // 100 // 0 // --- // 0 /// ENST00000263934 // ENSEMBL // kinesin family member 1B [gene_biotype:protein_coding transcript_biotype:protein_coding…
TC0100006818.hg.1	TC0100006818.hg.1	chr1	+	10398592	10420511	10	main	Multiple_Complex	NM_001304451 // RefSeq // Homo sapiens phosphogluconate dehydrogenase (PGD), transcript variant 2, mRNA. // chr1 // 100 // 100 // 0 // --- // 0 /// NM_001304452 // RefSeq // Homo sapiens phosphogluconate dehydrogenase (PGD), transcript variant 3, mRNA. // chr1 // 100 // 100 // 0 // --- // 0 /// NM_002631 // RefSeq // Homo sapiens phosphogluconate dehydrogenase (PGD), transcript variant 1, mRNA. /…
TC0100006819.hg.1	TC0100006819.hg.1	chr1	+	10430102	10452153	10	main	Multiple_Complex	NM_001243768 // RefSeq // Homo sapiens APITD1-CORT readthrough (APITD1-CORT), transcript variant 3, mRNA. // chr1 // 100 // 100 // 0 // --- // 0 /// NM_001270517 // RefSeq // Homo sapiens APITD1-CORT readthrough (APITD1-CORT), transcript variant 5, mRNA. // chr1 // 100 // 100 // 0 // --- // 0 /// NM_001302 // RefSeq // Homo sapiens cortistatin (CORT), mRNA. // chr1 // 100 // 100 // 0 // --- // 0 …
TC0100006822.hg.1	TC0100006822.hg.1	chr1	+	10472288	10630761	10	main	Multiple_Complex	NM_004565 // RefSeq // Homo sapiens peroxisomal biogenesis factor 14 (PEX14), mRNA. // chr1 // 100 // 100 // 0 // --- // 0 /// ENST00000356607 // ENSEMBL // peroxisomal biogenesis factor 14 [gene_biotype:protein_coding transcript_biotype:protein_coding] // chr1 // 100 // 100 // 0 // --- // 0 /// ENST00000472851 // ENSEMBL // peroxisomal biogenesis factor 14 [gene_biotype:protein_coding transcript…
TC0100006840.hg.1	TC0100006840.hg.1	chr1	+	11012344	11030528	10	main	Multiple_Complex	NM_007375 // RefSeq // Homo sapiens TAR DNA binding protein (TARDBP), mRNA. // chr1 // 100 // 100 // 0 // --- // 0 /// ENST00000240185 // ENSEMBL // TAR DNA binding protein [gene_biotype:protein_coding transcript_biotype:protein_coding] // chr1 // 100 // 100 // 0 // --- // 0 /// ENST00000315091 // ENSEMBL // TAR DNA binding protein [gene_biotype:protein_coding transcript_biotype:protein_coding] /…
TC0100006849.hg.1	TC0100006849.hg.1	chr1	+	11189289	11195981	10	main	Multiple_Complex	NM_021146 // RefSeq // Homo sapiens angiopoietin-like 7 (ANGPTL7), mRNA. // chr1 // 100 // 100 // 0 // --- // 0 /// ENST00000376819 // ENSEMBL // angiopoietin-like 7 [gene_biotype:protein_coding transcript_biotype:protein_coding] // chr1 // 100 // 100 // 0 // --- // 0 /// ENST00000476934 // ENSEMBL // angiopoietin-like 7 [gene_biotype:protein_coding transcript_biotype:processed_transcript] // chr…
TC0100006852.hg.1	TC0100006852.hg.1	chr1	+	11273198	11296049	10	main	Multiple_Complex	NM_013319 // RefSeq // Homo sapiens UbiA prenyltransferase domain containing 1 (UBIAD1), mRNA. // chr1 // 100 // 100 // 0 // --- // 0 /// ENST00000376804 // ENSEMBL // UbiA prenyltransferase domain containing 1 [gene_biotype:protein_coding transcript_biotype:protein_coding] // chr1 // 100 // 100 // 0 // --- // 0 /// ENST00000376810 // ENSEMBL // UbiA prenyltransferase domain containing 1 [gene_bi…
TC0100006857.hg.1	TC0100006857.hg.1	chr1	+	11479166	11537584	10	main	Multiple_Complex	NM_020780 // RefSeq // Homo sapiens patched domain containing 2 (PTCHD2), mRNA. // chr1 // 100 // 100 // 0 // --- // 0 /// ENST00000294484 // ENSEMBL // patched domain containing 2 [gene_biotype:protein_coding transcript_biotype:protein_coding] // chr1 // 100 // 100 // 0 // --- // 0 /// ENST00000304391 // ENSEMBL // patched domain containing 2 [gene_biotype:protein_coding transcript_biotype:prote…
TC0100006861.hg.1	TC0100006861.hg.1	chr1	+	11654375	11663327	10	main	Multiple_Complex	NM_001014765 // RefSeq // Homo sapiens F-box protein 44 (FBXO44), transcript variant 4, mRNA. // chr1 // 100 // 100 // 0 // --- // 0 /// NM_001304790 // RefSeq // Homo sapiens F-box protein 44 (FBXO44), transcript variant 5, mRNA. // chr1 // 100 // 100 // 0 // --- // 0 /// NM_001304791 // RefSeq // Homo sapiens F-box protein 44 (FBXO44), transcript variant 6, mRNA. // chr1 // 100 // 100 // 0 // -…
TC0100006862.hg.1	TC0100006862.hg.1	chr1	+	11664093	11674354	10	main	Multiple_Complex	NM_018438 // RefSeq // Homo sapiens F-box protein 6 (FBXO6), mRNA. // chr1 // 100 // 100 // 0 // --- // 0 /// ENST00000376753 // ENSEMBL // F-box protein 6 [gene_biotype:protein_coding transcript_biotype:protein_coding] // chr1 // 100 // 100 // 0 // --- // 0 /// ENST00000449067 // ENSEMBL // F-box protein 6 [gene_biotype:protein_coding transcript_biotype:protein_coding] // chr1 // 100 // 100 // 0…
TC0100006864.hg.1	TC0100006864.hg.1	chr1	+	11691722	11725857	10	main	Multiple_Complex	NM_198545 // RefSeq // Homo sapiens dorsal inhibitory axon guidance protein (DRAXIN), mRNA. // chr1 // 100 // 100 // 0 // --- // 0 /// ENST00000294485 // ENSEMBL // dorsal inhibitory axon guidance protein [gene_biotype:protein_coding transcript_biotype:protein_coding] // chr1 // 100 // 100 // 0 // --- // 0 /// BC111064 // GenBank // Homo sapiens chromosome 1 open reading frame 187, mRNA (cDNA clo…
TC0100006865.hg.1	TC0100006865.hg.1	chr1	+	11736084	11754802	10	main	Multiple_Complex	NM_001040194 // RefSeq // Homo sapiens angiotensin II receptor-associated protein (AGTRAP), transcript variant 2, mRNA. // chr1 // 100 // 100 // 0 // --- // 0 /// NM_001040195 // RefSeq // Homo sapiens angiotensin II receptor-associated protein (AGTRAP), transcript variant 3, mRNA. // chr1 // 100 // 100 // 0 // --- // 0 /// NM_001040196 // RefSeq // Homo sapiens angiotensin II receptor-associated…
TC0100006866.hg.1	TC0100006866.hg.1	chr1	+	11761787	11789585	10	main	Multiple_Complex	NM_001010881 // RefSeq // Homo sapiens chromosome 1 open reading frame 167 (C1orf167), mRNA. // chr1 // 100 // 100 // 0 // --- // 0 /// OTTHUMT00000006326 // Havana transcript // chromosome 1 open reading frame 167[gene_biotype:protein_coding transcript_biotype:processed_transcript] // chr1 // 100 // 100 // 0 // --- // 0 /// OTTHUMT00000006327 // Havana transcript // chromosome 1 open reading fra…
TC0100006874.hg.1	TC0100006874.hg.1	chr1	+	11934205	11975542	10	main	Multiple_Complex	NM_000302 // RefSeq // Homo sapiens procollagen-lysine, 2-oxoglutarate 5-dioxygenase 1 (PLOD1), transcript variant 2, mRNA. // chr1 // 100 // 100 // 0 // --- // 0 /// ENST00000196061 // ENSEMBL // procollagen-lysine, 2-oxoglutarate 5-dioxygenase 1 [gene_biotype:protein_coding transcript_biotype:protein_coding] // chr1 // 100 // 100 // 0 // --- // 0 /// ENST00000358133 // ENSEMBL // procollagen-ly…
TC0100006875.hg.1	TC0100006875.hg.1	chr1	+	11980181	12013515	10	main	Multiple_Complex	NM_001127660 // RefSeq // Homo sapiens mitofusin 2 (MFN2), transcript variant 2, mRNA. // chr1 // 100 // 100 // 0 // --- // 0 /// NM_014874 // RefSeq // Homo sapiens mitofusin 2 (MFN2), transcript variant 1, mRNA. // chr1 // 100 // 100 // 0 // --- // 0 /// ENST00000235329 // ENSEMBL // mitofusin 2 [gene_biotype:protein_coding transcript_biotype:protein_coding] // chr1 // 100 // 100 // 0 // --- //…
TC0100006876.hg.1	TC0100006876.hg.1	chr1	+	12019242	12032049	10	main	Multiple_Complex	NM_021933 // RefSeq // Homo sapiens migration and invasion inhibitory protein (MIIP), mRNA. // chr1 // 100 // 100 // 0 // --- // 0 /// ENST00000235332 // ENSEMBL // migration and invasion inhibitory protein [gene_biotype:protein_coding transcript_biotype:protein_coding] // chr1 // 100 // 100 // 0 // --- // 0 /// ENST00000460823 // ENSEMBL // migration and invasion inhibitory protein [gene_biotype…
TC0100006877.hg.1	TC0100006877.hg.1	chr1	+	12023790	12024159	6	main	Unassigned	MIIP.lAug10-unspliced // Ace View // Transcript Identified by AceView, Entrez Gene ID(s) 60672 // chr1 // 100 // 100 // 0 // --- // 0
TC0100006880.hg.1	TC0100006880.hg.1	chr1	+	12063377	12144207	10	main	Multiple_Complex	NM_001243 // RefSeq // Homo sapiens tumor necrosis factor receptor superfamily, member 8 (TNFRSF8), transcript variant 1, mRNA. // chr1 // 100 // 100 // 0 // --- // 0 /// NM_001281430 // RefSeq // Homo sapiens tumor necrosis factor receptor superfamily, member 8 (TNFRSF8), transcript variant 3, mRNA. // chr1 // 100 // 100 // 0 // --- // 0 /// ENST00000263932 // ENSEMBL // tumor necrosis factor re…
TC0100006881.hg.1	TC0100006881.hg.1	chr1	+	12166943	12209228	10	main	Multiple_Complex	NM_001066 // RefSeq // Homo sapiens tumor necrosis factor receptor superfamily, member 1B (TNFRSF1B), mRNA. // chr1 // 100 // 100 // 0 // --- // 0 /// NR_039775 // RefSeq // Homo sapiens microRNA 4632 (MIR4632), microRNA. // chr1 // 100 // 100 // 0 // --- // 0 /// NR_107000 // RefSeq // Homo sapiens microRNA 7846 (MIR7846), microRNA. // chr1 // 100 // 100 // 0 // --- // 0 /// ENST00000376259 // E…
TC0100006884.hg.1	TC0100006884.hg.1	chr1	+	12230039	12512047	10	main	Multiple_Complex	NM_015378 // RefSeq // Homo sapiens vacuolar protein sorting 13 homolog D (S. cerevisiae) (VPS13D), transcript variant 1, mRNA. // chr1 // 100 // 100 // 0 // --- // 0 /// NM_018156 // RefSeq // Homo sapiens vacuolar protein sorting 13 homolog D (S. cerevisiae) (VPS13D), transcript variant 2, mRNA. // chr1 // 100 // 100 // 0 // --- // 0 /// ENST00000011700 // ENSEMBL // vacuolar protein sorting 13…
TC0100006900.hg.1	TC0100006900.hg.1	chr1	+	12644547	12667086	10	main	Coding	NM_001013630 // RefSeq // Homo sapiens arylacetamide deacetylase-like 4 (AADACL4), mRNA. // chr1 // 100 // 100 // 0 // --- // 0 /// ENST00000376221 // ENSEMBL // arylacetamide deacetylase-like 4 [gene_biotype:protein_coding transcript_biotype:protein_coding] // chr1 // 100 // 100 // 0 // --- // 0 /// OTTHUMT00000005328 // Havana transcript // arylacetamide deacetylase-like 4[gene_biotype:protein_…
TC0100006903.hg.1	TC0100006903.hg.1	chr1	+	12716115	12728759	10	main	Multiple_Complex	NM_001103170 // RefSeq // Homo sapiens arylacetamide deacetylase-like 3 (AADACL3), transcript variant 1, mRNA. // chr1 // 100 // 100 // 0 // --- // 0 /// NR_111984 // RefSeq // Homo sapiens arylacetamide deacetylase-like 3 (AADACL3), transcript variant 2, non-coding RNA. // chr1 // 100 // 100 // 0 // --- // 0 /// ENST00000359318 // ENSEMBL // arylacetamide deacetylase-like 3 [gene_biotype:protein…
TC0100006905.hg.1	TC0100006905.hg.1	chr1	+	12746186	12763699	10	main	Multiple_Complex	NM_152290 // RefSeq // Homo sapiens chromosome 1 open reading frame 158 (C1orf158), mRNA. // chr1 // 100 // 100 // 0 // --- // 0 /// ENST00000376210 // ENSEMBL // chromosome 1 open reading frame 158 [gene_biotype:protein_coding transcript_biotype:protein_coding] // chr1 // 100 // 100 // 0 // --- // 0 /// ENST00000474179 // ENSEMBL // chromosome 1 open reading frame 158 [gene_biotype:protein_codin…
TC0100006906.hg.1	TC0100006906.hg.1	chr1	+	12756790	12757297	6	main	Unassigned	C1orf158.eAug10-unspliced // Ace View // Transcript Identified by AceView, Entrez Gene ID(s) 93190 // chr1 // 100 // 100 // 0 // --- // 0
TC0100006907.hg.1	TC0100006907.hg.1	chr1	+	12774841	12777906	10	main	Coding	NM_001080830 // RefSeq // Homo sapiens PRAME family member 12 (PRAMEF12), mRNA. // chr1 // 100 // 100 // 0 // --- // 0 /// ENST00000357726 // ENSEMBL // PRAME family member 12 [gene_biotype:protein_coding transcript_biotype:protein_coding] // chr1 // 100 // 100 // 0 // --- // 0 /// OTTHUMT00000005457 // Havana transcript // PRAME family member 12[gene_biotype:protein_coding transcript_biotype:pro…
TC0100006908.hg.1	TC0100006908.hg.1	chr1	+	12791397	12796628	10	main	Multiple_Complex	NM_001294139 // RefSeq // Homo sapiens PRAME family member 1 (PRAMEF1), transcript variant 2, mRNA. // chr1 // 100 // 100 // 0 // --- // 0 /// NM_023013 // RefSeq // Homo sapiens PRAME family member 1 (PRAMEF1), transcript variant 1, mRNA. // chr1 // 100 // 100 // 0 // --- // 0 /// BC144199 // GenBank // Homo sapiens PRAME family member 1, mRNA (cDNA clone MGC:177736 IMAGE:9052719), complete cds.…
TC0100006910.hg.1	TC0100006910.hg.1	chr1	+	12857086	12861909	10	main	Coding	NM_023014 // RefSeq // Homo sapiens PRAME family member 2 (PRAMEF2), mRNA. // chr1 // 100 // 100 // 0 // --- // 0 /// ENST00000240189 // ENSEMBL // PRAME family member 2 [gene_biotype:protein_coding transcript_biotype:protein_coding] // chr1 // 100 // 100 // 0 // --- // 0 /// BC075008 // GenBank // Homo sapiens PRAME family member 2, mRNA (cDNA clone MGC:104155 IMAGE:30915615), complete cds. // c…
TC0100006912.hg.1	TC0100006912.hg.1	chr1	+	12916610	12920482	10	main	Coding	NM_001012277 // RefSeq // Homo sapiens PRAME family member 7 (PRAMEF7), mRNA. // chr1 // 100 // 100 // 0 // --- // 0 /// ENST00000330881 // ENSEMBL // PRAME family member 7 [gene_biotype:protein_coding transcript_biotype:protein_coding] // chr1 // 100 // 100 // 0 // --- // 0 /// ENST00000616979 // ENSEMBL // PRAME family member 7 [gene_biotype:protein_coding transcript_biotype:protein_coding] // …
TC0100006920.hg.1	TC0100006920.hg.1	chr1	+	13172455	13179464	10	main	Coding	ENST00000415919 // ENSEMBL // PRAME family member 25 [gene_biotype:protein_coding transcript_biotype:protein_coding] // chr1 // 100 // 100 // 0 // --- // 0 /// NM_001010890_2 // RefSeq // Homo sapiens PRAME family member 9 (PRAMEF9), mRNA. // chr1 // 100 // 100 // 0 // --- // 0 /// NM_001300891_2 // RefSeq // Homo sapiens PRAME family member 9/15-like (LOC101929983), mRNA. // chr1 // 100 // 100 /…
TC0100006922.hg.1	TC0100006922.hg.1	chr1	+	13254198	13263435	10	main	Coding	ENST00000622421 // ENSEMBL // PRAME family member 5 [gene_biotype:protein_coding transcript_biotype:protein_coding] // chr1 // 100 // 100 // 0 // --- // 0 /// OTTHUMT00000468934 // Havana transcript // PRAME family member 5[gene_biotype:protein_coding transcript_biotype:protein_coding] // chr1 // 100 // 100 // 0 // --- // 0 /// uc001auu.1 // UCSC Genes // Homo sapiens PRAME family member 5 (PRAME…
TC0100006925.hg.1	TC0100006925.hg.1	chr1	+	13389628	13392631	10	main	Coding	NM_001045480 // RefSeq // Homo sapiens PRAME family member 16 (PRAMEF16), mRNA. // chr1 // 100 // 100 // 0 // --- // 0 /// NM_001099851 // RefSeq // Homo sapiens PRAME family member 17 (PRAMEF17), mRNA. // chr1 // 100 // 100 // 0 // --- // 0 /// BC144662 // GenBank // Homo sapiens PRAME family member 16, mRNA (cDNA clone MGC:178210 IMAGE:9053193), complete cds. // chr1 // 100 // 100 // 0 // --- /…
TC0100006926.hg.1	TC0100006926.hg.1	chr1	+	13410450	13421328	10	main	Coding	NM_001099852 // RefSeq // Homo sapiens PRAME family member 20 (PRAMEF20), mRNA. // chr1 // 100 // 100 // 0 // --- // 0 /// ENST00000316412 // ENSEMBL // PRAME family member 20 [gene_biotype:protein_coding transcript_biotype:protein_coding] // chr1 // 100 // 100 // 0 // --- // 0 /// ENST00000602960 // ENSEMBL // PRAME family member 20 [gene_biotype:protein_coding transcript_biotype:protein_coding]…
TC0100006931.hg.1	TC0100006931.hg.1	chr1	+	13583465	13617957	10	main	Multiple_Complex	NM_001006624 // RefSeq // Homo sapiens podoplanin (PDPN), transcript variant 3, mRNA. // chr1 // 100 // 100 // 0 // --- // 0 /// NM_001006625 // RefSeq // Homo sapiens podoplanin (PDPN), transcript variant 4, mRNA. // chr1 // 100 // 100 // 0 // --- // 0 /// NM_006474 // RefSeq // Homo sapiens podoplanin (PDPN), transcript variant 1, mRNA. // chr1 // 100 // 100 // 0 // --- // 0 /// NM_198389 // Re…
TC0100006937.hg.1	TC0100006937.hg.1	chr1	+	13700198	13825079	10	main	Multiple_Complex	NM_001007257 // RefSeq // Homo sapiens PR domain containing 2, with ZNF domain (PRDM2), transcript variant 3, mRNA. // chr1 // 100 // 100 // 0 // --- // 0 /// NM_001135610 // RefSeq // Homo sapiens PR domain containing 2, with ZNF domain (PRDM2), transcript variant 4, mRNA. // chr1 // 100 // 100 // 0 // --- // 0 /// NM_012231 // RefSeq // Homo sapiens PR domain containing 2, with ZNF domain (PRDM…
TC0100006954.hg.1	TC0100006954.hg.1	chr1	+	14598704	15118048	10	main	Multiple_Complex	NM_001017999 // RefSeq // Homo sapiens kazrin, periplakin interacting protein (KAZN), transcript variant D, mRNA. // chr1 // 100 // 100 // 0 // --- // 0 /// NM_001018000 // RefSeq // Homo sapiens kazrin, periplakin interacting protein (KAZN), transcript variant B, mRNA. // chr1 // 100 // 100 // 0 // --- // 0 /// NM_001018001 // RefSeq // Homo sapiens kazrin, periplakin interacting protein (KAZN),…
TC0100006977.hg.1	TC0100006977.hg.1	chr1	+	15152532	15220480	10	main	Coding	NM_001136216 // RefSeq // Homo sapiens transmembrane protein 51 (TMEM51), transcript variant 1, mRNA. // chr1 // 100 // 100 // 0 // --- // 0 /// NM_001136217 // RefSeq // Homo sapiens transmembrane protein 51 (TMEM51), transcript variant 2, mRNA. // chr1 // 100 // 100 // 0 // --- // 0 /// NM_001136218 // RefSeq // Homo sapiens transmembrane protein 51 (TMEM51), transcript variant 3, mRNA. // chr1…
TC0100006982.hg.1	TC0100006982.hg.1	chr1	+	15409895	15430343	10	main	Coding	NM_024329 // RefSeq // Homo sapiens EF-hand domain family, member D2 (EFHD2), mRNA. // chr1 // 100 // 100 // 0 // --- // 0 /// ENST00000375980 // ENSEMBL // EF-hand domain family, member D2 [gene_biotype:protein_coding transcript_biotype:protein_coding] // chr1 // 100 // 100 // 0 // --- // 0 /// ENST00000445566 // ENSEMBL // EF-hand domain family, member D2 [gene_biotype:protein_coding transcript…
TC0100006983.hg.1	TC0100006983.hg.1	chr1	+	15438439	15449242	10	main	Multiple_Complex	NM_007272 // RefSeq // Homo sapiens chymotrypsin C (caldecrin) (CTRC), mRNA. // chr1 // 100 // 100 // 0 // --- // 0 /// ENST00000375943 // ENSEMBL // chymotrypsin C (caldecrin) [gene_biotype:protein_coding transcript_biotype:protein_coding] // chr1 // 100 // 100 // 0 // --- // 0 /// ENST00000375949 // ENSEMBL // chymotrypsin C (caldecrin) [gene_biotype:protein_coding transcript_biotype:protein_co…
TC0100006989.hg.1	TC0100006989.hg.1	chr1	+	15526813	15592379	10	main	Multiple_Complex	NM_001287811 // RefSeq // Homo sapiens DnaJ (Hsp40) homolog, subfamily C, member 16 (DNAJC16), transcript variant 2, mRNA. // chr1 // 100 // 100 // 0 // --- // 0 /// NM_015291 // RefSeq // Homo sapiens DnaJ (Hsp40) homolog, subfamily C, member 16 (DNAJC16), transcript variant 1, mRNA. // chr1 // 100 // 100 // 0 // --- // 0 /// NR_109898 // RefSeq // Homo sapiens DnaJ (Hsp40) homolog, subfamily C,…
TC0100006991.hg.1	TC0100006991.hg.1	chr1	+	15617458	15669044	10	main	Multiple_Complex	NM_006511 // RefSeq // Homo sapiens regulatory solute carrier protein, family 1, member 1 (RSC1A1), mRNA. // chr1 // 100 // 100 // 0 // --- // 0 /// NM_032341 // RefSeq // Homo sapiens DNA-damage inducible 1 homolog 2 (DDI2), mRNA. // chr1 // 100 // 100 // 0 // --- // 0 /// ENST00000320153 // ENSEMBL // DNA-damage inducible 1 homolog 2 [gene_biotype:protein_coding transcript_biotype:nonsense_medi…
TC0100006994.hg.1	TC0100006994.hg.1	chr1	+	15684332	15734769	10	main	Multiple_Complex	NM_015164 // RefSeq // Homo sapiens pleckstrin homology domain containing, family M (with RUN domain) member 2 (PLEKHM2), mRNA. // chr1 // 100 // 100 // 0 // --- // 0 /// ENST00000375793 // ENSEMBL // pleckstrin homology domain containing, family M (with RUN domain) member 2 [gene_biotype:protein_coding transcript_biotype:protein_coding] // chr1 // 100 // 100 // 0 // --- // 0 /// ENST00000375799 …
TC0100006997.hg.1	TC0100006997.hg.1	chr1	+	15736314	15741396	10	main	Multiple_Complex	NM_207348 // RefSeq // Homo sapiens solute carrier family 25, member 34 (SLC25A34), mRNA. // chr1 // 100 // 100 // 0 // --- // 0 /// ENST00000294454 // ENSEMBL // solute carrier family 25, member 34 [gene_biotype:protein_coding transcript_biotype:protein_coding] // chr1 // 100 // 100 // 0 // --- // 0 /// ENST00000465495 // ENSEMBL // solute carrier family 25, member 34 [gene_biotype:protein_codin…
TC0100006998.hg.1	TC0100006998.hg.1	chr1	+	15742422	15747982	10	main	Multiple_Complex	NM_001013641 // RefSeq // Homo sapiens transmembrane protein 82 (TMEM82), mRNA. // chr1 // 100 // 100 // 0 // --- // 0 /// ENST00000375782 // ENSEMBL // transmembrane protein 82 [gene_biotype:protein_coding transcript_biotype:protein_coding] // chr1 // 100 // 100 // 0 // --- // 0 /// ENST00000465575 // ENSEMBL // transmembrane protein 82 [gene_biotype:protein_coding transcript_biotype:processed_t…
TC0100006999.hg.1	TC0100006999.hg.1	chr1	+	15756607	15786594	10	main	Multiple_Complex	NM_001024215 // RefSeq // Homo sapiens filamin binding LIM protein 1 (FBLIM1), transcript variant 2, mRNA. // chr1 // 100 // 100 // 0 // --- // 0 /// NM_001024216 // RefSeq // Homo sapiens filamin binding LIM protein 1 (FBLIM1), transcript variant 3, mRNA. // chr1 // 100 // 100 // 0 // --- // 0 /// NM_017556 // RefSeq // Homo sapiens filamin binding LIM protein 1 (FBLIM1), transcript variant 1, m…
TC0100007006.hg.1	TC0100007006.hg.1	chr1	+	15847864	15940460	10	main	Multiple_Complex	NM_015001 // RefSeq // Homo sapiens spen family transcriptional repressor (SPEN), mRNA. // chr1 // 100 // 100 // 0 // --- // 0 /// ENST00000375759 // ENSEMBL // spen family transcriptional repressor [gene_biotype:protein_coding transcript_biotype:protein_coding] // chr1 // 100 // 100 // 0 // --- // 0 /// ENST00000438066 // ENSEMBL // spen family transcriptional repressor [gene_biotype:protein_cod…
TC0100007017.hg.1	TC0100007017.hg.1	chr1	+	16004236	16008807	10	main	Coding	NM_178840 // RefSeq // Homo sapiens chromosome 1 open reading frame 64 (C1orf64), mRNA. // chr1 // 100 // 100 // 0 // --- // 0 /// ENST00000329454 // ENSEMBL // chromosome 1 open reading frame 64 [gene_biotype:protein_coding transcript_biotype:protein_coding] // chr1 // 100 // 100 // 0 // --- // 0 /// BC017946 // GenBank // Homo sapiens chromosome 1 open reading frame 64, mRNA (cDNA clone MGC:240…
TC0100007020.hg.1	TC0100007020.hg.1	chr1	+	16043736	16057326	10	main	Coding	NM_000085 // RefSeq // Homo sapiens chloride channel, voltage-sensitive Kb (CLCNKB), transcript variant 1, mRNA. // chr1 // 100 // 100 // 0 // --- // 0 /// NM_001165945 // RefSeq // Homo sapiens chloride channel, voltage-sensitive Kb (CLCNKB), transcript variant 2, mRNA. // chr1 // 100 // 100 // 0 // --- // 0 /// ENST00000375667 // ENSEMBL // chloride channel, voltage-sensitive Kb [gene_biotype:p…
TC0100007038.hg.1	TC0100007038.hg.1	chr1	+	16440672	16460089	10	main	Multiple_Complex	NM_001145277 // RefSeq // Homo sapiens NECAP endocytosis associated 2 (NECAP2), transcript variant 2, mRNA. // chr1 // 100 // 100 // 0 // --- // 0 /// NM_001145278 // RefSeq // Homo sapiens NECAP endocytosis associated 2 (NECAP2), transcript variant 3, mRNA. // chr1 // 100 // 100 // 0 // --- // 0 /// NM_018090 // RefSeq // Homo sapiens NECAP endocytosis associated 2 (NECAP2), transcript variant 1…
TC0100007050.hg.1	TC0100007050.hg.1	chr1	+	16538724	16540035	10	main	Coding	NM_001310155 // RefSeq // Homo sapiens family with sequence similarity 231, member B (FAM231B), mRNA. // chr1 // 100 // 100 // 0 // --- // 0 /// ENST00000600179 // ENSEMBL // family with sequence similarity 231, member C [gene_biotype:protein_coding transcript_biotype:protein_coding] // chr1 // 100 // 100 // 0 // --- // 0 /// OTTHUMT00000479157 // Havana transcript // family with sequence similar…
TC0100007063.hg.1	TC0100007063.hg.1	chr1	+	16673003	16673657	10	main	Coding	NM_001310138 // RefSeq // Homo sapiens family with sequence similarity 231, member C (FAM231C), mRNA. // chr1 // 100 // 100 // 0 // --- // 0 /// OTTHUMT00000479158 // Havana transcript // family with sequence similarity 231, member A[gene_biotype:protein_coding transcript_biotype:protein_coding] // chr1 // 100 // 100 // 0 // --- // 0 /// NM_001282321_3 // RefSeq // Homo sapiens family with sequen…
TC0100007091.hg.1	TC0100007091.hg.1	chr1	+	16944903	16945102	6	main	NonCoding	hsa_circ_0092359 // circbase // Zhang2013 ALT_ACCEPTOR, ALT_DONOR, coding, INTERNAL, intronic best transcript NM_014675 // chr1 // 100 // 100 // 0 // --- // 0
TC0100007102.hg.1	TC0100007102.hg.1	chr1	+	17205126	17246006	10	main	Multiple_Complex	NM_013358 // RefSeq // Homo sapiens peptidyl arginine deiminase, type I (PADI1), mRNA. // chr1 // 100 // 100 // 0 // --- // 0 /// ENST00000375471 // ENSEMBL // peptidyl arginine deiminase, type I [gene_biotype:protein_coding transcript_biotype:protein_coding] // chr1 // 100 // 100 // 0 // --- // 0 /// ENST00000460293 // ENSEMBL // peptidyl arginine deiminase, type I [gene_biotype:protein_coding t…
TC0100007103.hg.1	TC0100007103.hg.1	chr1	+	17249098	17284233	10	main	Coding	NM_016233 // RefSeq // Homo sapiens peptidyl arginine deiminase, type III (PADI3), mRNA. // chr1 // 100 // 100 // 0 // --- // 0 /// ENST00000375460 // ENSEMBL // peptidyl arginine deiminase, type III [gene_biotype:protein_coding transcript_biotype:protein_coding] // chr1 // 100 // 100 // 0 // --- // 0 /// BC041592 // GenBank // Homo sapiens peptidyl arginine deiminase, type III, mRNA (cDNA clone …
TC0100007105.hg.1	TC0100007105.hg.1	chr1	+	17308195	17364004	10	main	Multiple_Complex	NM_012387 // RefSeq // Homo sapiens peptidyl arginine deiminase, type IV (PADI4), mRNA. // chr1 // 100 // 100 // 0 // --- // 0 /// ENST00000375448 // ENSEMBL // peptidyl arginine deiminase, type IV [gene_biotype:protein_coding transcript_biotype:protein_coding] // chr1 // 100 // 100 // 0 // --- // 0 /// ENST00000375453 // ENSEMBL // peptidyl arginine deiminase, type IV [gene_biotype:protein_codin…
TC0100007108.hg.1	TC0100007108.hg.1	chr1	+	17372196	17401699	10	main	Multiple_Complex	NM_207421 // RefSeq // Homo sapiens peptidyl arginine deiminase, type VI (PADI6), mRNA. // chr1 // 100 // 100 // 0 // --- // 0 /// ENST00000619609 // ENSEMBL // peptidyl arginine deiminase, type VI [gene_biotype:protein_coding transcript_biotype:protein_coding] // chr1 // 100 // 100 // 0 // --- // 0 /// OTTHUMT00000006804 // Havana transcript // peptidyl arginine deiminase, type VI[gene_biotype:p…
TC0100007117.hg.1	TC0100007117.hg.1	chr1	+	17539835	17697875	10	main	Multiple_Complex	NM_001011722 // RefSeq // Homo sapiens Rho guanine nucleotide exchange factor (GEF) 10-like (ARHGEF10L), transcript variant 2, mRNA. // chr1 // 100 // 100 // 0 // --- // 0 /// NM_018125 // RefSeq // Homo sapiens Rho guanine nucleotide exchange factor (GEF) 10-like (ARHGEF10L), transcript variant 1, mRNA. // chr1 // 100 // 100 // 0 // --- // 0 /// ENST00000167825 // ENSEMBL // Rho guanine nucleoti…
TC0100007127.hg.1	TC0100007127.hg.1	chr1	+	17755313	17827063	10	main	Multiple_Complex	NM_030812 // RefSeq // Homo sapiens actin-like 8 (ACTL8), mRNA. // chr1 // 100 // 100 // 0 // --- // 0 /// ENST00000375406 // ENSEMBL // actin-like 8 [gene_biotype:protein_coding transcript_biotype:protein_coding] // chr1 // 100 // 100 // 0 // --- // 0 /// ENST00000617065 // ENSEMBL // actin-like 8 [gene_biotype:protein_coding transcript_biotype:protein_coding] // chr1 // 100 // 100 // 0 // --- /…
TC0100007136.hg.1	TC0100007136.hg.1	chr1	+	18107746	18378483	10	main	Multiple_Complex	NM_032880 // RefSeq // Homo sapiens immunoglobin superfamily, member 21 (IGSF21), mRNA. // chr1 // 100 // 100 // 0 // --- // 0 /// ENST00000251296 // ENSEMBL // immunoglobin superfamily, member 21 [gene_biotype:protein_coding transcript_biotype:protein_coding] // chr1 // 100 // 100 // 0 // --- // 0 /// ENST00000412684 // ENSEMBL // immunoglobin superfamily, member 21 [gene_biotype:protein_coding …
TC0100007144.hg.1	TC0100007144.hg.1	chr1	+	18480930	18486126	10	main	Multiple_Complex	NM_152375 // RefSeq // Homo sapiens kelch domain containing 7A (KLHDC7A), mRNA. // chr1 // 100 // 100 // 0 // --- // 0 /// ENST00000400664 // ENSEMBL // kelch domain containing 7A [gene_biotype:protein_coding transcript_biotype:protein_coding] // chr1 // 100 // 100 // 0 // --- // 0 /// OTTHUMT00000006923 // Havana transcript // kelch domain containing 7A[gene_biotype:protein_coding transcript_bio…
TC0100007147.hg.1	TC0100007147.hg.1	chr1	+	18631006	18748875	10	main	Multiple_Complex	NM_001135254 // RefSeq // Homo sapiens paired box 7 (PAX7), transcript variant 3, mRNA. // chr1 // 100 // 100 // 0 // --- // 0 /// NM_002584 // RefSeq // Homo sapiens paired box 7 (PAX7), transcript variant 1, mRNA. // chr1 // 100 // 100 // 0 // --- // 0 /// NM_013945 // RefSeq // Homo sapiens paired box 7 (PAX7), transcript variant 2, mRNA. // chr1 // 100 // 100 // 0 // --- // 0 /// ENST00000375…
TC0100007160.hg.1	TC0100007160.hg.1	chr1	+	19251539	19260128	10	main	Multiple_Complex	NM_016183 // RefSeq // Homo sapiens MRT4 homolog, ribosome maturation factor (MRTO4), mRNA. // chr1 // 100 // 100 // 0 // --- // 0 /// ENST00000330263 // ENSEMBL // MRT4 homolog, ribosome maturation factor [gene_biotype:protein_coding transcript_biotype:protein_coding] // chr1 // 100 // 100 // 0 // --- // 0 /// ENST00000479559 // ENSEMBL // MRT4 homolog, ribosome maturation factor [gene_biotype:p…
TC0100007162.hg.1	TC0100007162.hg.1	chr1	+	19312246	19334437	10	main	Multiple_Complex	NM_001040125 // RefSeq // Homo sapiens PQ loop repeat containing 2 (PQLC2), transcript variant 1, mRNA. // chr1 // 100 // 100 // 0 // --- // 0 /// NM_001040126 // RefSeq // Homo sapiens PQ loop repeat containing 2 (PQLC2), transcript variant 3, mRNA. // chr1 // 100 // 100 // 0 // --- // 0 /// NM_001287531 // RefSeq // Homo sapiens PQ loop repeat containing 2 (PQLC2), transcript variant 4, mRNA. /…
TC0100007175.hg.1	TC0100007175.hg.1	chr1	+	19665287	19680966	10	main	Multiple_Complex	NM_000871 // RefSeq // Homo sapiens 5-hydroxytryptamine (serotonin) receptor 6, G protein-coupled (HTR6), mRNA. // chr1 // 100 // 100 // 0 // --- // 0 /// ENST00000289753 // ENSEMBL // 5-hydroxytryptamine (serotonin) receptor 6, G protein-coupled [gene_biotype:protein_coding transcript_biotype:protein_coding] // chr1 // 100 // 100 // 0 // --- // 0 /// BC074995 // GenBank // Homo sapiens 5-hydroxy…
TC0100007184.hg.1	TC0100007184.hg.1	chr1	+	19882395	19912945	10	main	Multiple_Complex	NM_015207 // RefSeq // Homo sapiens OTU deubiquitinase 3 (OTUD3), mRNA. // chr1 // 100 // 100 // 0 // --- // 0 /// ENST00000375120 // ENSEMBL // OTU deubiquitinase 3 [gene_biotype:protein_coding transcript_biotype:protein_coding] // chr1 // 100 // 100 // 0 // --- // 0 /// ENST00000466697 // ENSEMBL // OTU deubiquitinase 3 [gene_biotype:protein_coding transcript_biotype:processed_transcript] // ch…
TC0100007188.hg.1	TC0100007188.hg.1	chr1	+	20028179	20091901	10	main	Multiple_Complex	NM_000929 // RefSeq // Homo sapiens phospholipase A2, group V (PLA2G5), mRNA. // chr1 // 100 // 100 // 0 // --- // 0 /// ENST00000375108 // ENSEMBL // phospholipase A2, group V [gene_biotype:protein_coding transcript_biotype:protein_coding] // chr1 // 100 // 100 // 0 // --- // 0 /// ENST00000460175 // ENSEMBL // phospholipase A2, group V [gene_biotype:protein_coding transcript_biotype:processed_t…
TC0100007191.hg.1	TC0100007191.hg.1	chr1	+	20139326	20150386	10	main	Multiple_Complex	NM_022819 // RefSeq // Homo sapiens phospholipase A2, group IIF (PLA2G2F), mRNA. // chr1 // 100 // 100 // 0 // --- // 0 /// ENST00000375102 // ENSEMBL // phospholipase A2, group IIF [gene_biotype:protein_coding transcript_biotype:protein_coding] // chr1 // 100 // 100 // 0 // --- // 0 /// ENST00000465062 // ENSEMBL // phospholipase A2, group IIF [gene_biotype:protein_coding transcript_biotype:reta…
TC0100007194.hg.1	TC0100007194.hg.1	chr1	+	20186078	20196048	10	main	Coding	NM_152376 // RefSeq // Homo sapiens UBX domain protein 10 (UBXN10), mRNA. // chr1 // 100 // 100 // 0 // --- // 0 /// ENST00000375099 // ENSEMBL // UBX domain protein 10 [gene_biotype:protein_coding transcript_biotype:protein_coding] // chr1 // 100 // 100 // 0 // --- // 0 /// BC047428 // GenBank // Homo sapiens UBX domain protein 10, mRNA (cDNA clone MGC:51306 IMAGE:5295853), complete cds. // chr1…
TC0100007199.hg.1	TC0100007199.hg.1	chr1	+	20290919	20354894	10	main	Multiple_Complex	NM_001039500 // RefSeq // Homo sapiens von Willebrand factor A domain containing 5B1 (VWA5B1), mRNA. // chr1 // 100 // 100 // 0 // --- // 0 /// ENST00000289815 // ENSEMBL // von Willebrand factor A domain containing 5B1 [gene_biotype:protein_coding transcript_biotype:protein_coding] // chr1 // 100 // 100 // 0 // --- // 0 /// ENST00000375079 // ENSEMBL // von Willebrand factor A domain containing …
TC0100007205.hg.1	TC0100007205.hg.1	chr1	+	20552439	20555020	10	main	Coding	NM_207334 // RefSeq // Homo sapiens family with sequence similarity 43, member B (FAM43B), mRNA. // chr1 // 100 // 100 // 0 // --- // 0 /// ENST00000332947 // ENSEMBL // family with sequence similarity 43, member B [gene_biotype:protein_coding transcript_biotype:protein_coding] // chr1 // 100 // 100 // 0 // --- // 0 /// BC142610 // GenBank // Homo sapiens family with sequence similarity 43, membe…
TC0100007206.hg.1	TC0100007206.hg.1	chr1	+	20588948	20618908	10	main	Multiple_Complex	NM_001785 // RefSeq // Homo sapiens cytidine deaminase (CDA), mRNA. // chr1 // 100 // 100 // 0 // --- // 0 /// ENST00000375071 // ENSEMBL // cytidine deaminase [gene_biotype:protein_coding transcript_biotype:protein_coding] // chr1 // 100 // 100 // 0 // --- // 0 /// ENST00000461985 // ENSEMBL // cytidine deaminase [gene_biotype:protein_coding transcript_biotype:processed_transcript] // chr1 // 10…
TC0100007207.hg.1	TC0100007207.hg.1	chr1	+	20633455	20651511	10	main	Multiple_Complex	NM_032409 // RefSeq // Homo sapiens PTEN induced putative kinase 1 (PINK1), mRNA. // chr1 // 100 // 100 // 0 // --- // 0 /// NR_106732 // RefSeq // Homo sapiens microRNA 6084 (MIR6084), microRNA. // chr1 // 100 // 100 // 0 // --- // 0 /// ENST00000321556 // ENSEMBL // PTEN induced putative kinase 1 [gene_biotype:protein_coding transcript_biotype:protein_coding] // chr1 // 100 // 100 // 0 // --- /…
TC0100007240.hg.1	TC0100007240.hg.1	chr1	+	21440090	21485005	10	main	Multiple_Complex	NM_001256416 // RefSeq // Homo sapiens neuroblastoma breakpoint family, member 3 (NBPF3), transcript variant 2, mRNA. // chr1 // 100 // 100 // 0 // --- // 0 /// NM_001256417 // RefSeq // Homo sapiens neuroblastoma breakpoint family, member 3 (NBPF3), transcript variant 3, mRNA. // chr1 // 100 // 100 // 0 // --- // 0 /// NM_032264 // RefSeq // Homo sapiens neuroblastoma breakpoint family, member 3…
TC0100007243.hg.1	TC0100007243.hg.1	chr1	+	21509365	21578412	10	main	Multiple_Complex	NM_000478 // RefSeq // Homo sapiens alkaline phosphatase, liver/bone/kidney (ALPL), transcript variant 1, mRNA. // chr1 // 100 // 100 // 0 // --- // 0 /// NM_001127501 // RefSeq // Homo sapiens alkaline phosphatase, liver/bone/kidney (ALPL), transcript variant 2, mRNA. // chr1 // 100 // 100 // 0 // --- // 0 /// NM_001177520 // RefSeq // Homo sapiens alkaline phosphatase, liver/bone/kidney (ALPL),…
TC0100007254.hg.1	TC0100007254.hg.1	chr1	+	21812265	21825221	10	main	Multiple_Complex	NM_001013693 // RefSeq // Homo sapiens low density lipoprotein receptor class A domain containing 2 (LDLRAD2), mRNA. // chr1 // 100 // 100 // 0 // --- // 0 /// ENST00000344642 // ENSEMBL // low density lipoprotein receptor class A domain containing 2 [gene_biotype:protein_coding transcript_biotype:protein_coding] // chr1 // 100 // 100 // 0 // --- // 0 /// ENST00000484271 // ENSEMBL // low density…
TC0100007255.hg.1	TC0100007255.hg.1	chr1	+	21847534	21847691	6	main	NonCoding	hsa_circ_0008411 // circbase // Jeck2013 ANTISENSE, CDS, coding, INTERNAL, intronic, OVCODE, OVEXON best transcript NM_005529 // chr1 // 100 // 100 // 0 // --- // 0
TC0100007261.hg.1	TC0100007261.hg.1	chr1	+	21976925	21998642	10	main	Multiple_Complex	NM_007352 // RefSeq // Homo sapiens chymotrypsin-like elastase family, member 3B (CELA3B), mRNA. // chr1 // 100 // 100 // 0 // --- // 0 /// ENST00000337107 // ENSEMBL // chymotrypsin-like elastase family, member 3B [gene_biotype:protein_coding transcript_biotype:protein_coding] // chr1 // 100 // 100 // 0 // --- // 0 /// ENST00000374666 // ENSEMBL // chymotrypsin-like elastase family, member 3B [g…
TC0100007264.hg.1	TC0100007264.hg.1	chr1	+	22001656	22012542	10	main	Coding	NM_005747 // RefSeq // Homo sapiens chymotrypsin-like elastase family, member 3A (CELA3A), mRNA. // chr1 // 100 // 100 // 0 // --- // 0 /// ENST00000290122 // ENSEMBL // chymotrypsin-like elastase family, member 3A [gene_biotype:protein_coding transcript_biotype:protein_coding] // chr1 // 100 // 100 // 0 // --- // 0 /// ENST00000374663 // ENSEMBL // chymotrypsin-like elastase family, member 3A [g…
TC0100007268.hg.1	TC0100007268.hg.1	chr1	+	22052627	22092946	10	main	Multiple_Complex	NM_001039802 // RefSeq // Homo sapiens cell division cycle 42 (CDC42), transcript variant 3, mRNA. // chr1 // 100 // 100 // 0 // --- // 0 /// NM_001791 // RefSeq // Homo sapiens cell division cycle 42 (CDC42), transcript variant 1, mRNA. // chr1 // 100 // 100 // 0 // --- // 0 /// NM_044472 // RefSeq // Homo sapiens cell division cycle 42 (CDC42), transcript variant 2, mRNA. // chr1 // 100 // 100 …
TC0100007283.hg.1	TC0100007283.hg.1	chr1	+	22451851	22531157	10	main	Multiple_Complex	NM_001083621 // RefSeq // Homo sapiens zinc finger and BTB domain containing 40 (ZBTB40), transcript variant 1, mRNA. // chr1 // 100 // 100 // 0 // --- // 0 /// NM_014870 // RefSeq // Homo sapiens zinc finger and BTB domain containing 40 (ZBTB40), transcript variant 2, mRNA. // chr1 // 100 // 100 // 0 // --- // 0 /// ENST00000374651 // ENSEMBL // zinc finger and BTB domain containing 40 [gene_bio…
TC0100007288.hg.1	TC0100007288.hg.1	chr1	+	22563511	22603594	10	main	Multiple_Complex	NM_001006943 // RefSeq // Homo sapiens EPH receptor A8 (EPHA8), transcript variant 2, mRNA. // chr1 // 100 // 100 // 0 // --- // 0 /// NM_020526 // RefSeq // Homo sapiens EPH receptor A8 (EPHA8), transcript variant 1, mRNA. // chr1 // 100 // 100 // 0 // --- // 0 /// ENST00000166244 // ENSEMBL // EPH receptor A8 [gene_biotype:protein_coding transcript_biotype:protein_coding] // chr1 // 100 // 100 …
TC0100007290.hg.1	TC0100007290.hg.1	chr1	+	22636506	22639682	10	main	Coding	NM_015991 // RefSeq // Homo sapiens complement component 1, q subcomponent, A chain (C1QA), mRNA. // chr1 // 100 // 100 // 0 // --- // 0 /// ENST00000374642 // ENSEMBL // complement component 1, q subcomponent, A chain [gene_biotype:protein_coding transcript_biotype:protein_coding] // chr1 // 100 // 100 // 0 // --- // 0 /// ENST00000402322 // ENSEMBL // complement component 1, q subcomponent, A c…
TC0100007291.hg.1	TC0100007291.hg.1	chr1	+	22643625	22648110	10	main	Coding	NM_001114101 // RefSeq // Homo sapiens complement component 1, q subcomponent, C chain (C1QC), transcript variant 1, mRNA. // chr1 // 100 // 100 // 0 // --- // 0 /// NM_172369 // RefSeq // Homo sapiens complement component 1, q subcomponent, C chain (C1QC), transcript variant 2, mRNA. // chr1 // 100 // 100 // 0 // --- // 0 /// ENST00000374637 // ENSEMBL // complement component 1, q subcomponent, …
TC0100007292.hg.1	TC0100007292.hg.1	chr1	+	22652762	22661538	10	main	Coding	NM_000491 // RefSeq // Homo sapiens complement component 1, q subcomponent, B chain (C1QB), mRNA. // chr1 // 100 // 100 // 0 // --- // 0 /// ENST00000314933 // ENSEMBL // complement component 1, q subcomponent, B chain [gene_biotype:protein_coding transcript_biotype:protein_coding] // chr1 // 100 // 100 // 0 // --- // 0 /// ENST00000432749 // ENSEMBL // complement component 1, q subcomponent, B c…
TC0100007295.hg.1	TC0100007295.hg.1	chr1	+	22710838	22921500	10	main	Multiple_Complex	NM_001309192 // RefSeq // Homo sapiens EPH receptor B2 (EPHB2), transcript variant 3, mRNA. // chr1 // 100 // 100 // 0 // --- // 0 /// NM_001309193 // RefSeq // Homo sapiens EPH receptor B2 (EPHB2), transcript variant 4, mRNA. // chr1 // 100 // 100 // 0 // --- // 0 /// NM_004442 // RefSeq // Homo sapiens EPH receptor B2 (EPHB2), transcript variant 2, mRNA. // chr1 // 100 // 100 // 0 // --- // 0 /…
TC0100007303.hg.1	TC0100007303.hg.1	chr1	+	23019448	23083691	10	main	Multiple_Complex	NM_001009999 // RefSeq // Homo sapiens lysine (K)-specific demethylase 1A (KDM1A), transcript variant 1, mRNA. // chr1 // 100 // 100 // 0 // --- // 0 /// NM_015013 // RefSeq // Homo sapiens lysine (K)-specific demethylase 1A (KDM1A), transcript variant 2, mRNA. // chr1 // 100 // 100 // 0 // --- // 0 /// NR_036057 // RefSeq // Homo sapiens microRNA 3115 (MIR3115), microRNA. // chr1 // 100 // 100 /…
TC0100007305.hg.1	TC0100007305.hg.1	chr1	+	23075097	23076965	6	main	Unassigned	KDM1A.kAug10-unspliced // Ace View // Transcript Identified by AceView, Entrez Gene ID(s) 23028 // chr1 // 100 // 100 // 0 // --- // 0
TC0100007315.hg.1	TC0100007315.hg.1	chr1	+	23368967	23371839	10	main	Multiple_Complex	NR_033690 // RefSeq // Homo sapiens ZNF436 antisense RNA 1 (ZNF436-AS1), transcript variant 1, long non-coding RNA. // chr1 // 100 // 100 // 0 // --- // 0 /// NR_033691 // RefSeq // Homo sapiens ZNF436 antisense RNA 1 (ZNF436-AS1), transcript variant 2, long non-coding RNA. // chr1 // 100 // 100 // 0 // --- // 0 /// BC028411 // GenBank // Homo sapiens chromosome 1 open reading frame 213, mRNA (cD…
TC0100007326.hg.1	TC0100007326.hg.1	chr1	+	23691779	23696426	10	main	Multiple_Complex	NM_000975 // RefSeq // Homo sapiens ribosomal protein L11 (RPL11), transcript variant 1, mRNA. // chr1 // 100 // 100 // 0 // --- // 0 /// NM_001199802 // RefSeq // Homo sapiens ribosomal protein L11 (RPL11), transcript variant 2, mRNA. // chr1 // 100 // 100 // 0 // --- // 0 /// ENST00000374550 // ENSEMBL // ribosomal protein L11 [gene_biotype:protein_coding transcript_biotype:protein_coding] // c…
TC0100007331.hg.1	TC0100007331.hg.1	chr1	+	23743155	23762059	10	main	Multiple_Complex	NM_003198 // RefSeq // Homo sapiens transcription elongation factor B (SIII), polypeptide 3 (110kDa, elongin A) (TCEB3), mRNA. // chr1 // 100 // 100 // 0 // --- // 0 /// ENST00000418390 // ENSEMBL // transcription elongation factor B (SIII), polypeptide 3 (110kDa, elongin A) [gene_biotype:protein_coding transcript_biotype:protein_coding] // chr1 // 100 // 100 // 0 // --- // 0 /// ENST00000487554 …
TC0100007333.hg.1	TC0100007333.hg.1	chr1	+	23778386	23788232	10	main	Multiple_Complex	NM_020362 // RefSeq // Homo sapiens PITH (C-terminal proteasome-interacting domain of thioredoxin-like) domain containing 1 (PITHD1), mRNA. // chr1 // 100 // 100 // 0 // --- // 0 /// ENST00000246151 // ENSEMBL // PITH (C-terminal proteasome-interacting domain of thioredoxin-like) domain containing 1 [gene_biotype:protein_coding transcript_biotype:protein_coding] // chr1 // 100 // 100 // 0 // --- …
TC0100007334.hg.1	TC0100007334.hg.1	chr1	+	23790970	23795539	10	main	Multiple_Complex	NM_007260 // RefSeq // Homo sapiens lysophospholipase II (LYPLA2), mRNA. // chr1 // 100 // 100 // 0 // --- // 0 /// ENST00000374501 // ENSEMBL // lysophospholipase II [gene_biotype:protein_coding transcript_biotype:protein_coding] // chr1 // 100 // 100 // 0 // --- // 0 /// ENST00000374502 // ENSEMBL // lysophospholipase II [gene_biotype:protein_coding transcript_biotype:protein_coding] // chr1 //…
TC0100007344.hg.1	TC0100007344.hg.1	chr1	+	23959109	23963462	10	main	Multiple_Complex	NM_017761 // RefSeq // Homo sapiens proline-rich nuclear receptor coactivator 2 (PNRC2), mRNA. // chr1 // 100 // 100 // 0 // --- // 0 /// ENST00000334351 // ENSEMBL // proline-rich nuclear receptor coactivator 2 [gene_biotype:protein_coding transcript_biotype:protein_coding] // chr1 // 100 // 100 // 0 // --- // 0 /// ENST00000374468 // ENSEMBL // proline-rich nuclear receptor coactivator 2 [gene_…
TC0100007361.hg.1	TC0100007361.hg.1	chr1	+	24319322	24364482	10	main	Multiple_Complex	NM_001195010 // RefSeq // Homo sapiens grainyhead-like transcription factor 3 (GRHL3), transcript variant 4, mRNA. // chr1 // 100 // 100 // 0 // --- // 0 /// NM_021180 // RefSeq // Homo sapiens grainyhead-like transcription factor 3 (GRHL3), transcript variant 1, mRNA. // chr1 // 100 // 100 // 0 // --- // 0 /// NM_198173 // RefSeq // Homo sapiens grainyhead-like transcription factor 3 (GRHL3), tr…
TC0100007365.hg.1	TC0100007365.hg.1	chr1	+	24415755	24472983	10	main	Multiple_Complex	NM_020448 // RefSeq // Homo sapiens NIPA-like domain containing 3 (NIPAL3), mRNA. // chr1 // 100 // 100 // 0 // --- // 0 /// ENST00000003912 // ENSEMBL // NIPA-like domain containing 3 [gene_biotype:protein_coding transcript_biotype:protein_coding] // chr1 // 100 // 100 // 0 // --- // 0 /// ENST00000339255 // ENSEMBL // NIPA-like domain containing 3 [gene_biotype:protein_coding transcript_biotype…
TC0100007370.hg.1	TC0100007370.hg.1	chr1	+	24502351	24541040	10	main	Multiple_Complex	NM_001251977 // RefSeq // Homo sapiens RCAN family member 3 (RCAN3), transcript variant 2, mRNA. // chr1 // 100 // 100 // 0 // --- // 0 /// NM_001251978 // RefSeq // Homo sapiens RCAN family member 3 (RCAN3), transcript variant 3, mRNA. // chr1 // 100 // 100 // 0 // --- // 0 /// NM_001251979 // RefSeq // Homo sapiens RCAN family member 3 (RCAN3), transcript variant 4, mRNA. // chr1 // 100 // 100 …
TC0100007372.hg.1	TC0100007372.hg.1	chr1	+	24556076	24609328	10	main	Multiple_Complex	NM_001010980 // RefSeq // Homo sapiens noncompact myelin associated protein (NCMAP), mRNA. // chr1 // 100 // 100 // 0 // --- // 0 /// ENST00000374392 // ENSEMBL // noncompact myelin associated protein [gene_biotype:protein_coding transcript_biotype:protein_coding] // chr1 // 100 // 100 // 0 // --- // 0 /// ENST00000486262 // ENSEMBL // noncompact myelin associated protein [gene_biotype:protein_co…
TC0100007378.hg.1	TC0100007378.hg.1	chr1	+	24745269	24844324	10	main	Multiple_Complex	NM_013943 // RefSeq // Homo sapiens chloride intracellular channel 4 (CLIC4), mRNA. // chr1 // 100 // 100 // 0 // --- // 0 /// ENST00000374379 // ENSEMBL // chloride intracellular channel 4 [gene_biotype:protein_coding transcript_biotype:protein_coding] // chr1 // 100 // 100 // 0 // --- // 0 /// ENST00000488683 // ENSEMBL // chloride intracellular channel 4 [gene_biotype:protein_coding transcript…
TC0100007396.hg.1	TC0100007396.hg.1	chr1	+	25272393	25330445	10	main	Multiple_Complex	NM_001127691 // RefSeq // Homo sapiens Rh blood group, D antigen (RHD), transcript variant 2, mRNA. // chr1 // 100 // 100 // 0 // --- // 0 /// NM_001282867 // RefSeq // Homo sapiens Rh blood group, D antigen (RHD), transcript variant 3, mRNA. // chr1 // 100 // 100 // 0 // --- // 0 /// NM_001282868 // RefSeq // Homo sapiens Rh blood group, D antigen (RHD), transcript variant 4, mRNA. // chr1 // 10…
TC0100007398.hg.1	TC0100007398.hg.1	chr1	+	25337917	25362361	10	main	Multiple_Complex	NM_014313 // RefSeq // Homo sapiens transmembrane protein 50A (TMEM50A), mRNA. // chr1 // 100 // 100 // 0 // --- // 0 /// ENST00000374358 // ENSEMBL // transmembrane protein 50A [gene_biotype:protein_coding transcript_biotype:protein_coding] // chr1 // 100 // 100 // 0 // --- // 0 /// ENST00000468704 // ENSEMBL // transmembrane protein 50A [gene_biotype:protein_coding transcript_biotype:processed_…
TC0100007403.hg.1	TC0100007403.hg.1	chr1	+	25430858	25500209	10	main	Multiple_Complex	NM_001282564 // RefSeq // Homo sapiens transmembrane protein 57 (TMEM57), transcript variant 2, mRNA. // chr1 // 100 // 100 // 0 // --- // 0 /// NM_018202 // RefSeq // Homo sapiens transmembrane protein 57 (TMEM57), transcript variant 1, mRNA. // chr1 // 100 // 100 // 0 // --- // 0 /// ENST00000374343 // ENSEMBL // transmembrane protein 57 [gene_biotype:protein_coding transcript_biotype:protein_c…
TC0100007406.hg.1	TC0100007406.hg.1	chr1	+	25543580	25568886	10	main	Multiple_Complex	NM_015627 // RefSeq // Homo sapiens low density lipoprotein receptor adaptor protein 1 (LDLRAP1), mRNA. // chr1 // 100 // 100 // 0 // --- // 0 /// ENST00000374338 // ENSEMBL // low density lipoprotein receptor adaptor protein 1 [gene_biotype:protein_coding transcript_biotype:protein_coding] // chr1 // 100 // 100 // 0 // --- // 0 /// ENST00000462394 // ENSEMBL // low density lipoprotein receptor a…
TC0100007412.hg.1	TC0100007412.hg.1	chr1	+	25617468	25786207	10	main	Multiple_Complex	NM_001289010 // RefSeq // Homo sapiens mannosidase, alpha, class 1C, member 1 (MAN1C1), transcript variant 2, mRNA. // chr1 // 100 // 100 // 0 // --- // 0 /// NM_020379 // RefSeq // Homo sapiens mannosidase, alpha, class 1C, member 1 (MAN1C1), transcript variant 1, mRNA. // chr1 // 100 // 100 // 0 // --- // 0 /// ENST00000263979 // ENSEMBL // mannosidase, alpha, class 1C, member 1 [gene_biotype:p…
TC0100007434.hg.1	TC0100007434.hg.1	chr1	+	26019884	26036464	10	main	Multiple_Complex	NM_004455 // RefSeq // Homo sapiens exostosin-like glycosyltransferase 1 (EXTL1), mRNA. // chr1 // 100 // 100 // 0 // --- // 0 /// ENST00000374280 // ENSEMBL // exostosin-like glycosyltransferase 1 [gene_biotype:protein_coding transcript_biotype:protein_coding] // chr1 // 100 // 100 // 0 // --- // 0 /// ENST00000470037 // ENSEMBL // exostosin-like glycosyltransferase 1 [gene_biotype:protein_codin…
TC0100007439.hg.1	TC0100007439.hg.1	chr1	+	26111165	26125548	10	main	Coding	NM_001243532 // RefSeq // Homo sapiens PDLIM1 interacting kinase 1 like (PDIK1L), transcript variant 2, mRNA. // chr1 // 100 // 100 // 0 // --- // 0 /// NM_001243533 // RefSeq // Homo sapiens PDLIM1 interacting kinase 1 like (PDIK1L), transcript variant 3, mRNA. // chr1 // 100 // 100 // 0 // --- // 0 /// NM_152835 // RefSeq // Homo sapiens PDLIM1 interacting kinase 1 like (PDIK1L), transcript var…
TC0100007440.hg.1	TC0100007440.hg.1	chr1	+	26159020	26162628	10	main	Coding	NM_024869 // RefSeq // Homo sapiens family with sequence similarity 110, member D (FAM110D), mRNA. // chr1 // 100 // 100 // 0 // --- // 0 /// ENST00000374268 // ENSEMBL // family with sequence similarity 110, member D [gene_biotype:protein_coding transcript_biotype:protein_coding] // chr1 // 100 // 100 // 0 // --- // 0 /// BC025658 // GenBank // Homo sapiens glycine/arginine rich protein 1, mRNA …
TC0100007442.hg.1	TC0100007442.hg.1	chr1	+	26169871	26172060	10	main	Multiple_Complex	NM_015871 // RefSeq // Homo sapiens zinc finger protein 593 (ZNF593), mRNA. // chr1 // 100 // 100 // 0 // --- // 0 /// ENST00000270812 // ENSEMBL // zinc finger protein 593 [gene_biotype:protein_coding transcript_biotype:protein_coding] // chr1 // 100 // 100 // 0 // --- // 0 /// ENST00000374266 // ENSEMBL // zinc finger protein 593 [gene_biotype:protein_coding transcript_biotype:protein_coding] /…
TC0100007444.hg.1	TC0100007444.hg.1	chr1	+	26177403	26189886	10	main	Multiple_Complex	NM_001297647 // RefSeq // Homo sapiens connector enhancer of kinase suppressor of Ras 1 (CNKSR1), transcript variant 3, mRNA. // chr1 // 100 // 100 // 0 // --- // 0 /// NM_001297648 // RefSeq // Homo sapiens connector enhancer of kinase suppressor of Ras 1 (CNKSR1), transcript variant 4, mRNA. // chr1 // 100 // 100 // 0 // --- // 0 /// NM_006314 // RefSeq // Homo sapiens connector enhancer of kin…
TC0100007445.hg.1	TC0100007445.hg.1	chr1	+	26190561	26202968	10	main	Coding	NM_198137 // RefSeq // Homo sapiens cation channel, sperm associated 4 (CATSPER4), mRNA. // chr1 // 100 // 100 // 0 // --- // 0 /// ENST00000338855 // ENSEMBL // cation channel, sperm associated 4 [gene_biotype:protein_coding transcript_biotype:protein_coding] // chr1 // 100 // 100 // 0 // --- // 0 /// ENST00000456354 // ENSEMBL // cation channel, sperm associated 4 [gene_biotype:protein_coding t…
TC0100007447.hg.1	TC0100007447.hg.1	chr1	+	26234153	26279038	10	main	Multiple_Complex	NM_001281517 // RefSeq // Homo sapiens centrosomal protein 85kDa (CEP85), transcript variant 2, mRNA. // chr1 // 100 // 100 // 0 // --- // 0 /// NM_001281518 // RefSeq // Homo sapiens centrosomal protein 85kDa (CEP85), transcript variant 3, mRNA. // chr1 // 100 // 100 // 0 // --- // 0 /// NM_022778 // RefSeq // Homo sapiens centrosomal protein 85kDa (CEP85), transcript variant 1, mRNA. // chr1 //…
TC0100007449.hg.1	TC0100007449.hg.1	chr1	+	26279176	26281522	10	main	Multiple_Complex	NM_031286 // RefSeq // Homo sapiens SH3 domain binding glutamate-rich protein like 3 (SH3BGRL3), mRNA. // chr1 // 100 // 100 // 0 // --- // 0 /// ENST00000270792 // ENSEMBL // SH3 domain binding glutamate-rich protein like 3 [gene_biotype:protein_coding transcript_biotype:protein_coding] // chr1 // 100 // 100 // 0 // --- // 0 /// ENST00000319041 // ENSEMBL // SH3 domain binding glutamate-rich pro…
TC0100007451.hg.1	TC0100007451.hg.1	chr1	+	26317920	26320523	10	main	Multiple_Complex	NM_001803 // RefSeq // Homo sapiens CD52 molecule (CD52), mRNA. // chr1 // 100 // 100 // 0 // --- // 0 /// ENST00000374213 // ENSEMBL // CD52 molecule [gene_biotype:protein_coding transcript_biotype:protein_coding] // chr1 // 100 // 100 // 0 // --- // 0 /// ENST00000470468 // ENSEMBL // CD52 molecule [gene_biotype:protein_coding transcript_biotype:processed_transcript] // chr1 // 100 // 100 // 0 …
TC0100007457.hg.1	TC0100007457.hg.1	chr1	+	26410778	26429728	10	main	Multiple_Complex	NM_024674 // RefSeq // Homo sapiens lin-28 homolog A (C. elegans) (LIN28A), mRNA. // chr1 // 100 // 100 // 0 // --- // 0 /// ENST00000254231 // ENSEMBL // lin-28 homolog A (C. elegans) [gene_biotype:protein_coding transcript_biotype:protein_coding] // chr1 // 100 // 100 // 0 // --- // 0 /// ENST00000326279 // ENSEMBL // lin-28 homolog A (C. elegans) [gene_biotype:protein_coding transcript_biotype…
TC0100007458.hg.1	TC0100007458.hg.1	chr1	+	26432282	26471304	10	main	Multiple_Complex	NM_001243564 // RefSeq // Homo sapiens dehydrodolichyl diphosphate synthase subunit (DHDDS), transcript variant 3, mRNA. // chr1 // 100 // 100 // 0 // --- // 0 /// NM_001243565 // RefSeq // Homo sapiens dehydrodolichyl diphosphate synthase subunit (DHDDS), transcript variant 4, mRNA. // chr1 // 100 // 100 // 0 // --- // 0 /// NM_024887 // RefSeq // Homo sapiens dehydrodolichyl diphosphate synthas…
TC0100007463.hg.1	TC0100007463.hg.1	chr1	+	26472411	26476642	10	main	Multiple_Complex	NM_005517 // RefSeq // Homo sapiens high mobility group nucleosomal binding domain 2 (HMGN2), mRNA. // chr1 // 100 // 100 // 0 // --- // 0 /// ENST00000361427 // ENSEMBL // high mobility group nucleosomal binding domain 2 [gene_biotype:protein_coding transcript_biotype:protein_coding] // chr1 // 100 // 100 // 0 // --- // 0 /// ENST00000460563 // ENSEMBL // high mobility group nucleosomal binding …
TC0100007469.hg.1	TC0100007469.hg.1	chr1	+	26529758	26575030	10	main	Multiple_Complex	NM_001006665 // RefSeq // Homo sapiens ribosomal protein S6 kinase, 90kDa, polypeptide 1 (RPS6KA1), transcript variant 2, mRNA. // chr1 // 100 // 100 // 0 // --- // 0 /// NM_002953 // RefSeq // Homo sapiens ribosomal protein S6 kinase, 90kDa, polypeptide 1 (RPS6KA1), transcript variant 1, mRNA. // chr1 // 100 // 100 // 0 // --- // 0 /// ENST00000366866 // ENSEMBL // ribosomal protein S6 kinase, 9…
TC0100007471.hg.1	TC0100007471.hg.1	chr1	+	26572454	26572673	6	main	NonCoding	hsa_circ_0092329 // circbase // Zhang2013 ALT_ACCEPTOR, ALT_DONOR, coding, INTERNAL, intronic best transcript NM_002953 // chr1 // 100 // 100 // 0 // --- // 0
TC0100007477.hg.1	TC0100007477.hg.1	chr1	+	26696031	26782110	10	main	Multiple_Complex	NM_006015 // RefSeq // Homo sapiens AT rich interactive domain 1A (SWI-like) (ARID1A), transcript variant 1, mRNA. // chr1 // 100 // 100 // 0 // --- // 0 /// NM_139135 // RefSeq // Homo sapiens AT rich interactive domain 1A (SWI-like) (ARID1A), transcript variant 2, mRNA. // chr1 // 100 // 100 // 0 // --- // 0 /// ENST00000324856 // ENSEMBL // AT rich interactive domain 1A (SWI-like) [gene_biotyp…
TC0100007481.hg.1	TC0100007481.hg.1	chr1	+	26787472	26798403	10	main	Multiple_Complex	NM_001202554 // RefSeq // Homo sapiens phosphatidylinositol glycan anchor biosynthesis, class V (PIGV), transcript variant 1, mRNA. // chr1 // 100 // 100 // 0 // --- // 0 /// NM_017837 // RefSeq // Homo sapiens phosphatidylinositol glycan anchor biosynthesis, class V (PIGV), transcript variant 2, mRNA. // chr1 // 100 // 100 // 0 // --- // 0 /// ENST00000078527 // ENSEMBL // phosphatidylinositol g…
TC0100007484.hg.1	TC0100007484.hg.1	chr1	+	26826710	26857602	10	main	Multiple_Complex	NM_032283 // RefSeq // Homo sapiens zinc finger, DHHC-type containing 18 (ZDHHC18), mRNA. // chr1 // 100 // 100 // 0 // --- // 0 /// ENST00000374141 // ENSEMBL // zinc finger, DHHC-type containing 18 [gene_biotype:protein_coding transcript_biotype:protein_coding] // chr1 // 100 // 100 // 0 // --- // 0 /// ENST00000374142 // ENSEMBL // zinc finger, DHHC-type containing 18 [gene_biotype:protein_cod…
TC0100007486.hg.1	TC0100007486.hg.1	chr1	+	26863138	26864457	10	main	Coding	NM_006142 // RefSeq // Homo sapiens stratifin (SFN), mRNA. // chr1 // 100 // 100 // 0 // --- // 0 /// ENST00000339276 // ENSEMBL // stratifin [gene_biotype:protein_coding transcript_biotype:protein_coding] // chr1 // 100 // 100 // 0 // --- // 0 /// BC000329 // GenBank // Homo sapiens stratifin, mRNA (cDNA clone MGC:8516 IMAGE:2822397), complete cds. // chr1 // 100 // 100 // 0 // --- // 0 /// BC00…
TC0100007489.hg.1	TC0100007489.hg.1	chr1	+	26900238	26946871	10	main	Multiple_Complex	NM_006600 // RefSeq // Homo sapiens nudC nuclear distribution protein (NUDC), mRNA. // chr1 // 100 // 100 // 0 // --- // 0 /// ENST00000321265 // ENSEMBL // nudC nuclear distribution protein [gene_biotype:protein_coding transcript_biotype:protein_coding] // chr1 // 100 // 100 // 0 // --- // 0 /// ENST00000435827 // ENSEMBL // nudC nuclear distribution protein [gene_biotype:protein_coding transcri…
TC0100007493.hg.1	TC0100007493.hg.1	chr1	+	26993704	27000898	10	main	Multiple_Complex	NM_001013642 // RefSeq // Homo sapiens TMF1-regulated nuclear protein 1 (TRNP1), mRNA. // chr1 // 100 // 100 // 0 // --- // 0 /// ENST00000522111 // ENSEMBL // TMF1-regulated nuclear protein 1 [gene_biotype:protein_coding transcript_biotype:protein_coding] // chr1 // 100 // 100 // 0 // --- // 0 /// ENST00000531285 // ENSEMBL // TMF1-regulated nuclear protein 1 [gene_biotype:protein_coding transcr…
TC0100007505.hg.1	TC0100007505.hg.1	chr1	+	27234516	27308633	10	main	Multiple_Complex	NM_001276252 // RefSeq // Homo sapiens WD and tetratricopeptide repeats 1 (WDTC1), transcript variant 1, mRNA. // chr1 // 100 // 100 // 0 // --- // 0 /// NM_015023 // RefSeq // Homo sapiens WD and tetratricopeptide repeats 1 (WDTC1), transcript variant 2, mRNA. // chr1 // 100 // 100 // 0 // --- // 0 /// ENST00000319394 // ENSEMBL // WD and tetratricopeptide repeats 1 [gene_biotype:protein_coding …
TC0100007507.hg.1	TC0100007507.hg.1	chr1	+	27322145	27336400	10	main	Multiple_Complex	NM_032125 // RefSeq // Homo sapiens transmembrane protein 222 (TMEM222), transcript variant 1, mRNA. // chr1 // 100 // 100 // 0 // --- // 0 /// NR_037576 // RefSeq // Homo sapiens transmembrane protein 222 (TMEM222), transcript variant 2, non-coding RNA. // chr1 // 100 // 100 // 0 // --- // 0 /// NR_037577 // RefSeq // Homo sapiens transmembrane protein 222 (TMEM222), transcript variant 3, non-co…
TC0100007510.hg.1	TC0100007510.hg.1	chr1	+	27341992	27353937	10	main	Multiple_Complex	NM_001193308 // RefSeq // Homo sapiens synaptotagmin-like 1 (SYTL1), transcript variant 1, mRNA. // chr1 // 100 // 100 // 0 // --- // 0 /// NM_032872 // RefSeq // Homo sapiens synaptotagmin-like 1 (SYTL1), transcript variant 2, mRNA. // chr1 // 100 // 100 // 0 // --- // 0 /// ENST00000318074 // ENSEMBL // synaptotagmin-like 1 [gene_biotype:protein_coding transcript_biotype:protein_coding] // chr1…
TC0100007512.hg.1	TC0100007512.hg.1	chr1	+	27392644	27395814	10	main	Coding	NM_005281 // RefSeq // Homo sapiens G protein-coupled receptor 3 (GPR3), mRNA. // chr1 // 100 // 100 // 0 // --- // 0 /// ENST00000374024 // ENSEMBL // G protein-coupled receptor 3 [gene_biotype:protein_coding transcript_biotype:protein_coding] // chr1 // 100 // 100 // 0 // --- // 0 /// BC032702 // GenBank // Homo sapiens G protein-coupled receptor 3, mRNA (cDNA clone MGC:45242 IMAGE:5247608), co…
TC0100007514.hg.1	TC0100007514.hg.1	chr1	+	27420914	27421242	6	main	NonCoding	hsa_circ_0000035 // circbase // Memczak2013 ANTISENSE, coding, INTERNAL, intronic best transcript NM_006990 // chr1 // 100 // 100 // 0 // --- // 0
TC0100007529.hg.1	TC0100007529.hg.1	chr1	+	27725979	27763122	10	main	Multiple_Complex	NM_001143912 // RefSeq // Homo sapiens family with sequence similarity 76, member A (FAM76A), transcript variant 1, mRNA. // chr1 // 100 // 100 // 0 // --- // 0 /// NM_001143913 // RefSeq // Homo sapiens family with sequence similarity 76, member A (FAM76A), transcript variant 2, mRNA. // chr1 // 100 // 100 // 0 // --- // 0 /// NM_001143914 // RefSeq // Homo sapiens family with sequence similarit…
TC0100007532.hg.1	TC0100007532.hg.1	chr1	+	27773183	27824452	10	main	Multiple_Complex	NM_177424 // RefSeq // Homo sapiens syntaxin 12 (STX12), mRNA. // chr1 // 100 // 100 // 0 // --- // 0 /// ENST00000373943 // ENSEMBL // syntaxin 12 [gene_biotype:protein_coding transcript_biotype:protein_coding] // chr1 // 100 // 100 // 0 // --- // 0 /// ENST00000440806 // ENSEMBL // syntaxin 12 [gene_biotype:protein_coding transcript_biotype:protein_coding] // chr1 // 100 // 100 // 0 // --- // 0…
TC0100007538.hg.1	TC0100007538.hg.1	chr1	+	27830741	27851676	10	main	Multiple_Complex	NM_002713 // RefSeq // Homo sapiens protein phosphatase 1, regulatory subunit 8 (PPP1R8), transcript variant 3, mRNA. // chr1 // 100 // 100 // 0 // --- // 0 /// NM_014110 // RefSeq // Homo sapiens protein phosphatase 1, regulatory subunit 8 (PPP1R8), transcript variant 1, mRNA. // chr1 // 100 // 100 // 0 // --- // 0 /// NM_138558 // RefSeq // Homo sapiens protein phosphatase 1, regulatory subunit…
TC0100007540.hg.1	TC0100007540.hg.1	chr1	+	27872543	27886685	10	main	Multiple_Complex	NM_001039477 // RefSeq // Homo sapiens thymocyte selection associated family member 2 (THEMIS2), transcript variant 2, mRNA. // chr1 // 100 // 100 // 0 // --- // 0 /// NM_001105556 // RefSeq // Homo sapiens thymocyte selection associated family member 2 (THEMIS2), transcript variant 3, mRNA. // chr1 // 100 // 100 // 0 // --- // 0 /// NM_001286113 // RefSeq // Homo sapiens thymocyte selection asso…
TC0100007542.hg.1	TC0100007542.hg.1	chr1	+	27934955	27959157	10	main	Multiple_Complex	NM_001009568 // RefSeq // Homo sapiens sphingomyelin phosphodiesterase, acid-like 3B (SMPDL3B), transcript variant 2, mRNA. // chr1 // 100 // 100 // 0 // --- // 0 /// NM_001304579 // RefSeq // Homo sapiens sphingomyelin phosphodiesterase, acid-like 3B (SMPDL3B), transcript variant 3, mRNA. // chr1 // 100 // 100 // 0 // --- // 0 /// NM_014474 // RefSeq // Homo sapiens sphingomyelin phosphodiestera…
TC0100007543.hg.1	TC0100007543.hg.1	chr1	+	27959462	27968096	10	main	Multiple_Complex	NM_018053 // RefSeq // Homo sapiens XK, Kell blood group complex subunit-related family, member 8 (XKR8), mRNA. // chr1 // 100 // 100 // 0 // --- // 0 /// ENST00000373884 // ENSEMBL // XK, Kell blood group complex subunit-related family, member 8 [gene_biotype:protein_coding transcript_biotype:protein_coding] // chr1 // 100 // 100 // 0 // --- // 0 /// ENST00000481387 // ENSEMBL // XK, Kell blood …
TC0100007550.hg.1	TC0100007550.hg.1	chr1	+	28236091	28246906	10	main	Multiple_Complex	NM_016311 // RefSeq // Homo sapiens ATPase inhibitory factor 1 (ATPIF1), transcript variant 1, mRNA. // chr1 // 100 // 100 // 0 // --- // 0 /// NM_178190 // RefSeq // Homo sapiens ATPase inhibitory factor 1 (ATPIF1), transcript variant 2, mRNA. // chr1 // 100 // 100 // 0 // --- // 0 /// NM_178191 // RefSeq // Homo sapiens ATPase inhibitory factor 1 (ATPIF1), transcript variant 3, mRNA. // chr1 //…
TC0100007552.hg.1	TC0100007552.hg.1	chr1	+	28259452	28282491	10	main	Multiple_Complex	NM_031459 // RefSeq // Homo sapiens sestrin 2 (SESN2), mRNA. // chr1 // 100 // 100 // 0 // --- // 0 /// ENST00000253063 // ENSEMBL // sestrin 2 [gene_biotype:protein_coding transcript_biotype:protein_coding] // chr1 // 100 // 100 // 0 // --- // 0 /// BC013304 // GenBank // Homo sapiens sestrin 2, mRNA (cDNA clone MGC:4448 IMAGE:2959845), complete cds. // chr1 // 100 // 100 // 0 // --- // 0 /// BC…
TC0100007555.hg.1	TC0100007555.hg.1	chr1	+	28329002	28335967	10	main	Multiple_Complex	NM_001127350 // RefSeq // Homo sapiens mediator complex subunit 18 (MED18), transcript variant 2, mRNA. // chr1 // 100 // 100 // 0 // --- // 0 /// NM_017638 // RefSeq // Homo sapiens mediator complex subunit 18 (MED18), transcript variant 1, mRNA. // chr1 // 100 // 100 // 0 // --- // 0 /// ENST00000373842 // ENSEMBL // mediator complex subunit 18 [gene_biotype:protein_coding transcript_biotype:pr…
TC0100007556.hg.1	TC0100007556.hg.1	chr1	+	28369582	28502771	10	main	Multiple_Complex	NM_001048183 // RefSeq // Homo sapiens phosphatase and actin regulator 4 (PHACTR4), transcript variant 1, mRNA. // chr1 // 100 // 100 // 0 // --- // 0 /// NM_023923 // RefSeq // Homo sapiens phosphatase and actin regulator 4 (PHACTR4), transcript variant 2, mRNA. // chr1 // 100 // 100 // 0 // --- // 0 /// ENST00000373836 // ENSEMBL // phosphatase and actin regulator 4 [gene_biotype:protein_coding…
TC0100007559.hg.1	TC0100007559.hg.1	chr1	+	28505942	28539300	10	main	Multiple_Complex	NM_001048194 // RefSeq // Homo sapiens regulator of chromosome condensation 1 (RCC1), transcript variant 1, mRNA. // chr1 // 100 // 100 // 0 // --- // 0 /// NM_001048195 // RefSeq // Homo sapiens regulator of chromosome condensation 1 (RCC1), transcript variant 2, mRNA. // chr1 // 100 // 100 // 0 // --- // 0 /// NM_001048199 // RefSeq // Homo sapiens regulator of chromosome condensation 1 (RCC1),…
TC0100007562.hg.1	TC0100007562.hg.1	chr1	+	28553017	28578545	10	main	Multiple_Complex	NM_017846 // RefSeq // Homo sapiens tRNA selenocysteine 1 associated protein 1 (TRNAU1AP), transcript variant 1, mRNA. // chr1 // 100 // 100 // 0 // --- // 0 /// NR_003109 // RefSeq // Homo sapiens tRNA selenocysteine 1 associated protein 1 (TRNAU1AP), transcript variant 2, non-coding RNA. // chr1 // 100 // 100 // 0 // --- // 0 /// ENST00000373830 // ENSEMBL // tRNA selenocysteine 1 associated pr…
TC0100007564.hg.1	TC0100007564.hg.1	chr1	+	28592200	28595443	10	main	Multiple_Complex	NM_001193532 // RefSeq // Homo sapiens RAB42, member RAS oncogene family (RAB42), transcript variant 1, mRNA. // chr1 // 100 // 100 // 0 // --- // 0 /// NM_152304 // RefSeq // Homo sapiens RAB42, member RAS oncogene family (RAB42), transcript variant 2, mRNA. // chr1 // 100 // 100 // 0 // --- // 0 /// ENST00000373826 // ENSEMBL // RAB42, member RAS oncogene family [gene_biotype:protein_coding tra…
TC0100007569.hg.1	TC0100007569.hg.1	chr1	+	28668728	28719353	10	main	Multiple_Complex	NM_006582 // RefSeq // Homo sapiens glucocorticoid modulatory element binding protein 1 (GMEB1), transcript variant 1, mRNA. // chr1 // 100 // 100 // 0 // --- // 0 /// NM_024482 // RefSeq // Homo sapiens glucocorticoid modulatory element binding protein 1 (GMEB1), transcript variant 2, mRNA. // chr1 // 100 // 100 // 0 // --- // 0 /// ENST00000294409 // ENSEMBL // glucocorticoid modulatory element…
TC0100007570.hg.1	TC0100007570.hg.1	chr1	+	28736621	28769775	10	main	Multiple_Complex	NM_001172828 // RefSeq // Homo sapiens YTH N(6)-methyladenosine RNA binding protein 2 (YTHDF2), transcript variant 3, mRNA. // chr1 // 100 // 100 // 0 // --- // 0 /// NM_001173128 // RefSeq // Homo sapiens YTH N(6)-methyladenosine RNA binding protein 2 (YTHDF2), transcript variant 2, mRNA. // chr1 // 100 // 100 // 0 // --- // 0 /// NM_016258 // RefSeq // Homo sapiens YTH N(6)-methyladenosine RNA …
TC0100007573.hg.1	TC0100007573.hg.1	chr1	+	28812142	28871712	10	main	Multiple_Complex	NM_000911 // RefSeq // Homo sapiens opioid receptor, delta 1 (OPRD1), mRNA. // chr1 // 100 // 100 // 0 // --- // 0 /// ENST00000234961 // ENSEMBL // opioid receptor, delta 1 [gene_biotype:protein_coding transcript_biotype:protein_coding] // chr1 // 100 // 100 // 0 // --- // 0 /// ENST00000621425 // ENSEMBL // opioid receptor, delta 1 [gene_biotype:protein_coding transcript_biotype:protein_coding]…
TC0100007574.hg.1	TC0100007574.hg.1	chr1	+	28887091	29120446	10	main	Multiple_Complex	NM_001166005 // RefSeq // Homo sapiens erythrocyte membrane protein band 4.1 (EPB41), transcript variant 1, mRNA. // chr1 // 100 // 100 // 0 // --- // 0 /// NM_001166006 // RefSeq // Homo sapiens erythrocyte membrane protein band 4.1 (EPB41), transcript variant 3, mRNA. // chr1 // 100 // 100 // 0 // --- // 0 /// NM_001166007 // RefSeq // Homo sapiens erythrocyte membrane protein band 4.1 (EPB41),…
TC0100007575.hg.1	TC0100007575.hg.1	chr1	+	28915000	28915140	6	main	NonCoding	hsa_circ_0000040 // circbase // Memczak2013 ALT_ACCEPTOR, ALT_DONOR, coding, INTERNAL, intronic best transcript NM_001166007 // chr1 // 100 // 100 // 0 // --- // 0
TC0100007584.hg.1	TC0100007584.hg.1	chr1	+	29236516	29326813	10	main	Multiple_Complex	NM_001195001 // RefSeq // Homo sapiens protein tyrosine phosphatase, receptor type, U (PTPRU), transcript variant 4, mRNA. // chr1 // 100 // 100 // 0 // --- // 0 /// NM_005704 // RefSeq // Homo sapiens protein tyrosine phosphatase, receptor type, U (PTPRU), transcript variant 3, mRNA. // chr1 // 100 // 100 // 0 // --- // 0 /// NM_133177 // RefSeq // Homo sapiens protein tyrosine phosphatase, rece…
TC0100007634.hg.1	TC0100007634.hg.1	chr1	+	31296982	31364953	10	main	Multiple_Complex	NM_001282566 // RefSeq // Homo sapiens zinc finger, CCHC domain containing 17 (ZCCHC17), transcript variant 1, mRNA. // chr1 // 100 // 100 // 0 // --- // 0 /// NM_001282567 // RefSeq // Homo sapiens zinc finger, CCHC domain containing 17 (ZCCHC17), transcript variant 2, mRNA. // chr1 // 100 // 100 // 0 // --- // 0 /// NM_001282568 // RefSeq // Homo sapiens zinc finger, CCHC domain containing 17 (…
TC0100007638.hg.1	TC0100007638.hg.1	chr1	+	31409565	31434680	10	main	Multiple_Complex	NM_001199037 // RefSeq // Homo sapiens serine incorporator 2 (SERINC2), transcript variant 3, mRNA. // chr1 // 100 // 100 // 0 // --- // 0 /// NM_001199038 // RefSeq // Homo sapiens serine incorporator 2 (SERINC2), transcript variant 4, mRNA. // chr1 // 100 // 100 // 0 // --- // 0 /// NM_001199039 // RefSeq // Homo sapiens serine incorporator 2 (SERINC2), transcript variant 5, mRNA. // chr1 // 10…
TC0100007641.hg.1	TC0100007641.hg.1	chr1	+	31500085	31540885	10	main	Multiple_Complex	NR_034112 // RefSeq // Homo sapiens long intergenic non-protein coding RNA 1225 (LINC01225), non-coding RNA. // chr1 // 100 // 100 // 0 // --- // 0 /// ENST00000562069 // ENSEMBL // long intergenic non-protein coding RNA 1225 [gene_biotype:unitary_pseudogene transcript_biotype:processed_transcript] // chr1 // 100 // 100 // 0 // --- // 0 /// ENST00000562271 // ENSEMBL // long intergenic non-protei…
TC0100007645.hg.1	TC0100007645.hg.1	chr1	+	31576485	31587686	10	main	Multiple_Complex	NM_001204414 // RefSeq // Homo sapiens tubulointerstitial nephritis antigen-like 1 (TINAGL1), transcript variant 2, mRNA. // chr1 // 100 // 100 // 0 // --- // 0 /// NM_001204415 // RefSeq // Homo sapiens tubulointerstitial nephritis antigen-like 1 (TINAGL1), transcript variant 3, mRNA. // chr1 // 100 // 100 // 0 // --- // 0 /// NM_022164 // RefSeq // Homo sapiens tubulointerstitial nephritis anti…
TC0100007646.hg.1	TC0100007646.hg.1	chr1	+	31617686	31632518	10	main	Multiple_Complex	NM_001525 // RefSeq // Homo sapiens hypocretin (orexin) receptor 1 (HCRTR1), mRNA. // chr1 // 100 // 100 // 0 // --- // 0 /// ENST00000373705 // ENSEMBL // hypocretin (orexin) receptor 1 [gene_biotype:protein_coding transcript_biotype:protein_coding] // chr1 // 100 // 100 // 0 // --- // 0 /// ENST00000373706 // ENSEMBL // hypocretin (orexin) receptor 1 [gene_biotype:protein_coding transcript_biot…
TC0100007659.hg.1	TC0100007659.hg.1	chr1	+	32013694	32060859	10	main	Multiple_Complex	NM_001271878 // RefSeq // Homo sapiens KH domain containing, RNA binding, signal transduction associated 1 (KHDRBS1), transcript variant 2, mRNA. // chr1 // 100 // 100 // 0 // --- // 0 /// NM_006559 // RefSeq // Homo sapiens KH domain containing, RNA binding, signal transduction associated 1 (KHDRBS1), transcript variant 1, mRNA. // chr1 // 100 // 100 // 0 // --- // 0 /// NR_073498 // RefSeq // H…
TC0100007660.hg.1	TC0100007660.hg.1	chr1	+	32072031	32102866	10	main	Multiple_Complex	NM_018056 // RefSeq // Homo sapiens transmembrane protein 39B (TMEM39B), mRNA. // chr1 // 100 // 100 // 0 // --- // 0 /// ENST00000336294 // ENSEMBL // transmembrane protein 39B [gene_biotype:protein_coding transcript_biotype:protein_coding] // chr1 // 100 // 100 // 0 // --- // 0 /// ENST00000438825 // ENSEMBL // transmembrane protein 39B [gene_biotype:protein_coding transcript_biotype:protein_co…
TC0100007662.hg.1	TC0100007662.hg.1	chr1	+	32108038	32176568	10	main	Multiple_Complex	NM_012316 // RefSeq // Homo sapiens karyopherin alpha 6 (importin alpha 7) (KPNA6), mRNA. // chr1 // 100 // 100 // 0 // --- // 0 /// ENST00000373625 // ENSEMBL // karyopherin alpha 6 (importin alpha 7) [gene_biotype:protein_coding transcript_biotype:protein_coding] // chr1 // 100 // 100 // 0 // --- // 0 /// ENST00000446515 // ENSEMBL // karyopherin alpha 6 (importin alpha 7) [gene_biotype:protein…
TC0100007666.hg.1	TC0100007666.hg.1	chr1	+	32139179	32139864	6	main	NonCoding	hsa_circ_0002834 // circbase // Jeck2013 ALT_ACCEPTOR, ALT_DONOR, coding, INTERNAL, intronic best transcript NM_012316 // chr1 // 100 // 100 // 0 // --- // 0
TC0100007668.hg.1	TC0100007668.hg.1	chr1	+	32179686	32198285	10	main	Multiple_Complex	NM_175852 // RefSeq // Homo sapiens taxilin alpha (TXLNA), mRNA. // chr1 // 100 // 100 // 0 // --- // 0 /// ENST00000373609 // ENSEMBL // taxilin alpha [gene_biotype:protein_coding transcript_biotype:protein_coding] // chr1 // 100 // 100 // 0 // --- // 0 /// ENST00000373610 // ENSEMBL // taxilin alpha [gene_biotype:protein_coding transcript_biotype:protein_coding] // chr1 // 100 // 100 // 0 // --…
TC0100007669.hg.1	TC0100007669.hg.1	chr1	+	32200386	32205390	10	main	Multiple_Complex	NM_001301011 // RefSeq // Homo sapiens coiled-coil domain containing 28B (CCDC28B), transcript variant 1, mRNA. // chr1 // 100 // 100 // 0 // --- // 0 /// NM_024296 // RefSeq // Homo sapiens coiled-coil domain containing 28B (CCDC28B), transcript variant 2, mRNA. // chr1 // 100 // 100 // 0 // --- // 0 /// ENST00000373602 // ENSEMBL // coiled-coil domain containing 28B [gene_biotype:protein_coding…
TC0100007670.hg.1	TC0100007670.hg.1	chr1	+	32205635	32208687	10	main	Multiple_Complex	NM_001160042 // RefSeq // Homo sapiens IQ motif containing C (IQCC), transcript variant 1, mRNA. // chr1 // 100 // 100 // 0 // --- // 0 /// NM_018134 // RefSeq // Homo sapiens IQ motif containing C (IQCC), transcript variant 2, mRNA. // chr1 // 100 // 100 // 0 // --- // 0 /// ENST00000291358 // ENSEMBL // IQ motif containing C [gene_biotype:protein_coding transcript_biotype:protein_coding] // chr…
TC0100007671.hg.1	TC0100007671.hg.1	chr1	+	32209094	32216196	10	main	Multiple_Complex	NM_001099434 // RefSeq // Homo sapiens doublecortin domain containing 2B (DCDC2B), mRNA. // chr1 // 100 // 100 // 0 // --- // 0 /// ENST00000409358 // ENSEMBL // doublecortin domain containing 2B [gene_biotype:protein_coding transcript_biotype:protein_coding] // chr1 // 100 // 100 // 0 // --- // 0 /// ENST00000487056 // ENSEMBL // doublecortin domain containing 2B [gene_biotype:protein_coding tra…
TC0100007672.hg.1	TC0100007672.hg.1	chr1	+	32221584	32231604	10	main	Multiple_Complex	NM_003757 // RefSeq // Homo sapiens eukaryotic translation initiation factor 3, subunit I (EIF3I), mRNA. // chr1 // 100 // 100 // 0 // --- // 0 /// ENST00000355082 // ENSEMBL // eukaryotic translation initiation factor 3, subunit I [gene_biotype:protein_coding transcript_biotype:protein_coding] // chr1 // 100 // 100 // 0 // --- // 0 /// ENST00000373586 // ENSEMBL // eukaryotic translation initiat…
TC0100007675.hg.1	TC0100007675.hg.1	chr1	+	32247217	32248860	10	main	Coding	NM_032648 // RefSeq // Homo sapiens family with sequence similarity 167, member B (FAM167B), mRNA. // chr1 // 100 // 100 // 0 // --- // 0 /// ENST00000373582 // ENSEMBL // family with sequence similarity 167, member B [gene_biotype:protein_coding transcript_biotype:protein_coding] // chr1 // 100 // 100 // 0 // --- // 0 /// BC004269 // GenBank // Homo sapiens family with sequence similarity 167, m…
TC0100007676.hg.1	TC0100007676.hg.1	chr1	+	32251239	32286167	10	main	Multiple_Complex	NM_001042771 // RefSeq // Homo sapiens LCK proto-oncogene, Src family tyrosine kinase (LCK), transcript variant 1, mRNA. // chr1 // 100 // 100 // 0 // --- // 0 /// NM_005356 // RefSeq // Homo sapiens LCK proto-oncogene, Src family tyrosine kinase (LCK), transcript variant 2, mRNA. // chr1 // 100 // 100 // 0 // --- // 0 /// ENST00000333070 // ENSEMBL // LCK proto-oncogene, Src family tyrosine kina…
TC0100007678.hg.1	TC0100007678.hg.1	chr1	+	32292086	32333635	10	main	Multiple_Complex	NM_004964 // RefSeq // Homo sapiens histone deacetylase 1 (HDAC1), mRNA. // chr1 // 100 // 100 // 0 // --- // 0 /// ENST00000373548 // ENSEMBL // histone deacetylase 1 [gene_biotype:protein_coding transcript_biotype:protein_coding] // chr1 // 100 // 100 // 0 // --- // 0 /// ENST00000428704 // ENSEMBL // histone deacetylase 1 [gene_biotype:protein_coding transcript_biotype:protein_coding] // chr1 …
TC0100007690.hg.1	TC0100007690.hg.1	chr1	+	32651142	32686211	10	main	Multiple_Complex	NM_001135255 // RefSeq // Homo sapiens retinoblastoma binding protein 4 (RBBP4), transcript variant 2, mRNA. // chr1 // 100 // 100 // 0 // --- // 0 /// NM_001135256 // RefSeq // Homo sapiens retinoblastoma binding protein 4 (RBBP4), transcript variant 3, mRNA. // chr1 // 100 // 100 // 0 // --- // 0 /// NM_005610 // RefSeq // Homo sapiens retinoblastoma binding protein 4 (RBBP4), transcript varian…
TC0100007691.hg.1	TC0100007691.hg.1	chr1	+	32741885	32774970	10	main	Multiple_Complex	NM_001198972 // RefSeq // Homo sapiens KIAA1522 (KIAA1522), transcript variant 2, mRNA. // chr1 // 100 // 100 // 0 // --- // 0 /// NM_001198973 // RefSeq // Homo sapiens KIAA1522 (KIAA1522), transcript variant 3, mRNA. // chr1 // 100 // 100 // 0 // --- // 0 /// NM_020888 // RefSeq // Homo sapiens KIAA1522 (KIAA1522), transcript variant 1, mRNA. // chr1 // 100 // 100 // 0 // --- // 0 /// ENST00000…
TC0100007693.hg.1	TC0100007693.hg.1	chr1	+	32816767	32858879	10	main	Multiple_Complex	NM_001256121 // RefSeq // Homo sapiens S100P binding protein (S100PBP), transcript variant 3, mRNA. // chr1 // 100 // 100 // 0 // --- // 0 /// NM_022753 // RefSeq // Homo sapiens S100P binding protein (S100PBP), transcript variant 1, mRNA. // chr1 // 100 // 100 // 0 // --- // 0 /// ENST00000356689 // ENSEMBL // S100P binding protein [gene_biotype:protein_coding transcript_biotype:processed_transc…
TC0100007694.hg.1	TC0100007694.hg.1	chr1	+	32885994	32898441	10	main	Multiple_Complex	NM_002143 // RefSeq // Homo sapiens hippocalcin (HPCA), mRNA. // chr1 // 100 // 100 // 0 // --- // 0 /// ENST00000373467 // ENSEMBL // hippocalcin [gene_biotype:protein_coding transcript_biotype:protein_coding] // chr1 // 100 // 100 // 0 // --- // 0 /// ENST00000459874 // ENSEMBL // hippocalcin [gene_biotype:protein_coding transcript_biotype:processed_transcript] // chr1 // 100 // 100 // 0 // ---…
TC0100007698.hg.1	TC0100007698.hg.1	chr1	+	32964098	32964238	6	main	NonCoding	hsa_circ_0000049 // circbase // Memczak2013 ANTISENSE, CDS, coding, INTERNAL best transcript NM_153341 // chr1 // 100 // 100 // 0 // --- // 0
TC0100007705.hg.1	TC0100007705.hg.1	chr1	+	33081104	33120531	10	main	Multiple_Complex	NM_001293562 // RefSeq // Homo sapiens antizyme inhibitor 2 (AZIN2), transcript variant 2, mRNA. // chr1 // 100 // 100 // 0 // --- // 0 /// NM_001301823 // RefSeq // Homo sapiens antizyme inhibitor 2 (AZIN2), transcript variant 3, mRNA. // chr1 // 100 // 100 // 0 // --- // 0 /// NM_001301824 // RefSeq // Homo sapiens antizyme inhibitor 2 (AZIN2), transcript variant 4, mRNA. // chr1 // 100 // 100 …
TC0100007716.hg.1	TC0100007716.hg.1	chr1	+	33256545	33300719	10	main	Multiple_Complex	NM_152493 // RefSeq // Homo sapiens zinc finger protein 362 (ZNF362), mRNA. // chr1 // 100 // 100 // 0 // --- // 0 /// ENST00000373428 // ENSEMBL // zinc finger protein 362 [gene_biotype:protein_coding transcript_biotype:protein_coding] // chr1 // 100 // 100 // 0 // --- // 0 /// ENST00000477934 // ENSEMBL // zinc finger protein 362 [gene_biotype:protein_coding transcript_biotype:retained_intron] …
TC0100007725.hg.1	TC0100007725.hg.1	chr1	+	33472631	33496507	10	main	Multiple_Complex	NM_145238 // RefSeq // Homo sapiens zinc finger and SCAN domain containing 20 (ZSCAN20), mRNA. // chr1 // 100 // 100 // 0 // --- // 0 /// ENST00000361328 // ENSEMBL // zinc finger and SCAN domain containing 20 [gene_biotype:protein_coding transcript_biotype:protein_coding] // chr1 // 100 // 100 // 0 // --- // 0 /// ENST00000373413 // ENSEMBL // zinc finger and SCAN domain containing 20 [gene_biot…
TC0100007734.hg.1	TC0100007734.hg.1	chr1	+	33860475	33864791	10	main	Multiple_Complex	NM_145205 // RefSeq // Homo sapiens high mobility group box 4 (HMGB4), transcript variant 1, mRNA. // chr1 // 100 // 100 // 0 // --- // 0 /// NR_033264 // RefSeq // Homo sapiens high mobility group box 4 (HMGB4), transcript variant 2, non-coding RNA. // chr1 // 100 // 100 // 0 // --- // 0 /// ENST00000425537 // ENSEMBL // high mobility group box 4 [gene_biotype:protein_coding transcript_biotype:p…
TC0100007739.hg.1	TC0100007739.hg.1	chr1	+	34166883	34219131	10	main	Multiple_Complex	NM_001134734 // RefSeq // Homo sapiens chromosome 1 open reading frame 94 (C1orf94), transcript variant 1, mRNA. // chr1 // 100 // 100 // 0 // --- // 0 /// NM_032884 // RefSeq // Homo sapiens chromosome 1 open reading frame 94 (C1orf94), transcript variant 2, mRNA. // chr1 // 100 // 100 // 0 // --- // 0 /// ENST00000373374 // ENSEMBL // chromosome 1 open reading frame 94 [gene_biotype:protein_cod…
TC0100007745.hg.1	TC0100007745.hg.1	chr1	+	34755047	34758512	10	main	Multiple_Complex	NM_005268 // RefSeq // Homo sapiens gap junction protein, beta 5, 31.1kDa (GJB5), mRNA. // chr1 // 100 // 100 // 0 // --- // 0 /// ENST00000338513 // ENSEMBL // gap junction protein, beta 5, 31.1kDa [gene_biotype:protein_coding transcript_biotype:protein_coding] // chr1 // 100 // 100 // 0 // --- // 0 /// BC004379 // GenBank // Homo sapiens gap junction protein, beta 5, 31.1kDa, mRNA (cDNA clone M…
TC0100007746.hg.1	TC0100007746.hg.1	chr1	+	34759741	34763724	10	main	Coding	NM_153212 // RefSeq // Homo sapiens gap junction protein, beta 4, 30.3kDa (GJB4), mRNA. // chr1 // 100 // 100 // 0 // --- // 0 /// ENST00000339480 // ENSEMBL // gap junction protein, beta 4, 30.3kDa [gene_biotype:protein_coding transcript_biotype:protein_coding] // chr1 // 100 // 100 // 0 // --- // 0 /// BC034709 // GenBank // Homo sapiens gap junction protein, beta 4, 30.3kDa, mRNA (cDNA clone M…
TC0100007747.hg.1	TC0100007747.hg.1	chr1	+	34781189	34786369	10	main	Multiple_Complex	NM_001005752 // RefSeq // Homo sapiens gap junction protein, beta 3, 31kDa (GJB3), transcript variant 2, mRNA. // chr1 // 100 // 100 // 0 // --- // 0 /// NM_024009 // RefSeq // Homo sapiens gap junction protein, beta 3, 31kDa (GJB3), transcript variant 1, mRNA. // chr1 // 100 // 100 // 0 // --- // 0 /// ENST00000373362 // ENSEMBL // gap junction protein, beta 3, 31kDa [gene_biotype:protein_coding…
TC0100007748.hg.1	TC0100007748.hg.1	chr1	+	34792998	34795747	10	main	Coding	NM_002060 // RefSeq // Homo sapiens gap junction protein, alpha 4, 37kDa (GJA4), mRNA. // chr1 // 100 // 100 // 0 // --- // 0 /// ENST00000342280 // ENSEMBL // gap junction protein, alpha 4, 37kDa [gene_biotype:protein_coding transcript_biotype:protein_coding] // chr1 // 100 // 100 // 0 // --- // 0 /// ENST00000450137 // ENSEMBL // gap junction protein, alpha 4, 37kDa [gene_biotype:protein_coding…
TC0100007760.hg.1	TC0100007760.hg.1	chr1	+	35059786	35115859	10	main	Multiple_Complex	NM_001289088 // RefSeq // Homo sapiens zinc finger, MYM-type 1 (ZMYM1), transcript variant 1, mRNA. // chr1 // 100 // 100 // 0 // --- // 0 /// NM_001289089 // RefSeq // Homo sapiens zinc finger, MYM-type 1 (ZMYM1), transcript variant 3, mRNA. // chr1 // 100 // 100 // 0 // --- // 0 /// NM_001289090 // RefSeq // Homo sapiens zinc finger, MYM-type 1 (ZMYM1), transcript variant 4, mRNA. // chr1 // 10…
TC0100007765.hg.1	TC0100007765.hg.1	chr1	+	35268967	35422058	10	main	Multiple_Complex	NM_005095 // RefSeq // Homo sapiens zinc finger, MYM-type 4 (ZMYM4), mRNA. // chr1 // 100 // 100 // 0 // --- // 0 /// ENST00000314607 // ENSEMBL // zinc finger, MYM-type 4 [gene_biotype:protein_coding transcript_biotype:protein_coding] // chr1 // 100 // 100 // 0 // --- // 0 /// ENST00000441447 // ENSEMBL // zinc finger, MYM-type 4 [gene_biotype:protein_coding transcript_biotype:protein_coding] //…
TC0100007777.hg.1	TC0100007777.hg.1	chr1	+	35557473	35567274	10	main	Multiple_Complex	NM_001014839 // RefSeq // Homo sapiens neurochondrin (NCDN), transcript variant 1, mRNA. // chr1 // 100 // 100 // 0 // --- // 0 /// NM_001014841 // RefSeq // Homo sapiens neurochondrin (NCDN), transcript variant 2, mRNA. // chr1 // 100 // 100 // 0 // --- // 0 /// NM_014284 // RefSeq // Homo sapiens neurochondrin (NCDN), transcript variant 3, mRNA. // chr1 // 100 // 100 // 0 // --- // 0 /// ENST00…
TC0100007778.hg.1	TC0100007778.hg.1	chr1	+	35573370	35595328	10	main	Coding	NM_178548 // RefSeq // Homo sapiens transcription factor AP-2 epsilon (activating enhancer binding protein 2 epsilon) (TFAP2E), mRNA. // chr1 // 100 // 100 // 0 // --- // 0 /// ENST00000373235 // ENSEMBL // transcription factor AP-2 epsilon (activating enhancer binding protein 2 epsilon) [gene_biotype:protein_coding transcript_biotype:protein_coding] // chr1 // 100 // 100 // 0 // --- // 0 /// BC0…
TC0100007784.hg.1	TC0100007784.hg.1	chr1	+	35808172	35857890	10	main	Multiple_Complex	NM_017629 // RefSeq // Homo sapiens argonaute RISC catalytic component 4 (AGO4), mRNA. // chr1 // 100 // 100 // 0 // --- // 0 /// ENST00000373210 // ENSEMBL // argonaute RISC catalytic component 4 [gene_biotype:protein_coding transcript_biotype:protein_coding] // chr1 // 100 // 100 // 0 // --- // 0 /// ENST00000488778 // ENSEMBL // argonaute RISC catalytic component 4 [gene_biotype:protein_coding…
TC0100007786.hg.1	TC0100007786.hg.1	chr1	+	35869808	35929610	10	main	Multiple_Complex	NM_012199 // RefSeq // Homo sapiens argonaute RISC catalytic component 1 (AGO1), mRNA. // chr1 // 100 // 100 // 0 // --- // 0 /// ENST00000373204 // ENSEMBL // argonaute RISC catalytic component 1 [gene_biotype:protein_coding transcript_biotype:protein_coding] // chr1 // 100 // 100 // 0 // --- // 0 /// ENST00000373206 // ENSEMBL // argonaute RISC catalytic component 1 [gene_biotype:protein_coding…
TC0100007789.hg.1	TC0100007789.hg.1	chr1	+	35930718	36072500	10	main	Multiple_Complex	NM_024852 // RefSeq // Homo sapiens argonaute RISC catalytic component 3 (AGO3), transcript variant 1, mRNA. // chr1 // 100 // 100 // 0 // --- // 0 /// NM_177422 // RefSeq // Homo sapiens argonaute RISC catalytic component 3 (AGO3), transcript variant 2, mRNA. // chr1 // 100 // 100 // 0 // --- // 0 /// ENST00000246314 // ENSEMBL // argonaute RISC catalytic component 3 [gene_biotype:protein_coding…
TC0100007790.hg.1	TC0100007790.hg.1	chr1	+	36084075	36088275	10	main	Coding	NM_014466 // RefSeq // Homo sapiens tektin 2 (testicular) (TEKT2), mRNA. // chr1 // 100 // 100 // 0 // --- // 0 /// ENST00000207457 // ENSEMBL // tektin 2 (testicular) [gene_biotype:protein_coding transcript_biotype:protein_coding] // chr1 // 100 // 100 // 0 // --- // 0 /// ENST00000469024 // ENSEMBL // tektin 2 (testicular) [gene_biotype:protein_coding transcript_biotype:nonsense_mediated_decay]…
TC0100007791.hg.1	TC0100007791.hg.1	chr1	+	36088852	36093932	10	main	Multiple_Complex	NM_017825 // RefSeq // Homo sapiens ADP-ribosylhydrolase like 2 (ADPRHL2), mRNA. // chr1 // 100 // 100 // 0 // --- // 0 /// ENST00000373178 // ENSEMBL // ADP-ribosylhydrolase like 2 [gene_biotype:protein_coding transcript_biotype:protein_coding] // chr1 // 100 // 100 // 0 // --- // 0 /// BC014169 // GenBank // Homo sapiens ADP-ribosylhydrolase like 2, mRNA (cDNA clone MGC:20733 IMAGE:4552006), co…
TC0100007794.hg.1	TC0100007794.hg.1	chr1	+	36155579	36180849	10	main	Multiple_Complex	NM_001286365 // RefSeq // Homo sapiens MAP7 domain containing 1 (MAP7D1), transcript variant 2, mRNA. // chr1 // 100 // 100 // 0 // --- // 0 /// NM_001286366 // RefSeq // Homo sapiens MAP7 domain containing 1 (MAP7D1), transcript variant 3, mRNA. // chr1 // 100 // 100 // 0 // --- // 0 /// NM_018067 // RefSeq // Homo sapiens MAP7 domain containing 1 (MAP7D1), transcript variant 1, mRNA. // chr1 //…
TC0100007798.hg.1	TC0100007798.hg.1	chr1	+	36224416	36305357	10	main	Multiple_Complex	NM_005119 // RefSeq // Homo sapiens thyroid hormone receptor associated protein 3 (THRAP3), mRNA. // chr1 // 100 // 100 // 0 // --- // 0 /// ENST00000354618 // ENSEMBL // thyroid hormone receptor associated protein 3 [gene_biotype:protein_coding transcript_biotype:protein_coding] // chr1 // 100 // 100 // 0 // --- // 0 /// ENST00000466743 // ENSEMBL // thyroid hormone receptor associated protein 3…
TC0100007800.hg.1	TC0100007800.hg.1	chr1	+	36287477	36288753	6	main	NonCoding	hsa_circ_0004157 // circbase // Jeck2013 ALT_ACCEPTOR, ALT_DONOR, coding, INTERNAL, intronic best transcript NM_005119 // chr1 // 100 // 100 // 0 // --- // 0
TC0100007813.hg.1	TC0100007813.hg.1	chr1	+	36473796	36475464	6	main	NonCoding	hsa_circ_0000055 // circbase // Memczak2013 ANTISENSE, CDS, coding, INTERNAL best transcript NM_156039 // chr1 // 100 // 100 // 0 // --- // 0
TC0100007832.hg.1	TC0100007832.hg.1	chr1	+	37474518	37484379	10	main	Multiple_Complex	NM_025079 // RefSeq // Homo sapiens zinc finger CCCH-type containing 12A (ZC3H12A), mRNA. // chr1 // 100 // 100 // 0 // --- // 0 /// NR_106790 // RefSeq // Homo sapiens microRNA 6732 (MIR6732), microRNA. // chr1 // 100 // 100 // 0 // --- // 0 /// ENST00000373087 // ENSEMBL // zinc finger CCCH-type containing 12A [gene_biotype:protein_coding transcript_biotype:protein_coding] // chr1 // 100 // 100…
TC0100007838.hg.1	TC0100007838.hg.1	chr1	+	37556919	37566857	10	main	Multiple_Complex	NM_003462 // RefSeq // Homo sapiens dynein, axonemal, light intermediate chain 1 (DNALI1), mRNA. // chr1 // 100 // 100 // 0 // --- // 0 /// ENST00000296218 // ENSEMBL // dynein, axonemal, light intermediate chain 1 [gene_biotype:protein_coding transcript_biotype:protein_coding] // chr1 // 100 // 100 // 0 // --- // 0 /// ENST00000466723 // ENSEMBL // dynein, axonemal, light intermediate chain 1 [g…
TC0100007841.hg.1	TC0100007841.hg.1	chr1	+	37692401	37709719	10	main	Multiple_Complex	NM_001256875 // RefSeq // Homo sapiens cell division cycle associated 8 (CDCA8), transcript variant 1, mRNA. // chr1 // 100 // 100 // 0 // --- // 0 /// NM_018101 // RefSeq // Homo sapiens cell division cycle associated 8 (CDCA8), transcript variant 2, mRNA. // chr1 // 100 // 100 // 0 // --- // 0 /// ENST00000327331 // ENSEMBL // cell division cycle associated 8 [gene_biotype:protein_coding transc…
TC0100007845.hg.1	TC0100007845.hg.1	chr1	+	37793802	37801606	10	main	Coding	NM_001031740 // RefSeq // Homo sapiens mannosidase, endo-alpha-like (MANEAL), transcript variant 1, mRNA. // chr1 // 100 // 100 // 0 // --- // 0 /// NM_001113482 // RefSeq // Homo sapiens mannosidase, endo-alpha-like (MANEAL), transcript variant 3, mRNA. // chr1 // 100 // 100 // 0 // --- // 0 /// NM_152496 // RefSeq // Homo sapiens mannosidase, endo-alpha-like (MANEAL), transcript variant 2, mRNA…
TC0100007846.hg.1	TC0100007846.hg.1	chr1	+	37806979	37809454	10	main	Multiple_Complex	NM_001142726 // RefSeq // Homo sapiens chromosome 1 open reading frame 122 (C1orf122), transcript variant 2, mRNA. // chr1 // 100 // 100 // 0 // --- // 0 /// NM_198446 // RefSeq // Homo sapiens chromosome 1 open reading frame 122 (C1orf122), transcript variant 1, mRNA. // chr1 // 100 // 100 // 0 // --- // 0 /// ENST00000373042 // ENSEMBL // chromosome 1 open reading frame 122 [gene_biotype:protei…
TC0100007858.hg.1	TC0100007858.hg.1	chr1	+	38009258	38024825	10	main	Multiple_Complex	NM_016037 // RefSeq // Homo sapiens UTP11-like, U3 small nucleolar ribonucleoprotein (yeast) (UTP11L), mRNA. // chr1 // 100 // 100 // 0 // --- // 0 /// ENST00000373014 // ENSEMBL // UTP11-like, U3 small nucleolar ribonucleoprotein (yeast) [gene_biotype:protein_coding transcript_biotype:protein_coding] // chr1 // 100 // 100 // 0 // --- // 0 /// ENST00000483182 // ENSEMBL // UTP11-like, U3 small nu…
TC0100007876.hg.1	TC0100007876.hg.1	chr1	+	38844140	38844253	6	main	NonCoding	hsa_circ_0000056 // circbase // Memczak2013 ANTISENSE, coding, INTERNAL, intronic best transcript NM_022157 // chr1 // 100 // 100 // 0 // --- // 0
TC0100007884.hg.1	TC0100007884.hg.1	chr1	+	38991223	39006065	10	main	Multiple_Complex	NM_001136275 // RefSeq // Homo sapiens akirin 1 (AKIRIN1), transcript variant 2, mRNA. // chr1 // 100 // 100 // 0 // --- // 0 /// NM_024595 // RefSeq // Homo sapiens akirin 1 (AKIRIN1), transcript variant 1, mRNA. // chr1 // 100 // 100 // 0 // --- // 0 /// ENST00000372984 // ENSEMBL // akirin 1 [gene_biotype:protein_coding transcript_biotype:protein_coding] // chr1 // 100 // 100 // 0 // --- // 0 …
TC0100007886.hg.1	TC0100007886.hg.1	chr1	+	39026295	39034636	10	main	Multiple_Complex	NM_001184979 // RefSeq // Homo sapiens NADH dehydrogenase (ubiquinone) Fe-S protein 5, 15kDa (NADH-coenzyme Q reductase) (NDUFS5), transcript variant 2, mRNA. // chr1 // 100 // 100 // 0 // --- // 0 /// NM_004552 // RefSeq // Homo sapiens NADH dehydrogenase (ubiquinone) Fe-S protein 5, 15kDa (NADH-coenzyme Q reductase) (NDUFS5), transcript variant 1, mRNA. // chr1 // 100 // 100 // 0 // --- // 0 //…
TC0100007898.hg.1	TC0100007898.hg.1	chr1	+	39081316	39487177	10	main	Multiple_Complex	NM_012090 // RefSeq // Homo sapiens microtubule-actin crosslinking factor 1 (MACF1), mRNA. // chr1 // 100 // 100 // 0 // --- // 0 /// NM_015038 // RefSeq // Homo sapiens KIAA0754 (KIAA0754), mRNA. // chr1 // 100 // 100 // 0 // --- // 0 /// OTTHUMT00000020986 // Havana transcript // microtubule-actin crosslinking factor 1[gene_biotype:protein_coding transcript_biotype:protein_coding] // chr1 // 10…
TC0100007909.hg.1	TC0100007909.hg.1	chr1	+	39491646	39529869	10	main	Coding	NM_181809 // RefSeq // Homo sapiens bone morphogenetic protein 8a (BMP8A), mRNA. // chr1 // 100 // 100 // 0 // --- // 0 /// ENST00000331593 // ENSEMBL // bone morphogenetic protein 8a [gene_biotype:protein_coding transcript_biotype:protein_coding] // chr1 // 100 // 100 // 0 // --- // 0 /// BC131617 // GenBank // Homo sapiens bone morphogenetic protein 8a, mRNA (cDNA clone MGC:149599 IMAGE:4011658…
TC0100007910.hg.1	TC0100007910.hg.1	chr1	+	39514866	39516667	10	main	Multiple_Complex	BC072388 // GenBank // Homo sapiens 3-oxoacid CoA transferase 2, mRNA (cDNA clone MGC:87924 IMAGE:5588771), complete cds. // chr1 // 100 // 100 // 0 // --- // 0 /// ENST00000447263 // ENSEMBL // 3-oxoacid CoA transferase 2 pseudogene 1 [gene_biotype:unprocessed_pseudogene transcript_biotype:unprocessed_pseudogene] // chr1 // 100 // 100 // 0 // --- // 0 /// OTTHUMT00000025657 // Havana transcript …
TC0100007920.hg.1	TC0100007920.hg.1	chr1	+	39692182	39763914	10	main	Multiple_Complex	NM_001195007 // RefSeq // Homo sapiens peptidylprolyl isomerase E (cyclophilin E) (PPIE), transcript variant 4, mRNA. // chr1 // 100 // 100 // 0 // --- // 0 /// NM_006112 // RefSeq // Homo sapiens peptidylprolyl isomerase E (cyclophilin E) (PPIE), transcript variant 1, mRNA. // chr1 // 100 // 100 // 0 // --- // 0 /// NM_203456 // RefSeq // Homo sapiens peptidylprolyl isomerase E (cyclophilin E) (…
TC0100007922.hg.1	TC0100007922.hg.1	chr1	+	39758707	39760392	6	main	Coding	PPIE.uAug10 // Ace View // Transcript Identified by AceView, Entrez Gene ID(s) 10450 // chr1 // 100 // 100 // 0 // --- // 0
TC0100007936.hg.1	TC0100007936.hg.1	chr1	+	39955112	39969968	10	main	Multiple_Complex	NM_001136493 // RefSeq // Homo sapiens major facilitator superfamily domain containing 2A (MFSD2A), transcript variant 1, mRNA. // chr1 // 100 // 100 // 0 // --- // 0 /// NM_001287808 // RefSeq // Homo sapiens major facilitator superfamily domain containing 2A (MFSD2A), transcript variant 3, mRNA. // chr1 // 100 // 100 // 0 // --- // 0 /// NM_001287809 // RefSeq // Homo sapiens major facilitator …
TC0100007940.hg.1	TC0100007940.hg.1	chr1	+	40040233	40072649	10	main	Multiple_Complex	NM_001105530 // RefSeq // Homo sapiens CAP, adenylate cyclase-associated protein 1 (yeast) (CAP1), transcript variant 2, mRNA. // chr1 // 100 // 100 // 0 // --- // 0 /// NM_006367 // RefSeq // Homo sapiens CAP, adenylate cyclase-associated protein 1 (yeast) (CAP1), transcript variant 1, mRNA. // chr1 // 100 // 100 // 0 // --- // 0 /// ENST00000340450 // ENSEMBL // CAP, adenylate cyclase-associate…
TC0100007943.hg.1	TC0100007943.hg.1	chr1	+	40161369	40240921	10	main	Multiple_Complex	NM_012421 // RefSeq // Homo sapiens rearranged L-myc fusion (RLF), mRNA. // chr1 // 100 // 100 // 0 // --- // 0 /// ENST00000372771 // ENSEMBL // rearranged L-myc fusion [gene_biotype:protein_coding transcript_biotype:protein_coding] // chr1 // 100 // 100 // 0 // --- // 0 /// BC113666 // GenBank // Homo sapiens rearranged L-myc fusion, mRNA (cDNA clone MGC:142226 IMAGE:8322718), complete cds. // …
TC0100007948.hg.1	TC0100007948.hg.1	chr1	+	40245947	40251693	10	main	Multiple_Complex	NM_001008740 // RefSeq // Homo sapiens transmembrane and coiled-coil domains 2 (TMCO2), mRNA. // chr1 // 100 // 100 // 0 // --- // 0 /// ENST00000372766 // ENSEMBL // transmembrane and coiled-coil domains 2 [gene_biotype:protein_coding transcript_biotype:protein_coding] // chr1 // 100 // 100 // 0 // --- // 0 /// ENST00000468258 // ENSEMBL // transmembrane and coiled-coil domains 2 [gene_biotype:p…
TC0100007949.hg.1	TC0100007949.hg.1	chr1	+	40258050	40294184	10	main	Multiple_Complex	NM_005857 // RefSeq // Homo sapiens zinc metallopeptidase STE24 (ZMPSTE24), mRNA. // chr1 // 100 // 100 // 0 // --- // 0 /// ENST00000372759 // ENSEMBL // zinc metallopeptidase STE24 [gene_biotype:protein_coding transcript_biotype:protein_coding] // chr1 // 100 // 100 // 0 // --- // 0 /// ENST00000472583 // ENSEMBL // zinc metallopeptidase STE24 [gene_biotype:protein_coding transcript_biotype:pro…
TC0100007954.hg.1	TC0100007954.hg.1	chr1	+	40344850	40423326	10	main	Multiple_Complex	NM_001198978 // RefSeq // Homo sapiens small ArfGAP2 (SMAP2), transcript variant 3, mRNA. // chr1 // 100 // 100 // 0 // --- // 0 /// NM_001198979 // RefSeq // Homo sapiens small ArfGAP2 (SMAP2), transcript variant 2, mRNA. // chr1 // 100 // 100 // 0 // --- // 0 /// NM_001198980 // RefSeq // Homo sapiens small ArfGAP2 (SMAP2), transcript variant 4, mRNA. // chr1 // 100 // 100 // 0 // --- // 0 /// …
TC0100007958.hg.1	TC0100007958.hg.1	chr1	+	40450102	40463718	10	main	Multiple_Complex	NM_023070 // RefSeq // Homo sapiens ZFP69 zinc finger protein B (ZFP69B), mRNA. // chr1 // 100 // 100 // 0 // --- // 0 /// ENST00000361584 // ENSEMBL // ZFP69 zinc finger protein B [gene_biotype:protein_coding transcript_biotype:protein_coding] // chr1 // 100 // 100 // 0 // --- // 0 /// ENST00000411995 // ENSEMBL // ZFP69 zinc finger protein B [gene_biotype:protein_coding transcript_biotype:prote…
TC0100007961.hg.1	TC0100007961.hg.1	chr1	+	40477215	40496343	10	main	Multiple_Complex	NM_198494 // RefSeq // Homo sapiens ZFP69 zinc finger protein (ZFP69), mRNA. // chr1 // 100 // 100 // 0 // --- // 0 /// ENST00000372705 // ENSEMBL // ZFP69 zinc finger protein [gene_biotype:protein_coding transcript_biotype:protein_coding] // chr1 // 100 // 100 // 0 // --- // 0 /// ENST00000372706 // ENSEMBL // ZFP69 zinc finger protein [gene_biotype:protein_coding transcript_biotype:protein_codi…
TC0100007963.hg.1	TC0100007963.hg.1	chr1	+	40508741	40516556	10	main	Multiple_Complex	NM_022774 // RefSeq // Homo sapiens exonuclease 5 (EXO5), mRNA. // chr1 // 100 // 100 // 0 // --- // 0 /// ENST00000296380 // ENSEMBL // exonuclease 5 [gene_biotype:protein_coding transcript_biotype:protein_coding] // chr1 // 100 // 100 // 0 // --- // 0 /// ENST00000358527 // ENSEMBL // exonuclease 5 [gene_biotype:protein_coding transcript_biotype:protein_coding] // chr1 // 100 // 100 // 0 // ---…
TC0100007964.hg.1	TC0100007964.hg.1	chr1	+	40531561	40548169	10	main	Multiple_Complex	NM_152373 // RefSeq // Homo sapiens zinc finger protein 684 (ZNF684), mRNA. // chr1 // 100 // 100 // 0 // --- // 0 /// ENST00000372696 // ENSEMBL // zinc finger protein 684 [gene_biotype:protein_coding transcript_biotype:protein_coding] // chr1 // 100 // 100 // 0 // --- // 0 /// ENST00000372697 // ENSEMBL // zinc finger protein 684 [gene_biotype:protein_coding transcript_biotype:protein_coding] /…
TC0100007968.hg.1	TC0100007968.hg.1	chr1	+	40691570	40771606	10	main	Multiple_Complex	NM_001142587 // RefSeq // Homo sapiens nuclear transcription factor Y, gamma (NFYC), transcript variant 3, mRNA. // chr1 // 100 // 100 // 0 // --- // 0 /// NM_001142588 // RefSeq // Homo sapiens nuclear transcription factor Y, gamma (NFYC), transcript variant 1, mRNA. // chr1 // 100 // 100 // 0 // --- // 0 /// NM_001142589 // RefSeq // Homo sapiens nuclear transcription factor Y, gamma (NFYC), tr…
TC0100007971.hg.1	TC0100007971.hg.1	chr1	+	40784012	40840452	10	main	Multiple_Complex	NM_004700 // RefSeq // Homo sapiens potassium channel, voltage gated KQT-like subfamily Q, member 4 (KCNQ4), transcript variant 1, mRNA. // chr1 // 100 // 100 // 0 // --- // 0 /// NM_172163 // RefSeq // Homo sapiens potassium channel, voltage gated KQT-like subfamily Q, member 4 (KCNQ4), transcript variant 2, mRNA. // chr1 // 100 // 100 // 0 // --- // 0 /// ENST00000347132 // ENSEMBL // potassium…
TC0100007980.hg.1	TC0100007980.hg.1	chr1	+	40979299	41012565	10	main	Multiple_Complex	NM_001301237 // RefSeq // Homo sapiens CTP synthase 1 (CTPS1), transcript variant 2, mRNA. // chr1 // 100 // 100 // 0 // --- // 0 /// NM_001905 // RefSeq // Homo sapiens CTP synthase 1 (CTPS1), transcript variant 1, mRNA. // chr1 // 100 // 100 // 0 // --- // 0 /// NR_125440 // RefSeq // Homo sapiens CTP synthase 1 (CTPS1), transcript variant 3, non-coding RNA. // chr1 // 100 // 100 // 0 // --- //…
TC0100007991.hg.1	TC0100007991.hg.1	chr1	+	41361922	41383591	10	main	Coding	NM_001291281 // RefSeq // Homo sapiens forkhead box O6 (FOXO6), mRNA. // chr1 // 100 // 100 // 0 // --- // 0 /// OTTHUMT00000015642 // Havana transcript // forkhead box protein O6[gene_biotype:protein_coding transcript_biotype:protein_coding] // chr1 // 100 // 100 // 0 // --- // 0 /// uc057fid.1 // UCSC Genes // forkhead box O6 [Source:HGNC Symbol;Acc:HGNC:24814] // chr1 // 100 // 100 // 0 // ---…
TC0100008012.hg.1	TC0100008012.hg.1	chr1	+	42153421	42155824	10	main	Coding	NM_007102 // RefSeq // Homo sapiens guanylate cyclase activator 2B (uroguanylin) (GUCA2B), mRNA. // chr1 // 100 // 100 // 0 // --- // 0 /// ENST00000372581 // ENSEMBL // guanylate cyclase activator 2B (uroguanylin) [gene_biotype:protein_coding transcript_biotype:protein_coding] // chr1 // 100 // 100 // 0 // --- // 0 /// BC069301 // GenBank // Homo sapiens guanylate cyclase activator 2B (uroguanyl…
TC0100008017.hg.1	TC0100008017.hg.1	chr1	+	42380795	42424229	10	main	Multiple_Complex	NM_173642 // RefSeq // Homo sapiens ribosomal modification protein rimK-like family member A (RIMKLA), mRNA. // chr1 // 100 // 100 // 0 // --- // 0 /// ENST00000410070 // ENSEMBL // ribosomal modification protein rimK-like family member A [gene_biotype:protein_coding transcript_biotype:protein_coding] // chr1 // 100 // 100 // 0 // --- // 0 /// ENST00000431473 // ENSEMBL // ribosomal modification …
TC0100008023.hg.1	TC0100008023.hg.1	chr1	+	42658377	42676758	10	main	Multiple_Complex	NM_006347 // RefSeq // Homo sapiens peptidylprolyl isomerase H (cyclophilin H) (PPIH), mRNA. // chr1 // 100 // 100 // 0 // --- // 0 /// ENST00000304979 // ENSEMBL // peptidylprolyl isomerase H (cyclophilin H) [gene_biotype:protein_coding transcript_biotype:protein_coding] // chr1 // 100 // 100 // 0 // --- // 0 /// ENST00000372549 // ENSEMBL // peptidylprolyl isomerase H (cyclophilin H) [gene_biot…
TC0100008025.hg.1	TC0100008025.hg.1	chr1	+	42682395	42702362	10	main	Multiple_Complex	NM_004559 // RefSeq // Homo sapiens Y box binding protein 1 (YBX1), transcript variant 1, mRNA. // chr1 // 100 // 100 // 0 // --- // 0 /// ENST00000321358 // ENSEMBL // Y box binding protein 1 [gene_biotype:protein_coding transcript_biotype:protein_coding] // chr1 // 100 // 100 // 0 // --- // 0 /// ENST00000332220 // ENSEMBL // Y box binding protein 1 [gene_biotype:protein_coding transcript_bioty…
TC0100008026.hg.1	TC0100008026.hg.1	chr1	+	42696409	42696608	6	main	NonCoding	hsa_circ_0092362 // circbase // Zhang2013 ALT_ACCEPTOR, ALT_DONOR, coding, INTERNAL, intronic best transcript NM_004559 // chr1 // 100 // 100 // 0 // --- // 0
TC0100008033.hg.1	TC0100008033.hg.1	chr1	+	42817105	42844989	10	main	Multiple_Complex	NM_001017922 // RefSeq // Homo sapiens erythroblast membrane-associated protein (Scianna blood group) (ERMAP), transcript variant 1, mRNA. // chr1 // 100 // 100 // 0 // --- // 0 /// NM_018538 // RefSeq // Homo sapiens erythroblast membrane-associated protein (Scianna blood group) (ERMAP), transcript variant 2, mRNA. // chr1 // 100 // 100 // 0 // --- // 0 /// ENST00000328249 // ENSEMBL // erythrob…
TC0100008034.hg.1	TC0100008034.hg.1	chr1	+	42846573	42852477	10	main	Multiple_Complex	NM_001242739 // RefSeq // Homo sapiens zinc finger protein 691 (ZNF691), transcript variant 1, mRNA. // chr1 // 100 // 100 // 0 // --- // 0 /// NM_015911 // RefSeq // Homo sapiens zinc finger protein 691 (ZNF691), transcript variant 2, mRNA. // chr1 // 100 // 100 // 0 // --- // 0 /// ENST00000372502 // ENSEMBL // zinc finger protein 691 [gene_biotype:protein_coding transcript_biotype:protein_codi…
TC0100008052.hg.1	TC0100008052.hg.1	chr1	+	43172149	43254358	10	main	Multiple_Complex	NM_001167965 // RefSeq // Homo sapiens cilia and flagella associated protein 57 (CFAP57), transcript variant 3, mRNA. // chr1 // 100 // 100 // 0 // --- // 0 /// NM_001195831 // RefSeq // Homo sapiens cilia and flagella associated protein 57 (CFAP57), transcript variant 5, mRNA. // chr1 // 100 // 100 // 0 // --- // 0 /// NM_152498 // RefSeq // Homo sapiens cilia and flagella associated protein 57 …
TC0100008054.hg.1	TC0100008054.hg.1	chr1	+	43269994	43274002	10	main	Multiple_Complex	NM_144626 // RefSeq // Homo sapiens transmembrane protein 125 (TMEM125), mRNA. // chr1 // 100 // 100 // 0 // --- // 0 /// ENST00000432792 // ENSEMBL // transmembrane protein 125 [gene_biotype:protein_coding transcript_biotype:protein_coding] // chr1 // 100 // 100 // 0 // --- // 0 /// ENST00000439858 // ENSEMBL // transmembrane protein 125 [gene_biotype:protein_coding transcript_biotype:protein_co…
TC0100008055.hg.1	TC0100008055.hg.1	chr1	+	43300895	43323110	10	main	Multiple_Complex	NM_001253357 // RefSeq // Homo sapiens tyrosine kinase with immunoglobulin-like and EGF-like domains 1 (TIE1), transcript variant 2, mRNA. // chr1 // 100 // 100 // 0 // --- // 0 /// NM_005424 // RefSeq // Homo sapiens tyrosine kinase with immunoglobulin-like and EGF-like domains 1 (TIE1), transcript variant 1, mRNA. // chr1 // 100 // 100 // 0 // --- // 0 /// ENST00000372476 // ENSEMBL // tyrosine…
TC0100008056.hg.1	TC0100008056.hg.1	chr1	+	43337804	43354464	10	main	Coding	NM_005373 // RefSeq // Homo sapiens MPL proto-oncogene, thrombopoietin receptor (MPL), mRNA. // chr1 // 100 // 100 // 0 // --- // 0 /// ENST00000372470 // ENSEMBL // MPL proto-oncogene, thrombopoietin receptor [gene_biotype:protein_coding transcript_biotype:protein_coding] // chr1 // 100 // 100 // 0 // --- // 0 /// ENST00000413998 // ENSEMBL // MPL proto-oncogene, thrombopoietin receptor [gene_bi…
TC0100008057.hg.1	TC0100008057.hg.1	chr1	+	43358955	43363203	10	main	Multiple_Complex	NM_001255 // RefSeq // Homo sapiens cell division cycle 20 (CDC20), mRNA. // chr1 // 100 // 100 // 0 // --- // 0 /// ENST00000310955 // ENSEMBL // cell division cycle 20 [gene_biotype:protein_coding transcript_biotype:protein_coding] // chr1 // 100 // 100 // 0 // --- // 0 /// ENST00000372462 // ENSEMBL // cell division cycle 20 [gene_biotype:protein_coding transcript_biotype:protein_coding] // ch…
TC0100008061.hg.1	TC0100008061.hg.1	chr1	+	43389882	43456995	10	main	Multiple_Complex	NM_015284 // RefSeq // Homo sapiens seizure threshold 2 homolog (mouse) (SZT2), mRNA. // chr1 // 100 // 100 // 0 // --- // 0 /// ENST00000357658 // ENSEMBL // seizure threshold 2 homolog (mouse) [gene_biotype:protein_coding transcript_biotype:retained_intron] // chr1 // 100 // 100 // 0 // --- // 0 /// ENST00000372450 // ENSEMBL // seizure threshold 2 homolog (mouse) [gene_biotype:protein_coding t…
TC0100008066.hg.1	TC0100008066.hg.1	chr1	+	43525187	43623672	10	main	Multiple_Complex	NM_002840 // RefSeq // Homo sapiens protein tyrosine phosphatase, receptor type, F (PTPRF), transcript variant 1, mRNA. // chr1 // 100 // 100 // 0 // --- // 0 /// NM_130440 // RefSeq // Homo sapiens protein tyrosine phosphatase, receptor type, F (PTPRF), transcript variant 2, mRNA. // chr1 // 100 // 100 // 0 // --- // 0 /// ENST00000359947 // ENSEMBL // protein tyrosine phosphatase, receptor type…
TC0100008073.hg.1	TC0100008073.hg.1	chr1	+	43650126	43705518	10	main	Multiple_Complex	NM_014663 // RefSeq // Homo sapiens lysine (K)-specific demethylase 4A (KDM4A), mRNA. // chr1 // 100 // 100 // 0 // --- // 0 /// ENST00000372396 // ENSEMBL // lysine (K)-specific demethylase 4A [gene_biotype:protein_coding transcript_biotype:protein_coding] // chr1 // 100 // 100 // 0 // --- // 0 /// ENST00000463151 // ENSEMBL // lysine (K)-specific demethylase 4A [gene_biotype:protein_coding tran…
TC0100008075.hg.1	TC0100008075.hg.1	chr1	+	43705824	43931165	10	main	Multiple_Complex	NM_001270459 // RefSeq // Homo sapiens ST3 beta-galactoside alpha-2,3-sialyltransferase 3 (ST3GAL3), transcript variant 11, mRNA. // chr1 // 100 // 100 // 0 // --- // 0 /// NM_001270460 // RefSeq // Homo sapiens ST3 beta-galactoside alpha-2,3-sialyltransferase 3 (ST3GAL3), transcript variant 12, mRNA. // chr1 // 100 // 100 // 0 // --- // 0 /// NM_001270461 // RefSeq // Homo sapiens ST3 beta-galac…
TC0100008078.hg.1	TC0100008078.hg.1	chr1	+	43933320	43937241	10	main	Multiple_Complex	NM_001136215 // RefSeq // Homo sapiens artemin (ARTN), transcript variant 5, mRNA. // chr1 // 100 // 100 // 0 // --- // 0 /// NM_057090 // RefSeq // Homo sapiens artemin (ARTN), transcript variant 4, mRNA. // chr1 // 100 // 100 // 0 // --- // 0 /// NM_057091 // RefSeq // Homo sapiens artemin (ARTN), transcript variant 2, mRNA. // chr1 // 100 // 100 // 0 // --- // 0 /// ENST00000372354 // ENSEMBL …
TC0100008079.hg.1	TC0100008079.hg.1	chr1	+	43946806	43968022	10	main	Multiple_Complex	NM_014652 // RefSeq // Homo sapiens importin 13 (IPO13), mRNA. // chr1 // 100 // 100 // 0 // --- // 0 /// ENST00000372339 // ENSEMBL // importin 13 [gene_biotype:protein_coding transcript_biotype:protein_coding] // chr1 // 100 // 100 // 0 // --- // 0 /// ENST00000372343 // ENSEMBL // importin 13 [gene_biotype:protein_coding transcript_biotype:protein_coding] // chr1 // 100 // 100 // 0 // --- // 0…
TC0100008080.hg.1	TC0100008080.hg.1	chr1	+	43969981	43973373	10	main	Multiple_Complex	NM_001039589 // RefSeq // Homo sapiens DPH2 homolog (DPH2), transcript variant 2, mRNA. // chr1 // 100 // 100 // 0 // --- // 0 /// NM_001384 // RefSeq // Homo sapiens DPH2 homolog (DPH2), transcript variant 1, mRNA. // chr1 // 100 // 100 // 0 // --- // 0 /// ENST00000255108 // ENSEMBL // DPH2 homolog [gene_biotype:protein_coding transcript_biotype:protein_coding] // chr1 // 100 // 100 // 0 // ---…
TC0100008081.hg.1	TC0100008081.hg.1	chr1	+	43974487	43978300	10	main	Multiple_Complex	NM_001039457 // RefSeq // Homo sapiens ATPase, H+ transporting, lysosomal 21kDa, V0 subunit b (ATP6V0B), transcript variant 2, mRNA. // chr1 // 100 // 100 // 0 // --- // 0 /// NM_001294333 // RefSeq // Homo sapiens ATPase, H+ transporting, lysosomal 21kDa, V0 subunit b (ATP6V0B), transcript variant 3, mRNA. // chr1 // 100 // 100 // 0 // --- // 0 /// NM_004047 // RefSeq // Homo sapiens ATPase, H+ …
TC0100008082.hg.1	TC0100008082.hg.1	chr1	+	43978943	43991171	10	main	Multiple_Complex	NM_001005417 // RefSeq // Homo sapiens UDP-Gal:betaGlcNAc beta 1,4- galactosyltransferase, polypeptide 2 (B4GALT2), transcript variant 3, mRNA. // chr1 // 100 // 100 // 0 // --- // 0 /// NM_003780 // RefSeq // Homo sapiens UDP-Gal:betaGlcNAc beta 1,4- galactosyltransferase, polypeptide 2 (B4GALT2), transcript variant 2, mRNA. // chr1 // 100 // 100 // 0 // --- // 0 /// NM_030587 // RefSeq // Homo …
TC0100008084.hg.1	TC0100008084.hg.1	chr1	+	43991359	43996528	10	main	Multiple_Complex	NM_152499 // RefSeq // Homo sapiens coiled-coil domain containing 24 (CCDC24), mRNA. // chr1 // 100 // 100 // 0 // --- // 0 /// ENST00000372318 // ENSEMBL // coiled-coil domain containing 24 [gene_biotype:protein_coding transcript_biotype:protein_coding] // chr1 // 100 // 100 // 0 // --- // 0 /// ENST00000460543 // ENSEMBL // coiled-coil domain containing 24 [gene_biotype:protein_coding transcrip…
TC0100008088.hg.1	TC0100008088.hg.1	chr1	+	44118850	44135140	10	main	Multiple_Complex	NM_173484 // RefSeq // Homo sapiens Kruppel-like factor 17 (KLF17), mRNA. // chr1 // 100 // 100 // 0 // --- // 0 /// ENST00000372299 // ENSEMBL // Kruppel-like factor 17 [gene_biotype:protein_coding transcript_biotype:protein_coding] // chr1 // 100 // 100 // 0 // --- // 0 /// ENST00000476802 // ENSEMBL // Kruppel-like factor 17 [gene_biotype:protein_coding transcript_biotype:processed_transcript]…
TC0100008090.hg.1	TC0100008090.hg.1	chr1	+	44213453	44220681	10	main	Multiple_Complex	NM_001034023 // RefSeq // Homo sapiens DNA methyltransferase 1 associated protein 1 (DMAP1), transcript variant 2, mRNA. // chr1 // 100 // 100 // 0 // --- // 0 /// NM_001034024 // RefSeq // Homo sapiens DNA methyltransferase 1 associated protein 1 (DMAP1), transcript variant 3, mRNA. // chr1 // 100 // 100 // 0 // --- // 0 /// NM_019100 // RefSeq // Homo sapiens DNA methyltransferase 1 associated …
TC0100008094.hg.1	TC0100008094.hg.1	chr1	+	44405194	44651724	10	main	Multiple_Complex	NM_018150 // RefSeq // Homo sapiens ring finger protein 220 (RNF220), mRNA. // chr1 // 100 // 100 // 0 // --- // 0 /// ENST00000335497 // ENSEMBL // ring finger protein 220 [gene_biotype:protein_coding transcript_biotype:protein_coding] // chr1 // 100 // 100 // 0 // --- // 0 /// ENST00000355387 // ENSEMBL // ring finger protein 220 [gene_biotype:protein_coding transcript_biotype:protein_coding] /…
TC0100008100.hg.1	TC0100008100.hg.1	chr1	+	44674692	44725591	10	main	Multiple_Complex	NM_001145636 // RefSeq // Homo sapiens chromosome 1 open reading frame 228 (C1orf228), mRNA. // chr1 // 100 // 100 // 0 // --- // 0 /// ENST00000357508 // ENSEMBL // chromosome 1 open reading frame 228 [gene_biotype:protein_coding transcript_biotype:retained_intron] // chr1 // 100 // 100 // 0 // --- // 0 /// ENST00000418644 // ENSEMBL // chromosome 1 open reading frame 228 [gene_biotype:protein_c…
TC0100008101.hg.1	TC0100008101.hg.1	chr1	+	44739818	44767767	10	main	Multiple_Complex	NM_001297655 // RefSeq // Homo sapiens kinesin family member 2C (KIF2C), transcript variant 2, mRNA. // chr1 // 100 // 100 // 0 // --- // 0 /// NM_001297656 // RefSeq // Homo sapiens kinesin family member 2C (KIF2C), transcript variant 3, mRNA. // chr1 // 100 // 100 // 0 // --- // 0 /// NM_001297657 // RefSeq // Homo sapiens kinesin family member 2C (KIF2C), transcript variant 4, mRNA. // chr1 //…
TC0100008102.hg.1	TC0100008102.hg.1	chr1	+	44753255	44753690	6	main	NonCoding	hsa_circ_0006145 // circbase // Jeck2013 ALT_DONOR, coding, INTERNAL, intronic best transcript NM_006845 // chr1 // 100 // 100 // 0 // --- // 0
TC0100008103.hg.1	TC0100008103.hg.1	chr1	+	44775251	44778779	10	main	Multiple_Complex	NM_001012 // RefSeq // Homo sapiens ribosomal protein S8 (RPS8), mRNA. // chr1 // 100 // 100 // 0 // --- // 0 /// NR_000015 // RefSeq // Homo sapiens small nucleolar RNA, C/D box 55 (SNORD55), small nucleolar RNA. // chr1 // 100 // 100 // 0 // --- // 0 /// NR_000024 // RefSeq // Homo sapiens small nucleolar RNA, C/D box 46 (SNORD46), small nucleolar RNA. // chr1 // 100 // 100 // 0 // --- // 0 ///…
TC0100008105.hg.1	TC0100008105.hg.1	chr1	+	44800225	44805995	10	main	Multiple_Complex	NM_004073 // RefSeq // Homo sapiens polo-like kinase 3 (PLK3), mRNA. // chr1 // 100 // 100 // 0 // --- // 0 /// ENST00000372201 // ENSEMBL // polo-like kinase 3 [gene_biotype:protein_coding transcript_biotype:protein_coding] // chr1 // 100 // 100 // 0 // --- // 0 /// ENST00000461358 // ENSEMBL // polo-like kinase 3 [gene_biotype:protein_coding transcript_biotype:processed_transcript] // chr1 // 1…
TC0100008106.hg.1	TC0100008106.hg.1	chr1	+	44808482	44815585	10	main	Multiple_Complex	NM_001136537 // RefSeq // Homo sapiens BTB (POZ) domain containing 19 (BTBD19), mRNA. // chr1 // 100 // 100 // 0 // --- // 0 /// ENST00000409335 // ENSEMBL // BTB (POZ) domain containing 19 [gene_biotype:protein_coding transcript_biotype:protein_coding] // chr1 // 100 // 100 // 0 // --- // 0 /// ENST00000439563 // ENSEMBL // BTB (POZ) domain containing 19 [gene_biotype:protein_coding transcript_b…
TC0100008114.hg.1	TC0100008114.hg.1	chr1	+	45012133	45015669	10	main	Multiple_Complex	NM_000374 // RefSeq // Homo sapiens uroporphyrinogen decarboxylase (UROD), transcript variant 1, mRNA. // chr1 // 100 // 100 // 0 // --- // 0 /// NR_036510 // RefSeq // Homo sapiens uroporphyrinogen decarboxylase (UROD), transcript variant 2, non-coding RNA. // chr1 // 100 // 100 // 0 // --- // 0 /// ENST00000246337 // ENSEMBL // uroporphyrinogen decarboxylase [gene_biotype:protein_coding transcr…
TC0100008120.hg.1	TC0100008120.hg.1	chr1	+	45326873	45328674	10	main	Coding	NM_032756 // RefSeq // Homo sapiens 4-hydroxyphenylpyruvate dioxygenase-like (HPDL), mRNA. // chr1 // 100 // 100 // 0 // --- // 0 /// ENST00000334815 // ENSEMBL // 4-hydroxyphenylpyruvate dioxygenase-like [gene_biotype:protein_coding transcript_biotype:protein_coding] // chr1 // 100 // 100 // 0 // --- // 0 /// BC007293 // GenBank // Homo sapiens 4-hydroxyphenylpyruvate dioxygenase-like, mRNA (cDN…
TC0100008121.hg.1	TC0100008121.hg.1	chr1	+	45339670	45343978	10	main	Multiple_Complex	NM_025077 // RefSeq // Homo sapiens target of EGR1, member 1 (nuclear) (TOE1), mRNA. // chr1 // 100 // 100 // 0 // --- // 0 /// ENST00000372090 // ENSEMBL // target of EGR1, member 1 (nuclear) [gene_biotype:protein_coding transcript_biotype:protein_coding] // chr1 // 100 // 100 // 0 // --- // 0 /// ENST00000460057 // ENSEMBL // target of EGR1, member 1 (nuclear) [gene_biotype:protein_coding trans…
TC0100008124.hg.1	TC0100008124.hg.1	chr1	+	45500053	45513382	10	main	Multiple_Complex	NM_015506 // RefSeq // Homo sapiens methylmalonic aciduria (cobalamin deficiency) cblC type, with homocystinuria (MMACHC), mRNA. // chr1 // 100 // 100 // 0 // --- // 0 /// ENST00000401061 // ENSEMBL // methylmalonic aciduria (cobalamin deficiency) cblC type, with homocystinuria [gene_biotype:protein_coding transcript_biotype:protein_coding] // chr1 // 100 // 100 // 0 // --- // 0 /// ENST000004771…
TC0100008126.hg.1	TC0100008126.hg.1	chr1	+	45550543	45570051	10	main	Multiple_Complex	NM_001202413 // RefSeq // Homo sapiens aldo-keto reductase family 1, member A1 (aldehyde reductase) (AKR1A1), transcript variant 4, mRNA. // chr1 // 100 // 100 // 0 // --- // 0 /// NM_001202414 // RefSeq // Homo sapiens aldo-keto reductase family 1, member A1 (aldehyde reductase) (AKR1A1), transcript variant 3, mRNA. // chr1 // 100 // 100 // 0 // --- // 0 /// NM_006066 // RefSeq // Homo sapiens a…
TC0100008127.hg.1	TC0100008127.hg.1	chr1	+	45583846	45618906	10	main	Multiple_Complex	NM_001195193 // RefSeq // Homo sapiens nuclear autoantigenic sperm protein (histone-binding) (NASP), transcript variant 4, mRNA. // chr1 // 100 // 100 // 0 // --- // 0 /// NM_002482 // RefSeq // Homo sapiens nuclear autoantigenic sperm protein (histone-binding) (NASP), transcript variant 2, mRNA. // chr1 // 100 // 100 // 0 // --- // 0 /// NM_152298 // RefSeq // Homo sapiens nuclear autoantigenic …
TC0100008129.hg.1	TC0100008129.hg.1	chr1	+	45613509	45613828	6	main	NonCoding	hsa_circ_0092340 // circbase // Zhang2013 ALT_ACCEPTOR, ALT_DONOR, coding, INTERNAL, intronic best transcript NM_002482 // chr1 // 100 // 100 // 0 // --- // 0
TC0100008130.hg.1	TC0100008130.hg.1	chr1	+	45617592	45617791	6	main	NonCoding	hsa_circ_0092293 // circbase // Zhang2013 ALT_DONOR, coding, INTERNAL, intronic best transcript NM_002482 // chr1 // 100 // 100 // 0 // --- // 0
TC0100008132.hg.1	TC0100008132.hg.1	chr1	+	45687214	45694443	10	main	Multiple_Complex	NM_016486 // RefSeq // Homo sapiens transmembrane protein 69 (TMEM69), mRNA. // chr1 // 100 // 100 // 0 // --- // 0 /// ENST00000372025 // ENSEMBL // transmembrane protein 69 [gene_biotype:protein_coding transcript_biotype:protein_coding] // chr1 // 100 // 100 // 0 // --- // 0 /// ENST00000496366 // ENSEMBL // transmembrane protein 69 [gene_biotype:protein_coding transcript_biotype:processed_tran…
TC0100008139.hg.1	TC0100008139.hg.1	chr1	+	45786987	46036124	10	main	Multiple_Complex	NM_015112 // RefSeq // Homo sapiens microtubule associated serine/threonine kinase 2 (MAST2), mRNA. // chr1 // 100 // 100 // 0 // --- // 0 /// ENST00000361297 // ENSEMBL // microtubule associated serine/threonine kinase 2 [gene_biotype:protein_coding transcript_biotype:protein_coding] // chr1 // 100 // 100 // 0 // --- // 0 /// ENST00000372008 // ENSEMBL // microtubule associated serine/threonine …
TC0100008145.hg.1	TC0100008145.hg.1	chr1	+	46175073	46185962	10	main	Multiple_Complex	NM_005727 // RefSeq // Homo sapiens tetraspanin 1 (TSPAN1), mRNA. // chr1 // 100 // 100 // 0 // --- // 0 /// ENST00000372003 // ENSEMBL // tetraspanin 1 [gene_biotype:protein_coding transcript_biotype:protein_coding] // chr1 // 100 // 100 // 0 // --- // 0 /// ENST00000464786 // ENSEMBL // tetraspanin 1 [gene_biotype:protein_coding transcript_biotype:processed_transcript] // chr1 // 100 // 100 // …
TC0100008146.hg.1	TC0100008146.hg.1	chr1	+	46203334	46221261	10	main	Multiple_Complex	NM_001013615 // RefSeq // Homo sapiens leucine rich adaptor protein 1 (LURAP1), mRNA. // chr1 // 100 // 100 // 0 // --- // 0 /// ENST00000371980 // ENSEMBL // leucine rich adaptor protein 1 [gene_biotype:protein_coding transcript_biotype:protein_coding] // chr1 // 100 // 100 // 0 // --- // 0 /// BC034422 // GenBank // Homo sapiens chromosome 1 open reading frame 190, mRNA (cDNA clone MGC:34658 IM…
TC0100008150.hg.1	TC0100008150.hg.1	chr1	+	46247688	46278473	10	main	Multiple_Complex	NM_001142548 // RefSeq // Homo sapiens RAD54-like (S. cerevisiae) (RAD54L), transcript variant 2, mRNA. // chr1 // 100 // 100 // 0 // --- // 0 /// NM_003579 // RefSeq // Homo sapiens RAD54-like (S. cerevisiae) (RAD54L), transcript variant 1, mRNA. // chr1 // 100 // 100 // 0 // --- // 0 /// ENST00000371975 // ENSEMBL // RAD54-like (S. cerevisiae) [gene_biotype:protein_coding transcript_biotype:pro…
TC0100008151.hg.1	TC0100008151.hg.1	chr1	+	46280773	46283022	6	main	Coding	RAD54L.iAug10-unspliced // Ace View // Transcript Identified by AceView, Entrez Gene ID(s) 8438 // chr1 // 100 // 100 // 0 // --- // 0
TC0100008152.hg.1	TC0100008152.hg.1	chr1	+	46303613	46316777	10	main	Multiple_Complex	NM_001297565 // RefSeq // Homo sapiens ubiquinol-cytochrome c reductase hinge protein (UQCRH), transcript variant 2, mRNA. // chr1 // 100 // 100 // 0 // --- // 0 /// NM_001297566 // RefSeq // Homo sapiens ubiquinol-cytochrome c reductase hinge protein (UQCRH), transcript variant 3, mRNA. // chr1 // 100 // 100 // 0 // --- // 0 /// NM_006004 // RefSeq // Homo sapiens ubiquinol-cytochrome c reductas…
TC0100008156.hg.1	TC0100008156.hg.1	chr1	+	46340177	46365152	10	main	Multiple_Complex	NM_001256127 // RefSeq // Homo sapiens NOP2/Sun domain family, member 4 (NSUN4), transcript variant 2, mRNA. // chr1 // 100 // 100 // 0 // --- // 0 /// NM_001256128 // RefSeq // Homo sapiens NOP2/Sun domain family, member 4 (NSUN4), transcript variant 3, mRNA. // chr1 // 100 // 100 // 0 // --- // 0 /// NM_199044 // RefSeq // Homo sapiens NOP2/Sun domain family, member 4 (NSUN4), transcript varian…
TC0100008158.hg.1	TC0100008158.hg.1	chr1	+	46394265	46413848	10	main	Multiple_Complex	NM_001441 // RefSeq // Homo sapiens fatty acid amide hydrolase (FAAH), mRNA. // chr1 // 100 // 100 // 0 // --- // 0 /// ENST00000243167 // ENSEMBL // fatty acid amide hydrolase [gene_biotype:protein_coding transcript_biotype:protein_coding] // chr1 // 100 // 100 // 0 // --- // 0 /// ENST00000468718 // ENSEMBL // fatty acid amide hydrolase [gene_biotype:protein_coding transcript_biotype:processed_…
TC0100008163.hg.1	TC0100008163.hg.1	chr1	+	46506996	46514226	10	main	Coding	NM_147192 // RefSeq // Homo sapiens diencephalon/mesencephalon homeobox 1 (DMBX1), transcript variant 2, mRNA. // chr1 // 100 // 100 // 0 // --- // 0 /// NM_172225 // RefSeq // Homo sapiens diencephalon/mesencephalon homeobox 1 (DMBX1), transcript variant 1, mRNA. // chr1 // 100 // 100 // 0 // --- // 0 /// ENST00000360032 // ENSEMBL // diencephalon/mesencephalon homeobox 1 [gene_biotype:protein_c…
TC0100008170.hg.1	TC0100008170.hg.1	chr1	+	46668855	46673594	10	main	Coding	NM_001145474 // RefSeq // Homo sapiens testis expressed 38 (TEX38), transcript variant 1, mRNA. // chr1 // 100 // 100 // 0 // --- // 0 /// NM_001300863 // RefSeq // Homo sapiens testis expressed 38 (TEX38), transcript variant 2, mRNA. // chr1 // 100 // 100 // 0 // --- // 0 /// NM_001300864 // RefSeq // Homo sapiens testis expressed 38 (TEX38), transcript variant 3, mRNA. // chr1 // 100 // 100 // …
TC0100008182.hg.1	TC0100008182.hg.1	chr1	+	47023568	47050751	10	main	Multiple_Complex	NM_178033 // RefSeq // Homo sapiens cytochrome P450, family 4, subfamily X, polypeptide 1 (CYP4X1), mRNA. // chr1 // 100 // 100 // 0 // --- // 0 /// ENST00000371901 // ENSEMBL // cytochrome P450, family 4, subfamily X, polypeptide 1 [gene_biotype:protein_coding transcript_biotype:protein_coding] // chr1 // 100 // 100 // 0 // --- // 0 /// ENST00000466294 // ENSEMBL // cytochrome P450, family 4, su…
TC0100008183.hg.1	TC0100008183.hg.1	chr1	+	47067488	47118320	10	main	Multiple_Complex	NM_178134 // RefSeq // Homo sapiens cytochrome P450, family 4, subfamily Z, polypeptide 1 (CYP4Z1), mRNA. // chr1 // 100 // 100 // 0 // --- // 0 /// ENST00000334194 // ENSEMBL // cytochrome P450, family 4, subfamily Z, polypeptide 1 [gene_biotype:protein_coding transcript_biotype:protein_coding] // chr1 // 100 // 100 // 0 // --- // 0 /// ENST00000471598 // ENSEMBL // cytochrome P450, family 4, su…
TC0100008185.hg.1	TC0100008185.hg.1	chr1	+	47137425	47149741	10	main	Multiple_Complex	NM_001010969 // RefSeq // Homo sapiens cytochrome P450, family 4, subfamily A, polypeptide 22 (CYP4A22), transcript variant 1, mRNA. // chr1 // 100 // 100 // 0 // --- // 0 /// NM_001308102 // RefSeq // Homo sapiens cytochrome P450, family 4, subfamily A, polypeptide 22 (CYP4A22), transcript variant 2, mRNA. // chr1 // 100 // 100 // 0 // --- // 0 /// BC142607 // GenBank // Homo sapiens cytochrome …
TC0100008190.hg.1	TC0100008190.hg.1	chr1	+	47333797	47378839	10	main	Multiple_Complex	NM_001136140 // RefSeq // Homo sapiens cytidine monophosphate (UMP-CMP) kinase 1, cytosolic (CMPK1), transcript variant 2, mRNA. // chr1 // 100 // 100 // 0 // --- // 0 /// NM_016308 // RefSeq // Homo sapiens cytidine monophosphate (UMP-CMP) kinase 1, cytosolic (CMPK1), transcript variant 1, mRNA. // chr1 // 100 // 100 // 0 // --- // 0 /// NR_046394 // RefSeq // Homo sapiens cytidine monophosphate…
TC0100008193.hg.1	TC0100008193.hg.1	chr1	+	47416072	47418052	10	main	Coding	NM_012186 // RefSeq // Homo sapiens forkhead box E3 (FOXE3), mRNA. // chr1 // 100 // 100 // 0 // --- // 0 /// ENST00000335071 // ENSEMBL // forkhead box E3 [gene_biotype:protein_coding transcript_biotype:protein_coding] // chr1 // 100 // 100 // 0 // --- // 0 /// OTTHUMT00000021836 // Havana transcript // forkhead box E3[gene_biotype:protein_coding transcript_biotype:protein_coding] // chr1 // 100…
TC0100008194.hg.1	TC0100008194.hg.1	chr1	+	47436017	47440691	10	main	Coding	NM_004474 // RefSeq // Homo sapiens forkhead box D2 (FOXD2), mRNA. // chr1 // 100 // 100 // 0 // --- // 0 /// ENST00000334793 // ENSEMBL // forkhead box D2 [gene_biotype:protein_coding transcript_biotype:protein_coding] // chr1 // 100 // 100 // 0 // --- // 0 /// OTTHUMT00000021831 // Havana transcript // forkhead box D2[gene_biotype:protein_coding transcript_biotype:protein_coding] // chr1 // 100…
TC0100008216.hg.1	TC0100008216.hg.1	chr1	+	48222685	48248644	10	main	Multiple_Complex	NM_001011547 // RefSeq // Homo sapiens solute carrier family 5 (sodium/sugar cotransporter), member 9 (SLC5A9), transcript variant 2, mRNA. // chr1 // 100 // 100 // 0 // --- // 0 /// NM_001135181 // RefSeq // Homo sapiens solute carrier family 5 (sodium/sugar cotransporter), member 9 (SLC5A9), transcript variant 1, mRNA. // chr1 // 100 // 100 // 0 // --- // 0 /// ENST00000236495 // ENSEMBL // sol…
TC0100008243.hg.1	TC0100008243.hg.1	chr1	+	50048014	50203786	10	main	Multiple_Complex	NM_001144774 // RefSeq // Homo sapiens ELAV like neuron-specific RNA binding protein 4 (ELAVL4), transcript variant 2, mRNA. // chr1 // 100 // 100 // 0 // --- // 0 /// NM_001144775 // RefSeq // Homo sapiens ELAV like neuron-specific RNA binding protein 4 (ELAVL4), transcript variant 3, mRNA. // chr1 // 100 // 100 // 0 // --- // 0 /// NM_001144776 // RefSeq // Homo sapiens ELAV like neuron-specifi…
TC0100008260.hg.1	TC0100008260.hg.1	chr1	+	50960745	50974637	10	main	Coding	NM_001262 // RefSeq // Homo sapiens cyclin-dependent kinase inhibitor 2C (p18, inhibits CDK4) (CDKN2C), transcript variant 1, mRNA. // chr1 // 100 // 100 // 0 // --- // 0 /// NM_078626 // RefSeq // Homo sapiens cyclin-dependent kinase inhibitor 2C (p18, inhibits CDK4) (CDKN2C), transcript variant 2, mRNA. // chr1 // 100 // 100 // 0 // --- // 0 /// ENST00000262662 // ENSEMBL // cyclin-dependent ki…
TC0100008266.hg.1	TC0100008266.hg.1	chr1	+	51102234	51148086	10	main	Multiple_Complex	NM_001136508 // RefSeq // Homo sapiens chromosome 1 open reading frame 185 (C1orf185), mRNA. // chr1 // 100 // 100 // 0 // --- // 0 /// ENST00000371759 // ENSEMBL // chromosome 1 open reading frame 185 [gene_biotype:protein_coding transcript_biotype:protein_coding] // chr1 // 100 // 100 // 0 // --- // 0 /// ENST00000467127 // ENSEMBL // chromosome 1 open reading frame 185 [gene_biotype:protein_co…
TC0100008271.hg.1	TC0100008271.hg.1	chr1	+	51236271	51273455	10	main	Multiple_Complex	NM_014372 // RefSeq // Homo sapiens ring finger protein 11 (RNF11), mRNA. // chr1 // 100 // 100 // 0 // --- // 0 /// ENST00000242719 // ENSEMBL // ring finger protein 11 [gene_biotype:protein_coding transcript_biotype:protein_coding] // chr1 // 100 // 100 // 0 // --- // 0 /// ENST00000486691 // ENSEMBL // ring finger protein 11 [gene_biotype:protein_coding transcript_biotype:processed_transcript]…
TC0100008289.hg.1	TC0100008289.hg.1	chr1	+	51577179	51799154	10	main	Multiple_Complex	NM_024586 // RefSeq // Homo sapiens oxysterol binding protein-like 9 (OSBPL9), transcript variant 6, mRNA. // chr1 // 100 // 100 // 0 // --- // 0 /// NM_148904 // RefSeq // Homo sapiens oxysterol binding protein-like 9 (OSBPL9), transcript variant 1, mRNA. // chr1 // 100 // 100 // 0 // --- // 0 /// NM_148905 // RefSeq // Homo sapiens oxysterol binding protein-like 9 (OSBPL9), transcript variant 2…
TC0100008306.hg.1	TC0100008306.hg.1	chr1	+	52056125	52090716	10	main	Multiple_Complex	NM_001136497 // RefSeq // Homo sapiens basic transcription factor 3-like 4 (BTF3L4), transcript variant 2, mRNA. // chr1 // 100 // 100 // 0 // --- // 0 /// NM_001243767 // RefSeq // Homo sapiens basic transcription factor 3-like 4 (BTF3L4), transcript variant 3, mRNA. // chr1 // 100 // 100 // 0 // --- // 0 /// NM_152265 // RefSeq // Homo sapiens basic transcription factor 3-like 4 (BTF3L4), trans…
TC0100008308.hg.1	TC0100008308.hg.1	chr1	+	52142094	52346686	10	main	Multiple_Complex	NM_004799 // RefSeq // Homo sapiens zinc finger, FYVE domain containing 9 (ZFYVE9), transcript variant 3, mRNA. // chr1 // 100 // 100 // 0 // --- // 0 /// NM_007324 // RefSeq // Homo sapiens zinc finger, FYVE domain containing 9 (ZFYVE9), transcript variant 1, mRNA. // chr1 // 100 // 100 // 0 // --- // 0 /// ENST00000287727 // ENSEMBL // zinc finger, FYVE domain containing 9 [gene_biotype:protein…
TC0100008315.hg.1	TC0100008315.hg.1	chr1	+	52404547	52420839	10	main	Multiple_Complex	NM_032864 // RefSeq // Homo sapiens pre-mRNA processing factor 38A (PRPF38A), mRNA. // chr1 // 100 // 100 // 0 // --- // 0 /// ENST00000257181 // ENSEMBL // pre-mRNA processing factor 38A [gene_biotype:protein_coding transcript_biotype:protein_coding] // chr1 // 100 // 100 // 0 // --- // 0 /// ENST00000474048 // ENSEMBL // pre-mRNA processing factor 38A [gene_biotype:protein_coding transcript_bio…
TC0100008321.hg.1	TC0100008321.hg.1	chr1	+	52602371	52609051	10	main	Multiple_Complex	NM_015696 // RefSeq // Homo sapiens glutathione peroxidase 7 (GPX7), mRNA. // chr1 // 100 // 100 // 0 // --- // 0 /// ENST00000361314 // ENSEMBL // glutathione peroxidase 7 [gene_biotype:protein_coding transcript_biotype:protein_coding] // chr1 // 100 // 100 // 0 // --- // 0 /// ENST00000459779 // ENSEMBL // glutathione peroxidase 7 [gene_biotype:protein_coding transcript_biotype:processed_transc…
TC0100008326.hg.1	TC0100008326.hg.1	chr1	+	52633344	52669683	10	main	Multiple_Complex	NM_001042693 // RefSeq // Homo sapiens family with sequence similarity 159, member A (FAM159A), mRNA. // chr1 // 100 // 100 // 0 // --- // 0 /// ENST00000401050 // ENSEMBL // family with sequence similarity 159, member A [gene_biotype:protein_coding transcript_biotype:processed_transcript] // chr1 // 100 // 100 // 0 // --- // 0 /// ENST00000424164 // ENSEMBL // family with sequence similarity 159…
TC0100008332.hg.1	TC0100008332.hg.1	chr1	+	52726459	52827342	10	main	Multiple_Complex	NM_024646 // RefSeq // Homo sapiens zyg-11 family member B, cell cycle regulator (ZYG11B), mRNA. // chr1 // 100 // 100 // 0 // --- // 0 /// ENST00000294353 // ENSEMBL // zyg-11 family member B, cell cycle regulator [gene_biotype:protein_coding transcript_biotype:protein_coding] // chr1 // 100 // 100 // 0 // --- // 0 /// ENST00000545132 // ENSEMBL // zyg-11 family member B, cell cycle regulator [g…
TC0100008334.hg.1	TC0100008334.hg.1	chr1	+	52842511	52894998	10	main	Multiple_Complex	NM_001004339 // RefSeq // Homo sapiens zyg-11 family member A, cell cycle regulator (ZYG11A), transcript variant 1, mRNA. // chr1 // 100 // 100 // 0 // --- // 0 /// NM_001307931 // RefSeq // Homo sapiens zyg-11 family member A, cell cycle regulator (ZYG11A), transcript variant 2, mRNA. // chr1 // 100 // 100 // 0 // --- // 0 /// ENST00000371528 // ENSEMBL // zyg-11 family member A, cell cycle regu…
TC0100008336.hg.1	TC0100008336.hg.1	chr1	+	52927229	53051703	10	main	Multiple_Complex	NM_001007098 // RefSeq // Homo sapiens sterol carrier protein 2 (SCP2), transcript variant 2, mRNA. // chr1 // 100 // 100 // 0 // --- // 0 /// NM_001007099 // RefSeq // Homo sapiens sterol carrier protein 2 (SCP2), transcript variant 3, mRNA. // chr1 // 100 // 100 // 0 // --- // 0 /// NM_001007100 // RefSeq // Homo sapiens sterol carrier protein 2 (SCP2), transcript variant 4, mRNA. // chr1 // 10…
TC0100008341.hg.1	TC0100008341.hg.1	chr1	+	53062052	53085502	10	main	Multiple_Complex	NM_001199080 // RefSeq // Homo sapiens podocan (PODN), transcript variant 2, mRNA. // chr1 // 100 // 100 // 0 // --- // 0 /// NM_001199081 // RefSeq // Homo sapiens podocan (PODN), transcript variant 3, mRNA. // chr1 // 100 // 100 // 0 // --- // 0 /// NM_001199082 // RefSeq // Homo sapiens podocan (PODN), transcript variant 4, mRNA. // chr1 // 100 // 100 // 0 // --- // 0 /// NM_153703 // RefSeq /…
TC0100008342.hg.1	TC0100008342.hg.1	chr1	+	53086705	53087184	6	main	Unassigned	PODN.kAug10-unspliced // Ace View // Transcript Identified by AceView, Entrez Gene ID(s) 127435 // chr1 // 100 // 100 // 0 // --- // 0
TC0100008347.hg.1	TC0100008347.hg.1	chr1	+	53196429	53214197	10	main	Multiple_Complex	NM_000098 // RefSeq // Homo sapiens carnitine palmitoyltransferase 2 (CPT2), mRNA. // chr1 // 100 // 100 // 0 // --- // 0 /// ENST00000371486 // ENSEMBL // carnitine palmitoyltransferase 2 [gene_biotype:protein_coding transcript_biotype:protein_coding] // chr1 // 100 // 100 // 0 // --- // 0 /// ENST00000468572 // ENSEMBL // carnitine palmitoyltransferase 2 [gene_biotype:protein_coding transcript_…
TC0100008358.hg.1	TC0100008358.hg.1	chr1	+	53459399	53467488	10	main	Multiple_Complex	NM_033067 // RefSeq // Homo sapiens DMRT-like family B with proline-rich C-terminal, 1 (DMRTB1), mRNA. // chr1 // 100 // 100 // 0 // --- // 0 /// ENST00000371445 // ENSEMBL // DMRT-like family B with proline-rich C-terminal, 1 [gene_biotype:protein_coding transcript_biotype:protein_coding] // chr1 // 100 // 100 // 0 // --- // 0 /// ENST00000463126 // ENSEMBL // DMRT-like family B with proline-ric…
TC0100008366.hg.1	TC0100008366.hg.1	chr1	+	53891239	53911086	10	main	Multiple_Complex	NM_000792 // RefSeq // Homo sapiens deiodinase, iodothyronine, type I (DIO1), transcript variant 1, mRNA. // chr1 // 100 // 100 // 0 // --- // 0 /// NM_001039715 // RefSeq // Homo sapiens deiodinase, iodothyronine, type I (DIO1), transcript variant 3, mRNA. // chr1 // 100 // 100 // 0 // --- // 0 /// NM_001039716 // RefSeq // Homo sapiens deiodinase, iodothyronine, type I (DIO1), transcript varian…
TC0100008369.hg.1	TC0100008369.hg.1	chr1	+	53946077	53968168	10	main	Multiple_Complex	NM_001256409 // RefSeq // Homo sapiens leucine rich repeat containing 42 (LRRC42), transcript variant 1, mRNA. // chr1 // 100 // 100 // 0 // --- // 0 /// NM_052940 // RefSeq // Homo sapiens leucine rich repeat containing 42 (LRRC42), transcript variant 2, mRNA. // chr1 // 100 // 100 // 0 // --- // 0 /// ENST00000319223 // ENSEMBL // leucine rich repeat containing 42 [gene_biotype:protein_coding t…
TC0100008375.hg.1	TC0100008375.hg.1	chr1	+	54053572	54112519	10	main	Multiple_Complex	NM_153035 // RefSeq // Homo sapiens transcription elongation factor A (SII) N-terminal and central domain containing 2 (TCEANC2), transcript variant 1, mRNA. // chr1 // 100 // 100 // 0 // --- // 0 /// NR_039942 // RefSeq // Homo sapiens microRNA 4781 (MIR4781), microRNA. // chr1 // 100 // 100 // 0 // --- // 0 /// NR_130900 // RefSeq // Homo sapiens transcription elongation factor A (SII) N-termin…
TC0100008383.hg.1	TC0100008383.hg.1	chr1	+	54184041	54225464	10	main	Multiple_Complex	NM_016491 // RefSeq // Homo sapiens mitochondrial ribosomal protein L37 (MRPL37), mRNA. // chr1 // 100 // 100 // 0 // --- // 0 /// ENST00000336230 // ENSEMBL // mitochondrial ribosomal protein L37 [gene_biotype:protein_coding transcript_biotype:protein_coding] // chr1 // 100 // 100 // 0 // --- // 0 /// ENST00000360840 // ENSEMBL // mitochondrial ribosomal protein L37 [gene_biotype:protein_coding …
TC0100008398.hg.1	TC0100008398.hg.1	chr1	+	54542257	54639192	10	main	Multiple_Complex	NM_015547 // RefSeq // Homo sapiens acyl-CoA thioesterase 11 (ACOT11), transcript variant 1, mRNA. // chr1 // 100 // 100 // 0 // --- // 0 /// NM_147161 // RefSeq // Homo sapiens acyl-CoA thioesterase 11 (ACOT11), transcript variant 2, mRNA. // chr1 // 100 // 100 // 0 // --- // 0 /// ENST00000343744 // ENSEMBL // acyl-CoA thioesterase 11 [gene_biotype:protein_coding transcript_biotype:protein_codi…
TC0100008402.hg.1	TC0100008402.hg.1	chr1	+	54641740	54742657	10	main	Multiple_Complex	NM_001039464 // RefSeq // Homo sapiens maestro heat-like repeat family member 7 (MROH7), transcript variant 1, mRNA. // chr1 // 100 // 100 // 0 // --- // 0 /// NM_001291332 // RefSeq // Homo sapiens maestro heat-like repeat family member 7 (MROH7), transcript variant 3, mRNA. // chr1 // 100 // 100 // 0 // --- // 0 /// NM_001291333 // RefSeq // Homo sapiens tetratricopeptide repeat domain 4 (TTC4)…
TC0100008410.hg.1	TC0100008410.hg.1	chr1	+	54806063	54842264	10	main	Coding	NM_001110533 // RefSeq // Homo sapiens lymphocyte expansion molecule (LEXM), transcript variant 2, mRNA. // chr1 // 100 // 100 // 0 // --- // 0 /// NM_152607 // RefSeq // Homo sapiens lymphocyte expansion molecule (LEXM), transcript variant 1, mRNA. // chr1 // 100 // 100 // 0 // --- // 0 /// ENST00000358193 // ENSEMBL // chromosome 1 open reading frame 177 [gene_biotype:protein_coding transcript_…
TC0100008411.hg.1	TC0100008411.hg.1	chr1	+	54886875	54889273	10	main	Multiple_Complex	ENST00000415336.1 // lncRNAWiki // N/A // chr1 // 100 // 100 // 0 // --- // 0 /// ENST00000433690.1 // lncRNAWiki // N/A // chr1 // 100 // 100 // 0 // --- // 0 /// ENST00000436033.1 // lncRNAWiki // N/A // chr1 // 100 // 100 // 0 // --- // 0 /// ENST00000443284.1 // lncRNAWiki // N/A // chr1 // 100 // 100 // 0 // --- // 0 /// ENST00000455380.1 // lncRNAWiki // N/A // chr1 // 100 // 100 // 0 // --…
TC0100008414.hg.1	TC0100008414.hg.1	chr1	+	54980664	54992293	10	main	Coding	NM_182532 // RefSeq // Homo sapiens transmembrane protein 61 (TMEM61), mRNA. // chr1 // 100 // 100 // 0 // --- // 0 /// ENST00000371268 // ENSEMBL // transmembrane protein 61 [gene_biotype:protein_coding transcript_biotype:protein_coding] // chr1 // 100 // 100 // 0 // --- // 0 /// BC029775 // GenBank // Homo sapiens transmembrane protein 61, mRNA (cDNA clone MGC:35394 IMAGE:5186268), complete cds…
TC0100008416.hg.1	TC0100008416.hg.1	chr1	+	54998933	55010883	10	main	Coding	NM_057176 // RefSeq // Homo sapiens barttin CLCNK-type chloride channel accessory beta subunit (BSND), mRNA. // chr1 // 100 // 100 // 0 // --- // 0 /// ENST00000371265 // ENSEMBL // barttin CLCNK-type chloride channel accessory beta subunit [gene_biotype:protein_coding transcript_biotype:protein_coding] // chr1 // 100 // 100 // 0 // --- // 0 /// BC103898 // GenBank // Homo sapiens Bartter syndrom…
TC0100008417.hg.1	TC0100008417.hg.1	chr1	+	55039476	55064853	10	main	Multiple_Complex	NM_174936 // RefSeq // Homo sapiens proprotein convertase subtilisin/kexin type 9 (PCSK9), transcript variant 1, mRNA. // chr1 // 100 // 100 // 0 // --- // 0 /// NR_110451 // RefSeq // Homo sapiens proprotein convertase subtilisin/kexin type 9 (PCSK9), transcript variant 2, non-coding RNA. // chr1 // 100 // 100 // 0 // --- // 0 /// ENST00000302118 // ENSEMBL // proprotein convertase subtilisin/ke…
TC0100008450.hg.1	TC0100008450.hg.1	chr1	+	56645317	56715335	10	main	Multiple_Complex	NM_006252 // RefSeq // Homo sapiens protein kinase, AMP-activated, alpha 2 catalytic subunit (PRKAA2), mRNA. // chr1 // 100 // 100 // 0 // --- // 0 /// ENST00000371244 // ENSEMBL // protein kinase, AMP-activated, alpha 2 catalytic subunit [gene_biotype:protein_coding transcript_biotype:protein_coding] // chr1 // 100 // 100 // 0 // --- // 0 /// ENST00000610361 // ENSEMBL // protein kinase, AMP-act…
TC0100008454.hg.1	TC0100008454.hg.1	chr1	+	56854770	56918221	10	main	Coding	NM_000562 // RefSeq // Homo sapiens complement component 8, alpha polypeptide (C8A), mRNA. // chr1 // 100 // 100 // 0 // --- // 0 /// ENST00000361249 // ENSEMBL // complement component 8, alpha polypeptide [gene_biotype:protein_coding transcript_biotype:protein_coding] // chr1 // 100 // 100 // 0 // --- // 0 /// BC132911 // GenBank // Homo sapiens complement component 8, alpha polypeptide, mRNA (c…
TC0100008496.hg.1	TC0100008496.hg.1	chr1	+	59296638	59767675	10	main	Multiple_Complex	NM_001113411 // RefSeq // Homo sapiens FGGY carbohydrate kinase domain containing (FGGY), transcript variant 1, mRNA. // chr1 // 100 // 100 // 0 // --- // 0 /// NM_001244714 // RefSeq // Homo sapiens FGGY carbohydrate kinase domain containing (FGGY), transcript variant 3, mRNA. // chr1 // 100 // 100 // 0 // --- // 0 /// NM_001278224 // RefSeq // Homo sapiens FGGY carbohydrate kinase domain contai…
TC0100008503.hg.1	TC0100008503.hg.1	chr1	+	59814786	59876378	10	main	Multiple_Complex	NM_015888 // RefSeq // Homo sapiens hook microtubule-tethering protein 1 (HOOK1), mRNA. // chr1 // 100 // 100 // 0 // --- // 0 /// ENST00000371208 // ENSEMBL // hook microtubule-tethering protein 1 [gene_biotype:protein_coding transcript_biotype:protein_coding] // chr1 // 100 // 100 // 0 // --- // 0 /// ENST00000455990 // ENSEMBL // hook microtubule-tethering protein 1 [gene_biotype:protein_codin…
TC0100008517.hg.1	TC0100008517.hg.1	chr1	+	60865259	61462793	10	main	Multiple_Complex	NM_001134673 // RefSeq // Homo sapiens nuclear factor I/A (NFIA), transcript variant 1, mRNA. // chr1 // 100 // 100 // 0 // --- // 0 /// NM_001145511 // RefSeq // Homo sapiens nuclear factor I/A (NFIA), transcript variant 3, mRNA. // chr1 // 100 // 100 // 0 // --- // 0 /// NM_001145512 // RefSeq // Homo sapiens nuclear factor I/A (NFIA), transcript variant 4, mRNA. // chr1 // 100 // 100 // 0 // -…
TC0100008536.hg.1	TC0100008536.hg.1	chr1	+	61742477	62163920	10	main	Multiple_Complex	NM_176877 // RefSeq // Homo sapiens InaD-like (Drosophila) (INADL), mRNA. // chr1 // 100 // 100 // 0 // --- // 0 /// ENST00000307297 // ENSEMBL // InaD-like (Drosophila) [gene_biotype:protein_coding transcript_biotype:protein_coding] // chr1 // 100 // 100 // 0 // --- // 0 /// ENST00000316485 // ENSEMBL // InaD-like (Drosophila) [gene_biotype:protein_coding transcript_biotype:protein_coding] // ch…
TC0100008549.hg.1	TC0100008549.hg.1	chr1	+	62194802	62212329	10	main	Multiple_Complex	NM_001164835 // RefSeq // Homo sapiens LINE-1 type transposase domain containing 1 (L1TD1), transcript variant 1, mRNA. // chr1 // 100 // 100 // 0 // --- // 0 /// NM_019079 // RefSeq // Homo sapiens LINE-1 type transposase domain containing 1 (L1TD1), transcript variant 2, mRNA. // chr1 // 100 // 100 // 0 // --- // 0 /// ENST00000498273 // ENSEMBL // LINE-1 type transposase domain containing 1 [g…
TC0100008554.hg.1	TC0100008554.hg.1	chr1	+	62436297	62451804	10	main	Multiple_Complex	NM_001017415 // RefSeq // Homo sapiens ubiquitin specific peptidase 1 (USP1), transcript variant 2, mRNA. // chr1 // 100 // 100 // 0 // --- // 0 /// NM_001017416 // RefSeq // Homo sapiens ubiquitin specific peptidase 1 (USP1), transcript variant 3, mRNA. // chr1 // 100 // 100 // 0 // --- // 0 /// NM_003368 // RefSeq // Homo sapiens ubiquitin specific peptidase 1 (USP1), transcript variant 1, mRNA…
TC0100008559.hg.1	TC0100008559.hg.1	chr1	+	62597487	62606305	10	main	Multiple_Complex	NM_014495 // RefSeq // Homo sapiens angiopoietin-like 3 (ANGPTL3), mRNA. // chr1 // 100 // 100 // 0 // --- // 0 /// ENST00000371129 // ENSEMBL // angiopoietin-like 3 [gene_biotype:protein_coding transcript_biotype:protein_coding] // chr1 // 100 // 100 // 0 // --- // 0 /// ENST00000482591 // ENSEMBL // angiopoietin-like 3 [gene_biotype:protein_coding transcript_biotype:processed_transcript] // chr…
TC0100008564.hg.1	TC0100008564.hg.1	chr1	+	62784106	62865513	10	main	Multiple_Complex	NM_032852 // RefSeq // Homo sapiens autophagy related 4C, cysteine peptidase (ATG4C), transcript variant 1, mRNA. // chr1 // 100 // 100 // 0 // --- // 0 /// NM_178221 // RefSeq // Homo sapiens autophagy related 4C, cysteine peptidase (ATG4C), transcript variant 2, mRNA. // chr1 // 100 // 100 // 0 // --- // 0 /// ENST00000317868 // ENSEMBL // autophagy related 4C, cysteine peptidase [gene_biotype:…
TC0100008582.hg.1	TC0100008582.hg.1	chr1	+	63323041	63325126	10	main	Multiple_Complex	NM_012183 // RefSeq // Homo sapiens forkhead box D3 (FOXD3), mRNA. // chr1 // 100 // 100 // 0 // --- // 0 /// ENST00000371116 // ENSEMBL // forkhead box D3 [gene_biotype:protein_coding transcript_biotype:protein_coding] // chr1 // 100 // 100 // 0 // --- // 0 /// OTTHUMT00000025331 // Havana transcript // forkhead box D3[gene_biotype:protein_coding transcript_biotype:protein_coding] // chr1 // 100…
TC0100008584.hg.1	TC0100008584.hg.1	chr1	+	63367590	63438562	10	main	Multiple_Complex	NM_013339 // RefSeq // Homo sapiens ALG6, alpha-1,3-glucosyltransferase (ALG6), mRNA. // chr1 // 100 // 100 // 0 // --- // 0 /// ENST00000263440 // ENSEMBL // ALG6, alpha-1,3-glucosyltransferase [gene_biotype:protein_coding transcript_biotype:protein_coding] // chr1 // 100 // 100 // 0 // --- // 0 /// ENST00000371108 // ENSEMBL // ALG6, alpha-1,3-glucosyltransferase [gene_biotype:protein_coding tr…
TC0100008588.hg.1	TC0100008588.hg.1	chr1	+	63523301	63572693	10	main	Multiple_Complex	NM_032437 // RefSeq // Homo sapiens EF-hand calcium binding domain 7 (EFCAB7), mRNA. // chr1 // 100 // 100 // 0 // --- // 0 /// NR_002771 // RefSeq // Homo sapiens deleted in lymphocytic leukemia 2-like (DLEU2L), non-coding RNA. // chr1 // 100 // 100 // 0 // --- // 0 /// ENST00000371088 // ENSEMBL // EF-hand calcium binding domain 7 [gene_biotype:protein_coding transcript_biotype:protein_coding] …
TC0100008591.hg.1	TC0100008591.hg.1	chr1	+	63593276	63660246	10	main	Multiple_Complex	NM_001172818 // RefSeq // Homo sapiens phosphoglucomutase 1 (PGM1), transcript variant 2, mRNA. // chr1 // 100 // 100 // 0 // --- // 0 /// NM_001172819 // RefSeq // Homo sapiens phosphoglucomutase 1 (PGM1), transcript variant 3, mRNA. // chr1 // 100 // 100 // 0 // --- // 0 /// NM_002633 // RefSeq // Homo sapiens phosphoglucomutase 1 (PGM1), transcript variant 1, mRNA. // chr1 // 100 // 100 // 0 /…
TC0100008594.hg.1	TC0100008594.hg.1	chr1	+	63774019	64181498	10	main	Multiple_Complex	NM_001083592 // RefSeq // Homo sapiens receptor tyrosine kinase-like orphan receptor 1 (ROR1), transcript variant 2, mRNA. // chr1 // 100 // 100 // 0 // --- // 0 /// NM_005012 // RefSeq // Homo sapiens receptor tyrosine kinase-like orphan receptor 1 (ROR1), transcript variant 1, mRNA. // chr1 // 100 // 100 // 0 // --- // 0 /// ENST00000371079 // ENSEMBL // receptor tyrosine kinase-like orphan rec…
TC0100008599.hg.1	TC0100008599.hg.1	chr1	+	64203627	64267368	10	main	Multiple_Complex	NM_152489 // RefSeq // Homo sapiens ubiquitin-conjugating enzyme E2U (putative) (UBE2U), mRNA. // chr1 // 100 // 100 // 0 // --- // 0 /// ENST00000371076 // ENSEMBL // ubiquitin-conjugating enzyme E2U (putative) [gene_biotype:protein_coding transcript_biotype:protein_coding] // chr1 // 100 // 100 // 0 // --- // 0 /// ENST00000371077 // ENSEMBL // ubiquitin-conjugating enzyme E2U (putative) [gene_…
TC0100008602.hg.1	TC0100008602.hg.1	chr1	+	64470792	64693058	10	main	Multiple_Complex	NM_001293274 // RefSeq // Homo sapiens cache domain containing 1 (CACHD1), transcript variant 2, mRNA. // chr1 // 100 // 100 // 0 // --- // 0 /// NM_020925 // RefSeq // Homo sapiens cache domain containing 1 (CACHD1), transcript variant 1, mRNA. // chr1 // 100 // 100 // 0 // --- // 0 /// ENST00000290039 // ENSEMBL // cache domain containing 1 [gene_biotype:protein_coding transcript_biotype:protei…
TC0100008607.hg.1	TC0100008607.hg.1	chr1	+	64745095	65202396	10	main	Multiple_Complex	NM_018211 // RefSeq // Homo sapiens ribonucleoprotein, PTB-binding 2 (RAVER2), mRNA. // chr1 // 100 // 100 // 0 // --- // 0 /// ENST00000294428 // ENSEMBL // ribonucleoprotein, PTB-binding 2 [gene_biotype:protein_coding transcript_biotype:protein_coding] // chr1 // 100 // 100 // 0 // --- // 0 /// ENST00000371072 // ENSEMBL // ribonucleoprotein, PTB-binding 2 [gene_biotype:protein_coding transcrip…
TC0100008618.hg.1	TC0100008618.hg.1	chr1	+	65147549	65232145	10	main	Multiple_Complex	NM_001005353 // RefSeq // Homo sapiens adenylate kinase 4 (AK4), transcript variant 1, mRNA. // chr1 // 100 // 100 // 0 // --- // 0 /// NM_013410 // RefSeq // Homo sapiens adenylate kinase 4 (AK4), transcript variant 2, mRNA. // chr1 // 100 // 100 // 0 // --- // 0 /// NM_203464 // RefSeq // Homo sapiens adenylate kinase 4 (AK4), transcript variant 3, mRNA. // chr1 // 100 // 100 // 0 // --- // 0 /…
TC0100008620.hg.1	TC0100008620.hg.1	chr1	+	65248219	65416006	10	main	Multiple_Complex	NM_001256864 // RefSeq // Homo sapiens DnaJ (Hsp40) homolog, subfamily C, member 6 (DNAJC6), transcript variant 1, mRNA. // chr1 // 100 // 100 // 0 // --- // 0 /// NM_001256865 // RefSeq // Homo sapiens DnaJ (Hsp40) homolog, subfamily C, member 6 (DNAJC6), transcript variant 3, mRNA. // chr1 // 100 // 100 // 0 // --- // 0 /// NM_014787 // RefSeq // Homo sapiens DnaJ (Hsp40) homolog, subfamily C, …
TC0100008621.hg.1	TC0100008621.hg.1	chr1	+	65420448	65641615	10	main	Multiple_Complex	NM_001003679 // RefSeq // Homo sapiens leptin receptor (LEPR), transcript variant 3, mRNA. // chr1 // 100 // 100 // 0 // --- // 0 /// NM_001003680 // RefSeq // Homo sapiens leptin receptor (LEPR), transcript variant 2, mRNA. // chr1 // 100 // 100 // 0 // --- // 0 /// NM_001198681 // RefSeq // Homo sapiens leptin receptor overlapping transcript (LEPROT), transcript variant 2, mRNA. // chr1 // 100 …
TC0100008622.hg.1	TC0100008622.hg.1	chr1	+	65486391	65498770	10	main	NonCoding	boyboy.aAug10 // Ace View // Transcript Identified by AceView // chr1 // 100 // 100 // 0 // --- // 0 /// ENST00000429871.1 // lncRNAWiki // N/A // chr1 // 100 // 100 // 0 // --- // 0 /// hsa_circ_0008632 // circbase // Jeck2013 ALT_ACCEPTOR, ALT_DONOR, coding, INTERNAL, intronic best transcript NM_001003679 // chr1 // 100 // 100 // 0 // --- // 0 /// OTTHUMT00000025274 // Havana transcript // puta…
TC0100008625.hg.1	TC0100008625.hg.1	chr1	+	65792510	66374579	10	main	Multiple_Complex	NM_001037339 // RefSeq // Homo sapiens phosphodiesterase 4B, cAMP-specific (PDE4B), transcript variant b, mRNA. // chr1 // 100 // 100 // 0 // --- // 0 /// NM_001037340 // RefSeq // Homo sapiens phosphodiesterase 4B, cAMP-specific (PDE4B), transcript variant c, mRNA. // chr1 // 100 // 100 // 0 // --- // 0 /// NM_001037341 // RefSeq // Homo sapiens phosphodiesterase 4B, cAMP-specific (PDE4B), trans…
TC0100008631.hg.1	TC0100008631.hg.1	chr1	+	66533383	66751139	10	main	Multiple_Complex	NM_001308203 // RefSeq // Homo sapiens SH3-domain GRB2-like (endophilin) interacting protein 1 (SGIP1), transcript variant 2, mRNA. // chr1 // 100 // 100 // 0 // --- // 0 /// NM_032291 // RefSeq // Homo sapiens SH3-domain GRB2-like (endophilin) interacting protein 1 (SGIP1), transcript variant 1, mRNA. // chr1 // 100 // 100 // 0 // --- // 0 /// ENST00000237247 // ENSEMBL // SH3-domain GRB2-like (…
TC0100008637.hg.1	TC0100008637.hg.1	chr1	+	66752457	66779047	10	main	Multiple_Complex	NM_152665 // RefSeq // Homo sapiens Tctex1 domain containing 1 (TCTEX1D1), mRNA. // chr1 // 100 // 100 // 0 // --- // 0 /// ENST00000282670 // ENSEMBL // Tctex1 domain containing 1 [gene_biotype:protein_coding transcript_biotype:protein_coding] // chr1 // 100 // 100 // 0 // --- // 0 /// ENST00000448074 // ENSEMBL // Tctex1 domain containing 1 [gene_biotype:protein_coding transcript_biotype:proces…
TC0100008641.hg.1	TC0100008641.hg.1	chr1	+	66924895	66988619	10	main	Multiple_Complex	NM_001077700 // RefSeq // Homo sapiens mesoderm induction early response 1, transcriptional regulator (MIER1), transcript variant 2, mRNA. // chr1 // 100 // 100 // 0 // --- // 0 /// NM_001077701 // RefSeq // Homo sapiens mesoderm induction early response 1, transcriptional regulator (MIER1), transcript variant 3, mRNA. // chr1 // 100 // 100 // 0 // --- // 0 /// NM_001077702 // RefSeq // Homo sapi…
TC0100008648.hg.1	TC0100008648.hg.1	chr1	+	67166400	67259979	10	main	Multiple_Complex	NM_144701 // RefSeq // Homo sapiens interleukin 23 receptor (IL23R), mRNA. // chr1 // 100 // 100 // 0 // --- // 0 /// ENST00000347310 // ENSEMBL // interleukin 23 receptor [gene_biotype:protein_coding transcript_biotype:protein_coding] // chr1 // 100 // 100 // 0 // --- // 0 /// ENST00000395227 // ENSEMBL // interleukin 23 receptor [gene_biotype:protein_coding transcript_biotype:protein_coding] //…
TC0100008653.hg.1	TC0100008653.hg.1	chr1	+	67307364	67396900	10	main	Multiple_Complex	NM_001258214 // RefSeq // Homo sapiens interleukin 12 receptor, beta 2 (IL12RB2), transcript variant 2, mRNA. // chr1 // 100 // 100 // 0 // --- // 0 /// NM_001258215 // RefSeq // Homo sapiens interleukin 12 receptor, beta 2 (IL12RB2), transcript variant 3, mRNA. // chr1 // 100 // 100 // 0 // --- // 0 /// NM_001258216 // RefSeq // Homo sapiens interleukin 12 receptor, beta 2 (IL12RB2), transcript …
TC0100008664.hg.1	TC0100008664.hg.1	chr1	+	67685061	67688338	10	main	Multiple_Complex	NM_001199741 // RefSeq // Homo sapiens growth arrest and DNA-damage-inducible, alpha (GADD45A), transcript variant 2, mRNA. // chr1 // 100 // 100 // 0 // --- // 0 /// NM_001199742 // RefSeq // Homo sapiens growth arrest and DNA-damage-inducible, alpha (GADD45A), transcript variant 3, mRNA. // chr1 // 100 // 100 // 0 // --- // 0 /// NM_001924 // RefSeq // Homo sapiens growth arrest and DNA-damage-…
TC0100008686.hg.1	TC0100008686.hg.1	chr1	+	69568398	70151945	10	main	Multiple_Complex	NM_020794 // RefSeq // Homo sapiens leucine rich repeat containing 7 (LRRC7), mRNA. // chr1 // 100 // 100 // 0 // --- // 0 /// ENST00000035383 // ENSEMBL // leucine rich repeat containing 7 [gene_biotype:protein_coding transcript_biotype:protein_coding] // chr1 // 100 // 100 // 0 // --- // 0 /// ENST00000310961 // ENSEMBL // leucine rich repeat containing 7 [gene_biotype:protein_coding transcript…
TC0100008692.hg.1	TC0100008692.hg.1	chr1	+	70205682	70253052	10	main	Multiple_Complex	NM_001190987 // RefSeq // Homo sapiens serine/arginine-rich splicing factor 11 (SRSF11), transcript variant 2, mRNA. // chr1 // 100 // 100 // 0 // --- // 0 /// NM_004768 // RefSeq // Homo sapiens serine/arginine-rich splicing factor 11 (SRSF11), transcript variant 1, mRNA. // chr1 // 100 // 100 // 0 // --- // 0 /// ENST00000370949 // ENSEMBL // serine/arginine-rich splicing factor 11 [gene_biotyp…
TC0100008696.hg.1	TC0100008696.hg.1	chr1	+	70354805	70385339	10	main	Multiple_Complex	NM_001031693 // RefSeq // Homo sapiens HERV-H LTR-associating 3 (HHLA3), transcript variant 1, mRNA. // chr1 // 100 // 100 // 0 // --- // 0 /// NM_001036645 // RefSeq // Homo sapiens HERV-H LTR-associating 3 (HHLA3), transcript variant 2, mRNA. // chr1 // 100 // 100 // 0 // --- // 0 /// NM_001036646 // RefSeq // Homo sapiens HERV-H LTR-associating 3 (HHLA3), transcript variant 3, mRNA. // chr1 //…
TC0100008697.hg.1	TC0100008697.hg.1	chr1	+	70411218	70439851	10	main	Multiple_Complex	NM_001190463 // RefSeq // Homo sapiens cystathionine gamma-lyase (CTH), transcript variant 3, mRNA. // chr1 // 100 // 100 // 0 // --- // 0 /// NM_001902 // RefSeq // Homo sapiens cystathionine gamma-lyase (CTH), transcript variant 1, mRNA. // chr1 // 100 // 100 // 0 // --- // 0 /// NM_153742 // RefSeq // Homo sapiens cystathionine gamma-lyase (CTH), transcript variant 2, mRNA. // chr1 // 100 // 1…
TC0100008752.hg.1	TC0100008752.hg.1	chr1	+	74733152	74766678	10	main	Multiple_Complex	NM_001162916 // RefSeq // Homo sapiens tRNA-yW synthesizing protein 3 homolog (S. cerevisiae) (TYW3), transcript variant 2, mRNA. // chr1 // 100 // 100 // 0 // --- // 0 /// NM_138467 // RefSeq // Homo sapiens tRNA-yW synthesizing protein 3 homolog (S. cerevisiae) (TYW3), transcript variant 1, mRNA. // chr1 // 100 // 100 // 0 // --- // 0 /// NR_027962 // RefSeq // Homo sapiens tRNA-yW synthesizing…
TC0100008757.hg.1	TC0100008757.hg.1	chr1	+	75128434	75161533	10	main	Multiple_Complex	NM_001001933 // RefSeq // Homo sapiens LIM homeobox 8 (LHX8), transcript variant 1, mRNA. // chr1 // 100 // 100 // 0 // --- // 0 /// NM_001256114 // RefSeq // Homo sapiens LIM homeobox 8 (LHX8), transcript variant 2, mRNA. // chr1 // 100 // 100 // 0 // --- // 0 /// ENST00000294638 // ENSEMBL // LIM homeobox 8 [gene_biotype:protein_coding transcript_biotype:protein_coding] // chr1 // 100 // 100 //…
TC0100008772.hg.1	TC0100008772.hg.1	chr1	+	75790758	75790977	6	main	NonCoding	hsa_circ_0092339 // circbase // Zhang2013 ALT_ACCEPTOR, ALT_DONOR, coding, INTERNAL, intronic best transcript NM_004582 // chr1 // 100 // 100 // 0 // --- // 0
TC0100008773.hg.1	TC0100008773.hg.1	chr1	+	75795212	75913238	10	main	Multiple_Complex	NM_002440 // RefSeq // Homo sapiens mutS homolog 4 (MSH4), mRNA. // chr1 // 100 // 100 // 0 // --- // 0 /// ENST00000263187 // ENSEMBL // mutS homolog 4 [gene_biotype:protein_coding transcript_biotype:protein_coding] // chr1 // 100 // 100 // 0 // --- // 0 /// BC033030 // GenBank // Homo sapiens mutS homolog 4 (E. coli), mRNA (cDNA clone MGC:33143 IMAGE:5266997), complete cds. // chr1 // 100 // 10…
TC0100008779.hg.1	TC0100008779.hg.1	chr1	+	76074704	76634601	10	main	Multiple_Complex	NM_001160011 // RefSeq // Homo sapiens ST6 (alpha-N-acetyl-neuraminyl-2,3-beta-galactosyl-1, 3)-N-acetylgalactosaminide alpha-2,6-sialyltransferase 3 (ST6GALNAC3), transcript variant 2, mRNA. // chr1 // 100 // 100 // 0 // --- // 0 /// NM_152996 // RefSeq // Homo sapiens ST6 (alpha-N-acetyl-neuraminyl-2,3-beta-galactosyl-1, 3)-N-acetylgalactosaminide alpha-2,6-sialyltransferase 3 (ST6GALNAC3), tra…
TC0100008787.hg.1	TC0100008787.hg.1	chr1	+	76867441	77065711	10	main	Multiple_Complex	NM_030965 // RefSeq // Homo sapiens ST6 (alpha-N-acetyl-neuraminyl-2,3-beta-galactosyl-1, 3)-N-acetylgalactosaminide alpha-2,6-sialyltransferase 5 (ST6GALNAC5), mRNA. // chr1 // 100 // 100 // 0 // --- // 0 /// ENST00000318803 // ENSEMBL // ST6 (alpha-N-acetyl-neuraminyl-2,3-beta-galactosyl-1,3)-N-acetylgalactosaminide alpha-2,6-sialyltransferase 5 [gene_biotype:protein_coding transcript_biotype:n…
TC0100008797.hg.1	TC0100008797.hg.1	chr1	+	77281977	77559969	10	main	Multiple_Complex	NM_012093 // RefSeq // Homo sapiens adenylate kinase 5 (AK5), transcript variant 2, mRNA. // chr1 // 100 // 100 // 0 // --- // 0 /// NM_174858 // RefSeq // Homo sapiens adenylate kinase 5 (AK5), transcript variant 1, mRNA. // chr1 // 100 // 100 // 0 // --- // 0 /// ENST00000317704 // ENSEMBL // adenylate kinase 5 [gene_biotype:protein_coding transcript_biotype:processed_transcript] // chr1 // 100…
TC0100008803.hg.1	TC0100008803.hg.1	chr1	+	77779624	77879540	10	main	Multiple_Complex	NM_001270384 // RefSeq // Homo sapiens family with sequence similarity 73, member A (FAM73A), transcript variant 2, mRNA. // chr1 // 100 // 100 // 0 // --- // 0 /// NM_198549 // RefSeq // Homo sapiens family with sequence similarity 73, member A (FAM73A), transcript variant 1, mRNA. // chr1 // 100 // 100 // 0 // --- // 0 /// ENST00000370791 // ENSEMBL // family with sequence similarity 73, member…
TC0100008807.hg.1	TC0100008807.hg.1	chr1	+	77888513	77943895	10	main	Multiple_Complex	NM_001172309 // RefSeq // Homo sapiens nexilin (F actin binding protein) (NEXN), transcript variant 2, mRNA. // chr1 // 100 // 100 // 0 // --- // 0 /// NM_144573 // RefSeq // Homo sapiens nexilin (F actin binding protein) (NEXN), transcript variant 1, mRNA. // chr1 // 100 // 100 // 0 // --- // 0 /// ENST00000330010 // ENSEMBL // nexilin (F actin binding protein) [gene_biotype:protein_coding trans…
TC0100008812.hg.1	TC0100008812.hg.1	chr1	+	78303884	78540701	10	main	Coding	NM_000959 // RefSeq // Homo sapiens prostaglandin F receptor (FP) (PTGFR), transcript variant 1, mRNA. // chr1 // 100 // 100 // 0 // --- // 0 /// NM_001039585 // RefSeq // Homo sapiens prostaglandin F receptor (FP) (PTGFR), transcript variant 2, mRNA. // chr1 // 100 // 100 // 0 // --- // 0 /// ENST00000370756 // ENSEMBL // prostaglandin F receptor (FP) [gene_biotype:protein_coding transcript_biot…
TC0100008815.hg.1	TC0100008815.hg.1	chr1	+	78619922	78646145	10	main	Multiple_Complex	NM_006820 // RefSeq // Homo sapiens interferon-induced protein 44-like (IFI44L), mRNA. // chr1 // 100 // 100 // 0 // --- // 0 /// ENST00000370751 // ENSEMBL // interferon-induced protein 44-like [gene_biotype:protein_coding transcript_biotype:protein_coding] // chr1 // 100 // 100 // 0 // --- // 0 /// ENST00000450498 // ENSEMBL // interferon-induced protein 44-like [gene_biotype:protein_coding tra…
TC0100008816.hg.1	TC0100008816.hg.1	chr1	+	78649792	78664078	10	main	Multiple_Complex	NM_006417 // RefSeq // Homo sapiens interferon-induced protein 44 (IFI44), mRNA. // chr1 // 100 // 100 // 0 // --- // 0 /// ENST00000370747 // ENSEMBL // interferon-induced protein 44 [gene_biotype:protein_coding transcript_biotype:protein_coding] // chr1 // 100 // 100 // 0 // --- // 0 /// ENST00000438486 // ENSEMBL // interferon-induced protein 44 [gene_biotype:protein_coding transcript_biotype:…
TC0100008845.hg.1	TC0100008845.hg.1	chr1	+	81306160	81992738	10	main	Multiple_Complex	NM_001297704 // RefSeq // Homo sapiens adhesion G protein-coupled receptor L2 (ADGRL2), transcript variant 2, mRNA. // chr1 // 100 // 100 // 0 // --- // 0 /// NM_001297705 // RefSeq // Homo sapiens adhesion G protein-coupled receptor L2 (ADGRL2), transcript variant 3, mRNA. // chr1 // 100 // 100 // 0 // --- // 0 /// NM_001297706 // RefSeq // Homo sapiens adhesion G protein-coupled receptor L2 (AD…
TC0100008874.hg.1	TC0100008874.hg.1	chr1	+	84077975	84238498	10	main	Multiple_Complex	NM_001242857 // RefSeq // Homo sapiens protein kinase, cAMP-dependent, catalytic, beta (PRKACB), transcript variant 4, mRNA. // chr1 // 100 // 100 // 0 // --- // 0 /// NM_001242858 // RefSeq // Homo sapiens protein kinase, cAMP-dependent, catalytic, beta (PRKACB), transcript variant 5, mRNA. // chr1 // 100 // 100 // 0 // --- // 0 /// NM_001242859 // RefSeq // Homo sapiens protein kinase, cAMP-dep…
TC0100008879.hg.1	TC0100008879.hg.1	chr1	+	84298366	84389957	10	main	Multiple_Complex	NM_001010971 // RefSeq // Homo sapiens sterile alpha motif domain containing 13 (SAMD13), transcript variant 1, mRNA. // chr1 // 100 // 100 // 0 // --- // 0 /// NM_001134663 // RefSeq // Homo sapiens sterile alpha motif domain containing 13 (SAMD13), transcript variant 2, mRNA. // chr1 // 100 // 100 // 0 // --- // 0 /// NM_001134664 // RefSeq // Homo sapiens sterile alpha motif domain containing …
TC0100008882.hg.1	TC0100008882.hg.1	chr1	+	84398532	84415018	10	main	Coding	NM_021233 // RefSeq // Homo sapiens deoxyribonuclease II beta (DNASE2B), transcript variant 1, mRNA. // chr1 // 100 // 100 // 0 // --- // 0 /// NM_058248 // RefSeq // Homo sapiens deoxyribonuclease II beta (DNASE2B), transcript variant 2, mRNA. // chr1 // 100 // 100 // 0 // --- // 0 /// ENST00000370662 // ENSEMBL // deoxyribonuclease II beta [gene_biotype:protein_coding transcript_biotype:protein…
TC0100008884.hg.1	TC0100008884.hg.1	chr1	+	84479237	84498350	10	main	Coding	NM_025065 // RefSeq // Homo sapiens ribosome production factor 1 homolog (RPF1), mRNA. // chr1 // 100 // 100 // 0 // --- // 0 /// ENST00000370654 // ENSEMBL // ribosome production factor 1 homolog [gene_biotype:protein_coding transcript_biotype:protein_coding] // chr1 // 100 // 100 // 0 // --- // 0 /// ENST00000370656 // ENSEMBL // ribosome production factor 1 homolog [gene_biotype:protein_coding…
TC0100008885.hg.1	TC0100008885.hg.1	chr1	+	84506291	84567106	10	main	Multiple_Complex	NM_001310156 // RefSeq // Homo sapiens spermatogenesis associated 1 (SPATA1), mRNA. // chr1 // 100 // 100 // 0 // --- // 0 /// BC127634 // GenBank // Homo sapiens spermatogenesis associated 1, mRNA (cDNA clone MGC:157666 IMAGE:40115717), complete cds. // chr1 // 100 // 100 // 0 // --- // 0 /// SPATA1.eAug10 // Ace View // Transcript Identified by AceView, Entrez Gene ID(s) 64173 // chr1 // 100 //…
TC0100008897.hg.1	TC0100008897.hg.1	chr1	+	84999147	85133138	10	main	Multiple_Complex	NM_001288563 // RefSeq // Homo sapiens WD repeat domain 63 (WDR63), transcript variant 2, mRNA. // chr1 // 100 // 100 // 0 // --- // 0 /// NM_145172 // RefSeq // Homo sapiens WD repeat domain 63 (WDR63), transcript variant 1, mRNA. // chr1 // 100 // 100 // 0 // --- // 0 /// ENST00000294664 // ENSEMBL // WD repeat domain 63 [gene_biotype:protein_coding transcript_biotype:protein_coding] // chr1 //…
TC0100008912.hg.1	TC0100008912.hg.1	chr1	+	85580761	85583965	10	main	Multiple_Complex	NM_001554 // RefSeq // Homo sapiens cysteine-rich, angiogenic inducer, 61 (CYR61), mRNA. // chr1 // 100 // 100 // 0 // --- // 0 /// ENST00000451137 // ENSEMBL // cysteine-rich, angiogenic inducer, 61 [gene_biotype:protein_coding transcript_biotype:protein_coding] // chr1 // 100 // 100 // 0 // --- // 0 /// ENST00000480413 // ENSEMBL // cysteine-rich, angiogenic inducer, 61 [gene_biotype:protein_co…
TC0100008921.hg.1	TC0100008921.hg.1	chr1	+	86424086	86456558	10	main	Multiple_Complex	NM_006536 // RefSeq // Homo sapiens chloride channel accessory 2 (CLCA2), mRNA. // chr1 // 100 // 100 // 0 // --- // 0 /// ENST00000370565 // ENSEMBL // chloride channel accessory 2 [gene_biotype:protein_coding transcript_biotype:protein_coding] // chr1 // 100 // 100 // 0 // --- // 0 /// ENST00000490884 // ENSEMBL // chloride channel accessory 2 [gene_biotype:protein_coding transcript_biotype:pro…
TC0100008922.hg.1	TC0100008922.hg.1	chr1	+	86468368	86500291	10	main	Coding	NM_001285 // RefSeq // Homo sapiens chloride channel accessory 1 (CLCA1), mRNA. // chr1 // 100 // 100 // 0 // --- // 0 /// ENST00000234701 // ENSEMBL // chloride channel accessory 1 [gene_biotype:protein_coding transcript_biotype:protein_coding] // chr1 // 100 // 100 // 0 // --- // 0 /// ENST00000394711 // ENSEMBL // chloride channel accessory 1 [gene_biotype:protein_coding transcript_biotype:pro…
TC0100008924.hg.1	TC0100008924.hg.1	chr1	+	86547076	86580754	10	main	Multiple_Complex	NM_012128 // RefSeq // Homo sapiens chloride channel accessory 4 (CLCA4), transcript variant 1, mRNA. // chr1 // 100 // 100 // 0 // --- // 0 /// NR_024602 // RefSeq // Homo sapiens chloride channel accessory 4 (CLCA4), transcript variant 2, non-coding RNA. // chr1 // 100 // 100 // 0 // --- // 0 /// ENST00000370563 // ENSEMBL // chloride channel accessory 4 [gene_biotype:protein_coding transcript_…
TC0100008927.hg.1	TC0100008927.hg.1	chr1	+	86704570	86748184	10	main	Multiple_Complex	NM_001206651 // RefSeq // Homo sapiens SH3-domain GRB2-like endophilin B1 (SH3GLB1), transcript variant 2, mRNA. // chr1 // 100 // 100 // 0 // --- // 0 /// NM_001206652 // RefSeq // Homo sapiens SH3-domain GRB2-like endophilin B1 (SH3GLB1), transcript variant 3, mRNA. // chr1 // 100 // 100 // 0 // --- // 0 /// NM_001206653 // RefSeq // Homo sapiens SH3-domain GRB2-like endophilin B1 (SH3GLB1), tr…
TC0100008937.hg.1	TC0100008937.hg.1	chr1	+	87212669	87251331	10	main	Coding	NM_001290053 // RefSeq // Homo sapiens uncharacterized LOC101927844 (LOC101927844), mRNA. // chr1 // 100 // 100 // 0 // --- // 0 /// serfawbu.bAug10 // Ace View // Transcript Identified by AceView // chr1 // 100 // 100 // 0 // --- // 0
TC0100008938.hg.1	TC0100008938.hg.1	chr1	+	87328468	87348923	10	main	Multiple_Complex	NM_006769 // RefSeq // Homo sapiens LIM domain only 4 (LMO4), mRNA. // chr1 // 100 // 100 // 0 // --- // 0 /// ENST00000370542 // ENSEMBL // LIM domain only 4 [gene_biotype:protein_coding transcript_biotype:protein_coding] // chr1 // 100 // 100 // 0 // --- // 0 /// ENST00000370544 // ENSEMBL // LIM domain only 4 [gene_biotype:protein_coding transcript_biotype:protein_coding] // chr1 // 100 // 100…
TC0100008955.hg.1	TC0100008955.hg.1	chr1	+	88684222	88836255	10	main	Multiple_Complex	NM_006256 // RefSeq // Homo sapiens protein kinase N2 (PKN2), mRNA. // chr1 // 100 // 100 // 0 // --- // 0 /// ENST00000316005 // ENSEMBL // protein kinase N2 [gene_biotype:protein_coding transcript_biotype:protein_coding] // chr1 // 100 // 100 // 0 // --- // 0 /// ENST00000370505 // ENSEMBL // protein kinase N2 [gene_biotype:protein_coding transcript_biotype:protein_coding] // chr1 // 100 // 100…
TC0100008965.hg.1	TC0100008965.hg.1	chr1	+	89012127	89050043	10	main	NonCoding	flawmawbo.aAug10 // Ace View // Transcript Identified by AceView // chr1 // 100 // 100 // 0 // --- // 0 /// hsa_circ_0000090 // circbase // Memczak2013 ANTISENSE, CDS, coding, INTERNAL, intronic, UTR5 best transcript NM_018284 // chr1 // 100 // 100 // 0 // --- // 0 /// lnc-PKN2-1:1 // lncRNAWiki // Transcript Originally Identified by LNCipedia, alternate transcript name: NONHSAT004338 // chr1 // …
TC0100008975.hg.1	TC0100008975.hg.1	chr1	+	89363877	89388160	10	main	Coding	NM_198460 // RefSeq // Homo sapiens guanylate binding protein family, member 6 (GBP6), mRNA. // chr1 // 100 // 100 // 0 // --- // 0 /// ENST00000370456 // ENSEMBL // guanylate binding protein family, member 6 [gene_biotype:protein_coding transcript_biotype:protein_coding] // chr1 // 100 // 100 // 0 // --- // 0 /// BC131713 // GenBank // Homo sapiens guanylate binding protein family, member 6, mRN…
TC0100008978.hg.1	TC0100008978.hg.1	chr1	+	89524836	89597864	10	main	Multiple_Complex	NM_001134476 // RefSeq // Homo sapiens leucine rich repeat containing 8 family, member B (LRRC8B), transcript variant 2, mRNA. // chr1 // 100 // 100 // 0 // --- // 0 /// NM_015350 // RefSeq // Homo sapiens leucine rich repeat containing 8 family, member B (LRRC8B), transcript variant 1, mRNA. // chr1 // 100 // 100 // 0 // --- // 0 /// ENST00000330947 // ENSEMBL // leucine rich repeat containing 8…
TC0100008996.hg.1	TC0100008996.hg.1	chr1	+	89995112	90035531	10	main	Multiple_Complex	NM_182975 // RefSeq // Homo sapiens zinc finger protein 326 (ZNF326), transcript variant 3, mRNA. // chr1 // 100 // 100 // 0 // --- // 0 /// NM_182976 // RefSeq // Homo sapiens zinc finger protein 326 (ZNF326), transcript variant 1, mRNA. // chr1 // 100 // 100 // 0 // --- // 0 /// ENST00000340281 // ENSEMBL // zinc finger protein 326 [gene_biotype:protein_coding transcript_biotype:protein_coding]…
TC0100009020.hg.1	TC0100009020.hg.1	chr1	+	91500847	91525764	10	main	Multiple_Complex	NM_001134419 // RefSeq // Homo sapiens cell division cycle 7 (CDC7), transcript variant 2, mRNA. // chr1 // 100 // 100 // 0 // --- // 0 /// NM_001134420 // RefSeq // Homo sapiens cell division cycle 7 (CDC7), transcript variant 3, mRNA. // chr1 // 100 // 100 // 0 // --- // 0 /// NM_003503 // RefSeq // Homo sapiens cell division cycle 7 (CDC7), transcript variant 1, mRNA. // chr1 // 100 // 100 // …
TC0100009029.hg.1	TC0100009029.hg.1	chr1	+	91949371	92014428	10	main	Multiple_Complex	NM_001242805 // RefSeq // Homo sapiens bromodomain, testis-specific (BRDT), transcript variant 3, mRNA. // chr1 // 100 // 100 // 0 // --- // 0 /// NM_001242806 // RefSeq // Homo sapiens bromodomain, testis-specific (BRDT), transcript variant 4, mRNA. // chr1 // 100 // 100 // 0 // --- // 0 /// NM_001242807 // RefSeq // Homo sapiens bromodomain, testis-specific (BRDT), transcript variant 5, mRNA. /…
TC0100009030.hg.1	TC0100009030.hg.1	chr1	+	92029976	92063536	10	main	Multiple_Complex	NM_173567 // RefSeq // Homo sapiens epoxide hydrolase 4 (EPHX4), mRNA. // chr1 // 100 // 100 // 0 // --- // 0 /// ENST00000370383 // ENSEMBL // epoxide hydrolase 4 [gene_biotype:protein_coding transcript_biotype:protein_coding] // chr1 // 100 // 100 // 0 // --- // 0 /// ENST00000480758 // ENSEMBL // epoxide hydrolase 4 [gene_biotype:protein_coding transcript_biotype:processed_transcript] // chr1 …
TC0100009032.hg.1	TC0100009032.hg.1	chr1	+	92080305	92147841	10	main	Multiple_Complex	NM_183242 // RefSeq // Homo sapiens BTB (POZ) domain containing 8 (BTBD8), mRNA. // chr1 // 100 // 100 // 0 // --- // 0 /// ENST00000342818 // ENSEMBL // BTB (POZ) domain containing 8 [gene_biotype:protein_coding transcript_biotype:protein_coding] // chr1 // 100 // 100 // 0 // --- // 0 /// ENST00000370382 // ENSEMBL // BTB (POZ) domain containing 8 [gene_biotype:protein_coding transcript_biotype:…
TC0100009035.hg.1	TC0100009035.hg.1	chr1	+	92167052	92184723	10	main	Coding	NM_015237 // RefSeq // Homo sapiens KIAA1107 (KIAA1107), mRNA. // chr1 // 100 // 100 // 0 // --- // 0 /// ENST00000370378 // ENSEMBL // KIAA1107 [gene_biotype:protein_coding transcript_biotype:protein_coding] // chr1 // 100 // 100 // 0 // --- // 0 /// OTTHUMT00000028375 // Havana transcript // KIAA1107[gene_biotype:protein_coding transcript_biotype:protein_coding] // chr1 // 100 // 100 // 0 // --…
TC0100009038.hg.1	TC0100009038.hg.1	chr1	+	92217940	92245813	10	main	Coding	NM_001012425 // RefSeq // Homo sapiens chromosome 1 open reading frame 146 (C1orf146), mRNA. // chr1 // 100 // 100 // 0 // --- // 0 /// ENST00000370373 // ENSEMBL // chromosome 1 open reading frame 146 [gene_biotype:protein_coding transcript_biotype:protein_coding] // chr1 // 100 // 100 // 0 // --- // 0 /// ENST00000370375 // ENSEMBL // chromosome 1 open reading frame 146 [gene_biotype:protein_co…
TC0100009040.hg.1	TC0100009040.hg.1	chr1	+	92298965	92402057	10	main	Multiple_Complex	NM_024813 // RefSeq // Homo sapiens RNA polymerase II associated protein 2 (RPAP2), mRNA. // chr1 // 100 // 100 // 0 // --- // 0 /// ENST00000477322 // ENSEMBL // RNA polymerase II associated protein 2 [gene_biotype:protein_coding transcript_biotype:retained_intron] // chr1 // 100 // 100 // 0 // --- // 0 /// ENST00000484158 // ENSEMBL // RNA polymerase II associated protein 2 [gene_biotype:protei…
TC0100009046.hg.1	TC0100009046.hg.1	chr1	+	92832025	92841924	10	main	Multiple_Complex	NM_000969 // RefSeq // Homo sapiens ribosomal protein L5 (RPL5), mRNA. // chr1 // 100 // 100 // 0 // --- // 0 /// NR_000006 // RefSeq // Homo sapiens small nucleolar RNA, C/D box 21 (SNORD21), small nucleolar RNA. // chr1 // 100 // 100 // 0 // --- // 0 /// NR_002444 // RefSeq // Homo sapiens small nucleolar RNA, H/ACA box 66 (SNORA66), small nucleolar RNA. // chr1 // 100 // 100 // 0 // --- // 0 /…
TC0100009048.hg.1	TC0100009048.hg.1	chr1	+	92839497	92839610	6	main	NonCoding	hsa_circ_0000092 // circbase // Memczak2013 ALT_ACCEPTOR, ALT_DONOR, coding, INTERNAL, intronic best transcript NM_000969 // chr1 // 100 // 100 // 0 // --- // 0
TC0100009054.hg.1	TC0100009054.hg.1	chr1	+	93079235	93139081	10	main	Multiple_Complex	NM_001164391 // RefSeq // Homo sapiens metal response element binding transcription factor 2 (MTF2), transcript variant 3, mRNA. // chr1 // 100 // 100 // 0 // --- // 0 /// NM_001164392 // RefSeq // Homo sapiens metal response element binding transcription factor 2 (MTF2), transcript variant 2, mRNA. // chr1 // 100 // 100 // 0 // --- // 0 /// NM_001164393 // RefSeq // Homo sapiens metal response e…
TC0100009056.hg.1	TC0100009056.hg.1	chr1	+	93179919	93278730	10	main	Multiple_Complex	NM_001306076 // RefSeq // Homo sapiens coiled-coil domain containing 18 (CCDC18), transcript variant 1, mRNA. // chr1 // 100 // 100 // 0 // --- // 0 /// NM_206886 // RefSeq // Homo sapiens coiled-coil domain containing 18 (CCDC18), transcript variant 2, mRNA. // chr1 // 100 // 100 // 0 // --- // 0 /// ENST00000343253 // ENSEMBL // coiled-coil domain containing 18 [gene_biotype:protein_coding tran…
TC0100009061.hg.1	TC0100009061.hg.1	chr1	+	93345888	93369498	10	main	Multiple_Complex	NM_001938 // RefSeq // Homo sapiens down-regulator of transcription 1 (DR1), mRNA. // chr1 // 100 // 100 // 0 // --- // 0 /// ENST00000370267 // ENSEMBL // down-regulator of transcription 1, TBP-binding (negative cofactor 2) [gene_biotype:protein_coding transcript_biotype:protein_coding] // chr1 // 100 // 100 // 0 // --- // 0 /// ENST00000370272 // ENSEMBL // down-regulator of transcription 1, TB…
TC0100009064.hg.1	TC0100009064.hg.1	chr1	+	93448131	93554661	10	main	Multiple_Complex	NM_001024948 // RefSeq // Homo sapiens formin binding protein 1-like (FNBP1L), transcript variant 1, mRNA. // chr1 // 100 // 100 // 0 // --- // 0 /// NM_001164473 // RefSeq // Homo sapiens formin binding protein 1-like (FNBP1L), transcript variant 3, mRNA. // chr1 // 100 // 100 // 0 // --- // 0 /// NM_017737 // RefSeq // Homo sapiens formin binding protein 1-like (FNBP1L), transcript variant 2, m…
TC0100009067.hg.1	TC0100009067.hg.1	chr1	+	93541765	93568183	6	main	Unassigned	FNBP1L.gAug10-unspliced // Ace View // Transcript Identified by AceView, Entrez Gene ID(s) 54874 // chr1 // 100 // 100 // 0 // --- // 0
TC0100009097.hg.1	TC0100009097.hg.1	chr1	+	94418377	94518666	10	main	Multiple_Complex	NM_001122674 // RefSeq // Homo sapiens ATP-binding cassette, sub-family D (ALD), member 3 (ABCD3), transcript variant 2, mRNA. // chr1 // 100 // 100 // 0 // --- // 0 /// NM_002858 // RefSeq // Homo sapiens ATP-binding cassette, sub-family D (ALD), member 3 (ABCD3), transcript variant 1, mRNA. // chr1 // 100 // 100 // 0 // --- // 0 /// ENST00000315713 // ENSEMBL // ATP-binding cassette, sub-family…
TC0100009101.hg.1	TC0100009101.hg.1	chr1	+	94500423	94501322	6	main	Unassigned	ABCD3.rAug10-unspliced // Ace View // Transcript Identified by AceView, Entrez Gene ID(s) 5825 // chr1 // 100 // 100 // 0 // --- // 0
TC0100009102.hg.1	TC0100009102.hg.1	chr1	+	94521491	94522026	6	main	Unassigned	ABCD3.vaAug10-unspliced // Ace View // Transcript Identified by AceView, Entrez Gene ID(s) 5825 // chr1 // 100 // 100 // 0 // --- // 0
TC0100009109.hg.1	TC0100009109.hg.1	chr1	+	94820342	94895247	10	main	Multiple_Complex	NM_001114106 // RefSeq // Homo sapiens solute carrier family 44, member 3 (SLC44A3), transcript variant 1, mRNA. // chr1 // 100 // 100 // 0 // --- // 0 /// NM_001258340 // RefSeq // Homo sapiens solute carrier family 44, member 3 (SLC44A3), transcript variant 3, mRNA. // chr1 // 100 // 100 // 0 // --- // 0 /// NM_001258341 // RefSeq // Homo sapiens solute carrier family 44, member 3 (SLC44A3), tr…
TC0100009112.hg.1	TC0100009112.hg.1	chr1	+	94927298	94967461	10	main	NonCoding	NR_033998 // RefSeq // Homo sapiens hCG2028352-like (LOC729970), long non-coding RNA. // chr1 // 100 // 100 // 0 // --- // 0 /// ENST00000438509 // ENSEMBL // havana:known chromosome:GRCh38:1:94928028:94963270:1 gene:ENSG00000235501 gene_biotype:antisense transcript_biotype:antisense // chr1 // 100 // 100 // 0 // --- // 0 /// ENST00000452846 // ENSEMBL // havana:known chromosome:GRCh38:1:94927566…
TC0100009116.hg.1	TC0100009116.hg.1	chr1	+	95092517	95247225	10	main	Multiple_Complex	NM_001128142 // RefSeq // Homo sapiens RWD domain containing 3 (RWDD3), transcript variant 2, mRNA. // chr1 // 100 // 100 // 0 // --- // 0 /// NM_001199679 // RefSeq // Homo sapiens transmembrane protein 56 (TMEM56), transcript variant 1, mRNA. // chr1 // 100 // 100 // 0 // --- // 0 /// NM_001199682 // RefSeq // Homo sapiens RWD domain containing 3 (RWDD3), transcript variant 3, mRNA. // chr1 // …
TC0100009142.hg.1	TC0100009142.hg.1	chr1	+	96721605	96823738	10	main	Multiple_Complex	NM_001300985 // RefSeq // Homo sapiens polypyrimidine tract binding protein 2 (PTBP2), transcript variant 1, mRNA. // chr1 // 100 // 100 // 0 // --- // 0 /// NM_001300986 // RefSeq // Homo sapiens polypyrimidine tract binding protein 2 (PTBP2), transcript variant 2, mRNA. // chr1 // 100 // 100 // 0 // --- // 0 /// NM_001300987 // RefSeq // Homo sapiens polypyrimidine tract binding protein 2 (PTBP…
TC0100009149.hg.1	TC0100009149.hg.1	chr1	+	96801934	96804763	6	main	Unassigned	PTBP2.oAug10-unspliced // Ace View // Transcript Identified by AceView, Entrez Gene ID(s) 58155 // chr1 // 100 // 100 // 0 // --- // 0
TC0100009176.hg.1	TC0100009176.hg.1	chr1	+	98661680	98760500	10	main	Multiple_Complex	NM_015976 // RefSeq // Homo sapiens sorting nexin 7 (SNX7), transcript variant 1, mRNA. // chr1 // 100 // 100 // 0 // --- // 0 /// NM_152238 // RefSeq // Homo sapiens sorting nexin 7 (SNX7), transcript variant 2, mRNA. // chr1 // 100 // 100 // 0 // --- // 0 /// NR_033716 // RefSeq // Homo sapiens sorting nexin 7 (SNX7), transcript variant 3, non-coding RNA. // chr1 // 100 // 100 // 0 // --- // 0 …
TC0100009181.hg.1	TC0100009181.hg.1	chr1	+	99263953	99309590	10	main	Multiple_Complex	NM_001166252 // RefSeq // Homo sapiens phospholipid phosphatase related 4 (PLPPR4), transcript variant 2, mRNA. // chr1 // 100 // 100 // 0 // --- // 0 /// NM_014839 // RefSeq // Homo sapiens phospholipid phosphatase related 4 (PLPPR4), transcript variant 1, mRNA. // chr1 // 100 // 100 // 0 // --- // 0 /// ENST00000370184 // ENSEMBL // Lipid phosphate phosphatase-related protein type 4 [gene_bioty…
TC0100009183.hg.1	TC0100009183.hg.1	chr1	+	99645875	99694541	10	main	Multiple_Complex	NM_017734 // RefSeq // Homo sapiens palmdelphin (PALMD), mRNA. // chr1 // 100 // 100 // 0 // --- // 0 /// ENST00000263174 // ENSEMBL // palmdelphin [gene_biotype:protein_coding transcript_biotype:protein_coding] // chr1 // 100 // 100 // 0 // --- // 0 /// ENST00000496843 // ENSEMBL // palmdelphin [gene_biotype:protein_coding transcript_biotype:retained_intron] // chr1 // 100 // 100 // 0 // --- // …
TC0100009191.hg.1	TC0100009191.hg.1	chr1	+	99850084	99924023	10	main	Multiple_Complex	NM_000028 // RefSeq // Homo sapiens amylo-alpha-1, 6-glucosidase, 4-alpha-glucanotransferase (AGL), transcript variant 4, mRNA. // chr1 // 100 // 100 // 0 // --- // 0 /// NM_000642 // RefSeq // Homo sapiens amylo-alpha-1, 6-glucosidase, 4-alpha-glucanotransferase (AGL), transcript variant 1, mRNA. // chr1 // 100 // 100 // 0 // --- // 0 /// NM_000643 // RefSeq // Homo sapiens amylo-alpha-1, 6-gluc…
TC0100009195.hg.1	TC0100009195.hg.1	chr1	+	99969789	100026979	10	main	Multiple_Complex	NM_001271684 // RefSeq // Homo sapiens solute carrier family 35 (UDP-N-acetylglucosamine (UDP-GlcNAc) transporter), member A3 (SLC35A3), transcript variant 2, mRNA. // chr1 // 100 // 100 // 0 // --- // 0 /// NM_001271685 // RefSeq // Homo sapiens solute carrier family 35 (UDP-N-acetylglucosamine (UDP-GlcNAc) transporter), member A3 (SLC35A3), transcript variant 3, mRNA. // chr1 // 100 // 100 // 0…
TC0100009199.hg.1	TC0100009199.hg.1	chr1	+	100038097	100083377	10	main	Multiple_Complex	NM_033055 // RefSeq // Homo sapiens hippocampus abundant transcript 1 (HIAT1), mRNA. // chr1 // 100 // 100 // 0 // --- // 0 /// ENST00000370152 // ENSEMBL // hippocampus abundant transcript 1 [gene_biotype:protein_coding transcript_biotype:protein_coding] // chr1 // 100 // 100 // 0 // --- // 0 /// ENST00000421661 // ENSEMBL // hippocampus abundant transcript 1 [gene_biotype:protein_coding transcr…
TC0100009204.hg.1	TC0100009204.hg.1	chr1	+	100133150	100150498	10	main	Multiple_Complex	NM_019083 // RefSeq // Homo sapiens tRNA methyltransferase 13 homolog (S. cerevisiae) (TRMT13), mRNA. // chr1 // 100 // 100 // 0 // --- // 0 /// ENST00000370139 // ENSEMBL // tRNA methyltransferase 13 homolog (S. cerevisiae) [gene_biotype:protein_coding transcript_biotype:protein_coding] // chr1 // 100 // 100 // 0 // --- // 0 /// ENST00000370141 // ENSEMBL // tRNA methyltransferase 13 homolog (S.…
TC0100009211.hg.1	TC0100009211.hg.1	chr1	+	100266158	100292769	10	main	Multiple_Complex	NM_001130841 // RefSeq // Homo sapiens RNA 3-terminal phosphate cyclase (RTCA), transcript variant 1, mRNA. // chr1 // 100 // 100 // 0 // --- // 0 /// NM_003729 // RefSeq // Homo sapiens RNA 3-terminal phosphate cyclase (RTCA), transcript variant 2, mRNA. // chr1 // 100 // 100 // 0 // --- // 0 /// ENST00000260563 // ENSEMBL // RNA 3'-terminal phosphate cyclase [gene_biotype:protein_coding transcr…
TC0100009215.hg.1	TC0100009215.hg.1	chr1	+	100351734	100520277	10	main	Multiple_Complex	NM_003672 // RefSeq // Homo sapiens cell division cycle 14A (CDC14A), transcript variant 1, mRNA. // chr1 // 100 // 100 // 0 // --- // 0 /// NM_033312 // RefSeq // Homo sapiens cell division cycle 14A (CDC14A), transcript variant 2, mRNA. // chr1 // 100 // 100 // 0 // --- // 0 /// NM_033313 // RefSeq // Homo sapiens cell division cycle 14A (CDC14A), transcript variant 3, mRNA. // chr1 // 100 // 1…
TC0100009218.hg.1	TC0100009218.hg.1	chr1	+	100538137	100542027	10	main	Coding	NM_022049 // RefSeq // Homo sapiens G protein-coupled receptor 88 (GPR88), mRNA. // chr1 // 100 // 100 // 0 // --- // 0 /// ENST00000315033 // ENSEMBL // G protein-coupled receptor 88 [gene_biotype:protein_coding transcript_biotype:protein_coding] // chr1 // 100 // 100 // 0 // --- // 0 /// OTTHUMT00000030212 // Havana transcript // G protein-coupled receptor 88[gene_biotype:protein_coding transcr…
TC0100009221.hg.1	TC0100009221.hg.1	chr1	+	100719640	100739046	10	main	Multiple_Complex	NM_001078 // RefSeq // Homo sapiens vascular cell adhesion molecule 1 (VCAM1), transcript variant 1, mRNA. // chr1 // 100 // 100 // 0 // --- // 0 /// NM_001199834 // RefSeq // Homo sapiens vascular cell adhesion molecule 1 (VCAM1), transcript variant 3, mRNA. // chr1 // 100 // 100 // 0 // --- // 0 /// NM_080682 // RefSeq // Homo sapiens vascular cell adhesion molecule 1 (VCAM1), transcript varian…
TC0100009226.hg.1	TC0100009226.hg.1	chr1	+	100896076	100981755	10	main	Multiple_Complex	NM_001144884 // RefSeq // Homo sapiens solute carrier family 30 (zinc transporter), member 7 (SLC30A7), transcript variant 2, mRNA. // chr1 // 100 // 100 // 0 // --- // 0 /// NM_133496 // RefSeq // Homo sapiens solute carrier family 30 (zinc transporter), member 7 (SLC30A7), transcript variant 1, mRNA. // chr1 // 100 // 100 // 0 // --- // 0 /// ENST00000357650 // ENSEMBL // solute carrier family …
TC0100009241.hg.1	TC0100009241.hg.1	chr1	+	101236749	101241520	10	main	Multiple_Complex	NM_001400 // RefSeq // Homo sapiens sphingosine-1-phosphate receptor 1 (S1PR1), mRNA. // chr1 // 100 // 100 // 0 // --- // 0 /// ENST00000305352 // ENSEMBL // sphingosine-1-phosphate receptor 1 [gene_biotype:protein_coding transcript_biotype:protein_coding] // chr1 // 100 // 100 // 0 // --- // 0 /// ENST00000475289 // ENSEMBL // sphingosine-1-phosphate receptor 1 [gene_biotype:protein_coding tran…
TC0100009273.hg.1	TC0100009273.hg.1	chr1	+	103616811	103625780	10	main	Multiple_Complex	NM_000699 // RefSeq // Homo sapiens amylase, alpha 2A (pancreatic) (AMY2A), mRNA. // chr1 // 100 // 100 // 0 // --- // 0 /// ENST00000414303 // ENSEMBL // amylase, alpha 2A (pancreatic) [gene_biotype:protein_coding transcript_biotype:protein_coding] // chr1 // 100 // 100 // 0 // --- // 0 /// ENST00000423678 // ENSEMBL // amylase, alpha 2A (pancreatic) [gene_biotype:protein_coding transcript_bioty…
TC0100009274.hg.1	TC0100009274.hg.1	chr1	+	103655290	103664554	10	main	Multiple_Complex	NM_001008219 // RefSeq // Homo sapiens amylase, alpha 1C (salivary) (AMY1C), mRNA. // chr1 // 100 // 100 // 0 // --- // 0 /// ENST00000370083 // ENSEMBL // amylase, alpha 1A (salivary) [gene_biotype:protein_coding transcript_biotype:protein_coding] // chr1 // 100 // 100 // 0 // --- // 0 /// ENST00000422549 // ENSEMBL // amylase, alpha 1A (salivary) [gene_biotype:protein_coding transcript_biotype:…
TC0100009276.hg.1	TC0100009276.hg.1	chr1	+	103749657	103758690	10	main	Coding	NM_001008221 // RefSeq // Homo sapiens amylase, alpha 1A (salivary) (AMY1A), transcript variant 2, mRNA. // chr1 // 100 // 100 // 0 // --- // 0 /// ENST00000370079 // ENSEMBL // amylase, alpha 1C (salivary) [gene_biotype:protein_coding transcript_biotype:protein_coding] // chr1 // 100 // 100 // 0 // --- // 0 /// OTTHUMT00000030375 // Havana transcript // amylase, alpha 1C (salivary)[gene_biotype:…
TC0100009305.hg.1	TC0100009305.hg.1	chr1	+	107056645	107059296	10	main	Coding	NM_018137 // RefSeq // Homo sapiens protein arginine methyltransferase 6 (PRMT6), mRNA. // chr1 // 100 // 100 // 0 // --- // 0 /// ENST00000370078 // ENSEMBL // protein arginine methyltransferase 6 [gene_biotype:protein_coding transcript_biotype:protein_coding] // chr1 // 100 // 100 // 0 // --- // 0 /// BC002729 // GenBank // Homo sapiens protein arginine methyltransferase 6, mRNA (cDNA clone MGC…
TC0100009307.hg.1	TC0100009307.hg.1	chr1	+	107140007	107484899	10	main	Multiple_Complex	NM_001113226 // RefSeq // Homo sapiens netrin G1 (NTNG1), transcript variant 1, mRNA. // chr1 // 100 // 100 // 0 // --- // 0 /// NM_001113228 // RefSeq // Homo sapiens netrin G1 (NTNG1), transcript variant 2, mRNA. // chr1 // 100 // 100 // 0 // --- // 0 /// NM_014917 // RefSeq // Homo sapiens netrin G1 (NTNG1), transcript variant 3, mRNA. // chr1 // 100 // 100 // 0 // --- // 0 /// ENST00000294649…
TC0100009324.hg.1	TC0100009324.hg.1	chr1	+	108560089	108644900	10	main	Multiple_Complex	NM_001010883 // RefSeq // Homo sapiens family with sequence similarity 102, member B (FAM102B), mRNA. // chr1 // 100 // 100 // 0 // --- // 0 /// ENST00000370035 // ENSEMBL // family with sequence similarity 102, member B [gene_biotype:protein_coding transcript_biotype:protein_coding] // chr1 // 100 // 100 // 0 // --- // 0 /// ENST00000405454 // ENSEMBL // family with sequence similarity 102, memb…
TC0100009328.hg.1	TC0100009328.hg.1	chr1	+	108692310	108701803	10	main	Multiple_Complex	NM_018061 // RefSeq // Homo sapiens pre-mRNA processing factor 38B (PRPF38B), transcript variant 1, mRNA. // chr1 // 100 // 100 // 0 // --- // 0 /// NR_037185 // RefSeq // Homo sapiens pre-mRNA processing factor 38B (PRPF38B), transcript variant 2, non-coding RNA. // chr1 // 100 // 100 // 0 // --- // 0 /// ENST00000370021 // ENSEMBL // pre-mRNA processing factor 38B [gene_biotype:protein_coding t…
TC0100009329.hg.1	TC0100009329.hg.1	chr1	+	108712657	108742745	10	main	Multiple_Complex	NM_001144937 // RefSeq // Homo sapiens fibronectin type III domain containing 7 (FNDC7), mRNA. // chr1 // 100 // 100 // 0 // --- // 0 /// ENST00000370017 // ENSEMBL // fibronectin type III domain containing 7 [gene_biotype:protein_coding transcript_biotype:protein_coding] // chr1 // 100 // 100 // 0 // --- // 0 /// ENST00000445274 // ENSEMBL // fibronectin type III domain containing 7 [gene_biotyp…
TC0100009331.hg.1	TC0100009331.hg.1	chr1	+	108746663	108809526	10	main	Multiple_Complex	NM_007269 // RefSeq // Homo sapiens syntaxin binding protein 3 (STXBP3), mRNA. // chr1 // 100 // 100 // 0 // --- // 0 /// ENST00000370008 // ENSEMBL // syntaxin binding protein 3 [gene_biotype:protein_coding transcript_biotype:protein_coding] // chr1 // 100 // 100 // 0 // --- // 0 /// ENST00000469338 // ENSEMBL // syntaxin binding protein 3 [gene_biotype:protein_coding transcript_biotype:retained…
TC0100009333.hg.1	TC0100009333.hg.1	chr1	+	108875350	108934545	10	main	Multiple_Complex	NM_013296 // RefSeq // Homo sapiens G-protein signaling modulator 2 (GPSM2), mRNA. // chr1 // 100 // 100 // 0 // --- // 0 /// ENST00000264126 // ENSEMBL // G-protein signaling modulator 2 [gene_biotype:protein_coding transcript_biotype:protein_coding] // chr1 // 100 // 100 // 0 // --- // 0 /// ENST00000406462 // ENSEMBL // G-protein signaling modulator 2 [gene_biotype:protein_coding transcript_bi…
TC0100009339.hg.1	TC0100009339.hg.1	chr1	+	109089803	109096934	10	main	Multiple_Complex	NM_020141 // RefSeq // Homo sapiens transmembrane protein 167B (TMEM167B), mRNA. // chr1 // 100 // 100 // 0 // --- // 0 /// ENST00000338272 // ENSEMBL // transmembrane protein 167B [gene_biotype:protein_coding transcript_biotype:protein_coding] // chr1 // 100 // 100 // 0 // --- // 0 /// ENST00000473828 // ENSEMBL // transmembrane protein 167B [gene_biotype:protein_coding transcript_biotype:proces…
TC0100009341.hg.1	TC0100009341.hg.1	chr1	+	109113679	109206781	10	main	Multiple_Complex	NM_001267048 // RefSeq // Homo sapiens KIAA1324 (KIAA1324), transcript variant 2, mRNA. // chr1 // 100 // 100 // 0 // --- // 0 /// NM_001284352 // RefSeq // Homo sapiens KIAA1324 (KIAA1324), transcript variant 4, mRNA. // chr1 // 100 // 100 // 0 // --- // 0 /// NM_001284353 // RefSeq // Homo sapiens KIAA1324 (KIAA1324), transcript variant 5, mRNA. // chr1 // 100 // 100 // 0 // --- // 0 /// NM_020…
TC0100009344.hg.1	TC0100009344.hg.1	chr1	+	109213893	109238182	10	main	Multiple_Complex	NM_006513 // RefSeq // Homo sapiens seryl-tRNA synthetase (SARS), transcript variant 1, mRNA. // chr1 // 100 // 100 // 0 // --- // 0 /// NR_034072 // RefSeq // Homo sapiens seryl-tRNA synthetase (SARS), transcript variant 2, non-coding RNA. // chr1 // 100 // 100 // 0 // --- // 0 /// ENST00000234677 // ENSEMBL // seryl-tRNA synthetase [gene_biotype:protein_coding transcript_biotype:protein_coding]…
TC0100009345.hg.1	TC0100009345.hg.1	chr1	+	109250019	109275756	10	main	Multiple_Complex	NM_001408 // RefSeq // Homo sapiens cadherin, EGF LAG seven-pass G-type receptor 2 (CELSR2), mRNA. // chr1 // 100 // 100 // 0 // --- // 0 /// ENST00000271332 // ENSEMBL // cadherin, EGF LAG seven-pass G-type receptor 2 [gene_biotype:protein_coding transcript_biotype:protein_coding] // chr1 // 100 // 100 // 0 // --- // 0 /// ENST00000459940 // ENSEMBL // cadherin, EGF LAG seven-pass G-type recepto…
TC0100009352.hg.1	TC0100009352.hg.1	chr1	+	109466478	109482142	10	main	Multiple_Complex	NM_001040709 // RefSeq // Homo sapiens synaptophysin-like 2 (SYPL2), mRNA. // chr1 // 100 // 100 // 0 // --- // 0 /// ENST00000369872 // ENSEMBL // synaptophysin-like 2 [gene_biotype:protein_coding transcript_biotype:protein_coding] // chr1 // 100 // 100 // 0 // --- // 0 /// ENST00000475497 // ENSEMBL // synaptophysin-like 2 [gene_biotype:protein_coding transcript_biotype:processed_transcript] //…
TC0100009353.hg.1	TC0100009353.hg.1	chr1	+	109483479	109492804	10	main	Multiple_Complex	NM_153340 // RefSeq // Homo sapiens ataxin 7-like 2 (ATXN7L2), mRNA. // chr1 // 100 // 100 // 0 // --- // 0 /// ENST00000369869 // ENSEMBL // ataxin 7-like 2 [gene_biotype:protein_coding transcript_biotype:retained_intron] // chr1 // 100 // 100 // 0 // --- // 0 /// ENST00000369870 // ENSEMBL // ataxin 7-like 2 [gene_biotype:protein_coding transcript_biotype:protein_coding] // chr1 // 100 // 100 /…
TC0100009354.hg.1	TC0100009354.hg.1	chr1	+	109494036	109502932	10	main	Coding	NM_001134400 // RefSeq // Homo sapiens cytochrome b561 family, member D1 (CYB561D1), transcript variant 1, mRNA. // chr1 // 100 // 100 // 0 // --- // 0 /// NM_001134402 // RefSeq // Homo sapiens cytochrome b561 family, member D1 (CYB561D1), transcript variant 3, mRNA. // chr1 // 100 // 100 // 0 // --- // 0 /// NM_001134403 // RefSeq // Homo sapiens cytochrome b561 family, member D1 (CYB561D1), tr…
TC0100009355.hg.1	TC0100009355.hg.1	chr1	+	109539872	109548406	10	main	Multiple_Complex	NM_031936 // RefSeq // Homo sapiens G protein-coupled receptor 61 (GPR61), mRNA. // chr1 // 100 // 100 // 0 // --- // 0 /// ENST00000404129 // ENSEMBL // G protein-coupled receptor 61 [gene_biotype:protein_coding transcript_biotype:nonsense_mediated_decay] // chr1 // 100 // 100 // 0 // --- // 0 /// ENST00000469383 // ENSEMBL // G protein-coupled receptor 61 [gene_biotype:protein_coding transcript…
TC0100009364.hg.1	TC0100009364.hg.1	chr1	+	109910242	109930994	10	main	Multiple_Complex	NM_000757 // RefSeq // Homo sapiens colony stimulating factor 1 (macrophage) (CSF1), transcript variant 1, mRNA. // chr1 // 100 // 100 // 0 // --- // 0 /// NM_172210 // RefSeq // Homo sapiens colony stimulating factor 1 (macrophage) (CSF1), transcript variant 2, mRNA. // chr1 // 100 // 100 // 0 // --- // 0 /// NM_172211 // RefSeq // Homo sapiens colony stimulating factor 1 (macrophage) (CSF1), tr…
TC0100009365.hg.1	TC0100009365.hg.1	chr1	+	109984686	110023742	10	main	Multiple_Complex	NM_001242673 // RefSeq // Homo sapiens adenosylhomocysteinase-like 1 (AHCYL1), transcript variant 2, mRNA. // chr1 // 100 // 100 // 0 // --- // 0 /// NM_001242674 // RefSeq // Homo sapiens adenosylhomocysteinase-like 1 (AHCYL1), transcript variant 3, mRNA. // chr1 // 100 // 100 // 0 // --- // 0 /// NM_001242675 // RefSeq // Homo sapiens adenosylhomocysteinase-like 1 (AHCYL1), transcript variant 4…
TC0100009366.hg.1	TC0100009366.hg.1	chr1	+	110031577	110074641	10	main	Multiple_Complex	NM_001270768 // RefSeq // Homo sapiens striatin interacting protein 1 (STRIP1), transcript variant 2, mRNA. // chr1 // 100 // 100 // 0 // --- // 0 /// NM_033088 // RefSeq // Homo sapiens striatin interacting protein 1 (STRIP1), transcript variant 1, mRNA. // chr1 // 100 // 100 // 0 // --- // 0 /// NR_073071 // RefSeq // Homo sapiens striatin interacting protein 1 (STRIP1), transcript variant 3, n…
TC0100009370.hg.1	TC0100009370.hg.1	chr1	+	110112440	110113947	10	main	Coding	NM_203412 // RefSeq // Homo sapiens ubiquitin-like 4B (UBL4B), mRNA. // chr1 // 100 // 100 // 0 // --- // 0 /// ENST00000334179 // ENSEMBL // ubiquitin-like 4B [gene_biotype:protein_coding transcript_biotype:protein_coding] // chr1 // 100 // 100 // 0 // --- // 0 /// BC058929 // GenBank // Homo sapiens ubiquitin-like 4B, mRNA (cDNA clone MGC:65142 IMAGE:5741847), complete cds. // chr1 // 100 // 10…
TC0100009373.hg.1	TC0100009373.hg.1	chr1	+	110150486	110202202	10	main	Multiple_Complex	NM_001010898 // RefSeq // Homo sapiens solute carrier family 6 (neutral amino acid transporter), member 17 (SLC6A17), mRNA. // chr1 // 100 // 100 // 0 // --- // 0 /// ENST00000331565 // ENSEMBL // solute carrier family 6 (neutral amino acid transporter), member 17 [gene_biotype:protein_coding transcript_biotype:protein_coding] // chr1 // 100 // 100 // 0 // --- // 0 /// ENST00000465159 // ENSEMBL …
TC0100009383.hg.1	TC0100009383.hg.1	chr1	+	110338506	110346681	10	main	Coding	NM_001201545 // RefSeq // Homo sapiens RNA binding motif protein 15 (RBM15), transcript variant 2, mRNA. // chr1 // 100 // 100 // 0 // --- // 0 /// NM_022768 // RefSeq // Homo sapiens RNA binding motif protein 15 (RBM15), transcript variant 1, mRNA. // chr1 // 100 // 100 // 0 // --- // 0 /// ENST00000369784 // ENSEMBL // RNA binding motif protein 15 [gene_biotype:protein_coding transcript_biotype…
TC0100009386.hg.1	TC0100009386.hg.1	chr1	+	110451166	110457354	10	main	Coding	NM_032414 // RefSeq // Homo sapiens prokineticin 1 (PROK1), mRNA. // chr1 // 100 // 100 // 0 // --- // 0 /// ENST00000271331 // ENSEMBL // prokineticin 1 [gene_biotype:protein_coding transcript_biotype:protein_coding] // chr1 // 100 // 100 // 0 // --- // 0 /// BC025399 // GenBank // Homo sapiens prokineticin 1, mRNA (cDNA clone MGC:27084 IMAGE:4826496), complete cds. // chr1 // 100 // 100 // 0 //…
TC0100009394.hg.1	TC0100009394.hg.1	chr1	+	110871199	110899936	10	main	Multiple_Complex	NM_000560 // RefSeq // Homo sapiens CD53 molecule (CD53), transcript variant 2, mRNA. // chr1 // 100 // 100 // 0 // --- // 0 /// NM_001040033 // RefSeq // Homo sapiens CD53 molecule (CD53), transcript variant 1, mRNA. // chr1 // 100 // 100 // 0 // --- // 0 /// ENST00000271324 // ENSEMBL // CD53 molecule [gene_biotype:protein_coding transcript_biotype:protein_coding] // chr1 // 100 // 100 // 0 // …
TC0100009395.hg.1	TC0100009395.hg.1	chr1	+	110887809	110888074	6	main	NonCoding	hsa_circ_0000104 // circbase // Memczak2013 ALT_ACCEPTOR, ALT_DONOR, coding, INTERNAL, intronic best transcript NM_001040033 // chr1 // 100 // 100 // 0 // --- // 0
TC0100009402.hg.1	TC0100009402.hg.1	chr1	+	111139627	111185102	10	main	Multiple_Complex	NM_001007794 // RefSeq // Homo sapiens choline/ethanolamine phosphotransferase 1 (CEPT1), transcript variant 2, mRNA. // chr1 // 100 // 100 // 0 // --- // 0 /// NM_006090 // RefSeq // Homo sapiens choline/ethanolamine phosphotransferase 1 (CEPT1), transcript variant 1, mRNA. // chr1 // 100 // 100 // 0 // --- // 0 /// ENST00000357172 // ENSEMBL // choline/ethanolamine phosphotransferase 1 [gene_bi…
TC0100009403.hg.1	TC0100009403.hg.1	chr1	+	111200771	111243440	10	main	Multiple_Complex	NM_001025197 // RefSeq // Homo sapiens chitinase 3-like 2 (CHI3L2), transcript variant 2, mRNA. // chr1 // 100 // 100 // 0 // --- // 0 /// NM_001025199 // RefSeq // Homo sapiens chitinase 3-like 2 (CHI3L2), transcript variant 3, mRNA. // chr1 // 100 // 100 // 0 // --- // 0 /// NM_004000 // RefSeq // Homo sapiens chitinase 3-like 2 (CHI3L2), transcript variant 1, mRNA. // chr1 // 100 // 100 // 0 /…
TC0100009406.hg.1	TC0100009406.hg.1	chr1	+	111290852	111320566	10	main	Multiple_Complex	NM_001040623 // RefSeq // Homo sapiens chitinase, acidic (CHIA), transcript variant 3, mRNA. // chr1 // 100 // 100 // 0 // --- // 0 /// NM_001258001 // RefSeq // Homo sapiens chitinase, acidic (CHIA), transcript variant 5, mRNA. // chr1 // 100 // 100 // 0 // --- // 0 /// NM_001258002 // RefSeq // Homo sapiens chitinase, acidic (CHIA), transcript variant 6, mRNA. // chr1 // 100 // 100 // 0 // --- …
TC0100009408.hg.1	TC0100009408.hg.1	chr1	+	111346288	111353017	10	main	Multiple_Complex	NM_001300831 // RefSeq // Homo sapiens primary cilia formation (PIFO), transcript variant 2, mRNA. // chr1 // 100 // 100 // 0 // --- // 0 /// NM_181643 // RefSeq // Homo sapiens primary cilia formation (PIFO), transcript variant 1, mRNA. // chr1 // 100 // 100 // 0 // --- // 0 /// NR_125338 // RefSeq // Homo sapiens primary cilia formation (PIFO), transcript variant 3, non-coding RNA. // chr1 // 1…
TC0100009414.hg.1	TC0100009414.hg.1	chr1	+	111448864	111462773	10	main	Multiple_Complex	NM_001688 // RefSeq // Homo sapiens ATP synthase, H+ transporting, mitochondrial Fo complex, subunit B1 (ATP5F1), mRNA. // chr1 // 100 // 100 // 0 // --- // 0 /// ENST00000369721 // ENSEMBL // ATP synthase, H+ transporting, mitochondrial Fo complex, subunit B1 [gene_biotype:protein_coding transcript_biotype:processed_transcript] // chr1 // 100 // 100 // 0 // --- // 0 /// ENST00000369722 // ENSEMB…
TC0100009417.hg.1	TC0100009417.hg.1	chr1	+	111473792	111478512	10	main	Multiple_Complex	NM_001300834 // RefSeq // Homo sapiens chromosome 1 open reading frame 162 (C1orf162), transcript variant 2, mRNA. // chr1 // 100 // 100 // 0 // --- // 0 /// NM_001300835 // RefSeq // Homo sapiens chromosome 1 open reading frame 162 (C1orf162), transcript variant 3, mRNA. // chr1 // 100 // 100 // 0 // --- // 0 /// NM_174896 // RefSeq // Homo sapiens chromosome 1 open reading frame 162 (C1orf162),…
TC0100009418.hg.1	TC0100009418.hg.1	chr1	+	111542218	111716695	10	main	Multiple_Complex	NM_001010935 // RefSeq // Homo sapiens RAP1A, member of RAS oncogene family (RAP1A), transcript variant 1, mRNA. // chr1 // 100 // 100 // 0 // --- // 0 /// NM_001291896 // RefSeq // Homo sapiens RAP1A, member of RAS oncogene family (RAP1A), transcript variant 3, mRNA. // chr1 // 100 // 100 // 0 // --- // 0 /// NM_002884 // RefSeq // Homo sapiens RAP1A, member of RAS oncogene family (RAP1A), trans…
TC0100009428.hg.1	TC0100009428.hg.1	chr1	+	111755245	111768016	10	main	Multiple_Complex	NM_007204 // RefSeq // Homo sapiens DEAD (Asp-Glu-Ala-Asp) box polypeptide 20 (DDX20), mRNA. // chr1 // 100 // 100 // 0 // --- // 0 /// ENST00000369702 // ENSEMBL // DEAD (Asp-Glu-Ala-Asp) box polypeptide 20 [gene_biotype:protein_coding transcript_biotype:protein_coding] // chr1 // 100 // 100 // 0 // --- // 0 /// ENST00000475700 // ENSEMBL // DEAD (Asp-Glu-Ala-Asp) box polypeptide 20 [gene_biotyp…
TC0100009433.hg.1	TC0100009433.hg.1	chr1	+	111989770	111998842	10	main	Multiple_Complex	NM_001270945 // RefSeq // Homo sapiens uncharacterized LOC643355 (LOC643355), mRNA. // chr1 // 100 // 100 // 0 // --- // 0 /// ENST00000428461.1 // lncRNAWiki // N/A // chr1 // 100 // 100 // 0 // --- // 0 /// ENST00000438293.1 // lncRNAWiki // N/A // chr1 // 100 // 100 // 0 // --- // 0 /// ENST00000442751.1 // lncRNAWiki // N/A // chr1 // 100 // 100 // 0 // --- // 0 /// OTTHUMT00000033148 // Hava…
TC0100009441.hg.1	TC0100009441.hg.1	chr1	+	112396178	112463456	10	main	Multiple_Complex	NM_018704 // RefSeq // Homo sapiens CTTNBP2 N-terminal like (CTTNBP2NL), mRNA. // chr1 // 100 // 100 // 0 // --- // 0 /// ENST00000271277 // ENSEMBL // CTTNBP2 N-terminal like [gene_biotype:protein_coding transcript_biotype:protein_coding] // chr1 // 100 // 100 // 0 // --- // 0 /// ENST00000441739 // ENSEMBL // CTTNBP2 N-terminal like [gene_biotype:protein_coding transcript_biotype:protein_coding…
TC0100009442.hg.1	TC0100009442.hg.1	chr1	+	112466541	112530165	10	main	Multiple_Complex	NM_001291880 // RefSeq // Homo sapiens wingless-type MMTV integration site family, member 2B (WNT2B), transcript variant 3, mRNA. // chr1 // 100 // 100 // 0 // --- // 0 /// NM_004185 // RefSeq // Homo sapiens wingless-type MMTV integration site family, member 2B (WNT2B), transcript variant WNT-2B1, mRNA. // chr1 // 100 // 100 // 0 // --- // 0 /// NM_024494 // RefSeq // Homo sapiens wingless-type …
TC0100009444.hg.1	TC0100009444.hg.1	chr1	+	112619173	112671619	10	main	Multiple_Complex	NM_006135 // RefSeq // Homo sapiens capping protein (actin filament) muscle Z-line, alpha 1 (CAPZA1), mRNA. // chr1 // 100 // 100 // 0 // --- // 0 /// ENST00000263168 // ENSEMBL // capping protein (actin filament) muscle Z-line, alpha 1 [gene_biotype:protein_coding transcript_biotype:protein_coding] // chr1 // 100 // 100 // 0 // --- // 0 /// ENST00000466066 // ENSEMBL // capping protein (actin fi…
TC0100009449.hg.1	TC0100009449.hg.1	chr1	+	112673141	112700746	10	main	Multiple_Complex	NM_001130079 // RefSeq // Homo sapiens Mov10 RISC complex RNA helicase (MOV10), transcript variant 2, mRNA. // chr1 // 100 // 100 // 0 // --- // 0 /// NM_001286072 // RefSeq // Homo sapiens Mov10 RISC complex RNA helicase (MOV10), transcript variant 3, mRNA. // chr1 // 100 // 100 // 0 // --- // 0 /// NM_020963 // RefSeq // Homo sapiens Mov10 RISC complex RNA helicase (MOV10), transcript variant 1…
TC0100009452.hg.1	TC0100009452.hg.1	chr1	+	112720419	112727235	10	main	Coding	NM_001004440 // RefSeq // Homo sapiens family with sequence similarity 19 (chemokine (C-C motif)-like), member A3 (FAM19A3), transcript variant 2, mRNA. // chr1 // 100 // 100 // 0 // --- // 0 /// NM_182759 // RefSeq // Homo sapiens family with sequence similarity 19 (chemokine (C-C motif)-like), member A3 (FAM19A3), transcript variant 1, mRNA. // chr1 // 100 // 100 // 0 // --- // 0 /// ENST000003…
TC0100009468.hg.1	TC0100009468.hg.1	chr1	+	113073170	113132260	10	main	Multiple_Complex	NM_014813 // RefSeq // Homo sapiens leucine-rich repeats and immunoglobulin-like domains 2 (LRIG2), transcript variant 1, mRNA. // chr1 // 100 // 100 // 0 // --- // 0 /// ENST00000361127 // ENSEMBL // leucine-rich repeats and immunoglobulin-like domains 2 [gene_biotype:protein_coding transcript_biotype:protein_coding] // chr1 // 100 // 100 // 0 // --- // 0 /// ENST00000466069 // ENSEMBL // leucin…
TC0100009474.hg.1	TC0100009474.hg.1	chr1	+	113390749	113685923	10	main	Multiple_Complex	NM_001142782 // RefSeq // Homo sapiens membrane associated guanylate kinase, WW and PDZ domain containing 3 (MAGI3), transcript variant 1, mRNA. // chr1 // 100 // 100 // 0 // --- // 0 /// NM_152900 // RefSeq // Homo sapiens membrane associated guanylate kinase, WW and PDZ domain containing 3 (MAGI3), transcript variant 2, mRNA. // chr1 // 100 // 100 // 0 // --- // 0 /// ENST00000307546 // ENSEMBL…
TC0100009475.hg.1	TC0100009475.hg.1	chr1	+	113449700	113450728	10	main	Multiple_Complex	hsa_circ_0008767 // circbase // Jeck2013 ALT_ACCEPTOR, ALT_DONOR, coding, INTERNAL, intronic best transcript NM_152900 // chr1 // 100 // 100 // 0 // --- // 0 /// ENST00000424736 // ENSEMBL // havana:known chromosome:GRCh38:1:113449700:113450728:1 gene:ENSG00000232499 gene_biotype:processed_pseudogene transcript_biotype:processed_pseudogene // chr1 // 100 // 100 // 0 // --- // 0 /// NONHSAT005325 …
TC0100009479.hg.1	TC0100009479.hg.1	chr1	+	113905141	113914086	10	main	Multiple_Complex	NM_022836 // RefSeq // Homo sapiens DNA cross-link repair 1B (DCLRE1B), mRNA. // chr1 // 100 // 100 // 0 // --- // 0 /// ENST00000369563 // ENSEMBL // DNA cross-link repair 1B [gene_biotype:protein_coding transcript_biotype:protein_coding] // chr1 // 100 // 100 // 0 // --- // 0 /// ENST00000466480 // ENSEMBL // DNA cross-link repair 1B [gene_biotype:protein_coding transcript_biotype:processed_tra…
TC0100009480.hg.1	TC0100009480.hg.1	chr1	+	113929192	113977869	10	main	Multiple_Complex	NM_152696 // RefSeq // Homo sapiens homeodomain interacting protein kinase 1 (HIPK1), transcript variant 2, mRNA. // chr1 // 100 // 100 // 0 // --- // 0 /// NM_181358 // RefSeq // Homo sapiens homeodomain interacting protein kinase 1 (HIPK1), transcript variant 4, mRNA. // chr1 // 100 // 100 // 0 // --- // 0 /// NM_198268 // RefSeq // Homo sapiens homeodomain interacting protein kinase 1 (HIPK1),…
TC0100009482.hg.1	TC0100009482.hg.1	chr1	+	113962439	113962686	6	main	NonCoding	hsa_circ_0000113 // circbase // Memczak2013 ALT_DONOR, coding, INTERNAL, intronic best transcript NM_198268 // chr1 // 100 // 100 // 0 // --- // 0
TC0100009509.hg.1	TC0100009509.hg.1	chr1	+	114854803	114995370	10	main	Multiple_Complex	NM_001282541 // RefSeq // Homo sapiens synaptonemal complex protein 1 (SYCP1), transcript variant 2, mRNA. // chr1 // 100 // 100 // 0 // --- // 0 /// NM_001282542 // RefSeq // Homo sapiens synaptonemal complex protein 1 (SYCP1), transcript variant 3, mRNA. // chr1 // 100 // 100 // 0 // --- // 0 /// NM_003176 // RefSeq // Homo sapiens synaptonemal complex protein 1 (SYCP1), transcript variant 1, m…
TC0100009511.hg.1	TC0100009511.hg.1	chr1	+	115029824	115034309	10	main	Coding	NM_000549 // RefSeq // Homo sapiens thyroid stimulating hormone, beta (TSHB), transcript variant 1, mRNA. // chr1 // 100 // 100 // 0 // --- // 0 /// NM_001277991 // RefSeq // Homo sapiens thyroid stimulating hormone, beta (TSHB), transcript variant 2, mRNA. // chr1 // 100 // 100 // 0 // --- // 0 /// ENST00000256592 // ENSEMBL // thyroid stimulating hormone, beta [gene_biotype:protein_coding trans…
TC0100009524.hg.1	TC0100009524.hg.1	chr1	+	115641953	115698224	10	main	Multiple_Complex	NM_001172411 // RefSeq // Homo sapiens VANGL planar cell polarity protein 1 (VANGL1), transcript variant 3, mRNA. // chr1 // 100 // 100 // 0 // --- // 0 /// NM_001172412 // RefSeq // Homo sapiens VANGL planar cell polarity protein 1 (VANGL1), transcript variant 2, mRNA. // chr1 // 100 // 100 // 0 // --- // 0 /// NM_138959 // RefSeq // Homo sapiens VANGL planar cell polarity protein 1 (VANGL1), tr…
TC0100009534.hg.1	TC0100009534.hg.1	chr1	+	115976498	116070054	10	main	Multiple_Complex	NM_018420 // RefSeq // Homo sapiens solute carrier family 22, member 15 (SLC22A15), mRNA. // chr1 // 100 // 100 // 0 // --- // 0 /// ENST00000369502 // ENSEMBL // solute carrier family 22, member 15 [gene_biotype:protein_coding transcript_biotype:protein_coding] // chr1 // 100 // 100 // 0 // --- // 0 /// ENST00000369503 // ENSEMBL // solute carrier family 22, member 15 [gene_biotype:protein_codin…
TC0100009535.hg.1	TC0100009535.hg.1	chr1	+	116111755	116135240	10	main	Multiple_Complex	NM_152367 // RefSeq // Homo sapiens mab-21-like 3 (C. elegans) (MAB21L3), mRNA. // chr1 // 100 // 100 // 0 // --- // 0 /// ENST00000369500 // ENSEMBL // mab-21-like 3 (C. elegans) [gene_biotype:protein_coding transcript_biotype:protein_coding] // chr1 // 100 // 100 // 0 // --- // 0 /// ENST00000464946 // ENSEMBL // mab-21-like 3 (C. elegans) [gene_biotype:protein_coding transcript_biotype:process…
TC0100009553.hg.1	TC0100009553.hg.1	chr1	+	116694112	116706603	10	main	Multiple_Complex	NM_001013643 // RefSeq // Homo sapiens chromosome 1 open reading frame 137 (C1orf137), mRNA. // chr1 // 100 // 100 // 0 // --- // 0 /// OTTHUMT00000059045 // Havana transcript // chromosome 1 open reading frame 137 // chr1 // 100 // 100 // 0 // --- // 0 /// uc031una.2 // UCSC Genes // chromosome 1 open reading frame 137 [Source:HGNC Symbol;Acc:HGNC:32040] // chr1 // 100 // 100 // 0 // --- // 0 //…
TC0100009555.hg.1	TC0100009555.hg.1	chr1	+	116754385	116769229	10	main	Coding	NM_001767 // RefSeq // Homo sapiens CD2 molecule (CD2), mRNA. // chr1 // 100 // 100 // 0 // --- // 0 /// ENST00000369477 // ENSEMBL // CD2 molecule [gene_biotype:protein_coding transcript_biotype:protein_coding] // chr1 // 100 // 100 // 0 // --- // 0 /// ENST00000369478 // ENSEMBL // CD2 molecule [gene_biotype:protein_coding transcript_biotype:protein_coding] // chr1 // 100 // 100 // 0 // --- // …
TC0100009558.hg.1	TC0100009558.hg.1	chr1	+	116909923	116990358	10	main	Multiple_Complex	NM_020440 // RefSeq // Homo sapiens prostaglandin F2 receptor inhibitor (PTGFRN), mRNA. // chr1 // 100 // 100 // 0 // --- // 0 /// ENST00000393203 // ENSEMBL // prostaglandin F2 receptor inhibitor [gene_biotype:protein_coding transcript_biotype:protein_coding] // chr1 // 100 // 100 // 0 // --- // 0 /// ENST00000496699 // ENSEMBL // prostaglandin F2 receptor inhibitor [gene_biotype:protein_coding …
TC0100009560.hg.1	TC0100009560.hg.1	chr1	+	117001750	117036551	10	main	Multiple_Complex	NM_001256106 // RefSeq // Homo sapiens CD101 molecule (CD101), transcript variant 2, mRNA. // chr1 // 100 // 100 // 0 // --- // 0 /// NM_001256109 // RefSeq // Homo sapiens CD101 molecule (CD101), transcript variant 3, mRNA. // chr1 // 100 // 100 // 0 // --- // 0 /// NM_001256111 // RefSeq // Homo sapiens CD101 molecule (CD101), transcript variant 4, mRNA. // chr1 // 100 // 100 // 0 // --- // 0 /…
TC0100009561.hg.1	TC0100009561.hg.1	chr1	+	117060303	117107453	10	main	Multiple_Complex	NM_003594 // RefSeq // Homo sapiens transcription termination factor, RNA polymerase II (TTF2), mRNA. // chr1 // 100 // 100 // 0 // --- // 0 /// ENST00000369466 // ENSEMBL // transcription termination factor, RNA polymerase II [gene_biotype:protein_coding transcript_biotype:protein_coding] // chr1 // 100 // 100 // 0 // --- // 0 /// ENST00000427271 // ENSEMBL // transcription termination factor, R…
TC0100009568.hg.1	TC0100009568.hg.1	chr1	+	117367449	117528872	10	main	Multiple_Complex	NM_006699 // RefSeq // Homo sapiens mannosidase, alpha, class 1A, member 2 (MAN1A2), mRNA. // chr1 // 100 // 100 // 0 // --- // 0 /// ENST00000356554 // ENSEMBL // mannosidase, alpha, class 1A, member 2 [gene_biotype:protein_coding transcript_biotype:protein_coding] // chr1 // 100 // 100 // 0 // --- // 0 /// ENST00000421535 // ENSEMBL // mannosidase, alpha, class 1A, member 2 [gene_biotype:protei…
TC0100009572.hg.1	TC0100009572.hg.1	chr1	+	117605934	117628389	10	main	Coding	NM_017709 // RefSeq // Homo sapiens family with sequence similarity 46, member C (FAM46C), mRNA. // chr1 // 100 // 100 // 0 // --- // 0 /// ENST00000369448 // ENSEMBL // family with sequence similarity 46, member C [gene_biotype:protein_coding transcript_biotype:protein_coding] // chr1 // 100 // 100 // 0 // --- // 0 /// BC036516 // GenBank // Homo sapiens family with sequence similarity 46, membe…
TC0100009580.hg.1	TC0100009580.hg.1	chr1	+	117929720	117966542	10	main	Multiple_Complex	NM_006784 // RefSeq // Homo sapiens WD repeat domain 3 (WDR3), mRNA. // chr1 // 100 // 100 // 0 // --- // 0 /// ENST00000349139 // ENSEMBL // WD repeat domain 3 [gene_biotype:protein_coding transcript_biotype:protein_coding] // chr1 // 100 // 100 // 0 // --- // 0 /// ENST00000369441 // ENSEMBL // WD repeat domain 3 [gene_biotype:protein_coding transcript_biotype:protein_coding] // chr1 // 100 // …
TC0100009608.hg.1	TC0100009608.hg.1	chr1	+	119368776	119394130	10	main	Multiple_Complex	NM_001005783 // RefSeq // Homo sapiens hydroxyacid oxidase 2 (long chain) (HAO2), transcript variant 2, mRNA. // chr1 // 100 // 100 // 0 // --- // 0 /// NM_016527 // RefSeq // Homo sapiens hydroxyacid oxidase 2 (long chain) (HAO2), transcript variant 1, mRNA. // chr1 // 100 // 100 // 0 // --- // 0 /// ENST00000325945 // ENSEMBL // hydroxyacid oxidase 2 (long chain) [gene_biotype:protein_coding tr…
TC0100009611.hg.1	TC0100009611.hg.1	chr1	+	119414647	119423039	10	main	Multiple_Complex	NM_000198 // RefSeq // Homo sapiens hydroxy-delta-5-steroid dehydrogenase, 3 beta- and steroid delta-isomerase 2 (HSD3B2), transcript variant 1, mRNA. // chr1 // 100 // 100 // 0 // --- // 0 /// NM_001166120 // RefSeq // Homo sapiens hydroxy-delta-5-steroid dehydrogenase, 3 beta- and steroid delta-isomerase 2 (HSD3B2), transcript variant 2, mRNA. // chr1 // 100 // 100 // 0 // --- // 0 /// ENST0000…
TC0100009614.hg.1	TC0100009614.hg.1	chr1	+	119507198	119515058	10	main	Multiple_Complex	NM_000862 // RefSeq // Homo sapiens hydroxy-delta-5-steroid dehydrogenase, 3 beta- and steroid delta-isomerase 1 (HSD3B1), mRNA. // chr1 // 100 // 100 // 0 // --- // 0 /// ENST00000369413 // ENSEMBL // hydroxy-delta-5-steroid dehydrogenase, 3 beta- and steroid delta-isomerase 1 [gene_biotype:protein_coding transcript_biotype:protein_coding] // chr1 // 100 // 100 // 0 // --- // 0 /// ENST000004875…
TC0100009621.hg.1	TC0100009621.hg.1	chr1	+	119659798	119744226	10	main	Multiple_Complex	NM_006623 // RefSeq // Homo sapiens phosphoglycerate dehydrogenase (PHGDH), mRNA. // chr1 // 100 // 100 // 0 // --- // 0 /// ENST00000369407 // ENSEMBL // phosphoglycerate dehydrogenase [gene_biotype:protein_coding transcript_biotype:protein_coding] // chr1 // 100 // 100 // 0 // --- // 0 /// ENST00000369409 // ENSEMBL // phosphoglycerate dehydrogenase [gene_biotype:protein_coding transcript_bioty…
TC0100009641.hg.1	TC0100009641.hg.1	chr1	+	120436351	120467844	10	main	Multiple_Complex	NM_001037501 // RefSeq // Homo sapiens neuroblastoma breakpoint family, member 8 (NBPF8), transcript variant 1, mRNA. // chr1 // 100 // 100 // 0 // --- // 0 /// NR_102404 // RefSeq // Homo sapiens neuroblastoma breakpoint family, member 8 (NBPF8), transcript variant 2, non-coding RNA. // chr1 // 100 // 100 // 0 // --- // 0 /// NR_102405 // RefSeq // Homo sapiens neuroblastoma breakpoint family, m…
TC0100009646.hg.1	TC0100009646.hg.1	chr1	+	120805418	120841481	10	main	Coding	ENST00000609741 // ENSEMBL // neuroblastoma breakpoint family, member 26 [gene_biotype:protein_coding transcript_biotype:protein_coding] // chr1 // 100 // 100 // 0 // --- // 0 /// ENST00000611287 // ENSEMBL // neuroblastoma breakpoint family, member 26 [gene_biotype:protein_coding transcript_biotype:protein_coding] // chr1 // 100 // 100 // 0 // --- // 0 /// ENST00000611702 // ENSEMBL // neuroblas…
TC0100009651.hg.1	TC0100009651.hg.1	chr1	+	120889746	120890530	10	main	Coding	NM_001143883 // RefSeq // Homo sapiens peptidylprolyl isomerase A (cyclophilin A)-like 4A (PPIAL4A), mRNA. // chr1 // 100 // 100 // 0 // --- // 0 /// ENST00000577856 // ENSEMBL // peptidylprolyl isomerase A (cyclophilin A)-like 4A [gene_biotype:protein_coding transcript_biotype:protein_coding] // chr1 // 100 // 100 // 0 // --- // 0 /// BC172332 // GenBank // Synthetic construct Homo sapiens clone…
TC0100009656.hg.1	TC0100009656.hg.1	chr1	+	121087345	121097161	10	main	Multiple_Complex	NM_001004340 // RefSeq // Homo sapiens Fc fragment of IgG, high affinity Ib, receptor (CD64) (FCGR1B), transcript variant 2, mRNA. // chr1 // 100 // 100 // 0 // --- // 0 /// NM_001017986 // RefSeq // Homo sapiens Fc fragment of IgG, high affinity Ib, receptor (CD64) (FCGR1B), transcript variant 1, mRNA. // chr1 // 100 // 100 // 0 // --- // 0 /// NM_001244910 // RefSeq // Homo sapiens Fc fragment …
TC0100009658.hg.1	TC0100009658.hg.1	chr1	+	121184810	121392822	10	main	Multiple_Complex	NM_001271872 // RefSeq // Homo sapiens SLIT-ROBO Rho GTPase activating protein 2C (SRGAP2C), mRNA. // chr1 // 100 // 100 // 0 // --- // 0 /// ENST00000304465 // ENSEMBL // SLIT-ROBO Rho GTPase activating protein 2C [gene_biotype:protein_coding transcript_biotype:protein_coding] // chr1 // 100 // 100 // 0 // --- // 0 /// ENST00000367123 // ENSEMBL // SLIT-ROBO Rho GTPase activating protein 2C [gen…
TC0100009696.hg.1	TC0100009696.hg.1	chr1	+	143784836	143797108	10	main	NonCoding	NR_111933_2 // RefSeq // Homo sapiens uncharacterized LOC388692 (LOC388692), long non-coding RNA. // chr1 // 100 // 100 // 0 // --- // 0 /// NR_111934_2 // RefSeq // Homo sapiens family with sequence similarity 231, member D (FAM231D), long non-coding RNA. // chr1 // 100 // 100 // 0 // --- // 0 /// ENST00000424684.1 // lncRNAWiki // N/A // chr1 // 100 // 100 // 0 // --- // 0 /// ENST00000433084.1…
TC0100009715.hg.1	TC0100009715.hg.1	chr1	+	144592868	144593652	10	main	Coding	ENST00000581138 // ENSEMBL // peptidylprolyl isomerase A (cyclophilin A)-like 4F [gene_biotype:protein_coding transcript_biotype:protein_coding] // chr1 // 100 // 100 // 0 // --- // 0 /// OTTHUMT00000479161 // Havana transcript // peptidylprolyl isomerase A (cyclophilin A)-like 4F[gene_biotype:protein_coding transcript_biotype:protein_coding] // chr1 // 100 // 100 // 0 // --- // 0 /// NM_00114403…
TC0100009723.hg.1	TC0100009723.hg.1	chr1	+	145096000	145112696	10	main	Coding	NM_207418 // RefSeq // Homo sapiens family with sequence similarity 72, member D (FAM72D), mRNA. // chr1 // 100 // 100 // 0 // --- // 0 /// ENST00000400889 // ENSEMBL // family with sequence similarity 72, member D [gene_biotype:protein_coding transcript_biotype:protein_coding] // chr1 // 100 // 100 // 0 // --- // 0 /// OTTHUMT00000158589 // Havana transcript // family with sequence similarity 72…
TC0100009738.hg.1	TC0100009738.hg.1	chr1	+	145607960	145670648	10	main	Multiple_Complex	NM_001097612 // RefSeq // Homo sapiens G protein-coupled receptor 89A (GPR89A), transcript variant 1, mRNA. // chr1 // 100 // 100 // 0 // --- // 0 /// NM_001097613 // RefSeq // Homo sapiens G protein-coupled receptor 89A (GPR89A), transcript variant 2, mRNA. // chr1 // 100 // 100 // 0 // --- // 0 /// NR_036541 // RefSeq // Homo sapiens G protein-coupled receptor 89A (GPR89A), transcript variant 3…
TC0100009742.hg.1	TC0100009742.hg.1	chr1	+	145719446	145739288	10	main	Multiple_Complex	NM_007053 // RefSeq // Homo sapiens CD160 molecule (CD160), transcript variant 1, mRNA. // chr1 // 100 // 100 // 0 // --- // 0 /// NR_103845 // RefSeq // Homo sapiens CD160 molecule (CD160), transcript variant 2, non-coding RNA. // chr1 // 100 // 100 // 0 // --- // 0 /// ENST00000235933 // ENSEMBL // CD160 molecule [gene_biotype:protein_coding transcript_biotype:protein_coding] // chr1 // 100 // …
TC0100009745.hg.1	TC0100009745.hg.1	chr1	+	145824069	145844401	10	main	Multiple_Complex	NM_001303456 // RefSeq // Homo sapiens polymerase (RNA) III (DNA directed) polypeptide C (62kD) (POLR3C), transcript variant 2, mRNA. // chr1 // 100 // 100 // 0 // --- // 0 /// NM_006468 // RefSeq // Homo sapiens polymerase (RNA) III (DNA directed) polypeptide C (62kD) (POLR3C), transcript variant 1, mRNA. // chr1 // 100 // 100 // 0 // --- // 0 /// ENST00000334163 // ENSEMBL // polymerase (RNA) I…
TC0100009746.hg.1	TC0100009746.hg.1	chr1	+	145844607	145848953	10	main	Multiple_Complex	NM_001012758 // RefSeq // Homo sapiens nudix (nucleoside diphosphate linked moiety X)-type motif 17 (NUDT17), mRNA. // chr1 // 100 // 100 // 0 // --- // 0 /// ENST00000334513 // ENSEMBL // nudix (nucleoside diphosphate linked moiety X)-type motif 17 [gene_biotype:protein_coding transcript_biotype:protein_coding] // chr1 // 100 // 100 // 0 // --- // 0 /// ENST00000444015 // ENSEMBL // nudix (nucle…
TC0100009760.hg.1	TC0100009760.hg.1	chr1	+	146297773	146301614	10	main	Multiple_Complex	NR_002212 // RefSeq // Homo sapiens nudix (nucleoside diphosphate linked moiety X)-type motif 4 pseudogene 1 (NUDT4P1), non-coding RNA. // chr1 // 100 // 100 // 0 // --- // 0 /// NR_104005 // RefSeq // Homo sapiens nudix (nucleoside diphosphate linked moiety X)-type motif 4 pseudogene 2 (NUDT4P2), non-coding RNA. // chr1 // 100 // 100 // 0 // --- // 0 /// BC051310 // GenBank // Homo sapiens nudix…
TC0100009770.hg.1	TC0100009770.hg.1	chr1	+	146938545	146996202	10	main	Multiple_Complex	NM_001278141 // RefSeq // Homo sapiens neuroblastoma breakpoint family, member 12 (NBPF12), mRNA. // chr1 // 100 // 100 // 0 // --- // 0 /// ENST00000439206 // ENSEMBL // neuroblastoma breakpoint family, member 12 [gene_biotype:protein_coding transcript_biotype:protein_coding] // chr1 // 100 // 100 // 0 // --- // 0 /// ENST00000579935 // ENSEMBL // neuroblastoma breakpoint family, member 12 [gene…
TC0100009788.hg.1	TC0100009788.hg.1	chr1	+	147541412	147626219	10	main	Multiple_Complex	NM_004326 // RefSeq // Homo sapiens B-cell CLL/lymphoma 9 (BCL9), mRNA. // chr1 // 100 // 100 // 0 // --- // 0 /// ENST00000234739 // ENSEMBL // B-cell CLL/lymphoma 9 [gene_biotype:protein_coding transcript_biotype:protein_coding] // chr1 // 100 // 100 // 0 // --- // 0 /// ENST00000473292 // ENSEMBL // B-cell CLL/lymphoma 9 [gene_biotype:protein_coding transcript_biotype:processed_transcript] // …
TC0100009799.hg.1	TC0100009799.hg.1	chr1	+	147902820	147909268	10	main	Coding	NM_005267 // RefSeq // Homo sapiens gap junction protein, alpha 8, 50kDa (GJA8), mRNA. // chr1 // 100 // 100 // 0 // --- // 0 /// ENST00000369235 // ENSEMBL // gap junction protein, alpha 8, 50kDa [gene_biotype:protein_coding transcript_biotype:protein_coding] // chr1 // 100 // 100 // 0 // --- // 0 /// OTTHUMT00000060647 // Havana transcript // gap junction protein, alpha 8, 50kDa[gene_biotype:pr…
TC0100009800.hg.1	TC0100009800.hg.1	chr1	+	147928393	147993521	10	main	Multiple_Complex	NM_016334 // RefSeq // Homo sapiens G protein-coupled receptor 89B (GPR89B), mRNA. // chr1 // 100 // 100 // 0 // --- // 0 /// OTTHUMT00000037481 // Havana transcript // G protein-coupled receptor 89B[gene_biotype:protein_coding transcript_biotype:protein_coding] // chr1 // 100 // 100 // 0 // --- // 0 /// OTTHUMT00000037482 // Havana transcript // G protein-coupled receptor 89B[gene_biotype:protei…
TC0100009833.hg.1	TC0100009833.hg.1	chr1	+	148748556	148752397	10	main	Multiple_Complex	BC012069 // GenBank // Homo sapiens nudix (nucleoside diphosphate linked moiety X)-type motif 4, mRNA (cDNA clone MGC:19931 IMAGE:4650281), complete cds. // chr1 // 100 // 100 // 0 // --- // 0 /// OTTHUMT00000477870 // Havana transcript // nudix (nucleoside diphosphate linked moiety X)-type motif 4 pseudogene 1[gene_biotype:processed_pseudogene transcript_biotype:processed_pseudogene] // chr1 // …
TC0100009837.hg.1	TC0100009837.hg.1	chr1	+	148808181	149048286	10	main	Multiple_Complex	NM_001002810 // RefSeq // Homo sapiens phosphodiesterase 4D interacting protein (PDE4DIP), transcript variant 4, mRNA. // chr1 // 100 // 100 // 0 // --- // 0 /// NM_001002811 // RefSeq // Homo sapiens phosphodiesterase 4D interacting protein (PDE4DIP), transcript variant 5, mRNA. // chr1 // 100 // 100 // 0 // --- // 0 /// NM_001002812 // RefSeq // Homo sapiens phosphodiesterase 4D interacting pro…
TC0100009846.hg.1	TC0100009846.hg.1	chr1	+	149016666	149017300	6	main	Unassigned	PDE4DIP.wgAug10-unspliced // Ace View // Transcript Identified by AceView, Entrez Gene ID(s) 9659 // chr1 // 100 // 100 // 0 // --- // 0
TC0100009858.hg.1	TC0100009858.hg.1	chr1	+	149583823	149584607	10	main	Coding	NM_001135789 // RefSeq // Homo sapiens peptidylprolyl isomerase A (cyclophilin A)-like 4C (PPIAL4C), mRNA. // chr1 // 100 // 100 // 0 // --- // 0 /// ENST00000585245 // ENSEMBL // peptidylprolyl isomerase A (cyclophilin A)-like 4C [gene_biotype:protein_coding transcript_biotype:protein_coding] // chr1 // 100 // 100 // 0 // --- // 0 /// BC130376 // GenBank // Homo sapiens peptidylprolyl isomerase …
TC0100009866.hg.1	TC0100009866.hg.1	chr1	+	149782671	149792518	10	main	Multiple_Complex	NM_000566 // RefSeq // Homo sapiens Fc fragment of IgG, high affinity Ia, receptor (CD64) (FCGR1A), mRNA. // chr1 // 100 // 100 // 0 // --- // 0 /// ENST00000369168 // ENSEMBL // Fc fragment of IgG, high affinity Ia, receptor (CD64) [gene_biotype:protein_coding transcript_biotype:protein_coding] // chr1 // 100 // 100 // 0 // --- // 0 /// ENST00000444948 // ENSEMBL // Fc fragment of IgG, high affi…
TC0100009870.hg.1	TC0100009870.hg.1	chr1	+	149832657	149839767	10	main	Coding	NM_001034077 // RefSeq // Homo sapiens histone cluster 2, H4b (HIST2H4B), mRNA. // chr1 // 100 // 100 // 0 // --- // 0 /// ENST00000578186 // ENSEMBL // histone cluster 2, H4a [gene_biotype:protein_coding transcript_biotype:protein_coding] // chr1 // 100 // 100 // 0 // --- // 0 /// ENST00000613412 // ENSEMBL // histone cluster 2, H4a [gene_biotype:protein_coding transcript_biotype:nonsense_mediat…
TC0100009876.hg.1	TC0100009876.hg.1	chr1	+	149851061	149851624	10	main	Coding	NM_003516 // RefSeq // Homo sapiens histone cluster 2, H2aa3 (HIST2H2AA3), mRNA. // chr1 // 100 // 100 // 0 // --- // 0 /// ENST00000607355 // ENSEMBL // histone cluster 2, H2aa4 [gene_biotype:protein_coding transcript_biotype:protein_coding] // chr1 // 100 // 100 // 0 // --- // 0 /// OTTHUMT00000033457 // Havana transcript // histone cluster 2, H2aa4[gene_biotype:protein_coding transcript_biotyp…
TC0100009877.hg.1	TC0100009877.hg.1	chr1	+	149852619	149854274	10	main	Coding	ENST00000403683 // ENSEMBL // histone cluster 2, H3a [gene_biotype:protein_coding transcript_biotype:protein_coding] // chr1 // 100 // 100 // 0 // --- // 0 /// OTTHUMT00000033454 // Havana transcript // histone cluster 2, H3a[gene_biotype:protein_coding transcript_biotype:protein_coding] // chr1 // 100 // 100 // 0 // --- // 0 /// NM_001005464_2 // RefSeq // Homo sapiens histone cluster 2, H3a (HI…
TC0100009880.hg.1	TC0100009880.hg.1	chr1	+	149886940	149887411	10	main	Coding	NM_003517 // RefSeq // Homo sapiens histone cluster 2, H2ac (HIST2H2AC), mRNA. // chr1 // 100 // 100 // 0 // --- // 0 /// ENST00000331380 // ENSEMBL // histone cluster 2, H2ac [gene_biotype:protein_coding transcript_biotype:protein_coding] // chr1 // 100 // 100 // 0 // --- // 0 /// BC060324 // GenBank // Homo sapiens histone cluster 2, H2ac, mRNA (cDNA clone MGC:74460 IMAGE:3892650), complete cds…
TC0100009881.hg.1	TC0100009881.hg.1	chr1	+	149887890	149900798	10	main	Multiple_Complex	NM_016074 // RefSeq // Homo sapiens bolA family member 1 (BOLA1), mRNA. // chr1 // 100 // 100 // 0 // --- // 0 /// ENST00000369150 // ENSEMBL // bolA family member 1 [gene_biotype:protein_coding transcript_biotype:protein_coding] // chr1 // 100 // 100 // 0 // --- // 0 /// ENST00000369152 // ENSEMBL // bolA family member 1 [gene_biotype:protein_coding transcript_biotype:protein_coding] // chr1 // …
TC0100009889.hg.1	TC0100009889.hg.1	chr1	+	150067293	150145327	10	main	Multiple_Complex	NM_001279353 // RefSeq // Homo sapiens vacuolar protein sorting 45 homolog (S. cerevisiae) (VPS45), transcript variant 2, mRNA. // chr1 // 100 // 100 // 0 // --- // 0 /// NM_001279354 // RefSeq // Homo sapiens vacuolar protein sorting 45 homolog (S. cerevisiae) (VPS45), transcript variant 3, mRNA. // chr1 // 100 // 100 // 0 // --- // 0 /// NM_001279355 // RefSeq // Homo sapiens vacuolar protein s…
TC0100009897.hg.1	TC0100009897.hg.1	chr1	+	150257159	150265078	10	main	Multiple_Complex	NM_012113 // RefSeq // Homo sapiens carbonic anhydrase XIV (CA14), mRNA. // chr1 // 100 // 100 // 0 // --- // 0 /// ENST00000369111 // ENSEMBL // carbonic anhydrase XIV [gene_biotype:protein_coding transcript_biotype:protein_coding] // chr1 // 100 // 100 // 0 // --- // 0 /// ENST00000483993 // ENSEMBL // carbonic anhydrase XIV [gene_biotype:protein_coding transcript_biotype:nonsense_mediated_deca…
TC0100009899.hg.1	TC0100009899.hg.1	chr1	+	150268200	150280924	10	main	Multiple_Complex	NM_001301039 // RefSeq // Homo sapiens chromosome 1 open reading frame 54 (C1orf54), transcript variant 1, mRNA. // chr1 // 100 // 100 // 0 // --- // 0 /// NM_001301040 // RefSeq // Homo sapiens chromosome 1 open reading frame 54 (C1orf54), transcript variant 2, mRNA. // chr1 // 100 // 100 // 0 // --- // 0 /// NM_001301041 // RefSeq // Homo sapiens chromosome 1 open reading frame 54 (C1orf54), tr…
TC0100009900.hg.1	TC0100009900.hg.1	chr1	+	150282533	150287093	10	main	Multiple_Complex	NM_001300838 // RefSeq // Homo sapiens circadian associated repressor of transcription (CIART), transcript variant 2, mRNA. // chr1 // 100 // 100 // 0 // --- // 0 /// NM_001300839 // RefSeq // Homo sapiens circadian associated repressor of transcription (CIART), transcript variant 3, mRNA. // chr1 // 100 // 100 // 0 // --- // 0 /// NM_001300840 // RefSeq // Homo sapiens circadian associated repre…
TC0100009901.hg.1	TC0100009901.hg.1	chr1	+	150293720	150308979	10	main	Multiple_Complex	NM_018997 // RefSeq // Homo sapiens mitochondrial ribosomal protein S21 (MRPS21), transcript variant 2, mRNA. // chr1 // 100 // 100 // 0 // --- // 0 /// NM_031901 // RefSeq // Homo sapiens mitochondrial ribosomal protein S21 (MRPS21), transcript variant 1, mRNA. // chr1 // 100 // 100 // 0 // --- // 0 /// ENST00000581066 // ENSEMBL // mitochondrial ribosomal protein S21 [gene_biotype:protein_codin…
TC0100009902.hg.1	TC0100009902.hg.1	chr1	+	150321476	150353228	10	main	Multiple_Complex	NM_004698 // RefSeq // Homo sapiens pre-mRNA processing factor 3 (PRPF3), mRNA. // chr1 // 100 // 100 // 0 // --- // 0 /// ENST00000324862 // ENSEMBL // pre-mRNA processing factor 3 [gene_biotype:protein_coding transcript_biotype:protein_coding] // chr1 // 100 // 100 // 0 // --- // 0 /// ENST00000467329 // ENSEMBL // pre-mRNA processing factor 3 [gene_biotype:protein_coding transcript_biotype:pro…
TC0100009903.hg.1	TC0100009903.hg.1	chr1	+	150363091	150476566	10	main	Multiple_Complex	NM_001297673 // RefSeq // Homo sapiens regulation of nuclear pre-mRNA domain containing 2 (RPRD2), transcript variant 2, mRNA. // chr1 // 100 // 100 // 0 // --- // 0 /// NM_001297674 // RefSeq // Homo sapiens regulation of nuclear pre-mRNA domain containing 2 (RPRD2), transcript variant 3, mRNA. // chr1 // 100 // 100 // 0 // --- // 0 /// NM_015203 // RefSeq // Homo sapiens regulation of nuclear p…
TC0100009907.hg.1	TC0100009907.hg.1	chr1	+	150487364	150507609	10	main	Multiple_Complex	NM_001271895 // RefSeq // Homo sapiens threonyl-tRNA synthetase 2, mitochondrial (putative) (TARS2), transcript variant 2, mRNA. // chr1 // 100 // 100 // 0 // --- // 0 /// NM_001271896 // RefSeq // Homo sapiens threonyl-tRNA synthetase 2, mitochondrial (putative) (TARS2), transcript variant 3, mRNA. // chr1 // 100 // 100 // 0 // --- // 0 /// NM_025150 // RefSeq // Homo sapiens threonyl-tRNA synth…
TC0100009908.hg.1	TC0100009908.hg.1	chr1	+	150508011	150513789	10	main	Multiple_Complex	NM_001202858 // RefSeq // Homo sapiens extracellular matrix protein 1 (ECM1), transcript variant 3, mRNA. // chr1 // 100 // 100 // 0 // --- // 0 /// NM_004425 // RefSeq // Homo sapiens extracellular matrix protein 1 (ECM1), transcript variant 1, mRNA. // chr1 // 100 // 100 // 0 // --- // 0 /// NM_022664 // RefSeq // Homo sapiens extracellular matrix protein 1 (ECM1), transcript variant 2, mRNA. /…
TC0100009913.hg.1	TC0100009913.hg.1	chr1	+	150549369	150560937	10	main	Multiple_Complex	NM_001288607 // RefSeq // Homo sapiens ADAMTS-like 4 (ADAMTSL4), transcript variant 3, mRNA. // chr1 // 100 // 100 // 0 // --- // 0 /// NM_001288608 // RefSeq // Homo sapiens ADAMTS-like 4 (ADAMTSL4), transcript variant 4, mRNA. // chr1 // 100 // 100 // 0 // --- // 0 /// NM_019032 // RefSeq // Homo sapiens ADAMTS-like 4 (ADAMTSL4), transcript variant 1, mRNA. // chr1 // 100 // 100 // 0 // --- // …
TC0100009929.hg.1	TC0100009929.hg.1	chr1	+	150926263	150964744	10	main	Multiple_Complex	NM_001145415 // RefSeq // Homo sapiens SET domain, bifurcated 1 (SETDB1), transcript variant 1, mRNA. // chr1 // 100 // 100 // 0 // --- // 0 /// NM_001243491 // RefSeq // Homo sapiens SET domain, bifurcated 1 (SETDB1), transcript variant 3, mRNA. // chr1 // 100 // 100 // 0 // --- // 0 /// NM_012432 // RefSeq // Homo sapiens SET domain, bifurcated 1 (SETDB1), transcript variant 2, mRNA. // chr1 //…
TC0100009934.hg.1	TC0100009934.hg.1	chr1	+	150982017	150995638	10	main	Multiple_Complex	NM_003568 // RefSeq // Homo sapiens annexin A9 (ANXA9), mRNA. // chr1 // 100 // 100 // 0 // --- // 0 /// ENST00000368947 // ENSEMBL // annexin A9 [gene_biotype:protein_coding transcript_biotype:protein_coding] // chr1 // 100 // 100 // 0 // --- // 0 /// ENST00000474997 // ENSEMBL // annexin A9 [gene_biotype:protein_coding transcript_biotype:processed_transcript] // chr1 // 100 // 100 // 0 // --- /…
TC0100009935.hg.1	TC0100009935.hg.1	chr1	+	151008391	151035713	10	main	Multiple_Complex	NM_001303229 // RefSeq // Homo sapiens prune exopolyphosphatase (PRUNE), transcript variant 2, mRNA. // chr1 // 100 // 100 // 0 // --- // 0 /// NM_001303242 // RefSeq // Homo sapiens prune exopolyphosphatase (PRUNE), transcript variant 3, mRNA. // chr1 // 100 // 100 // 0 // --- // 0 /// NM_001303243 // RefSeq // Homo sapiens prune exopolyphosphatase (PRUNE), transcript variant 4, mRNA. // chr1 //…
TC0100009936.hg.1	TC0100009936.hg.1	chr1	+	151036553	151047600	10	main	Multiple_Complex	NM_001159642 // RefSeq // Homo sapiens BCL2/adenovirus E1B 19kD interacting protein like (BNIPL), transcript variant 2, mRNA. // chr1 // 100 // 100 // 0 // --- // 0 /// NM_138278 // RefSeq // Homo sapiens BCL2/adenovirus E1B 19kD interacting protein like (BNIPL), transcript variant 1, mRNA. // chr1 // 100 // 100 // 0 // --- // 0 /// ENST00000295294 // ENSEMBL // BCL2/adenovirus E1B 19kD interacti…
TC0100009937.hg.1	TC0100009937.hg.1	chr1	+	151047740	151051986	10	main	Multiple_Complex	NM_017860 // RefSeq // Homo sapiens chromosome 1 open reading frame 56 (C1orf56), mRNA. // chr1 // 100 // 100 // 0 // --- // 0 /// ENST00000368926 // ENSEMBL // chromosome 1 open reading frame 56 [gene_biotype:protein_coding transcript_biotype:protein_coding] // chr1 // 100 // 100 // 0 // --- // 0 /// ENST00000465135 // ENSEMBL // chromosome 1 open reading frame 56 [gene_biotype:protein_coding tr…
TC0100009938.hg.1	TC0100009938.hg.1	chr1	+	151057758	151068497	10	main	Multiple_Complex	NM_006818 // RefSeq // Homo sapiens myeloid/lymphoid or mixed-lineage leukemia; translocated to, 11 (MLLT11), mRNA. // chr1 // 100 // 100 // 0 // --- // 0 /// ENST00000368921 // ENSEMBL // myeloid/lymphoid or mixed-lineage leukemia; translocated to, 11 [gene_biotype:protein_coding transcript_biotype:protein_coding] // chr1 // 100 // 100 // 0 // --- // 0 /// BC006471 // GenBank // Homo sapiens mye…
TC0100009939.hg.1	TC0100009939.hg.1	chr1	+	151070578	151125542	10	main	Multiple_Complex	NM_144618 // RefSeq // Homo sapiens GA binding protein transcription factor, beta subunit 2 (GABPB2), mRNA. // chr1 // 100 // 100 // 0 // --- // 0 /// ENST00000368916 // ENSEMBL // GA binding protein transcription factor, beta subunit 2 [gene_biotype:protein_coding transcript_biotype:protein_coding] // chr1 // 100 // 100 // 0 // --- // 0 /// ENST00000368918 // ENSEMBL // GA binding protein transc…
TC0100009943.hg.1	TC0100009943.hg.1	chr1	+	151156629	151170297	10	main	Multiple_Complex	NM_001204856 // RefSeq // Homo sapiens sodium channel modifier 1 (SCNM1), transcript variant 2, mRNA. // chr1 // 100 // 100 // 0 // --- // 0 /// NM_024041 // RefSeq // Homo sapiens sodium channel modifier 1 (SCNM1), transcript variant 1, mRNA. // chr1 // 100 // 100 // 0 // --- // 0 /// NM_024575 // RefSeq // Homo sapiens tumor necrosis factor, alpha-induced protein 8-like 2 (TNFAIP8L2), mRNA. // …
TC0100009944.hg.1	TC0100009944.hg.1	chr1	+	151197949	151249536	10	main	Multiple_Complex	NM_001135636 // RefSeq // Homo sapiens phosphatidylinositol-4-phosphate 5-kinase, type I, alpha (PIP5K1A), transcript variant 3, mRNA. // chr1 // 100 // 100 // 0 // --- // 0 /// NM_001135637 // RefSeq // Homo sapiens phosphatidylinositol-4-phosphate 5-kinase, type I, alpha (PIP5K1A), transcript variant 4, mRNA. // chr1 // 100 // 100 // 0 // --- // 0 /// NM_001135638 // RefSeq // Homo sapiens phos…
TC0100009949.hg.1	TC0100009949.hg.1	chr1	+	151254703	151267479	10	main	Multiple_Complex	NM_002810 // RefSeq // Homo sapiens proteasome 26S subunit, non-ATPase 4 (PSMD4), mRNA. // chr1 // 100 // 100 // 0 // --- // 0 /// ENST00000368881 // ENSEMBL // proteasome (prosome, macropain) 26S subunit, non-ATPase, 4 [gene_biotype:protein_coding transcript_biotype:protein_coding] // chr1 // 100 // 100 // 0 // --- // 0 /// ENST00000368884 // ENSEMBL // proteasome (prosome, macropain) 26S subuni…
TC0100009950.hg.1	TC0100009950.hg.1	chr1	+	151281555	151292180	10	main	Multiple_Complex	NM_001304763 // RefSeq // Homo sapiens zinc finger protein 687 (ZNF687), transcript variant 1, mRNA. // chr1 // 100 // 100 // 0 // --- // 0 /// NM_001304764 // RefSeq // Homo sapiens zinc finger protein 687 (ZNF687), transcript variant 3, mRNA. // chr1 // 100 // 100 // 0 // --- // 0 /// NM_020832 // RefSeq // Homo sapiens zinc finger protein 687 (ZNF687), transcript variant 2, mRNA. // chr1 // 10…
TC0100009955.hg.1	TC0100009955.hg.1	chr1	+	151399534	151401944	10	main	Multiple_Complex	NM_002796 // RefSeq // Homo sapiens proteasome subunit beta 4 (PSMB4), mRNA. // chr1 // 100 // 100 // 0 // --- // 0 /// ENST00000290541 // ENSEMBL // proteasome (prosome, macropain) subunit, beta type, 4 [gene_biotype:protein_coding transcript_biotype:protein_coding] // chr1 // 100 // 100 // 0 // --- // 0 /// ENST00000466425 // ENSEMBL // proteasome (prosome, macropain) subunit, beta type, 4 [gen…
TC0100009958.hg.1	TC0100009958.hg.1	chr1	+	151510510	151538692	10	main	Multiple_Complex	NM_020770 // RefSeq // Homo sapiens cingulin (CGN), mRNA. // chr1 // 100 // 100 // 0 // --- // 0 /// ENST00000271636 // ENSEMBL // cingulin [gene_biotype:protein_coding transcript_biotype:protein_coding] // chr1 // 100 // 100 // 0 // --- // 0 /// ENST00000416743 // ENSEMBL // cingulin [gene_biotype:protein_coding transcript_biotype:protein_coding] // chr1 // 100 // 100 // 0 // --- // 0 /// ENST00…
TC0100009959.hg.1	TC0100009959.hg.1	chr1	+	151540305	151583583	10	main	Multiple_Complex	NM_001126337 // RefSeq // Homo sapiens tuftelin 1 (TUFT1), transcript variant 2, mRNA. // chr1 // 100 // 100 // 0 // --- // 0 /// NM_001301317 // RefSeq // Homo sapiens tuftelin 1 (TUFT1), transcript variant 3, mRNA. // chr1 // 100 // 100 // 0 // --- // 0 /// NM_020127 // RefSeq // Homo sapiens tuftelin 1 (TUFT1), transcript variant 1, mRNA. // chr1 // 100 // 100 // 0 // --- // 0 /// ENST00000353…
TC0100009965.hg.1	TC0100009965.hg.1	chr1	+	151612038	151699091	10	main	Multiple_Complex	NM_030918 // RefSeq // Homo sapiens sorting nexin family member 27 (SNX27), mRNA. // chr1 // 100 // 100 // 0 // --- // 0 /// ENST00000368838 // ENSEMBL // sorting nexin family member 27 [gene_biotype:protein_coding transcript_biotype:protein_coding] // chr1 // 100 // 100 // 0 // --- // 0 /// ENST00000368841 // ENSEMBL // sorting nexin family member 27 [gene_biotype:protein_coding transcript_bioty…
TC0100009969.hg.1	TC0100009969.hg.1	chr1	+	151710433	151729805	10	main	Multiple_Complex	NM_001144956 // RefSeq // Homo sapiens regulatory subunit of type II PKA R-subunit (RIIa) domain containing 1 (RIIAD1), mRNA. // chr1 // 100 // 100 // 0 // --- // 0 /// ENST00000326413 // ENSEMBL // regulatory subunit of type II PKA R-subunit (RIIa) domain containing 1 [gene_biotype:protein_coding transcript_biotype:protein_coding] // chr1 // 100 // 100 // 0 // --- // 0 /// ENST00000426175 // ENS…
TC0100009974.hg.1	TC0100009974.hg.1	chr1	+	151762969	151771332	10	main	Multiple_Complex	NM_001134939 // RefSeq // Homo sapiens ornithine decarboxylase antizyme 3 (OAZ3), transcript variant 2, mRNA. // chr1 // 100 // 100 // 0 // --- // 0 /// NM_001301371 // RefSeq // Homo sapiens ornithine decarboxylase antizyme 3 (OAZ3), transcript variant 3, mRNA. // chr1 // 100 // 100 // 0 // --- // 0 /// NM_016178 // RefSeq // Homo sapiens ornithine decarboxylase antizyme 3 (OAZ3), transcript var…
TC0100009994.hg.1	TC0100009994.hg.1	chr1	+	152514502	152516010	10	main	Coding	NM_019060 // RefSeq // Homo sapiens cysteine-rich C-terminal 1 (CRCT1), mRNA. // chr1 // 100 // 100 // 0 // --- // 0 /// ENST00000368790 // ENSEMBL // cysteine-rich C-terminal 1 [gene_biotype:protein_coding transcript_biotype:protein_coding] // chr1 // 100 // 100 // 0 // --- // 0 /// BC119710 // GenBank // Homo sapiens cysteine-rich C-terminal 1, mRNA (cDNA clone MGC:149658 IMAGE:40117182), compl…
TC0100009996.hg.1	TC0100009996.hg.1	chr1	+	152613811	152614098	10	main	Coding	NM_178433 // RefSeq // Homo sapiens late cornified envelope 3B (LCE3B), mRNA. // chr1 // 100 // 100 // 0 // --- // 0 /// ENST00000335633 // ENSEMBL // late cornified envelope 3B [gene_biotype:protein_coding transcript_biotype:protein_coding] // chr1 // 100 // 100 // 0 // --- // 0 /// OTTHUMT00000034515 // Havana transcript // late cornified envelope 3B[gene_biotype:protein_coding transcript_bioty…
TC0100009998.hg.1	TC0100009998.hg.1	chr1	+	152663396	152664659	10	main	Coding	NM_178430 // RefSeq // Homo sapiens late cornified envelope 2D (LCE2D), mRNA. // chr1 // 100 // 100 // 0 // --- // 0 /// ENST00000368784 // ENSEMBL // late cornified envelope 2D [gene_biotype:protein_coding transcript_biotype:protein_coding] // chr1 // 100 // 100 // 0 // --- // 0 /// BC130603 // GenBank // Homo sapiens late cornified envelope 2D, mRNA (cDNA clone MGC:163475 IMAGE:40146634), compl…
TC0100009999.hg.1	TC0100009999.hg.1	chr1	+	152675295	152676574	10	main	Coding	NM_178429 // RefSeq // Homo sapiens late cornified envelope 2C (LCE2C), mRNA. // chr1 // 100 // 100 // 0 // --- // 0 /// ENST00000368783 // ENSEMBL // late cornified envelope 2C [gene_biotype:protein_coding transcript_biotype:protein_coding] // chr1 // 100 // 100 // 0 // --- // 0 /// OTTHUMT00000034509 // Havana transcript // late cornified envelope 2C[gene_biotype:protein_coding transcript_bioty…
TC0100010000.hg.1	TC0100010000.hg.1	chr1	+	152686123	152687401	10	main	Coding	NM_014357 // RefSeq // Homo sapiens late cornified envelope 2B (LCE2B), mRNA. // chr1 // 100 // 100 // 0 // --- // 0 /// ENST00000368780 // ENSEMBL // late cornified envelope 2B [gene_biotype:protein_coding transcript_biotype:protein_coding] // chr1 // 100 // 100 // 0 // --- // 0 /// OTTHUMT00000034524 // Havana transcript // late cornified envelope 2B[gene_biotype:protein_coding transcript_bioty…
TC0100010001.hg.1	TC0100010001.hg.1	chr1	+	152698364	152699442	10	main	Coding	NM_178428 // RefSeq // Homo sapiens late cornified envelope 2A (LCE2A), mRNA. // chr1 // 100 // 100 // 0 // --- // 0 /// ENST00000368779 // ENSEMBL // late cornified envelope 2A [gene_biotype:protein_coding transcript_biotype:protein_coding] // chr1 // 100 // 100 // 0 // --- // 0 /// BC119707 // GenBank // Homo sapiens late cornified envelope 2A, mRNA (cDNA clone MGC:149654 IMAGE:40117159), compl…
TC0100010002.hg.1	TC0100010002.hg.1	chr1	+	152708160	152709491	10	main	Coding	NM_178356 // RefSeq // Homo sapiens late cornified envelope 4A (LCE4A), mRNA. // chr1 // 100 // 100 // 0 // --- // 0 /// ENST00000335535 // ENSEMBL // late cornified envelope 4A [gene_biotype:protein_coding transcript_biotype:protein_coding] // chr1 // 100 // 100 // 0 // --- // 0 /// ENST00000368777 // ENSEMBL // late cornified envelope 4A [gene_biotype:protein_coding transcript_biotype:protein_c…
TC0100010003.hg.1	TC0100010003.hg.1	chr1	+	152719522	152720470	10	main	Multiple_Complex	NM_001024679 // RefSeq // Homo sapiens chromosome 1 open reading frame 68 (C1orf68), mRNA. // chr1 // 100 // 100 // 0 // --- // 0 /// ENST00000368775 // ENSEMBL // chromosome 1 open reading frame 68 [gene_biotype:protein_coding transcript_biotype:protein_coding] // chr1 // 100 // 100 // 0 // --- // 0 /// OTTHUMT00000034521 // Havana transcript // chromosome 1 open reading frame 68[gene_biotype:pr…
TC0100010006.hg.1	TC0100010006.hg.1	chr1	+	152758030	152762053	10	main	Coding	NM_001025231 // RefSeq // Homo sapiens keratinocyte proline-rich protein (KPRP), mRNA. // chr1 // 100 // 100 // 0 // --- // 0 /// ENST00000606109 // ENSEMBL // keratinocyte proline-rich protein [gene_biotype:protein_coding transcript_biotype:protein_coding] // chr1 // 100 // 100 // 0 // --- // 0 /// OTTHUMT00000034522 // Havana transcript // keratinocyte proline-rich protein[gene_biotype:protein_…
TC0100010007.hg.1	TC0100010007.hg.1	chr1	+	152776372	152776969	10	main	Coding	NM_178354 // RefSeq // Homo sapiens late cornified envelope 1F (LCE1F), mRNA. // chr1 // 100 // 100 // 0 // --- // 0 /// ENST00000334371 // ENSEMBL // late cornified envelope 1F [gene_biotype:protein_coding transcript_biotype:protein_coding] // chr1 // 100 // 100 // 0 // --- // 0 /// OTTHUMT00000034523 // Havana transcript // late cornified envelope 1F[gene_biotype:protein_coding transcript_bioty…
TC0100010008.hg.1	TC0100010008.hg.1	chr1	+	152786214	152788426	10	main	Coding	NM_178353 // RefSeq // Homo sapiens late cornified envelope 1E (LCE1E), mRNA. // chr1 // 100 // 100 // 0 // --- // 0 /// ENST00000368770 // ENSEMBL // late cornified envelope 1E [gene_biotype:protein_coding transcript_biotype:protein_coding] // chr1 // 100 // 100 // 0 // --- // 0 /// ENST00000368771 // ENSEMBL // late cornified envelope 1E [gene_biotype:protein_coding transcript_biotype:protein_c…
TC0100010009.hg.1	TC0100010009.hg.1	chr1	+	152796751	152798181	10	main	Coding	NM_178352 // RefSeq // Homo sapiens late cornified envelope 1D (LCE1D), mRNA. // chr1 // 100 // 100 // 0 // --- // 0 /// ENST00000326233 // ENSEMBL // late cornified envelope 1D [gene_biotype:protein_coding transcript_biotype:protein_coding] // chr1 // 100 // 100 // 0 // --- // 0 /// OTTHUMT00000034657 // Havana transcript // late cornified envelope 1D[gene_biotype:protein_coding transcript_bioty…
TC0100010010.hg.1	TC0100010010.hg.1	chr1	+	152827473	152828097	10	main	Coding	NM_178348 // RefSeq // Homo sapiens late cornified envelope 1A (LCE1A), mRNA. // chr1 // 100 // 100 // 0 // --- // 0 /// ENST00000335123 // ENSEMBL // late cornified envelope 1A [gene_biotype:protein_coding transcript_biotype:protein_coding] // chr1 // 100 // 100 // 0 // --- // 0 /// OTTHUMT00000034660 // Havana transcript // late cornified envelope 1A[gene_biotype:protein_coding transcript_bioty…
TC0100010011.hg.1	TC0100010011.hg.1	chr1	+	152842854	152843983	10	main	Coding	NM_001128600 // RefSeq // Homo sapiens late cornified envelope 6A (LCE6A), mRNA. // chr1 // 100 // 100 // 0 // --- // 0 /// ENST00000431011 // ENSEMBL // late cornified envelope 6A [gene_biotype:protein_coding transcript_biotype:protein_coding] // chr1 // 100 // 100 // 0 // --- // 0 /// CCDS44227.1 // ccdsGene // late cornified envelope 6A [Source:HGNC Symbol;Acc:HGNC:31824] // chr1 // 100 // 100…
TC0100010012.hg.1	TC0100010012.hg.1	chr1	+	152878317	152885047	10	main	Coding	NM_030663 // RefSeq // Homo sapiens sperm mitochondria-associated cysteine-rich protein (SMCP), mRNA. // chr1 // 100 // 100 // 0 // --- // 0 /// ENST00000368765 // ENSEMBL // sperm mitochondria-associated cysteine-rich protein [gene_biotype:protein_coding transcript_biotype:protein_coding] // chr1 // 100 // 100 // 0 // --- // 0 /// BC014593 // GenBank // Homo sapiens sperm mitochondria-associated…
TC0100010013.hg.1	TC0100010013.hg.1	chr1	+	152908545	152911886	10	main	Multiple_Complex	NM_005547 // RefSeq // Homo sapiens involucrin (IVL), mRNA. // chr1 // 100 // 100 // 0 // --- // 0 /// ENST00000368764 // ENSEMBL // involucrin [gene_biotype:protein_coding transcript_biotype:protein_coding] // chr1 // 100 // 100 // 0 // --- // 0 /// BC046391 // GenBank // Homo sapiens involucrin, mRNA (cDNA clone MGC:25201 IMAGE:4749952), complete cds. // chr1 // 100 // 100 // 0 // --- // 0 /// …
TC0100010016.hg.1	TC0100010016.hg.1	chr1	+	152970653	152972574	10	main	Coding	NM_173080 // RefSeq // Homo sapiens small proline-rich protein 4 (SPRR4), mRNA. // chr1 // 100 // 100 // 0 // --- // 0 /// ENST00000328051 // ENSEMBL // small proline-rich protein 4 [gene_biotype:protein_coding transcript_biotype:protein_coding] // chr1 // 100 // 100 // 0 // --- // 0 /// BC069445 // GenBank // Homo sapiens small proline-rich protein 4, mRNA (cDNA clone MGC:97451 IMAGE:7262727), c…
TC0100010017.hg.1	TC0100010017.hg.1	chr1	+	152984088	152985814	10	main	Multiple_Complex	NM_001199828 // RefSeq // Homo sapiens small proline-rich protein 1A (SPRR1A), transcript variant 1, mRNA. // chr1 // 100 // 100 // 0 // --- // 0 /// NM_005987 // RefSeq // Homo sapiens small proline-rich protein 1A (SPRR1A), transcript variant 2, mRNA. // chr1 // 100 // 100 // 0 // --- // 0 /// ENST00000368762 // ENSEMBL // small proline-rich protein 1A [gene_biotype:protein_coding transcript_bi…
TC0100010018.hg.1	TC0100010018.hg.1	chr1	+	153001747	153003856	10	main	Multiple_Complex	NM_001097589 // RefSeq // Homo sapiens small proline-rich protein 3 (SPRR3), transcript variant 2, mRNA. // chr1 // 100 // 100 // 0 // --- // 0 /// NM_005416 // RefSeq // Homo sapiens small proline-rich protein 3 (SPRR3), transcript variant 1, mRNA. // chr1 // 100 // 100 // 0 // --- // 0 /// ENST00000295367 // ENSEMBL // small proline-rich protein 3 [gene_biotype:protein_coding transcript_biotype…
TC0100010020.hg.1	TC0100010020.hg.1	chr1	+	153031202	153032900	10	main	Multiple_Complex	NM_003125 // RefSeq // Homo sapiens small proline-rich protein 1B (SPRR1B), mRNA. // chr1 // 100 // 100 // 0 // --- // 0 /// ENST00000307098 // ENSEMBL // small proline-rich protein 1B [gene_biotype:protein_coding transcript_biotype:protein_coding] // chr1 // 100 // 100 // 0 // --- // 0 /// OTTHUMT00000038906 // Havana transcript // small proline-rich protein 1B (cornifin)[gene_biotype:protein_co…
TC0100010024.hg.1	TC0100010024.hg.1	chr1	+	153203430	153205125	10	main	Coding	NM_001010857 // RefSeq // Homo sapiens late cornified envelope-like proline-rich 1 (LELP1), mRNA. // chr1 // 100 // 100 // 0 // --- // 0 /// ENST00000368747 // ENSEMBL // late cornified envelope-like proline-rich 1 [gene_biotype:protein_coding transcript_biotype:protein_coding] // chr1 // 100 // 100 // 0 // --- // 0 /// BC087854 // GenBank // Homo sapiens late cornified envelope-like proline-rich…
TC0100010025.hg.1	TC0100010025.hg.1	chr1	+	153217584	153219317	10	main	Coding	NM_001195571 // RefSeq // Homo sapiens proline rich 9 (PRR9), mRNA. // chr1 // 100 // 100 // 0 // --- // 0 /// ENST00000368744 // ENSEMBL // proline rich 9 [gene_biotype:protein_coding transcript_biotype:protein_coding] // chr1 // 100 // 100 // 0 // --- // 0 /// OTTHUMT00000039105 // Havana transcript // proline rich 9[gene_biotype:protein_coding transcript_biotype:protein_coding] // chr1 // 100 …
TC0100010028.hg.1	TC0100010028.hg.1	chr1	+	153259700	153262128	10	main	Coding	NM_000427 // RefSeq // Homo sapiens loricrin (LOR), mRNA. // chr1 // 100 // 100 // 0 // --- // 0 /// ENST00000368742 // ENSEMBL // loricrin [gene_biotype:protein_coding transcript_biotype:protein_coding] // chr1 // 100 // 100 // 0 // --- // 0 /// BC034690 // GenBank // Homo sapiens loricrin, mRNA (cDNA clone MGC:21357 IMAGE:4752776), complete cds. // chr1 // 100 // 100 // 0 // --- // 0 /// BC1082…
TC0100010032.hg.1	TC0100010032.hg.1	chr1	+	153357854	153361027	10	main	Multiple_Complex	NM_002965 // RefSeq // Homo sapiens S100 calcium binding protein A9 (S100A9), mRNA. // chr1 // 100 // 100 // 0 // --- // 0 /// ENST00000368738 // ENSEMBL // S100 calcium binding protein A9 [gene_biotype:protein_coding transcript_biotype:protein_coding] // chr1 // 100 // 100 // 0 // --- // 0 /// BC047681 // GenBank // Homo sapiens S100 calcium binding protein A9, mRNA (cDNA clone MGC:51841 IMAGE:6…
TC0100010035.hg.1	TC0100010035.hg.1	chr1	+	153416524	153423225	10	main	Coding	NM_176823 // RefSeq // Homo sapiens S100 calcium binding protein A7A (S100A7A), mRNA. // chr1 // 100 // 100 // 0 // --- // 0 /// ENST00000329256 // ENSEMBL // S100 calcium binding protein A7A [gene_biotype:protein_coding transcript_biotype:protein_coding] // chr1 // 100 // 100 // 0 // --- // 0 /// ENST00000368728 // ENSEMBL // S100 calcium binding protein A7A [gene_biotype:protein_coding transcri…
TC0100010039.hg.1	TC0100010039.hg.1	chr1	+	153545742	153551769	10	main	NonCoding	NR_125947 // RefSeq // Homo sapiens uncharacterized LOC101928034 (LOC101928034), long non-coding RNA. // chr1 // 100 // 100 // 0 // --- // 0 /// hsa_circ_0014232 // circbase // Salzman2013 ANTISENSE, CDS, coding, INTERNAL, intronic, OVCODE, OVEXON, UTR5 best transcript NM_002960 // chr1 // 100 // 100 // 0 // --- // 0 /// lnc-S100A1-1:1 // lncRNAWiki // Transcript Originally Identified by LNCipedi…
TC0100010043.hg.1	TC0100010043.hg.1	chr1	+	153627926	153632039	10	main	Multiple_Complex	NM_006271 // RefSeq // Homo sapiens S100 calcium binding protein A1 (S100A1), mRNA. // chr1 // 100 // 100 // 0 // --- // 0 /// ENST00000292169 // ENSEMBL // S100 calcium binding protein A1 [gene_biotype:protein_coding transcript_biotype:protein_coding] // chr1 // 100 // 100 // 0 // --- // 0 /// ENST00000368696 // ENSEMBL // S100 calcium binding protein A1 [gene_biotype:protein_coding transcript_b…
TC0100010044.hg.1	TC0100010044.hg.1	chr1	+	153633982	153646306	10	main	Multiple_Complex	NM_001206612 // RefSeq // Homo sapiens chromatin target of PRMT1 (CHTOP), transcript variant 2, mRNA. // chr1 // 100 // 100 // 0 // --- // 0 /// NM_001244664 // RefSeq // Homo sapiens chromatin target of PRMT1 (CHTOP), transcript variant 3, mRNA. // chr1 // 100 // 100 // 0 // --- // 0 /// NM_015607 // RefSeq // Homo sapiens chromatin target of PRMT1 (CHTOP), transcript variant 1, mRNA. // chr1 //…
TC0100010046.hg.1	TC0100010046.hg.1	chr1	+	153658654	153661852	10	main	Multiple_Complex	NM_012437 // RefSeq // Homo sapiens SNAP-associated protein (SNAPIN), transcript variant 1, mRNA. // chr1 // 100 // 100 // 0 // --- // 0 /// NR_052019 // RefSeq // Homo sapiens SNAP-associated protein (SNAPIN), transcript variant 2, non-coding RNA. // chr1 // 100 // 100 // 0 // --- // 0 /// NR_052020 // RefSeq // Homo sapiens SNAP-associated protein (SNAPIN), transcript variant 3, non-coding RNA.…
TC0100010047.hg.1	TC0100010047.hg.1	chr1	+	153678637	153693992	10	main	Multiple_Complex	NM_000906 // RefSeq // Homo sapiens natriuretic peptide receptor 1 (NPR1), mRNA. // chr1 // 100 // 100 // 0 // --- // 0 /// ENST00000368677 // ENSEMBL // natriuretic peptide receptor 1 [gene_biotype:protein_coding transcript_biotype:retained_intron] // chr1 // 100 // 100 // 0 // --- // 0 /// ENST00000368680 // ENSEMBL // natriuretic peptide receptor 1 [gene_biotype:protein_coding transcript_bioty…
TC0100010058.hg.1	TC0100010058.hg.1	chr1	+	153967534	153974364	10	main	Multiple_Complex	NM_001255978 // RefSeq // Homo sapiens cAMP responsive element binding protein 3-like 4 (CREB3L4), transcript variant 2, mRNA. // chr1 // 100 // 100 // 0 // --- // 0 /// NM_001255979 // RefSeq // Homo sapiens cAMP responsive element binding protein 3-like 4 (CREB3L4), transcript variant 3, mRNA. // chr1 // 100 // 100 // 0 // --- // 0 /// NM_001255980 // RefSeq // Homo sapiens cAMP responsive elem…
TC0100010060.hg.1	TC0100010060.hg.1	chr1	+	153990759	153992156	10	main	Multiple_Complex	NM_001030 // RefSeq // Homo sapiens ribosomal protein S27 (RPS27), mRNA. // chr1 // 100 // 100 // 0 // --- // 0 /// ENST00000368567 // ENSEMBL // ribosomal protein S27 [gene_biotype:protein_coding transcript_biotype:protein_coding] // chr1 // 100 // 100 // 0 // --- // 0 /// ENST00000392558 // ENSEMBL // ribosomal protein S27 [gene_biotype:protein_coding transcript_biotype:protein_coding] // chr1 …
TC0100010066.hg.1	TC0100010066.hg.1	chr1	+	154220172	154271510	10	main	Multiple_Complex	NM_001127320 // RefSeq // Homo sapiens ubiquitin associated protein 2-like (UBAP2L), transcript variant 2, mRNA. // chr1 // 100 // 100 // 0 // --- // 0 /// NM_001287815 // RefSeq // Homo sapiens ubiquitin associated protein 2-like (UBAP2L), transcript variant 3, mRNA. // chr1 // 100 // 100 // 0 // --- // 0 /// NM_001287816 // RefSeq // Homo sapiens ubiquitin associated protein 2-like (UBAP2L), tr…
TC0100010068.hg.1	TC0100010068.hg.1	chr1	+	154272511	154275879	10	main	Multiple_Complex	NM_001018837 // RefSeq // Homo sapiens HCLS1 associated protein X-1 (HAX1), transcript variant 2, mRNA. // chr1 // 100 // 100 // 0 // --- // 0 /// NM_006118 // RefSeq // Homo sapiens HCLS1 associated protein X-1 (HAX1), transcript variant 1, mRNA. // chr1 // 100 // 100 // 0 // --- // 0 /// ENST00000328703 // ENSEMBL // HCLS1 associated protein X-1 [gene_biotype:protein_coding transcript_biotype:p…
TC0100010074.hg.1	TC0100010074.hg.1	chr1	+	154321090	154325325	10	main	Multiple_Complex	NM_080429 // RefSeq // Homo sapiens aquaporin 10 (AQP10), mRNA. // chr1 // 100 // 100 // 0 // --- // 0 /// ENST00000324978 // ENSEMBL // aquaporin 10 [gene_biotype:protein_coding transcript_biotype:protein_coding] // chr1 // 100 // 100 // 0 // --- // 0 /// ENST00000355197 // ENSEMBL // aquaporin 10 [gene_biotype:protein_coding transcript_biotype:processed_transcript] // chr1 // 100 // 100 // 0 //…
TC0100010075.hg.1	TC0100010075.hg.1	chr1	+	154325553	154351307	10	main	Multiple_Complex	NM_001005855 // RefSeq // Homo sapiens ATPase, aminophospholipid transporter, class I, type 8B, member 2 (ATP8B2), transcript variant 2, mRNA. // chr1 // 100 // 100 // 0 // --- // 0 /// NM_020452 // RefSeq // Homo sapiens ATPase, aminophospholipid transporter, class I, type 8B, member 2 (ATP8B2), transcript variant 1, mRNA. // chr1 // 100 // 100 // 0 // --- // 0 /// ENST00000368487 // ENSEMBL // …
TC0100010078.hg.1	TC0100010078.hg.1	chr1	+	154405193	154469450	10	main	Multiple_Complex	NM_000565 // RefSeq // Homo sapiens interleukin 6 receptor (IL6R), transcript variant 1, mRNA. // chr1 // 100 // 100 // 0 // --- // 0 /// NM_001206866 // RefSeq // Homo sapiens interleukin 6 receptor (IL6R), transcript variant 3, mRNA. // chr1 // 100 // 100 // 0 // --- // 0 /// NM_181359 // RefSeq // Homo sapiens interleukin 6 receptor (IL6R), transcript variant 2, mRNA. // chr1 // 100 // 100 // …
TC0100010082.hg.1	TC0100010082.hg.1	chr1	+	154502219	154548147	10	main	Multiple_Complex	NM_001098475 // RefSeq // Homo sapiens tudor domain containing 10 (TDRD10), transcript variant 1, mRNA. // chr1 // 100 // 100 // 0 // --- // 0 /// NM_182499 // RefSeq // Homo sapiens tudor domain containing 10 (TDRD10), transcript variant 2, mRNA. // chr1 // 100 // 100 // 0 // --- // 0 /// ENST00000368480 // ENSEMBL // tudor domain containing 10 [gene_biotype:protein_coding transcript_biotype:pro…
TC0100010085.hg.1	TC0100010085.hg.1	chr1	+	154567781	154580026	10	main	Coding	NM_000748 // RefSeq // Homo sapiens cholinergic receptor, nicotinic, beta 2 (neuronal) (CHRNB2), mRNA. // chr1 // 100 // 100 // 0 // --- // 0 /// ENST00000368476 // ENSEMBL // cholinergic receptor, nicotinic, beta 2 (neuronal) [gene_biotype:protein_coding transcript_biotype:protein_coding] // chr1 // 100 // 100 // 0 // --- // 0 /// BC075040 // GenBank // Homo sapiens cholinergic receptor, nicotin…
TC0100010100.hg.1	TC0100010100.hg.1	chr1	+	154974642	154979249	10	main	Multiple_Complex	NM_001826 // RefSeq // Homo sapiens CDC28 protein kinase regulatory subunit 1B (CKS1B), transcript variant 1, mRNA. // chr1 // 100 // 100 // 0 // --- // 0 /// NR_024163 // RefSeq // Homo sapiens CDC28 protein kinase regulatory subunit 1B (CKS1B), transcript variant 2, non-coding RNA. // chr1 // 100 // 100 // 0 // --- // 0 /// ENST00000308987 // ENSEMBL // CDC28 protein kinase regulatory subunit 1…
TC0100010102.hg.1	TC0100010102.hg.1	chr1	+	154983294	154993111	10	main	Multiple_Complex	NM_001184891 // RefSeq // Homo sapiens flavin adenine dinucleotide synthetase 1 (FLAD1), transcript variant 3, mRNA. // chr1 // 100 // 100 // 0 // --- // 0 /// NM_001184892 // RefSeq // Homo sapiens flavin adenine dinucleotide synthetase 1 (FLAD1), transcript variant 4, mRNA. // chr1 // 100 // 100 // 0 // --- // 0 /// NM_025207 // RefSeq // Homo sapiens flavin adenine dinucleotide synthetase 1 (F…
TC0100010103.hg.1	TC0100010103.hg.1	chr1	+	154993586	154994315	10	main	Coding	NM_018655 // RefSeq // Homo sapiens lens epithelial protein (LENEP), mRNA. // chr1 // 100 // 100 // 0 // --- // 0 /// ENST00000368427 // ENSEMBL // lens epithelial protein [gene_biotype:protein_coding transcript_biotype:nonsense_mediated_decay] // chr1 // 100 // 100 // 0 // --- // 0 /// ENST00000392487 // ENSEMBL // lens epithelial protein [gene_biotype:protein_coding transcript_biotype:protein_c…
TC0100010104.hg.1	TC0100010104.hg.1	chr1	+	155002630	155018525	10	main	Multiple_Complex	NM_001252406 // RefSeq // Homo sapiens zinc finger and BTB domain containing 7B (ZBTB7B), transcript variant 3, mRNA. // chr1 // 100 // 100 // 0 // --- // 0 /// NM_001256455 // RefSeq // Homo sapiens zinc finger and BTB domain containing 7B (ZBTB7B), transcript variant 5, mRNA. // chr1 // 100 // 100 // 0 // --- // 0 /// NR_045515 // RefSeq // Homo sapiens zinc finger and BTB domain containing 7B …
TC0100010111.hg.1	TC0100010111.hg.1	chr1	+	155127460	155134910	10	main	Multiple_Complex	NM_004428 // RefSeq // Homo sapiens ephrin-A1 (EFNA1), transcript variant 1, mRNA. // chr1 // 100 // 100 // 0 // --- // 0 /// NM_182685 // RefSeq // Homo sapiens ephrin-A1 (EFNA1), transcript variant 2, mRNA. // chr1 // 100 // 100 // 0 // --- // 0 /// ENST00000368406 // ENSEMBL // ephrin-A1 [gene_biotype:protein_coding transcript_biotype:protein_coding] // chr1 // 100 // 100 // 0 // --- // 0 /// …
TC0100010112.hg.1	TC0100010112.hg.1	chr1	+	155135344	155138858	10	main	Multiple_Complex	NM_001122837 // RefSeq // Homo sapiens solute carrier family 50 (sugar efflux transporter), member 1 (SLC50A1), transcript variant 2, mRNA. // chr1 // 100 // 100 // 0 // --- // 0 /// NM_001122839 // RefSeq // Homo sapiens solute carrier family 50 (sugar efflux transporter), member 1 (SLC50A1), transcript variant 3, mRNA. // chr1 // 100 // 100 // 0 // --- // 0 /// NM_001287586 // RefSeq // Homo sa…
TC0100010115.hg.1	TC0100010115.hg.1	chr1	+	155173787	155184971	10	main	Multiple_Complex	NM_001256599 // RefSeq // Homo sapiens tripartite motif containing 46 (TRIM46), transcript variant 2, mRNA. // chr1 // 100 // 100 // 0 // --- // 0 /// NM_001256600 // RefSeq // Homo sapiens tripartite motif containing 46 (TRIM46), transcript variant 3, mRNA. // chr1 // 100 // 100 // 0 // --- // 0 /// NM_001256601 // RefSeq // Homo sapiens tripartite motif containing 46 (TRIM46), transcript varian…
TC0100010121.hg.1	TC0100010121.hg.1	chr1	+	155277427	155289848	10	main	Multiple_Complex	NM_020897 // RefSeq // Homo sapiens hyperpolarization activated cyclic nucleotide gated potassium channel 3 (HCN3), transcript variant 1, mRNA. // chr1 // 100 // 100 // 0 // --- // 0 /// NR_073074 // RefSeq // Homo sapiens hyperpolarization activated cyclic nucleotide gated potassium channel 3 (HCN3), transcript variant 2, non-coding RNA. // chr1 // 100 // 100 // 0 // --- // 0 /// ENST00000368358…
TC0100010123.hg.1	TC0100010123.hg.1	chr1	+	155308748	155320666	10	main	Multiple_Complex	NM_001135821 // RefSeq // Homo sapiens farnesyl diphosphate synthase (FDPS), transcript variant 2, mRNA. // chr1 // 100 // 100 // 0 // --- // 0 /// NM_001135822 // RefSeq // Homo sapiens farnesyl diphosphate synthase (FDPS), transcript variant 3, mRNA. // chr1 // 100 // 100 // 0 // --- // 0 /// NM_001242824 // RefSeq // Homo sapiens farnesyl diphosphate synthase (FDPS), transcript variant 4, mRNA…
TC0100010124.hg.1	TC0100010124.hg.1	chr1	+	155320849	155331118	10	main	Multiple_Complex	NM_001105203 // RefSeq // Homo sapiens RUN and SH3 domain containing 1 (RUSC1), transcript variant 1, mRNA. // chr1 // 100 // 100 // 0 // --- // 0 /// NM_001105204 // RefSeq // Homo sapiens RUN and SH3 domain containing 1 (RUSC1), transcript variant 2, mRNA. // chr1 // 100 // 100 // 0 // --- // 0 /// NM_001105205 // RefSeq // Homo sapiens RUN and SH3 domain containing 1 (RUSC1), transcript varian…
TC0100010129.hg.1	TC0100010129.hg.1	chr1	+	155561981	155563984	10	main	NonCoding	NR_027023 // RefSeq // Homo sapiens ASH1L antisense RNA 1 (ASH1L-AS1), long non-coding RNA. // chr1 // 100 // 100 // 0 // --- // 0 /// ENST00000452809.1 // lncRNAWiki // ASH1L antisense RNA 1 [Source:HGNC Symbol;Acc:HGNC:44146] // chr1 // 100 // 100 // 0 // --- // 0 /// ENST00000456633.1 // lncRNAWiki // ASH1L antisense RNA 1 [Source:HGNC Symbol;Acc:HGNC:44146] // chr1 // 100 // 100 // 0 // --- /…
TC0100010133.hg.1	TC0100010133.hg.1	chr1	+	155610170	155614967	10	main	Multiple_Complex	NM_001256532 // RefSeq // Homo sapiens misato 1, mitochondrial distribution and morphology regulator (MSTO1), transcript variant 2, mRNA. // chr1 // 100 // 100 // 0 // --- // 0 /// NM_001256533 // RefSeq // Homo sapiens misato 1, mitochondrial distribution and morphology regulator (MSTO1), transcript variant 3, mRNA. // chr1 // 100 // 100 // 0 // --- // 0 /// NM_018116 // RefSeq // Homo sapiens m…
TC0100010134.hg.1	TC0100010134.hg.1	chr1	+	155687960	155739010	10	main	Multiple_Complex	NM_001199849 // RefSeq // Homo sapiens death associated protein 3 (DAP3), transcript variant 3, mRNA. // chr1 // 100 // 100 // 0 // --- // 0 /// NM_001199850 // RefSeq // Homo sapiens death associated protein 3 (DAP3), transcript variant 4, mRNA. // chr1 // 100 // 100 // 0 // --- // 0 /// NM_001199851 // RefSeq // Homo sapiens death associated protein 3 (DAP3), transcript variant 5, mRNA. // chr1…
TC0100010140.hg.1	TC0100010140.hg.1	chr1	+	155859469	155885199	10	main	Coding	NM_152280 // RefSeq // Homo sapiens synaptotagmin XI (SYT11), mRNA. // chr1 // 100 // 100 // 0 // --- // 0 /// ENST00000368324 // ENSEMBL // synaptotagmin XI [gene_biotype:protein_coding transcript_biotype:protein_coding] // chr1 // 100 // 100 // 0 // --- // 0 /// BC004291 // GenBank // Homo sapiens synaptotagmin XI, mRNA (cDNA clone MGC:10881 IMAGE:3621175), complete cds. // chr1 // 100 // 100 /…
TC0100010144.hg.1	TC0100010144.hg.1	chr1	+	155941689	155942949	10	main	Coding	NM_181885 // RefSeq // Homo sapiens relaxin/insulin-like family peptide receptor 4 (RXFP4), mRNA. // chr1 // 100 // 100 // 0 // --- // 0 /// ENST00000368318 // ENSEMBL // relaxin/insulin-like family peptide receptor 4 [gene_biotype:protein_coding transcript_biotype:protein_coding] // chr1 // 100 // 100 // 0 // --- // 0 /// BC101507 // GenBank // Homo sapiens relaxin/insulin-like family peptide re…
TC0100010148.hg.1	TC0100010148.hg.1	chr1	+	156054726	156058510	10	main	Multiple_Complex	NM_001145264 // RefSeq // Homo sapiens late endosomal/lysosomal adaptor, MAPK and MTOR activator 2 (LAMTOR2), transcript variant 2, mRNA. // chr1 // 100 // 100 // 0 // --- // 0 /// NM_014017 // RefSeq // Homo sapiens late endosomal/lysosomal adaptor, MAPK and MTOR activator 2 (LAMTOR2), transcript variant 1, mRNA. // chr1 // 100 // 100 // 0 // --- // 0 /// ENST00000368302 // ENSEMBL // late endos…
TC0100010149.hg.1	TC0100010149.hg.1	chr1	+	156061160	156070514	10	main	Multiple_Complex	NM_020387 // RefSeq // Homo sapiens RAB25, member RAS oncogene family (RAB25), mRNA. // chr1 // 100 // 100 // 0 // --- // 0 /// ENST00000361084 // ENSEMBL // RAB25, member RAS oncogene family [gene_biotype:protein_coding transcript_biotype:protein_coding] // chr1 // 100 // 100 // 0 // --- // 0 /// ENST00000463614 // ENSEMBL // RAB25, member RAS oncogene family [gene_biotype:protein_coding transcr…
TC0100010152.hg.1	TC0100010152.hg.1	chr1	+	156082546	156140089	10	main	Multiple_Complex	NM_001257374 // RefSeq // Homo sapiens lamin A/C (LMNA), transcript variant 4, mRNA. // chr1 // 100 // 100 // 0 // --- // 0 /// NM_001282624 // RefSeq // Homo sapiens lamin A/C (LMNA), transcript variant 5, mRNA. // chr1 // 100 // 100 // 0 // --- // 0 /// NM_001282625 // RefSeq // Homo sapiens lamin A/C (LMNA), transcript variant 6, mRNA. // chr1 // 100 // 100 // 0 // --- // 0 /// NM_001282626 //…
TC0100010155.hg.1	TC0100010155.hg.1	chr1	+	156147366	156177752	10	main	Multiple_Complex	NM_001193300 // RefSeq // Homo sapiens sema domain, immunoglobulin domain (Ig), transmembrane domain (TM) and short cytoplasmic domain, (semaphorin) 4A (SEMA4A), transcript variant 2, mRNA. // chr1 // 100 // 100 // 0 // --- // 0 /// NM_001193301 // RefSeq // Homo sapiens sema domain, immunoglobulin domain (Ig), transmembrane domain (TM) and short cytoplasmic domain, (semaphorin) 4A (SEMA4A), tran…
TC0100010159.hg.1	TC0100010159.hg.1	chr1	+	156193932	156212796	10	main	Multiple_Complex	NM_001286184 // RefSeq // Homo sapiens solute carrier family 25, member 44 (SLC25A44), transcript variant 1, mRNA. // chr1 // 100 // 100 // 0 // --- // 0 /// NM_014655 // RefSeq // Homo sapiens solute carrier family 25, member 44 (SLC25A44), transcript variant 2, mRNA. // chr1 // 100 // 100 // 0 // --- // 0 /// NR_104408 // RefSeq // Homo sapiens solute carrier family 25, member 44 (SLC25A44), tr…
TC0100010161.hg.1	TC0100010161.hg.1	chr1	+	156212982	156243332	10	main	Multiple_Complex	NM_001199653 // RefSeq // Homo sapiens polyamine-modulated factor 1 (PMF1), transcript variant 3, mRNA. // chr1 // 100 // 100 // 0 // --- // 0 /// NM_001199654 // RefSeq // Homo sapiens polyamine-modulated factor 1 (PMF1), transcript variant 1, mRNA. // chr1 // 100 // 100 // 0 // --- // 0 /// NM_001199661 // RefSeq // Homo sapiens PMF1-BGLAP readthrough (PMF1-BGLAP), transcript variant 1, mRNA. /…
TC0100010164.hg.1	TC0100010164.hg.1	chr1	+	156282913	156293185	10	main	Multiple_Complex	NM_032323 // RefSeq // Homo sapiens transmembrane protein 79 (TMEM79), transcript variant 1, mRNA. // chr1 // 100 // 100 // 0 // --- // 0 /// NR_026678 // RefSeq // Homo sapiens transmembrane protein 79 (TMEM79), transcript variant 2, non-coding RNA. // chr1 // 100 // 100 // 0 // --- // 0 /// ENST00000295694 // ENSEMBL // transmembrane protein 79 [gene_biotype:protein_coding transcript_biotype:pr…
TC0100010167.hg.1	TC0100010167.hg.1	chr1	+	156337314	156346995	10	main	Multiple_Complex	NM_001304817 // RefSeq // Homo sapiens TSSK6 activating co-chaperone (TSACC), transcript variant 3, mRNA. // chr1 // 100 // 100 // 0 // --- // 0 /// NM_001304818 // RefSeq // Homo sapiens TSSK6 activating co-chaperone (TSACC), transcript variant 3, mRNA. // chr1 // 100 // 100 // 0 // --- // 0 /// NM_001304819 // RefSeq // Homo sapiens TSSK6 activating co-chaperone (TSACC), transcript variant 5, m…
TC0100010168.hg.1	TC0100010168.hg.1	chr1	+	156369189	156385221	10	main	Multiple_Complex	NM_001256395 // RefSeq // Homo sapiens Rh family, B glycoprotein (gene/pseudogene) (RHBG), transcript variant 2, mRNA. // chr1 // 100 // 100 // 0 // --- // 0 /// NM_001256396 // RefSeq // Homo sapiens Rh family, B glycoprotein (gene/pseudogene) (RHBG), transcript variant 3, mRNA. // chr1 // 100 // 100 // 0 // --- // 0 /// NM_020407 // RefSeq // Homo sapiens Rh family, B glycoprotein (gene/pseudog…
TC0100010184.hg.1	TC0100010184.hg.1	chr1	+	156579727	156586770	10	main	Multiple_Complex	NM_001105669 // RefSeq // Homo sapiens tetratricopeptide repeat domain 24 (TTC24), mRNA. // chr1 // 100 // 100 // 0 // --- // 0 /// ENST00000368236 // ENSEMBL // tetratricopeptide repeat domain 24 [gene_biotype:protein_coding transcript_biotype:protein_coding] // chr1 // 100 // 100 // 0 // --- // 0 /// ENST00000368237 // ENSEMBL // tetratricopeptide repeat domain 24 [gene_biotype:protein_coding t…
TC0100010185.hg.1	TC0100010185.hg.1	chr1	+	156591762	156596809	10	main	Multiple_Complex	NM_144772 // RefSeq // Homo sapiens apolipoprotein A-I binding protein (APOA1BP), mRNA. // chr1 // 100 // 100 // 0 // --- // 0 /// ENST00000368233 // ENSEMBL // apolipoprotein A-I binding protein [gene_biotype:protein_coding transcript_biotype:protein_coding] // chr1 // 100 // 100 // 0 // --- // 0 /// ENST00000368234 // ENSEMBL // apolipoprotein A-I binding protein [gene_biotype:protein_coding tr…
TC0100010187.hg.1	TC0100010187.hg.1	chr1	+	156619294	156625725	10	main	Multiple_Complex	NM_021817 // RefSeq // Homo sapiens hyaluronan and proteoglycan link protein 2 (HAPLN2), mRNA. // chr1 // 100 // 100 // 0 // --- // 0 /// ENST00000255039 // ENSEMBL // hyaluronan and proteoglycan link protein 2 [gene_biotype:protein_coding transcript_biotype:protein_coding] // chr1 // 100 // 100 // 0 // --- // 0 /// ENST00000456112 // ENSEMBL // hyaluronan and proteoglycan link protein 2 [gene_bi…
TC0100010188.hg.1	TC0100010188.hg.1	chr1	+	156641390	156659532	10	main	Multiple_Complex	NM_021948 // RefSeq // Homo sapiens brevican (BCAN), transcript variant 1, mRNA. // chr1 // 100 // 100 // 0 // --- // 0 /// NM_198427 // RefSeq // Homo sapiens brevican (BCAN), transcript variant 2, mRNA. // chr1 // 100 // 100 // 0 // --- // 0 /// ENST00000329117 // ENSEMBL // brevican [gene_biotype:protein_coding transcript_biotype:protein_coding] // chr1 // 100 // 100 // 0 // --- // 0 /// ENST0…
TC0100010192.hg.1	TC0100010192.hg.1	chr1	+	156728442	156736960	10	main	Multiple_Complex	NM_001142560 // RefSeq // Homo sapiens ribosomal RNA adenine dimethylase domain containing 1 (RRNAD1), transcript variant 2, mRNA. // chr1 // 100 // 100 // 0 // --- // 0 /// NM_015997 // RefSeq // Homo sapiens ribosomal RNA adenine dimethylase domain containing 1 (RRNAD1), transcript variant 1, mRNA. // chr1 // 100 // 100 // 0 // --- // 0 /// ENST00000368216 // ENSEMBL // ribosomal RNA adenine di…
TC0100010193.hg.1	TC0100010193.hg.1	chr1	+	156750610	156800817	10	main	Multiple_Complex	NM_005973 // RefSeq // Homo sapiens papillary renal cell carcinoma (translocation-associated) (PRCC), mRNA. // chr1 // 100 // 100 // 0 // --- // 0 /// ENST00000271526 // ENSEMBL // papillary renal cell carcinoma (translocation-associated) [gene_biotype:protein_coding transcript_biotype:protein_coding] // chr1 // 100 // 100 // 0 // --- // 0 /// ENST00000454659 // ENSEMBL // papillary renal cell ca…
TC0100010196.hg.1	TC0100010196.hg.1	chr1	+	156815640	156881850	10	main	Multiple_Complex	NM_001007792 // RefSeq // Homo sapiens neurotrophic tyrosine kinase, receptor, type 1 (NTRK1), transcript variant 3, mRNA. // chr1 // 100 // 100 // 0 // --- // 0 /// NM_001012331 // RefSeq // Homo sapiens neurotrophic tyrosine kinase, receptor, type 1 (NTRK1), transcript variant 1, mRNA. // chr1 // 100 // 100 // 0 // --- // 0 /// NM_002529 // RefSeq // Homo sapiens neurotrophic tyrosine kinase, r…
TC0100010197.hg.1	TC0100010197.hg.1	chr1	+	156893698	156916434	10	main	Multiple_Complex	NM_001080471 // RefSeq // Homo sapiens platelet endothelial aggregation receptor 1 (PEAR1), mRNA. // chr1 // 100 // 100 // 0 // --- // 0 /// ENST00000292357 // ENSEMBL // platelet endothelial aggregation receptor 1 [gene_biotype:protein_coding transcript_biotype:protein_coding] // chr1 // 100 // 100 // 0 // --- // 0 /// ENST00000338302 // ENSEMBL // platelet endothelial aggregation receptor 1 [ge…
TC0100010198.hg.1	TC0100010198.hg.1	chr1	+	156920632	156933094	10	main	Multiple_Complex	NM_144702 // RefSeq // Homo sapiens leucine rich repeat containing 71 (LRRC71), mRNA. // chr1 // 100 // 100 // 0 // --- // 0 /// ENST00000337428 // ENSEMBL // leucine rich repeat containing 71 [gene_biotype:protein_coding transcript_biotype:protein_coding] // chr1 // 100 // 100 // 0 // --- // 0 /// ENST00000472465 // ENSEMBL // leucine rich repeat containing 71 [gene_biotype:protein_coding transc…
TC0100010218.hg.1	TC0100010218.hg.1	chr1	+	157993273	158100262	10	main	Multiple_Complex	NM_001286349 // RefSeq // Homo sapiens kin of IRRE like (Drosophila) (KIRREL), transcript variant 2, mRNA. // chr1 // 100 // 100 // 0 // --- // 0 /// NM_018240 // RefSeq // Homo sapiens kin of IRRE like (Drosophila) (KIRREL), transcript variant 1, mRNA. // chr1 // 100 // 100 // 0 // --- // 0 /// ENST00000359209 // ENSEMBL // kin of IRRE like (Drosophila) [gene_biotype:protein_coding transcript_bi…
TC0100010227.hg.1	TC0100010227.hg.1	chr1	+	158179947	158186426	10	main	Coding	NM_001766 // RefSeq // Homo sapiens CD1d molecule (CD1D), mRNA. // chr1 // 100 // 100 // 0 // --- // 0 /// ENST00000368171 // ENSEMBL // CD1d molecule [gene_biotype:protein_coding transcript_biotype:protein_coding] // chr1 // 100 // 100 // 0 // --- // 0 /// BC027926 // GenBank // Homo sapiens CD1d molecule, mRNA (cDNA clone MGC:34622 IMAGE:5229534), complete cds. // chr1 // 100 // 100 // 0 // ---…
TC0100010228.hg.1	TC0100010228.hg.1	chr1	+	158204428	158258269	10	main	Multiple_Complex	NM_001763 // RefSeq // Homo sapiens CD1a molecule (CD1A), mRNA. // chr1 // 100 // 100 // 0 // --- // 0 /// ENST00000289429 // ENSEMBL // CD1a molecule [gene_biotype:protein_coding transcript_biotype:protein_coding] // chr1 // 100 // 100 // 0 // --- // 0 /// BC031645 // GenBank // Homo sapiens CD1a molecule, mRNA (cDNA clone MGC:35168 IMAGE:5170038), complete cds. // chr1 // 100 // 100 // 0 // ---…
TC0100010230.hg.1	TC0100010230.hg.1	chr1	+	158289773	158294774	10	main	Multiple_Complex	NM_001765 // RefSeq // Homo sapiens CD1c molecule (CD1C), mRNA. // chr1 // 100 // 100 // 0 // --- // 0 /// ENST00000368170 // ENSEMBL // CD1c molecule [gene_biotype:protein_coding transcript_biotype:protein_coding] // chr1 // 100 // 100 // 0 // --- // 0 /// ENST00000443761 // ENSEMBL // CD1c molecule [gene_biotype:protein_coding transcript_biotype:protein_coding] // chr1 // 100 // 100 // 0 // ---…
TC0100010231.hg.1	TC0100010231.hg.1	chr1	+	158353696	158357553	10	main	Multiple_Complex	NM_001042583 // RefSeq // Homo sapiens CD1e molecule (CD1E), transcript variant 2, mRNA. // chr1 // 100 // 100 // 0 // --- // 0 /// NM_001042584 // RefSeq // Homo sapiens CD1e molecule (CD1E), transcript variant 3, mRNA. // chr1 // 100 // 100 // 0 // --- // 0 /// NM_001042585 // RefSeq // Homo sapiens CD1e molecule (CD1E), transcript variant 4, mRNA. // chr1 // 100 // 100 // 0 // --- // 0 /// NM_…
TC0100010233.hg.1	TC0100010233.hg.1	chr1	+	158465482	158466554	10	main	Coding	NM_001004473 // RefSeq // Homo sapiens olfactory receptor, family 10, subfamily K, member 1 (OR10K1), mRNA. // chr1 // 100 // 100 // 0 // --- // 0 /// ENST00000289451 // ENSEMBL // olfactory receptor, family 10, subfamily K, member 1 [gene_biotype:protein_coding transcript_biotype:protein_coding] // chr1 // 100 // 100 // 0 // --- // 0 /// BC137323 // GenBank // Homo sapiens olfactory receptor, fa…
TC0100010234.hg.1	TC0100010234.hg.1	chr1	+	158479878	158480885	10	main	Coding	NM_001004472 // RefSeq // Homo sapiens olfactory receptor, family 10, subfamily R, member 2 (OR10R2), mRNA. // chr1 // 100 // 100 // 0 // --- // 0 /// ENST00000368152 // ENSEMBL // olfactory receptor, family 10, subfamily R, member 2 [gene_biotype:protein_coding transcript_biotype:protein_coding] // chr1 // 100 // 100 // 0 // --- // 0 /// OTTHUMT00000051847 // Havana transcript // olfactory recep…
TC0100010238.hg.1	TC0100010238.hg.1	chr1	+	158606439	158607380	10	main	Coding	NM_001004478 // RefSeq // Homo sapiens olfactory receptor, family 10, subfamily Z, member 1 (OR10Z1), mRNA. // chr1 // 100 // 100 // 0 // --- // 0 /// ENST00000361284 // ENSEMBL // olfactory receptor, family 10, subfamily Z, member 1 [gene_biotype:protein_coding transcript_biotype:protein_coding] // chr1 // 100 // 100 // 0 // --- // 0 /// OTTHUMT00000051853 // Havana transcript // olfactory recep…
TC0100010239.hg.1	TC0100010239.hg.1	chr1	+	158754720	158755891	10	main	Coding	NM_001005184 // RefSeq // Homo sapiens olfactory receptor, family 6, subfamily K, member 6 (OR6K6), mRNA. // chr1 // 100 // 100 // 0 // --- // 0 /// ENST00000368144 // ENSEMBL // olfactory receptor, family 6, subfamily K, member 6 [gene_biotype:protein_coding transcript_biotype:protein_coding] // chr1 // 100 // 100 // 0 // --- // 0 /// BC140743 // GenBank // Homo sapiens olfactory receptor, famil…
TC0100010241.hg.1	TC0100010241.hg.1	chr1	+	158831317	158849506	10	main	Multiple_Complex	NM_002432 // RefSeq // Homo sapiens myeloid cell nuclear differentiation antigen (MNDA), mRNA. // chr1 // 100 // 100 // 0 // --- // 0 /// ENST00000368141 // ENSEMBL // myeloid cell nuclear differentiation antigen [gene_biotype:protein_coding transcript_biotype:protein_coding] // chr1 // 100 // 100 // 0 // --- // 0 /// ENST00000438394 // ENSEMBL // myeloid cell nuclear differentiation antigen [gen…
TC0100010243.hg.1	TC0100010243.hg.1	chr1	+	158930796	158977059	10	main	Multiple_Complex	NM_152501 // RefSeq // Homo sapiens pyrin and HIN domain family, member 1 (PYHIN1), transcript variant 1, mRNA. // chr1 // 100 // 100 // 0 // --- // 0 /// NM_198928 // RefSeq // Homo sapiens pyrin and HIN domain family, member 1 (PYHIN1), transcript variant 2, mRNA. // chr1 // 100 // 100 // 0 // --- // 0 /// NM_198929 // RefSeq // Homo sapiens pyrin and HIN domain family, member 1 (PYHIN1), trans…
TC0100010244.hg.1	TC0100010244.hg.1	chr1	+	158999968	159055155	10	main	Multiple_Complex	NM_001206567 // RefSeq // Homo sapiens interferon, gamma-inducible protein 16 (IFI16), transcript variant 1, mRNA. // chr1 // 100 // 100 // 0 // --- // 0 /// NM_005531 // RefSeq // Homo sapiens interferon, gamma-inducible protein 16 (IFI16), transcript variant 2, mRNA. // chr1 // 100 // 100 // 0 // --- // 0 /// ENST00000295809 // ENSEMBL // interferon, gamma-inducible protein 16 [gene_biotype:pro…
TC0100010252.hg.1	TC0100010252.hg.1	chr1	+	159289714	159308224	10	main	Coding	NM_002001 // RefSeq // Homo sapiens Fc fragment of IgE, high affinity I, receptor for; alpha polypeptide (FCER1A), mRNA. // chr1 // 100 // 100 // 0 // --- // 0 /// ENST00000368114 // ENSEMBL // Fc fragment of IgE, high affinity I, receptor for; alpha polypeptide [gene_biotype:protein_coding transcript_biotype:protein_coding] // chr1 // 100 // 100 // 0 // --- // 0 /// ENST00000368115 // ENSEMBL //…
TC0100010255.hg.1	TC0100010255.hg.1	chr1	+	159432204	159433138	10	main	Pseudogene	uc057mgz.1 // UCSC Genes // olfactory receptor, family 10, subfamily J, member 4 (gene/pseudogene) [Source:HGNC Symbol;Acc:HGNC:15408] // chr1 // 100 // 100 // 0 // --- // 0 /// ENST00000504970 // ENSEMBL // olfactory receptor, family 10, subfamily J, member 4 (gene/pseudogene) [gene_biotype:polymorphic_pseudogene transcript_biotype:polymorphic_pseudogene] // chr1 // 100 // 100 // 0 // --- // 0 /…
TC0100010256.hg.1	TC0100010256.hg.1	chr1	+	159439722	159440811	10	main	Coding	NM_012351 // RefSeq // Homo sapiens olfactory receptor, family 10, subfamily J, member 1 (OR10J1), mRNA. // chr1 // 100 // 100 // 0 // --- // 0 /// ENST00000423932 // ENSEMBL // olfactory receptor, family 10, subfamily J, member 1 [gene_biotype:protein_coding transcript_biotype:protein_coding] // chr1 // 100 // 100 // 0 // --- // 0 /// BC069150 // GenBank // Homo sapiens olfactory receptor, famil…
TC0100010259.hg.1	TC0100010259.hg.1	chr1	+	159587825	159588871	10	main	Coding	NM_001639 // RefSeq // Homo sapiens amyloid P component, serum (APCS), mRNA. // chr1 // 100 // 100 // 0 // --- // 0 /// ENST00000255040 // ENSEMBL // amyloid P component, serum [gene_biotype:protein_coding transcript_biotype:protein_coding] // chr1 // 100 // 100 // 0 // --- // 0 /// BC007039 // GenBank // Homo sapiens amyloid P component, serum, mRNA (cDNA clone MGC:12419 IMAGE:3935086), complete…
TC0100010267.hg.1	TC0100010267.hg.1	chr1	+	159780932	159782543	10	main	Multiple_Complex	NM_017823 // RefSeq // Homo sapiens dual specificity phosphatase 23 (DUSP23), mRNA. // chr1 // 100 // 100 // 0 // --- // 0 /// ENST00000368107 // ENSEMBL // dual specificity phosphatase 23 [gene_biotype:protein_coding transcript_biotype:protein_coding] // chr1 // 100 // 100 // 0 // --- // 0 /// ENST00000368108 // ENSEMBL // dual specificity phosphatase 23 [gene_biotype:protein_coding transcript_b…
TC0100010268.hg.1	TC0100010268.hg.1	chr1	+	159800511	159816257	10	main	Multiple_Complex	NM_001004310 // RefSeq // Homo sapiens Fc receptor-like 6 (FCRL6), transcript variant 1, mRNA. // chr1 // 100 // 100 // 0 // --- // 0 /// NM_001284217 // RefSeq // Homo sapiens Fc receptor-like 6 (FCRL6), transcript variant 2, mRNA. // chr1 // 100 // 100 // 0 // --- // 0 /// ENST00000321935 // ENSEMBL // Fc receptor-like 6 [gene_biotype:protein_coding transcript_biotype:protein_coding] // chr1 //…
TC0100010269.hg.1	TC0100010269.hg.1	chr1	+	159826689	159837492	10	main	Multiple_Complex	NM_020125 // RefSeq // Homo sapiens SLAM family member 8 (SLAMF8), mRNA. // chr1 // 100 // 100 // 0 // --- // 0 /// ENST00000289707 // ENSEMBL // SLAM family member 8 [gene_biotype:protein_coding transcript_biotype:protein_coding] // chr1 // 100 // 100 // 0 // --- // 0 /// ENST00000368104 // ENSEMBL // SLAM family member 8 [gene_biotype:protein_coding transcript_biotype:protein_coding] // chr1 //…
TC0100010280.hg.1	TC0100010280.hg.1	chr1	+	160081570	160090563	10	main	Multiple_Complex	NM_004983 // RefSeq // Homo sapiens potassium channel, inwardly rectifying subfamily J, member 9 (KCNJ9), mRNA. // chr1 // 100 // 100 // 0 // --- // 0 /// ENST00000368088 // ENSEMBL // potassium channel, inwardly rectifying subfamily J, member 9 [gene_biotype:protein_coding transcript_biotype:protein_coding] // chr1 // 100 // 100 // 0 // --- // 0 /// OTTHUMT00000060628 // Havana transcript // pot…
TC0100010281.hg.1	TC0100010281.hg.1	chr1	+	160115730	160143591	10	main	Multiple_Complex	NM_000702 // RefSeq // Homo sapiens ATPase, Na+/K+ transporting, alpha 2 polypeptide (ATP1A2), mRNA. // chr1 // 100 // 100 // 0 // --- // 0 /// ENST00000361216 // ENSEMBL // ATPase, Na+/K+ transporting, alpha 2 polypeptide [gene_biotype:protein_coding transcript_biotype:protein_coding] // chr1 // 100 // 100 // 0 // --- // 0 /// ENST00000392233 // ENSEMBL // ATPase, Na+/K+ transporting, alpha 2 po…
TC0100010282.hg.1	TC0100010282.hg.1	chr1	+	160151562	160186977	10	main	Multiple_Complex	NM_001001734 // RefSeq // Homo sapiens ATPase, Na+/K+ transporting, alpha 4 polypeptide (ATP1A4), transcript variant 2, mRNA. // chr1 // 100 // 100 // 0 // --- // 0 /// NM_144699 // RefSeq // Homo sapiens ATPase, Na+/K+ transporting, alpha 4 polypeptide (ATP1A4), transcript variant 1, mRNA. // chr1 // 100 // 100 // 0 // --- // 0 /// ENST00000368081 // ENSEMBL // ATPase, Na+/K+ transporting, alpha…
TC0100010283.hg.1	TC0100010283.hg.1	chr1	+	160190495	160201886	10	main	Multiple_Complex	NM_001231 // RefSeq // Homo sapiens calsequestrin 1 (fast-twitch, skeletal muscle) (CASQ1), mRNA. // chr1 // 100 // 100 // 0 // --- // 0 /// ENST00000368078 // ENSEMBL // calsequestrin 1 (fast-twitch, skeletal muscle) [gene_biotype:protein_coding transcript_biotype:protein_coding] // chr1 // 100 // 100 // 0 // --- // 0 /// ENST00000467691 // ENSEMBL // calsequestrin 1 (fast-twitch, skeletal muscl…
TC0100010284.hg.1	TC0100010284.hg.1	chr1	+	160205319	160215376	10	main	Multiple_Complex	NM_001297576 // RefSeq // Homo sapiens phosphoprotein enriched in astrocytes 15 (PEA15), transcript variant 1, mRNA. // chr1 // 100 // 100 // 0 // --- // 0 /// NM_001297577 // RefSeq // Homo sapiens phosphoprotein enriched in astrocytes 15 (PEA15), transcript variant 3, mRNA. // chr1 // 100 // 100 // 0 // --- // 0 /// NM_001297578 // RefSeq // Homo sapiens phosphoprotein enriched in astrocytes 15…
TC0100010297.hg.1	TC0100010297.hg.1	chr1	+	160343272	160358952	10	main	Multiple_Complex	NM_001290184 // RefSeq // Homo sapiens nicastrin (NCSTN), transcript variant 2, mRNA. // chr1 // 100 // 100 // 0 // --- // 0 /// NM_001290186 // RefSeq // Homo sapiens nicastrin (NCSTN), transcript variant 3, mRNA. // chr1 // 100 // 100 // 0 // --- // 0 /// NM_015331 // RefSeq // Homo sapiens nicastrin (NCSTN), transcript variant 1, mRNA. // chr1 // 100 // 100 // 0 // --- // 0 /// ENST00000294785…
TC0100010299.hg.1	TC0100010299.hg.1	chr1	+	160367067	160372848	10	main	Coding	NM_005598 // RefSeq // Homo sapiens nescient helix loop helix 1 (NHLH1), mRNA. // chr1 // 100 // 100 // 0 // --- // 0 /// ENST00000302101 // ENSEMBL // nescient helix loop helix 1 [gene_biotype:protein_coding transcript_biotype:protein_coding] // chr1 // 100 // 100 // 0 // --- // 0 /// BC013789 // GenBank // Homo sapiens nescient helix loop helix 1, mRNA (cDNA clone MGC:17696 IMAGE:3866861), comp…
TC0100010301.hg.1	TC0100010301.hg.1	chr1	+	160400574	160428678	10	main	Multiple_Complex	NM_020335 // RefSeq // Homo sapiens VANGL planar cell polarity protein 2 (VANGL2), mRNA. // chr1 // 100 // 100 // 0 // --- // 0 /// ENST00000368061 // ENSEMBL // VANGL planar cell polarity protein 2 [gene_biotype:protein_coding transcript_biotype:protein_coding] // chr1 // 100 // 100 // 0 // --- // 0 /// ENST00000483408 // ENSEMBL // VANGL planar cell polarity protein 2 [gene_biotype:protein_codi…
TC0100010303.hg.1	TC0100010303.hg.1	chr1	+	160502677	160503004	6	main	NonCoding	hsa_circ_0000144 // circbase // Memczak2013 ANTISENSE, coding, INTERNAL, intronic best transcript NM_052931 // chr1 // 100 // 100 // 0 // --- // 0
TC0100010310.hg.1	TC0100010310.hg.1	chr1	+	160739057	160754821	10	main	Multiple_Complex	NM_001282588 // RefSeq // Homo sapiens SLAM family member 7 (SLAMF7), transcript variant 2, mRNA. // chr1 // 100 // 100 // 0 // --- // 0 /// NM_001282589 // RefSeq // Homo sapiens SLAM family member 7 (SLAMF7), transcript variant 3, mRNA. // chr1 // 100 // 100 // 0 // --- // 0 /// NM_001282590 // RefSeq // Homo sapiens SLAM family member 7 (SLAMF7), transcript variant 4, mRNA. // chr1 // 100 // 1…
TC0100010314.hg.1	TC0100010314.hg.1	chr1	+	160796074	160828261	10	main	Multiple_Complex	NM_001033667 // RefSeq // Homo sapiens lymphocyte antigen 9 (LY9), transcript variant 2, mRNA. // chr1 // 100 // 100 // 0 // --- // 0 /// NM_001261456 // RefSeq // Homo sapiens lymphocyte antigen 9 (LY9), transcript variant 3, mRNA. // chr1 // 100 // 100 // 0 // --- // 0 /// NM_001261457 // RefSeq // Homo sapiens lymphocyte antigen 9 (LY9), transcript variant 4, mRNA. // chr1 // 100 // 100 // 0 /…
TC0100010331.hg.1	TC0100010331.hg.1	chr1	+	161098361	161100348	10	main	Multiple_Complex	NM_001007255 // RefSeq // Homo sapiens kelch domain containing 9 (KLHDC9), transcript variant 2, mRNA. // chr1 // 100 // 100 // 0 // --- // 0 /// NM_152366 // RefSeq // Homo sapiens kelch domain containing 9 (KLHDC9), transcript variant 1, mRNA. // chr1 // 100 // 100 // 0 // --- // 0 /// NR_033385 // RefSeq // Homo sapiens kelch domain containing 9 (KLHDC9), transcript variant 3, non-coding RNA. …
TC0100010332.hg.1	TC0100010332.hg.1	chr1	+	161118072	161125445	10	main	Multiple_Complex	NM_001185092 // RefSeq // Homo sapiens nitrilase 1 (NIT1), transcript variant 2, mRNA. // chr1 // 100 // 100 // 0 // --- // 0 /// NM_001185093 // RefSeq // Homo sapiens nitrilase 1 (NIT1), transcript variant 3, mRNA. // chr1 // 100 // 100 // 0 // --- // 0 /// NM_001185094 // RefSeq // Homo sapiens nitrilase 1 (NIT1), transcript variant 4, mRNA. // chr1 // 100 // 100 // 0 // --- // 0 /// NM_005600…
TC0100010334.hg.1	TC0100010334.hg.1	chr1	+	161152776	161158856	10	main	Multiple_Complex	NM_016406 // RefSeq // Homo sapiens ubiquitin-fold modifier conjugating enzyme 1 (UFC1), mRNA. // chr1 // 100 // 100 // 0 // --- // 0 /// ENST00000368003 // ENSEMBL // ubiquitin-fold modifier conjugating enzyme 1 [gene_biotype:protein_coding transcript_biotype:protein_coding] // chr1 // 100 // 100 // 0 // --- // 0 /// ENST00000463735 // ENSEMBL // ubiquitin-fold modifier conjugating enzyme 1 [gen…
TC0100010335.hg.1	TC0100010335.hg.1	chr1	+	161159450	161165726	10	main	Multiple_Complex	NM_001014443 // RefSeq // Homo sapiens ubiquitin specific peptidase 21 (USP21), transcript variant 3, mRNA. // chr1 // 100 // 100 // 0 // --- // 0 /// NM_012475 // RefSeq // Homo sapiens ubiquitin specific peptidase 21 (USP21), transcript variant 1, mRNA. // chr1 // 100 // 100 // 0 // --- // 0 /// ENST00000289865 // ENSEMBL // ubiquitin specific peptidase 21 [gene_biotype:protein_coding transcrip…
TC0100010336.hg.1	TC0100010336.hg.1	chr1	+	161166391	161178013	10	main	Multiple_Complex	NM_000309 // RefSeq // Homo sapiens protoporphyrinogen oxidase (PPOX), transcript variant 1, mRNA. // chr1 // 100 // 100 // 0 // --- // 0 /// NM_001122764 // RefSeq // Homo sapiens protoporphyrinogen oxidase (PPOX), transcript variant 2, mRNA. // chr1 // 100 // 100 // 0 // --- // 0 /// ENST00000352210 // ENSEMBL // protoporphyrinogen oxidase [gene_biotype:protein_coding transcript_biotype:protein…
TC0100010340.hg.1	TC0100010340.hg.1	chr1	+	161197104	161214395	10	main	Multiple_Complex	NM_001166159 // RefSeq // Homo sapiens NADH dehydrogenase (ubiquinone) Fe-S protein 2, 49kDa (NADH-coenzyme Q reductase) (NDUFS2), transcript variant 2, mRNA. // chr1 // 100 // 100 // 0 // --- // 0 /// NM_004550 // RefSeq // Homo sapiens NADH dehydrogenase (ubiquinone) Fe-S protein 2, 49kDa (NADH-coenzyme Q reductase) (NDUFS2), transcript variant 1, mRNA. // chr1 // 100 // 100 // 0 // --- // 0 //…
TC0100010341.hg.1	TC0100010341.hg.1	chr1	+	161215234	161220699	10	main	Multiple_Complex	NM_004106 // RefSeq // Homo sapiens Fc fragment of IgE, high affinity I, receptor for; gamma polypeptide (FCER1G), mRNA. // chr1 // 100 // 100 // 0 // --- // 0 /// ENST00000289902 // ENSEMBL // Fc fragment of IgE, high affinity I, receptor for; gamma polypeptide [gene_biotype:protein_coding transcript_biotype:protein_coding] // chr1 // 100 // 100 // 0 // --- // 0 /// ENST00000367992 // ENSEMBL //…
TC0100010343.hg.1	TC0100010343.hg.1	chr1	+	161225939	161230746	10	main	Multiple_Complex	NM_001286373 // RefSeq // Homo sapiens translocase of outer mitochondrial membrane 40 homolog (yeast)-like (TOMM40L), transcript variant 2, mRNA. // chr1 // 100 // 100 // 0 // --- // 0 /// NM_001286374 // RefSeq // Homo sapiens translocase of outer mitochondrial membrane 40 homolog (yeast)-like (TOMM40L), transcript variant 3, mRNA. // chr1 // 100 // 100 // 0 // --- // 0 /// NM_032174 // RefSeq /…
TC0100010345.hg.1	TC0100010345.hg.1	chr1	+	161258727	161285450	10	main	Coding	NM_001102566 // RefSeq // Homo sapiens Purkinje cell protein 4 like 1 (PCP4L1), mRNA. // chr1 // 100 // 100 // 0 // --- // 0 /// ENST00000504449 // ENSEMBL // Purkinje cell protein 4 like 1 [gene_biotype:protein_coding transcript_biotype:protein_coding] // chr1 // 100 // 100 // 0 // --- // 0 /// BC147003 // GenBank // Homo sapiens Purkinje cell protein 4 like 1, mRNA (cDNA clone MGC:182106 IMAGE:…
TC0100010347.hg.1	TC0100010347.hg.1	chr1	+	161314257	161375340	10	main	Multiple_Complex	NM_001035511 // RefSeq // Homo sapiens succinate dehydrogenase complex, subunit C, integral membrane protein, 15kDa (SDHC), transcript variant 2, mRNA. // chr1 // 100 // 100 // 0 // --- // 0 /// NM_001035512 // RefSeq // Homo sapiens succinate dehydrogenase complex, subunit C, integral membrane protein, 15kDa (SDHC), transcript variant 3, mRNA. // chr1 // 100 // 100 // 0 // --- // 0 /// NM_001035…
TC0100010360.hg.1	TC0100010360.hg.1	chr1	+	161524540	161527283	10	main	Multiple_Complex	NM_002155 // RefSeq // Homo sapiens heat shock 70kDa protein 6 (HSP70B) (HSPA6), mRNA. // chr1 // 100 // 100 // 0 // --- // 0 /// ENST00000309758 // ENSEMBL // heat shock 70kDa protein 6 (HSP70B') [gene_biotype:protein_coding transcript_biotype:protein_coding] // chr1 // 100 // 100 // 0 // --- // 0 /// BC035665 // GenBank // Homo sapiens heat shock 70kDa protein 6 (HSP70B), mRNA (cDNA clone MGC:4…
TC0100010365.hg.1	TC0100010365.hg.1	chr1	+	161706972	161714352	10	main	Multiple_Complex	NM_001184866 // RefSeq // Homo sapiens Fc receptor-like A (FCRLA), transcript variant 1, mRNA. // chr1 // 100 // 100 // 0 // --- // 0 /// NM_001184867 // RefSeq // Homo sapiens Fc receptor-like A (FCRLA), transcript variant 3, mRNA. // chr1 // 100 // 100 // 0 // --- // 0 /// NM_001184870 // RefSeq // Homo sapiens Fc receptor-like A (FCRLA), transcript variant 4, mRNA. // chr1 // 100 // 100 // 0 /…
TC0100010366.hg.1	TC0100010366.hg.1	chr1	+	161721544	161728143	10	main	Multiple_Complex	NM_001002901 // RefSeq // Homo sapiens Fc receptor-like B (FCRLB), transcript variant 1, mRNA. // chr1 // 100 // 100 // 0 // --- // 0 /// NM_001288829 // RefSeq // Homo sapiens Fc receptor-like B (FCRLB), transcript variant 2, mRNA. // chr1 // 100 // 100 // 0 // --- // 0 /// NM_001288830 // RefSeq // Homo sapiens Fc receptor-like B (FCRLB), transcript variant 3, mRNA. // chr1 // 100 // 100 // 0 /…
TC0100010368.hg.1	TC0100010368.hg.1	chr1	+	161749758	161757238	10	main	Multiple_Complex	NM_007240 // RefSeq // Homo sapiens dual specificity phosphatase 12 (DUSP12), mRNA. // chr1 // 100 // 100 // 0 // --- // 0 /// ENST00000367943 // ENSEMBL // dual specificity phosphatase 12 [gene_biotype:protein_coding transcript_biotype:protein_coding] // chr1 // 100 // 100 // 0 // --- // 0 /// ENST00000463365 // ENSEMBL // dual specificity phosphatase 12 [gene_biotype:protein_coding transcript_b…
TC0100010369.hg.1	TC0100010369.hg.1	chr1	+	161766244	161964070	10	main	Multiple_Complex	NM_007348 // RefSeq // Homo sapiens activating transcription factor 6 (ATF6), mRNA. // chr1 // 100 // 100 // 0 // --- // 0 /// ENST00000367942 // ENSEMBL // activating transcription factor 6 [gene_biotype:protein_coding transcript_biotype:protein_coding] // chr1 // 100 // 100 // 0 // --- // 0 /// ENST00000476437 // ENSEMBL // activating transcription factor 6 [gene_biotype:protein_coding transcri…
TC0100010379.hg.1	TC0100010379.hg.1	chr1	+	162497174	162529629	10	main	Multiple_Complex	NM_001184763 // RefSeq // Homo sapiens U2AF homology motif (UHM) kinase 1 (UHMK1), transcript variant 2, mRNA. // chr1 // 100 // 100 // 0 // --- // 0 /// NM_144624 // RefSeq // Homo sapiens U2AF homology motif (UHM) kinase 1 (UHMK1), transcript variant 3, mRNA. // chr1 // 100 // 100 // 0 // --- // 0 /// NM_175866 // RefSeq // Homo sapiens U2AF homology motif (UHM) kinase 1 (UHMK1), transcript var…
TC0100010381.hg.1	TC0100010381.hg.1	chr1	+	162561506	162600903	10	main	Multiple_Complex	NM_003115 // RefSeq // Homo sapiens UDP-N-acetylglucosamine pyrophosphorylase 1 (UAP1), mRNA. // chr1 // 100 // 100 // 0 // --- // 0 /// ENST00000271469 // ENSEMBL // UDP-N-acetylglucosamine pyrophosphorylase 1 [gene_biotype:protein_coding transcript_biotype:protein_coding] // chr1 // 100 // 100 // 0 // --- // 0 /// ENST00000367924 // ENSEMBL // UDP-N-acetylglucosamine pyrophosphorylase 1 [gene_b…
TC0100010387.hg.1	TC0100010387.hg.1	chr1	+	162631373	162787400	10	main	Multiple_Complex	NM_001014796 // RefSeq // Homo sapiens discoidin domain receptor tyrosine kinase 2 (DDR2), transcript variant 1, mRNA. // chr1 // 100 // 100 // 0 // --- // 0 /// NM_006182 // RefSeq // Homo sapiens discoidin domain receptor tyrosine kinase 2 (DDR2), transcript variant 2, mRNA. // chr1 // 100 // 100 // 0 // --- // 0 /// ENST00000367921 // ENSEMBL // discoidin domain receptor tyrosine kinase 2 [gen…
TC0100010389.hg.1	TC0100010389.hg.1	chr1	+	162790702	162812818	10	main	Multiple_Complex	NM_001304512 // RefSeq // Homo sapiens hydroxysteroid (17-beta) dehydrogenase 7 (HSD17B7), transcript variant 2, mRNA. // chr1 // 100 // 100 // 0 // --- // 0 /// NM_001304513 // RefSeq // Homo sapiens hydroxysteroid (17-beta) dehydrogenase 7 (HSD17B7), transcript variant 3, mRNA. // chr1 // 100 // 100 // 0 // --- // 0 /// NM_016371 // RefSeq // Homo sapiens hydroxysteroid (17-beta) dehydrogenase …
TC0100010393.hg.1	TC0100010393.hg.1	chr1	+	163068606	163076802	10	main	Multiple_Complex	NM_001102445 // RefSeq // Homo sapiens regulator of G-protein signaling 4 (RGS4), transcript variant 1, mRNA. // chr1 // 100 // 100 // 0 // --- // 0 /// NM_001113380 // RefSeq // Homo sapiens regulator of G-protein signaling 4 (RGS4), transcript variant 3, mRNA. // chr1 // 100 // 100 // 0 // --- // 0 /// NM_001113381 // RefSeq // Homo sapiens regulator of G-protein signaling 4 (RGS4), transcript …
TC0100010397.hg.1	TC0100010397.hg.1	chr1	+	163266576	163355764	10	main	Multiple_Complex	NM_031423 // RefSeq // Homo sapiens NUF2, NDC80 kinetochore complex component (NUF2), transcript variant 2, mRNA. // chr1 // 100 // 100 // 0 // --- // 0 /// NM_145697 // RefSeq // Homo sapiens NUF2, NDC80 kinetochore complex component (NUF2), transcript variant 1, mRNA. // chr1 // 100 // 100 // 0 // --- // 0 /// ENST00000271452 // ENSEMBL // NUF2, NDC80 kinetochore complex component [gene_biotype…
TC0100010416.hg.1	TC0100010416.hg.1	chr1	+	164555584	164851831	10	main	Multiple_Complex	NM_001204961 // RefSeq // Homo sapiens pre-B-cell leukemia homeobox 1 (PBX1), transcript variant 2, mRNA. // chr1 // 100 // 100 // 0 // --- // 0 /// NM_001204963 // RefSeq // Homo sapiens pre-B-cell leukemia homeobox 1 (PBX1), transcript variant 3, mRNA. // chr1 // 100 // 100 // 0 // --- // 0 /// NM_002585 // RefSeq // Homo sapiens pre-B-cell leukemia homeobox 1 (PBX1), transcript variant 1, mRNA…
TC0100010430.hg.1	TC0100010430.hg.1	chr1	+	164651896	164899296	10	main	NonCoding	ENST00000558796 // ENSEMBL // pre-B-cell leukemia homeobox 1 [gene_biotype:protein_coding transcript_biotype:processed_transcript] // chr1 // 100 // 100 // 0 // --- // 0 /// OTTHUMT00000417694 // Havana transcript // pre-B-cell leukemia homeobox 1[gene_biotype:protein_coding transcript_biotype:processed_transcript] // chr1 // 100 // 100 // 0 // --- // 0 /// uc057mxm.1 // UCSC Genes // pre-B-cell …
TC0100010451.hg.1	TC0100010451.hg.1	chr1	+	165544007	165563961	10	main	Coding	NM_001005214 // RefSeq // Homo sapiens leucine rich repeat containing 52 (LRRC52), mRNA. // chr1 // 100 // 100 // 0 // --- // 0 /// ENST00000294818 // ENSEMBL // leucine rich repeat containing 52 [gene_biotype:protein_coding transcript_biotype:protein_coding] // chr1 // 100 // 100 // 0 // --- // 0 /// BC132981 // GenBank // Homo sapiens leucine rich repeat containing 52, mRNA (cDNA clone MGC:1646…
TC0100010454.hg.1	TC0100010454.hg.1	chr1	+	165630861	165661796	10	main	Multiple_Complex	NM_004528 // RefSeq // Homo sapiens microsomal glutathione S-transferase 3 (MGST3), mRNA. // chr1 // 100 // 100 // 0 // --- // 0 /// ENST00000367883 // ENSEMBL // microsomal glutathione S-transferase 3 [gene_biotype:protein_coding transcript_biotype:protein_coding] // chr1 // 100 // 100 // 0 // --- // 0 /// ENST00000367884 // ENSEMBL // microsomal glutathione S-transferase 3 [gene_biotype:protein…
TC0100010457.hg.1	TC0100010457.hg.1	chr1	+	165645661	165648670	10	main	NonCoding	ENST00000461759 // ENSEMBL // microsomal glutathione S-transferase 3 [gene_biotype:protein_coding transcript_biotype:processed_transcript] // chr1 // 100 // 100 // 0 // --- // 0 /// OTTHUMT00000083784 // Havana transcript // microsomal glutathione S-transferase 3[gene_biotype:protein_coding transcript_biotype:processed_transcript] // chr1 // 100 // 100 // 0 // --- // 0 /// uc057myr.1 // UCSC Gene…
TC0100010467.hg.1	TC0100010467.hg.1	chr1	+	165885141	165886708	6	main	NonCoding	hsa_circ_0007260 // circbase // Jeck2013 ALT_ACCEPTOR, ALT_DONOR, coding, INTERNAL, intronic best transcript NM_012474 // chr1 // 100 // 100 // 0 // --- // 0 /// chr1_165854378_165854616 // Guo // circRNA transcript identified by Guo, et al. on chr1 from 165854378-165854616 on Hg19 // chr1 // 100 // 100 // 0 // --- // 0 /// chr1_165854378_165855945 // Guo // circRNA transcript identified by Guo, …
TC0100010486.hg.1	TC0100010486.hg.1	chr1	+	166839447	166856344	10	main	Coding	NM_017542 // RefSeq // Homo sapiens pogo transposable element with KRAB domain (POGK), transcript variant 1, mRNA. // chr1 // 100 // 100 // 0 // --- // 0 /// ENST00000367875 // ENSEMBL // pogo transposable element with KRAB domain [gene_biotype:protein_coding transcript_biotype:protein_coding] // chr1 // 100 // 100 // 0 // --- // 0 /// ENST00000367876 // ENSEMBL // pogo transposable element with …
TC0100010492.hg.1	TC0100010492.hg.1	chr1	+	166975582	167022214	10	main	Multiple_Complex	NM_001286377 // RefSeq // Homo sapiens maelstrom spermatogenic transposon silencer (MAEL), transcript variant 2, mRNA. // chr1 // 100 // 100 // 0 // --- // 0 /// NM_001286378 // RefSeq // Homo sapiens maelstrom spermatogenic transposon silencer (MAEL), transcript variant 3, mRNA. // chr1 // 100 // 100 // 0 // --- // 0 /// NM_032858 // RefSeq // Homo sapiens maelstrom spermatogenic transposon sile…
TC0100010497.hg.1	TC0100010497.hg.1	chr1	+	167094045	167129165	10	main	Multiple_Complex	NM_001080426 // RefSeq // Homo sapiens dual specificity phosphatase 27 (putative) (DUSP27), mRNA. // chr1 // 100 // 100 // 0 // --- // 0 /// ENST00000271385 // ENSEMBL // dual specificity phosphatase 27 (putative) [gene_biotype:protein_coding transcript_biotype:protein_coding] // chr1 // 100 // 100 // 0 // --- // 0 /// ENST00000361200 // ENSEMBL // dual specificity phosphatase 27 (putative) [gene…
TC0100010499.hg.1	TC0100010499.hg.1	chr1	+	167220829	167427345	10	main	Multiple_Complex	NM_001198783 // RefSeq // Homo sapiens POU class 2 homeobox 1 (POU2F1), transcript variant 2, mRNA. // chr1 // 100 // 100 // 0 // --- // 0 /// NM_001198786 // RefSeq // Homo sapiens POU class 2 homeobox 1 (POU2F1), transcript variant 3, mRNA. // chr1 // 100 // 100 // 0 // --- // 0 /// NM_002697 // RefSeq // Homo sapiens POU class 2 homeobox 1 (POU2F1), transcript variant 1, mRNA. // chr1 // 100 /…
TC0100010510.hg.1	TC0100010510.hg.1	chr1	+	167627385	167706249	10	main	Multiple_Complex	NM_052862 // RefSeq // Homo sapiens RCSD domain containing 1 (RCSD1), mRNA. // chr1 // 100 // 100 // 0 // --- // 0 /// ENST00000361496 // ENSEMBL // RCSD domain containing 1 [gene_biotype:protein_coding transcript_biotype:protein_coding] // chr1 // 100 // 100 // 0 // --- // 0 /// ENST00000367854 // ENSEMBL // RCSD domain containing 1 [gene_biotype:protein_coding transcript_biotype:protein_coding]…
TC0100010514.hg.1	TC0100010514.hg.1	chr1	+	167721192	167791919	10	main	Multiple_Complex	NM_001146191 // RefSeq // Homo sapiens myelin protein zero-like 1 (MPZL1), transcript variant 3, mRNA. // chr1 // 100 // 100 // 0 // --- // 0 /// NM_003953 // RefSeq // Homo sapiens myelin protein zero-like 1 (MPZL1), transcript variant 1, mRNA. // chr1 // 100 // 100 // 0 // --- // 0 /// NM_024569 // RefSeq // Homo sapiens myelin protein zero-like 1 (MPZL1), transcript variant 2, mRNA. // chr1 //…
TC0100010518.hg.1	TC0100010518.hg.1	chr1	+	167935783	168075845	10	main	Multiple_Complex	NM_001017977 // RefSeq // Homo sapiens DDB1 and CUL4 associated factor 6 (DCAF6), transcript variant 2, mRNA. // chr1 // 100 // 100 // 0 // --- // 0 /// NM_001198956 // RefSeq // Homo sapiens DDB1 and CUL4 associated factor 6 (DCAF6), transcript variant 3, mRNA. // chr1 // 100 // 100 // 0 // --- // 0 /// NM_001198957 // RefSeq // Homo sapiens DDB1 and CUL4 associated factor 6 (DCAF6), transcript …
TC0100010522.hg.1	TC0100010522.hg.1	chr1	+	168178845	168202114	10	main	Multiple_Complex	NM_001031800 // RefSeq // Homo sapiens TOR signaling pathway regulator (TIPRL), transcript variant 2, mRNA. // chr1 // 100 // 100 // 0 // --- // 0 /// NM_152902 // RefSeq // Homo sapiens TOR signaling pathway regulator (TIPRL), transcript variant 1, mRNA. // chr1 // 100 // 100 // 0 // --- // 0 /// ENST00000367830 // ENSEMBL // TOR signaling pathway regulator [gene_biotype:protein_coding transcrip…
TC0100010525.hg.1	TC0100010525.hg.1	chr1	+	168225938	168253025	10	main	Multiple_Complex	NM_199344 // RefSeq // Homo sapiens SFT2 domain containing 2 (SFT2D2), mRNA. // chr1 // 100 // 100 // 0 // --- // 0 /// ENST00000271375 // ENSEMBL // SFT2 domain containing 2 [gene_biotype:protein_coding transcript_biotype:protein_coding] // chr1 // 100 // 100 // 0 // --- // 0 /// ENST00000367829 // ENSEMBL // SFT2 domain containing 2 [gene_biotype:protein_coding transcript_biotype:protein_coding…
TC0100010526.hg.1	TC0100010526.hg.1	chr1	+	168281040	168314428	10	main	Multiple_Complex	NM_005149 // RefSeq // Homo sapiens T-box 19 (TBX19), mRNA. // chr1 // 100 // 100 // 0 // --- // 0 /// ENST00000367821 // ENSEMBL // T-box 19 [gene_biotype:protein_coding transcript_biotype:protein_coding] // chr1 // 100 // 100 // 0 // --- // 0 /// ENST00000431969 // ENSEMBL // T-box 19 [gene_biotype:protein_coding transcript_biotype:protein_coding] // chr1 // 100 // 100 // 0 // --- // 0 /// ENST…
TC0100010532.hg.1	TC0100010532.hg.1	chr1	+	168576473	168582077	10	main	Coding	NM_002995 // RefSeq // Homo sapiens chemokine (C motif) ligand 1 (XCL1), mRNA. // chr1 // 100 // 100 // 0 // --- // 0 /// ENST00000367818 // ENSEMBL // chemokine (C motif) ligand 1 [gene_biotype:protein_coding transcript_biotype:protein_coding] // chr1 // 100 // 100 // 0 // --- // 0 /// BC069817 // GenBank // Homo sapiens chemokine (C motif) ligand 1, mRNA (cDNA clone MGC:97432 IMAGE:7262708), co…
TC0100010543.hg.1	TC0100010543.hg.1	chr1	+	169105697	169132722	10	main	Multiple_Complex	NM_001677 // RefSeq // Homo sapiens ATPase, Na+/K+ transporting, beta 1 polypeptide (ATP1B1), mRNA. // chr1 // 100 // 100 // 0 // --- // 0 /// ENST00000367815 // ENSEMBL // ATPase, Na+/K+ transporting, beta 1 polypeptide [gene_biotype:protein_coding transcript_biotype:protein_coding] // chr1 // 100 // 100 // 0 // --- // 0 /// ENST00000367816 // ENSEMBL // ATPase, Na+/K+ transporting, beta 1 polyp…
TC0100010546.hg.1	TC0100010546.hg.1	chr1	+	169367956	169396542	10	main	Multiple_Complex	NM_003666 // RefSeq // Homo sapiens basic leucine zipper nuclear factor 1 (BLZF1), mRNA. // chr1 // 100 // 100 // 0 // --- // 0 /// ENST00000329281 // ENSEMBL // basic leucine zipper nuclear factor 1 [gene_biotype:protein_coding transcript_biotype:protein_coding] // chr1 // 100 // 100 // 0 // --- // 0 /// ENST00000367807 // ENSEMBL // basic leucine zipper nuclear factor 1 [gene_biotype:protein_co…
TC0100010553.hg.1	TC0100010553.hg.1	chr1	+	169662007	169854080	10	main	Multiple_Complex	NM_018186 // RefSeq // Homo sapiens chromosome 1 open reading frame 112 (C1orf112), mRNA. // chr1 // 100 // 100 // 0 // --- // 0 /// ENST00000286031 // ENSEMBL // chromosome 1 open reading frame 112 [gene_biotype:protein_coding transcript_biotype:protein_coding] // chr1 // 100 // 100 // 0 // --- // 0 /// ENST00000359326 // ENSEMBL // chromosome 1 open reading frame 112 [gene_biotype:protein_codin…
TC0100010559.hg.1	TC0100010559.hg.1	chr1	+	170146001	170167790	10	main	Multiple_Complex	NM_001136107 // RefSeq // Homo sapiens methyltransferase like 11B (METTL11B), mRNA. // chr1 // 100 // 100 // 0 // --- // 0 /// ENST00000367764 // ENSEMBL // methyltransferase like 11B [gene_biotype:protein_coding transcript_biotype:processed_transcript] // chr1 // 100 // 100 // 0 // --- // 0 /// ENST00000439373 // ENSEMBL // methyltransferase like 11B [gene_biotype:protein_coding transcript_bioty…
TC0100010565.hg.1	TC0100010565.hg.1	chr1	+	170532122	170553833	10	main	Multiple_Complex	NM_001146039 // RefSeq // Homo sapiens golgin, RAB6-interacting (GORAB), transcript variant 3, mRNA. // chr1 // 100 // 100 // 0 // --- // 0 /// NM_152281 // RefSeq // Homo sapiens golgin, RAB6-interacting (GORAB), transcript variant 1, mRNA. // chr1 // 100 // 100 // 0 // --- // 0 /// NR_027397 // RefSeq // Homo sapiens golgin, RAB6-interacting (GORAB), transcript variant 2, non-coding RNA. // chr…
TC0100010571.hg.1	TC0100010571.hg.1	chr1	+	170662728	170739419	10	main	Multiple_Complex	NM_006902 // RefSeq // Homo sapiens paired related homeobox 1 (PRRX1), transcript variant pmx-1a, mRNA. // chr1 // 100 // 100 // 0 // --- // 0 /// NM_022716 // RefSeq // Homo sapiens paired related homeobox 1 (PRRX1), transcript variant pmx-1b, mRNA. // chr1 // 100 // 100 // 0 // --- // 0 /// ENST00000239461 // ENSEMBL // paired related homeobox 1 [gene_biotype:protein_coding transcript_biotype:p…
TC0100010577.hg.1	TC0100010577.hg.1	chr1	+	170935471	171064765	10	main	Coding	NM_001163629 // RefSeq // Homo sapiens maestro heat-like repeat family member 9 (MROH9), transcript variant 1, mRNA. // chr1 // 100 // 100 // 0 // --- // 0 /// NM_025063 // RefSeq // Homo sapiens maestro heat-like repeat family member 9 (MROH9), transcript variant 2, mRNA. // chr1 // 100 // 100 // 0 // --- // 0 /// ENST00000367758 // ENSEMBL // maestro heat-like repeat family member 9 [gene_bioty…
TC0100010579.hg.1	TC0100010579.hg.1	chr1	+	171090877	171117819	10	main	Multiple_Complex	NM_001002294 // RefSeq // Homo sapiens flavin containing monooxygenase 3 (FMO3), transcript variant 2, mRNA. // chr1 // 100 // 100 // 0 // --- // 0 /// NM_006894 // RefSeq // Homo sapiens flavin containing monooxygenase 3 (FMO3), transcript variant 1, mRNA. // chr1 // 100 // 100 // 0 // --- // 0 /// ENST00000367755 // ENSEMBL // flavin containing monooxygenase 3 [gene_biotype:protein_coding trans…
TC0100010581.hg.1	TC0100010581.hg.1	chr1	+	171137740	171161568	10	main	Multiple_Complex	NR_002601 // RefSeq // Homo sapiens flavin containing monooxygenase 6 pseudogene (FMO6P), non-coding RNA. // chr1 // 100 // 100 // 0 // --- // 0 /// ENST00000236166 // ENSEMBL // flavin containing monooxygenase 6 pseudogene [gene_biotype:unitary_pseudogene transcript_biotype:unitary_pseudogene] // chr1 // 100 // 100 // 0 // --- // 0 /// ENST00000367754 // ENSEMBL // flavin containing monooxygenas…
TC0100010583.hg.1	TC0100010583.hg.1	chr1	+	171185208	171212683	10	main	Multiple_Complex	NM_001301347 // RefSeq // Homo sapiens flavin containing monooxygenase 2 (non-functional) (FMO2), transcript variant 3, mRNA. // chr1 // 100 // 100 // 0 // --- // 0 /// NM_001460 // RefSeq // Homo sapiens flavin containing monooxygenase 2 (non-functional) (FMO2), transcript variant 1, mRNA. // chr1 // 100 // 100 // 0 // --- // 0 /// ENST00000209929 // ENSEMBL // flavin containing monooxygenase 2 …
TC0100010584.hg.1	TC0100010584.hg.1	chr1	+	171248471	171285978	10	main	Multiple_Complex	NM_001282692 // RefSeq // Homo sapiens flavin containing monooxygenase 1 (FMO1), transcript variant 1, mRNA. // chr1 // 100 // 100 // 0 // --- // 0 /// NM_001282693 // RefSeq // Homo sapiens flavin containing monooxygenase 1 (FMO1), transcript variant 3, mRNA. // chr1 // 100 // 100 // 0 // --- // 0 /// NM_001282694 // RefSeq // Homo sapiens flavin containing monooxygenase 1 (FMO1), transcript var…
TC0100010585.hg.1	TC0100010585.hg.1	chr1	+	171272870	171273417	6	main	Unassigned	FMO1.kAug10-unspliced // Ace View // Transcript Identified by AceView, Entrez Gene ID(s) 2326 // chr1 // 100 // 100 // 0 // --- // 0
TC0100010586.hg.1	TC0100010586.hg.1	chr1	+	171314183	171342084	10	main	Multiple_Complex	NM_002022 // RefSeq // Homo sapiens flavin containing monooxygenase 4 (FMO4), mRNA. // chr1 // 100 // 100 // 0 // --- // 0 /// ENST00000367749 // ENSEMBL // flavin containing monooxygenase 4 [gene_biotype:protein_coding transcript_biotype:protein_coding] // chr1 // 100 // 100 // 0 // --- // 0 /// ENST00000462992 // ENSEMBL // flavin containing monooxygenase 4 [gene_biotype:protein_coding transcri…
TC0100010592.hg.1	TC0100010592.hg.1	chr1	+	171485527	171593511	10	main	Multiple_Complex	NM_015172 // RefSeq // Homo sapiens proline-rich coiled-coil 2C (PRRC2C), mRNA. // chr1 // 100 // 100 // 0 // --- // 0 /// ENST00000338920 // ENSEMBL // proline-rich coiled-coil 2C [gene_biotype:protein_coding transcript_biotype:protein_coding] // chr1 // 100 // 100 // 0 // --- // 0 /// ENST00000367742 // ENSEMBL // proline-rich coiled-coil 2C [gene_biotype:protein_coding transcript_biotype:prote…
TC0100010606.hg.1	TC0100010606.hg.1	chr1	+	171781621	171814023	10	main	Multiple_Complex	NM_001007239 // RefSeq // Homo sapiens methyltransferase like 13 (METTL13), transcript variant 3, mRNA. // chr1 // 100 // 100 // 0 // --- // 0 /// NM_014955 // RefSeq // Homo sapiens methyltransferase like 13 (METTL13), transcript variant 2, mRNA. // chr1 // 100 // 100 // 0 // --- // 0 /// NM_015935 // RefSeq // Homo sapiens methyltransferase like 13 (METTL13), transcript variant 1, mRNA. // chr1…
TC0100010609.hg.1	TC0100010609.hg.1	chr1	+	171841478	172418466	10	main	Multiple_Complex	NM_001136127 // RefSeq // Homo sapiens dynamin 3 (DNM3), transcript variant 2, mRNA. // chr1 // 100 // 100 // 0 // --- // 0 /// NM_001278252 // RefSeq // Homo sapiens dynamin 3 (DNM3), transcript variant 3, mRNA. // chr1 // 100 // 100 // 0 // --- // 0 /// NM_015569 // RefSeq // Homo sapiens dynamin 3 (DNM3), transcript variant 1, mRNA. // chr1 // 100 // 100 // 0 // --- // 0 /// ENST00000355305 //…
TC0100010621.hg.1	TC0100010621.hg.1	chr1	+	172420688	172468831	10	main	Multiple_Complex	NM_001300760 // RefSeq // Homo sapiens chromosome 1 open reading frame 105 (C1orf105), transcript variant 2, mRNA. // chr1 // 100 // 100 // 0 // --- // 0 /// NM_139240 // RefSeq // Homo sapiens chromosome 1 open reading frame 105 (C1orf105), transcript variant 1, mRNA. // chr1 // 100 // 100 // 0 // --- // 0 /// ENST00000367725 // ENSEMBL // chromosome 1 open reading frame 105 [gene_biotype:protei…
TC0100010623.hg.1	TC0100010623.hg.1	chr1	+	172532349	172611833	10	main	Multiple_Complex	NM_001282750 // RefSeq // Homo sapiens SUN domain containing ossification factor (SUCO), transcript variant 3, mRNA. // chr1 // 100 // 100 // 0 // --- // 0 /// NM_001282751 // RefSeq // Homo sapiens SUN domain containing ossification factor (SUCO), transcript variant 4, mRNA. // chr1 // 100 // 100 // 0 // --- // 0 /// NM_014283 // RefSeq // Homo sapiens SUN domain containing ossification factor (…
TC0100010625.hg.1	TC0100010625.hg.1	chr1	+	172659008	172666874	10	main	Coding	NM_000639 // RefSeq // Homo sapiens Fas ligand (TNF superfamily, member 6) (FASLG), transcript variant 1, mRNA. // chr1 // 100 // 100 // 0 // --- // 0 /// NM_001302746 // RefSeq // Homo sapiens Fas ligand (TNF superfamily, member 6) (FASLG), transcript variant 2, mRNA. // chr1 // 100 // 100 // 0 // --- // 0 /// ENST00000340030 // ENSEMBL // Fas ligand (TNF superfamily, member 6) [gene_biotype:pro…
TC0100010648.hg.1	TC0100010648.hg.1	chr1	+	173477266	173488815	10	main	Multiple_Complex	NM_004905 // RefSeq // Homo sapiens peroxiredoxin 6 (PRDX6), mRNA. // chr1 // 100 // 100 // 0 // --- // 0 /// ENST00000340385 // ENSEMBL // peroxiredoxin 6 [gene_biotype:protein_coding transcript_biotype:protein_coding] // chr1 // 100 // 100 // 0 // --- // 0 /// ENST00000460950 // ENSEMBL // peroxiredoxin 6 [gene_biotype:protein_coding transcript_biotype:processed_transcript] // chr1 // 100 // 10…
TC0100010651.hg.1	TC0100010651.hg.1	chr1	+	173627068	173637191	10	main	Multiple_Complex	NM_001195190 // RefSeq // Homo sapiens uncharacterized LOC730159 (LOC730159), mRNA. // chr1 // 100 // 100 // 0 // --- // 0 /// ENST00000417563.1 // lncRNAWiki // N/A // chr1 // 100 // 100 // 0 // --- // 0 /// OTTHUMT00000097581 // Havana transcript // putative novel transcript // chr1 // 100 // 100 // 0 // --- // 0 /// uc057njh.1 // UCSC Genes // N/A // chr1 // 100 // 100 // 0 // --- // 0 /// ENS…
TC0100010654.hg.1	TC0100010654.hg.1	chr1	+	173714941	173786703	10	main	Multiple_Complex	NM_014458 // RefSeq // Homo sapiens kelch-like family member 20 (KLHL20), mRNA. // chr1 // 100 // 100 // 0 // --- // 0 /// ENST00000209884 // ENSEMBL // kelch-like family member 20 [gene_biotype:protein_coding transcript_biotype:protein_coding] // chr1 // 100 // 100 // 0 // --- // 0 /// ENST00000479505 // ENSEMBL // kelch-like family member 20 [gene_biotype:protein_coding transcript_biotype:proce…
TC0100010661.hg.1	TC0100010661.hg.1	chr1	+	173824503	173858546	10	main	Multiple_Complex	NM_018122 // RefSeq // Homo sapiens aspartyl-tRNA synthetase 2, mitochondrial (DARS2), mRNA. // chr1 // 100 // 100 // 0 // --- // 0 /// ENST00000361951 // ENSEMBL // aspartyl-tRNA synthetase 2, mitochondrial [gene_biotype:protein_coding transcript_biotype:protein_coding] // chr1 // 100 // 100 // 0 // --- // 0 /// ENST00000460076 // ENSEMBL // aspartyl-tRNA synthetase 2, mitochondrial [gene_biotyp…
TC0100010664.hg.1	TC0100010664.hg.1	chr1	+	173868082	173903549	10	main	Multiple_Complex	NM_001122770 // RefSeq // Homo sapiens zinc finger and BTB domain containing 37 (ZBTB37), transcript variant 1, mRNA. // chr1 // 100 // 100 // 0 // --- // 0 /// NM_032522 // RefSeq // Homo sapiens zinc finger and BTB domain containing 37 (ZBTB37), transcript variant 2, mRNA. // chr1 // 100 // 100 // 0 // --- // 0 /// ENST00000367701 // ENSEMBL // zinc finger and BTB domain containing 37 [gene_bio…
TC0100010672.hg.1	TC0100010672.hg.1	chr1	+	174159410	174995308	10	main	Multiple_Complex	NM_001035230 // RefSeq // Homo sapiens RAB GTPase activating protein 1-like (RABGAP1L), transcript variant 2, mRNA. // chr1 // 100 // 100 // 0 // --- // 0 /// NM_001243763 // RefSeq // Homo sapiens RAB GTPase activating protein 1-like (RABGAP1L), transcript variant 3, mRNA. // chr1 // 100 // 100 // 0 // --- // 0 /// NM_001243764 // RefSeq // Homo sapiens RAB GTPase activating protein 1-like (RABG…
TC0100010674.hg.1	TC0100010674.hg.1	chr1	+	174448074	174449545	10	main	Coding	NM_005684 // RefSeq // Homo sapiens G protein-coupled receptor 52 (GPR52), mRNA. // chr1 // 100 // 100 // 0 // --- // 0 /// ENST00000367685 // ENSEMBL // G protein-coupled receptor 52 [gene_biotype:protein_coding transcript_biotype:protein_coding] // chr1 // 100 // 100 // 0 // --- // 0 /// BC067456 // GenBank // Homo sapiens G protein-coupled receptor 52, mRNA (cDNA clone MGC:79289 IMAGE:6971753)…
TC0100010686.hg.1	TC0100010686.hg.1	chr1	+	174999163	175012027	10	main	Multiple_Complex	NM_001007214 // RefSeq // Homo sapiens calcyclin binding protein (CACYBP), transcript variant 2, mRNA. // chr1 // 100 // 100 // 0 // --- // 0 /// NM_014412 // RefSeq // Homo sapiens calcyclin binding protein (CACYBP), transcript variant 1, mRNA. // chr1 // 100 // 100 // 0 // --- // 0 /// ENST00000367679 // ENSEMBL // calcyclin binding protein [gene_biotype:protein_coding transcript_biotype:protei…
TC0100010689.hg.1	TC0100010689.hg.1	chr1	+	175067858	175148066	10	main	Coding	NM_022093 // RefSeq // Homo sapiens tenascin N (TNN), mRNA. // chr1 // 100 // 100 // 0 // --- // 0 /// ENST00000239462 // ENSEMBL // tenascin N [gene_biotype:protein_coding transcript_biotype:protein_coding] // chr1 // 100 // 100 // 0 // --- // 0 /// ENST00000621086 // ENSEMBL // tenascin N [gene_biotype:protein_coding transcript_biotype:protein_coding] // chr1 // 100 // 100 // 0 // --- // 0 /// …
TC0100010713.hg.1	TC0100010713.hg.1	chr1	+	176463168	176845605	10	main	Multiple_Complex	NM_020318 // RefSeq // Homo sapiens pappalysin 2 (PAPPA2), transcript variant 1, mRNA. // chr1 // 100 // 100 // 0 // --- // 0 /// NM_021936 // RefSeq // Homo sapiens pappalysin 2 (PAPPA2), transcript variant 2, mRNA. // chr1 // 100 // 100 // 0 // --- // 0 /// ENST00000367661 // ENSEMBL // pappalysin 2 [gene_biotype:protein_coding transcript_biotype:protein_coding] // chr1 // 100 // 100 // 0 // --…
TC0100010720.hg.1	TC0100010720.hg.1	chr1	+	177171388	177282422	10	main	Multiple_Complex	NM_021165 // RefSeq // Homo sapiens bone morphogenetic protein/retinoic acid inducible neural-specific 2 (BRINP2), mRNA. // chr1 // 100 // 100 // 0 // --- // 0 /// ENST00000361539 // ENSEMBL // bone morphogenetic protein/retinoic acid inducible neural-specific 2 [gene_biotype:protein_coding transcript_biotype:protein_coding] // chr1 // 100 // 100 // 0 // --- // 0 /// ENST00000460161 // ENSEMBL //…
TC0100010735.hg.1	TC0100010735.hg.1	chr1	+	178093729	178484147	10	main	Multiple_Complex	NM_004841 // RefSeq // Homo sapiens RAS protein activator like 2 (RASAL2), transcript variant 1, mRNA. // chr1 // 100 // 100 // 0 // --- // 0 /// NM_170692 // RefSeq // Homo sapiens RAS protein activator like 2 (RASAL2), transcript variant 2, mRNA. // chr1 // 100 // 100 // 0 // --- // 0 /// ENST00000367649 // ENSEMBL // RAS protein activator like 2 [gene_biotype:protein_coding transcript_biotype:…
TC0100010755.hg.1	TC0100010755.hg.1	chr1	+	178725147	178921842	10	main	Multiple_Complex	NM_001286247 // RefSeq // Homo sapiens Ral GEF with PH domain and SH3 binding motif 2 (RALGPS2), transcript variant 2, mRNA. // chr1 // 100 // 100 // 0 // --- // 0 /// NM_152663 // RefSeq // Homo sapiens Ral GEF with PH domain and SH3 binding motif 2 (RALGPS2), transcript variant 10, mRNA. // chr1 // 100 // 100 // 0 // --- // 0 /// ENST00000324778 // ENSEMBL // Ral GEF with PH domain and SH3 bind…
TC0100010761.hg.1	TC0100010761.hg.1	chr1	+	179025804	179076567	10	main	Multiple_Complex	NM_014864 // RefSeq // Homo sapiens family with sequence similarity 20, member B (FAM20B), mRNA. // chr1 // 100 // 100 // 0 // --- // 0 /// ENST00000263733 // ENSEMBL // family with sequence similarity 20, member B [gene_biotype:protein_coding transcript_biotype:protein_coding] // chr1 // 100 // 100 // 0 // --- // 0 /// ENST00000440702 // ENSEMBL // family with sequence similarity 20, member B [g…
TC0100010764.hg.1	TC0100010764.hg.1	chr1	+	179081377	179098023	10	main	Multiple_Complex	NM_022371 // RefSeq // Homo sapiens torsin family 3, member A (TOR3A), mRNA. // chr1 // 100 // 100 // 0 // --- // 0 /// ENST00000352445 // ENSEMBL // torsin family 3, member A [gene_biotype:protein_coding transcript_biotype:protein_coding] // chr1 // 100 // 100 // 0 // --- // 0 /// ENST00000367625 // ENSEMBL // torsin family 3, member A [gene_biotype:protein_coding transcript_biotype:protein_codi…
TC0100010775.hg.1	TC0100010775.hg.1	chr1	+	179293714	179358680	10	main	Multiple_Complex	NM_001252511 // RefSeq // Homo sapiens sterol O-acyltransferase 1 (SOAT1), transcript variant 2, mRNA. // chr1 // 100 // 100 // 0 // --- // 0 /// NM_001252512 // RefSeq // Homo sapiens sterol O-acyltransferase 1 (SOAT1), transcript variant 3, mRNA. // chr1 // 100 // 100 // 0 // --- // 0 /// NM_003101 // RefSeq // Homo sapiens sterol O-acyltransferase 1 (SOAT1), transcript variant 1, mRNA. // chr1…
TC0100010778.hg.1	TC0100010778.hg.1	chr1	+	179365720	179554735	10	main	Multiple_Complex	NM_144696 // RefSeq // Homo sapiens axonemal dynein light chain domain containing 1 (AXDND1), transcript variant 1, mRNA. // chr1 // 100 // 100 // 0 // --- // 0 /// NR_073544 // RefSeq // Homo sapiens axonemal dynein light chain domain containing 1 (AXDND1), transcript variant 2, non-coding RNA. // chr1 // 100 // 100 // 0 // --- // 0 /// ENST00000367618 // ENSEMBL // axonemal dynein light chain d…
TC0100010784.hg.1	TC0100010784.hg.1	chr1	+	179591613	179691273	10	main	Coding	NM_001199085 // RefSeq // Homo sapiens tudor domain containing 5 (TDRD5), transcript variant 1, mRNA. // chr1 // 100 // 100 // 0 // --- // 0 /// NM_001199089 // RefSeq // Homo sapiens tudor domain containing 5 (TDRD5), transcript variant 2, mRNA. // chr1 // 100 // 100 // 0 // --- // 0 /// NM_001199091 // RefSeq // Homo sapiens tudor domain containing 5 (TDRD5), transcript variant 4, mRNA. // chr1…
TC0100010785.hg.1	TC0100010785.hg.1	chr1	+	179730210	179742709	10	main	NonCoding	ENST00000423879.1 // lncRNAWiki // N/A // chr1 // 100 // 100 // 0 // --- // 0 /// ENST00000451471.1 // lncRNAWiki // N/A // chr1 // 100 // 100 // 0 // --- // 0 /// FAM163A.vbAug10 // Ace View // Transcript Identified by AceView, Entrez Gene ID(s) 148753 // chr1 // 100 // 100 // 0 // --- // 0 /// OTTHUMT00000085298 // Havana transcript // novel transcript // chr1 // 100 // 100 // 0 // --- // 0 ///…
TC0100010786.hg.1	TC0100010786.hg.1	chr1	+	179743163	179816198	10	main	Multiple_Complex	NM_173509 // RefSeq // Homo sapiens family with sequence similarity 163, member A (FAM163A), mRNA. // chr1 // 100 // 100 // 0 // --- // 0 /// ENST00000341785 // ENSEMBL // family with sequence similarity 163, member A [gene_biotype:protein_coding transcript_biotype:protein_coding] // chr1 // 100 // 100 // 0 // --- // 0 /// BC009382 // GenBank // Homo sapiens family with sequence similarity 163, m…
TC0100010791.hg.1	TC0100010791.hg.1	chr1	+	179882042	179925000	10	main	Multiple_Complex	NM_001267578 // RefSeq // Homo sapiens torsin A interacting protein 1 (TOR1AIP1), transcript variant 1, mRNA. // chr1 // 100 // 100 // 0 // --- // 0 /// NM_015602 // RefSeq // Homo sapiens torsin A interacting protein 1 (TOR1AIP1), transcript variant 2, mRNA. // chr1 // 100 // 100 // 0 // --- // 0 /// ENST00000271583 // ENSEMBL // torsin A interacting protein 1 [gene_biotype:protein_coding transc…
TC0100010793.hg.1	TC0100010793.hg.1	chr1	+	179954738	180124751	10	main	Multiple_Complex	NM_014810 // RefSeq // Homo sapiens centrosomal protein 350kDa (CEP350), mRNA. // chr1 // 100 // 100 // 0 // --- // 0 /// ENST00000357434 // ENSEMBL // centrosomal protein 350kDa [gene_biotype:protein_coding transcript_biotype:protein_coding] // chr1 // 100 // 100 // 0 // --- // 0 /// ENST00000367607 // ENSEMBL // centrosomal protein 350kDa [gene_biotype:protein_coding transcript_biotype:protein_…
TC0100010798.hg.1	TC0100010798.hg.1	chr1	+	180154833	180204030	10	main	Multiple_Complex	NM_001004128 // RefSeq // Homo sapiens quiescin Q6 sulfhydryl oxidase 1 (QSOX1), transcript variant 2, mRNA. // chr1 // 100 // 100 // 0 // --- // 0 /// NM_002826 // RefSeq // Homo sapiens quiescin Q6 sulfhydryl oxidase 1 (QSOX1), transcript variant 1, mRNA. // chr1 // 100 // 100 // 0 // --- // 0 /// ENST00000367600 // ENSEMBL // quiescin Q6 sulfhydryl oxidase 1 [gene_biotype:protein_coding transc…
TC0100010799.hg.1	TC0100010799.hg.1	chr1	+	180230286	180278982	10	main	Multiple_Complex	NM_033343 // RefSeq // Homo sapiens LIM homeobox 4 (LHX4), mRNA. // chr1 // 100 // 100 // 0 // --- // 0 /// ENST00000263726 // ENSEMBL // LIM homeobox 4 [gene_biotype:protein_coding transcript_biotype:protein_coding] // chr1 // 100 // 100 // 0 // --- // 0 /// ENST00000558139 // ENSEMBL // LIM homeobox 4 [gene_biotype:protein_coding transcript_biotype:retained_intron] // chr1 // 100 // 100 // 0 //…
TC0100010806.hg.1	TC0100010806.hg.1	chr1	+	180632004	180890279	10	main	Multiple_Complex	NM_001135669 // RefSeq // Homo sapiens xenotropic and polytropic retrovirus receptor 1 (XPR1), transcript variant 2, mRNA. // chr1 // 100 // 100 // 0 // --- // 0 /// NM_004736 // RefSeq // Homo sapiens xenotropic and polytropic retrovirus receptor 1 (XPR1), transcript variant 1, mRNA. // chr1 // 100 // 100 // 0 // --- // 0 /// ENST00000367589 // ENSEMBL // xenotropic and polytropic retrovirus rec…
TC0100010810.hg.1	TC0100010810.hg.1	chr1	+	180913154	180951614	10	main	Multiple_Complex	NM_020950 // RefSeq // Homo sapiens KIAA1614 (KIAA1614), mRNA. // chr1 // 100 // 100 // 0 // --- // 0 /// ENST00000367587 // ENSEMBL // KIAA1614 [gene_biotype:protein_coding transcript_biotype:protein_coding] // chr1 // 100 // 100 // 0 // --- // 0 /// ENST00000367588 // ENSEMBL // KIAA1614 [gene_biotype:protein_coding transcript_biotype:protein_coding] // chr1 // 100 // 100 // 0 // --- // 0 /// E…
TC0100010815.hg.1	TC0100010815.hg.1	chr1	+	181033425	181061938	10	main	Multiple_Complex	NM_001194999 // RefSeq // Homo sapiens major histocompatibility complex, class I-related (MR1), transcript variant 2, mRNA. // chr1 // 100 // 100 // 0 // --- // 0 /// NM_001195000 // RefSeq // Homo sapiens major histocompatibility complex, class I-related (MR1), transcript variant 3, mRNA. // chr1 // 100 // 100 // 0 // --- // 0 /// NM_001195035 // RefSeq // Homo sapiens major histocompatibility c…
TC0100010824.hg.1	TC0100010824.hg.1	chr1	+	181413102	181808084	10	main	Multiple_Complex	NM_000721 // RefSeq // Homo sapiens calcium channel, voltage-dependent, R type, alpha 1E subunit (CACNA1E), transcript variant 3, mRNA. // chr1 // 100 // 100 // 0 // --- // 0 /// NM_001205293 // RefSeq // Homo sapiens calcium channel, voltage-dependent, R type, alpha 1E subunit (CACNA1E), transcript variant 1, mRNA. // chr1 // 100 // 100 // 0 // --- // 0 /// NM_001205294 // RefSeq // Homo sapiens…
TC0100010843.hg.1	TC0100010843.hg.1	chr1	+	182407621	182414815	10	main	Multiple_Complex	NR_034131 // RefSeq // Homo sapiens long intergenic non-protein coding RNA 272 (LINC00272), long non-coding RNA. // chr1 // 100 // 100 // 0 // --- // 0 /// ENST00000367563 // ENSEMBL // long intergenic non-protein coding RNA 272 [gene_biotype:lincRNA transcript_biotype:lincRNA] // chr1 // 100 // 100 // 0 // --- // 0 /// ENST00000612603 // ENSEMBL // long intergenic non-protein coding RNA 272 [gen…
TC0100010846.hg.1	TC0100010846.hg.1	chr1	+	182450121	182560599	10	main	Multiple_Complex	NM_001137669 // RefSeq // Homo sapiens regulator of G-protein signaling like 1 (RGSL1), mRNA. // chr1 // 100 // 100 // 0 // --- // 0 /// ENST00000294854 // ENSEMBL // regulator of G-protein signaling like 1 [gene_biotype:protein_coding transcript_biotype:protein_coding] // chr1 // 100 // 100 // 0 // --- // 0 /// ENST00000367561 // ENSEMBL // regulator of G-protein signaling like 1 [gene_biotype:p…
TC0100010855.hg.1	TC0100010855.hg.1	chr1	+	182789293	182830384	10	main	Multiple_Complex	NM_001200050 // RefSeq // Homo sapiens N-acetylneuraminate pyruvate lyase (dihydrodipicolinate synthase) (NPL), transcript variant 2, mRNA. // chr1 // 100 // 100 // 0 // --- // 0 /// NM_001200051 // RefSeq // Homo sapiens N-acetylneuraminate pyruvate lyase (dihydrodipicolinate synthase) (NPL), transcript variant 4, mRNA. // chr1 // 100 // 100 // 0 // --- // 0 /// NM_001200052 // RefSeq // Homo sa…
TC0100010858.hg.1	TC0100010858.hg.1	chr1	+	182839304	182887982	10	main	Multiple_Complex	NM_001357 // RefSeq // Homo sapiens DEAH (Asp-Glu-Ala-His) box helicase 9 (DHX9), transcript variant 1, mRNA. // chr1 // 100 // 100 // 0 // --- // 0 /// NR_033302 // RefSeq // Homo sapiens DEAH (Asp-Glu-Ala-His) box helicase 9 (DHX9), transcript variant 2, non-coding RNA. // chr1 // 100 // 100 // 0 // --- // 0 /// ENST00000367549 // ENSEMBL // DEAH (Asp-Glu-Ala-His) box helicase 9 [gene_biotype:p…
TC0100010863.hg.1	TC0100010863.hg.1	chr1	+	183023460	183145592	10	main	Multiple_Complex	NM_002293 // RefSeq // Homo sapiens laminin, gamma 1 (formerly LAMB2) (LAMC1), mRNA. // chr1 // 100 // 100 // 0 // --- // 0 /// ENST00000258341 // ENSEMBL // laminin, gamma 1 (formerly LAMB2) [gene_biotype:protein_coding transcript_biotype:protein_coding] // chr1 // 100 // 100 // 0 // --- // 0 /// ENST00000466964 // ENSEMBL // laminin, gamma 1 (formerly LAMB2) [gene_biotype:protein_coding transcr…
TC0100010867.hg.1	TC0100010867.hg.1	chr1	+	183186039	183245127	10	main	Multiple_Complex	NM_005562 // RefSeq // Homo sapiens laminin, gamma 2 (LAMC2), transcript variant 1, mRNA. // chr1 // 100 // 100 // 0 // --- // 0 /// NM_018891 // RefSeq // Homo sapiens laminin, gamma 2 (LAMC2), transcript variant 2, mRNA. // chr1 // 100 // 100 // 0 // --- // 0 /// ENST00000264144 // ENSEMBL // laminin, gamma 2 [gene_biotype:protein_coding transcript_biotype:protein_coding] // chr1 // 100 // 100 …
TC0100010872.hg.1	TC0100010872.hg.1	chr1	+	183472216	183598246	10	main	Multiple_Complex	NM_001174061 // RefSeq // Homo sapiens SMG7 nonsense mediated mRNA decay factor (SMG7), transcript variant 5, mRNA. // chr1 // 100 // 100 // 0 // --- // 0 /// NM_173156 // RefSeq // Homo sapiens SMG7 nonsense mediated mRNA decay factor (SMG7), transcript variant 1, mRNA. // chr1 // 100 // 100 // 0 // --- // 0 /// NM_201568 // RefSeq // Homo sapiens SMG7 nonsense mediated mRNA decay factor (SMG7),…
TC0100010874.hg.1	TC0100010874.hg.1	chr1	+	183636047	183928551	10	main	Multiple_Complex	NM_001297669 // RefSeq // Homo sapiens ral guanine nucleotide dissociation stimulator-like 1 (RGL1), transcript variant 2, mRNA. // chr1 // 100 // 100 // 0 // --- // 0 /// NM_001297670 // RefSeq // Homo sapiens ral guanine nucleotide dissociation stimulator-like 1 (RGL1), transcript variant 3, mRNA. // chr1 // 100 // 100 // 0 // --- // 0 /// NM_001297671 // RefSeq // Homo sapiens ral guanine nucl…
TC0100010877.hg.1	TC0100010877.hg.1	chr1	+	184051651	184074212	10	main	Multiple_Complex	NM_001127394 // RefSeq // Homo sapiens TSEN15 tRNA splicing endonuclease subunit (TSEN15), transcript variant 2, mRNA. // chr1 // 100 // 100 // 0 // --- // 0 /// NM_001300764 // RefSeq // Homo sapiens TSEN15 tRNA splicing endonuclease subunit (TSEN15), transcript variant 4, mRNA. // chr1 // 100 // 100 // 0 // --- // 0 /// NM_001300766 // RefSeq // Homo sapiens TSEN15 tRNA splicing endonuclease su…
TC0100010887.hg.1	TC0100010887.hg.1	chr1	+	184387016	184629021	10	main	Multiple_Complex	NM_030806 // RefSeq // Homo sapiens chromosome 1 open reading frame 21 (C1orf21), mRNA. // chr1 // 100 // 100 // 0 // --- // 0 /// ENST00000235307 // ENSEMBL // chromosome 1 open reading frame 21 [gene_biotype:protein_coding transcript_biotype:protein_coding] // chr1 // 100 // 100 // 0 // --- // 0 /// ENST00000367514 // ENSEMBL // chromosome 1 open reading frame 21 [gene_biotype:protein_coding tr…
TC0100010903.hg.1	TC0100010903.hg.1	chr1	+	185045364	185102608	10	main	Multiple_Complex	NM_007212 // RefSeq // Homo sapiens ring finger protein 2 (RNF2), mRNA. // chr1 // 100 // 100 // 0 // --- // 0 /// ENST00000367509 // ENSEMBL // ring finger protein 2 [gene_biotype:protein_coding transcript_biotype:protein_coding] // chr1 // 100 // 100 // 0 // --- // 0 /// ENST00000367510 // ENSEMBL // ring finger protein 2 [gene_biotype:protein_coding transcript_biotype:protein_coding] // chr1 /…
TC0100010905.hg.1	TC0100010905.hg.1	chr1	+	185157060	185291781	10	main	Multiple_Complex	NM_001105518 // RefSeq // Homo sapiens SWT1 RNA endoribonuclease homolog (SWT1), transcript variant 2, mRNA. // chr1 // 100 // 100 // 0 // --- // 0 /// NM_017673 // RefSeq // Homo sapiens SWT1 RNA endoribonuclease homolog (SWT1), transcript variant 1, mRNA. // chr1 // 100 // 100 // 0 // --- // 0 /// ENST00000367500 // ENSEMBL // SWT1 RNA endoribonuclease homolog (S. cerevisiae) [gene_biotype:prot…
TC0100010921.hg.1	TC0100010921.hg.1	chr1	+	185734551	186190953	10	main	Multiple_Complex	NM_031935 // RefSeq // Homo sapiens hemicentin 1 (HMCN1), mRNA. // chr1 // 100 // 100 // 0 // --- // 0 /// ENST00000271588 // ENSEMBL // hemicentin 1 [gene_biotype:protein_coding transcript_biotype:protein_coding] // chr1 // 100 // 100 // 0 // --- // 0 /// ENST00000414277 // ENSEMBL // hemicentin 1 [gene_biotype:protein_coding transcript_biotype:protein_coding] // chr1 // 100 // 100 // 0 // --- /…
TC0100010923.hg.1	TC0100010923.hg.1	chr1	+	186296273	186314562	10	main	Multiple_Complex	NM_001127708 // RefSeq // Homo sapiens proteoglycan 4 (PRG4), transcript variant B, mRNA. // chr1 // 100 // 100 // 0 // --- // 0 /// NM_001127709 // RefSeq // Homo sapiens proteoglycan 4 (PRG4), transcript variant C, mRNA. // chr1 // 100 // 100 // 0 // --- // 0 /// NM_001127710 // RefSeq // Homo sapiens proteoglycan 4 (PRG4), transcript variant D, mRNA. // chr1 // 100 // 100 // 0 // --- // 0 /// …
TC0100010924.hg.1	TC0100010924.hg.1	chr1	+	186375758	186421378	10	main	Multiple_Complex	NM_001164245 // RefSeq // Homo sapiens chromosome 1 open reading frame 27 (C1orf27), transcript variant 2, mRNA. // chr1 // 100 // 100 // 0 // --- // 0 /// NM_001164246 // RefSeq // Homo sapiens chromosome 1 open reading frame 27 (C1orf27), transcript variant 3, mRNA. // chr1 // 100 // 100 // 0 // --- // 0 /// NM_017847 // RefSeq // Homo sapiens chromosome 1 open reading frame 27 (C1orf27), trans…
TC0100010925.hg.1	TC0100010925.hg.1	chr1	+	186400572	186401455	10	main	Coding	NM_022375 // RefSeq // Homo sapiens oculomedin (OCLM), mRNA. // chr1 // 100 // 100 // 0 // --- // 0 /// ENST00000574641 // ENSEMBL // oculomedin [gene_biotype:protein_coding transcript_biotype:protein_coding] // chr1 // 100 // 100 // 0 // --- // 0 /// BC069096 // GenBank // Homo sapiens oculomedin, mRNA (cDNA clone MGC:95371 IMAGE:7216910), complete cds. // chr1 // 100 // 100 // 0 // --- // 0 ///…
TC0100010926.hg.1	TC0100010926.hg.1	chr1	+	186403221	186404042	6	main	Unassigned	OCLM.bAug10-unspliced // Ace View // Transcript Identified by AceView, Entrez Gene ID(s) 10896 // chr1 // 100 // 100 // 0 // --- // 0
TC0100010939.hg.1	TC0100010939.hg.1	chr1	+	186828900	186988981	10	main	Multiple_Complex	NM_001311193 // RefSeq // Homo sapiens phospholipase A2, group IVA (cytosolic, calcium-dependent) (PLA2G4A), transcript variant 2, mRNA. // chr1 // 100 // 100 // 0 // --- // 0 /// NM_024420 // RefSeq // Homo sapiens phospholipase A2, group IVA (cytosolic, calcium-dependent) (PLA2G4A), transcript variant 1, mRNA. // chr1 // 100 // 100 // 0 // --- // 0 /// ENST00000367466 // ENSEMBL // phospholipas…
TC0100011001.hg.1	TC0100011001.hg.1	chr1	+	192158457	192185815	10	main	Multiple_Complex	NM_130782 // RefSeq // Homo sapiens regulator of G-protein signaling 18 (RGS18), mRNA. // chr1 // 100 // 100 // 0 // --- // 0 /// ENST00000367460 // ENSEMBL // regulator of G-protein signaling 18 [gene_biotype:protein_coding transcript_biotype:protein_coding] // chr1 // 100 // 100 // 0 // --- // 0 /// ENST00000481707 // ENSEMBL // regulator of G-protein signaling 18 [gene_biotype:protein_coding t…
TC0100011004.hg.1	TC0100011004.hg.1	chr1	+	192316992	192367285	10	main	Coding	NM_001039152 // RefSeq // Homo sapiens regulator of G-protein signaling 21 (RGS21), mRNA. // chr1 // 100 // 100 // 0 // --- // 0 /// ENST00000417209 // ENSEMBL // regulator of G-protein signaling 21 [gene_biotype:protein_coding transcript_biotype:protein_coding] // chr1 // 100 // 100 // 0 // --- // 0 /// OTTHUMT00000086387 // Havana transcript // regulator of G-protein signaling 21[gene_biotype:p…
TC0100011012.hg.1	TC0100011012.hg.1	chr1	+	192575727	192580031	10	main	Multiple_Complex	NM_002922 // RefSeq // Homo sapiens regulator of G-protein signaling 1 (RGS1), mRNA. // chr1 // 100 // 100 // 0 // --- // 0 /// ENST00000367459 // ENSEMBL // regulator of G-protein signaling 1 [gene_biotype:protein_coding transcript_biotype:protein_coding] // chr1 // 100 // 100 // 0 // --- // 0 /// ENST00000462589 // ENSEMBL // regulator of G-protein signaling 1 [gene_biotype:protein_coding trans…
TC0100011014.hg.1	TC0100011014.hg.1	chr1	+	192636138	192660310	10	main	Multiple_Complex	NM_002927 // RefSeq // Homo sapiens regulator of G-protein signaling 13 (RGS13), transcript variant 1, mRNA. // chr1 // 100 // 100 // 0 // --- // 0 /// NM_144766 // RefSeq // Homo sapiens regulator of G-protein signaling 13 (RGS13), transcript variant 2, mRNA. // chr1 // 100 // 100 // 0 // --- // 0 /// ENST00000391995 // ENSEMBL // regulator of G-protein signaling 13 [gene_biotype:protein_coding …
TC0100011022.hg.1	TC0100011022.hg.1	chr1	+	192809039	192812283	10	main	Multiple_Complex	NM_002923 // RefSeq // Homo sapiens regulator of G-protein signaling 2 (RGS2), mRNA. // chr1 // 100 // 100 // 0 // --- // 0 /// ENST00000235382 // ENSEMBL // regulator of G-protein signaling 2 [gene_biotype:protein_coding transcript_biotype:protein_coding] // chr1 // 100 // 100 // 0 // --- // 0 /// ENST00000464302 // ENSEMBL // regulator of G-protein signaling 2 [gene_biotype:protein_coding trans…
TC0100011026.hg.1	TC0100011026.hg.1	chr1	+	193059422	193091777	10	main	Multiple_Complex	NM_001042369 // RefSeq // Homo sapiens TROVE domain family, member 2 (TROVE2), transcript variant 1, mRNA. // chr1 // 100 // 100 // 0 // --- // 0 /// NM_001042370 // RefSeq // Homo sapiens TROVE domain family, member 2 (TROVE2), transcript variant 3, mRNA. // chr1 // 100 // 100 // 0 // --- // 0 /// NM_001173524 // RefSeq // Homo sapiens TROVE domain family, member 2 (TROVE2), transcript variant 5…
TC0100011027.hg.1	TC0100011027.hg.1	chr1	+	193121958	193254812	10	main	Multiple_Complex	NM_024529 // RefSeq // Homo sapiens cell division cycle 73 (CDC73), mRNA. // chr1 // 100 // 100 // 0 // --- // 0 /// ENST00000367435 // ENSEMBL // cell division cycle 73 [gene_biotype:protein_coding transcript_biotype:protein_coding] // chr1 // 100 // 100 // 0 // --- // 0 /// ENST00000477868 // ENSEMBL // cell division cycle 73 [gene_biotype:protein_coding transcript_biotype:processed_transcript]…
TC0100011064.hg.1	TC0100011064.hg.1	chr1	+	196651878	196747504	10	main	Multiple_Complex	NM_000186 // RefSeq // Homo sapiens complement factor H (CFH), transcript variant 1, mRNA. // chr1 // 100 // 100 // 0 // --- // 0 /// NM_001014975 // RefSeq // Homo sapiens complement factor H (CFH), transcript variant 2, mRNA. // chr1 // 100 // 100 // 0 // --- // 0 /// ENST00000359637 // ENSEMBL // complement factor H [gene_biotype:protein_coding transcript_biotype:protein_coding] // chr1 // 100…
TC0100011066.hg.1	TC0100011066.hg.1	chr1	+	196774795	196795406	10	main	Multiple_Complex	NM_001166624 // RefSeq // Homo sapiens complement factor H-related 3 (CFHR3), transcript variant 2, mRNA. // chr1 // 100 // 100 // 0 // --- // 0 /// NM_021023 // RefSeq // Homo sapiens complement factor H-related 3 (CFHR3), transcript variant 1, mRNA. // chr1 // 100 // 100 // 0 // --- // 0 /// ENST00000367425 // ENSEMBL // complement factor H-related 3 [gene_biotype:protein_coding transcript_biot…
TC0100011068.hg.1	TC0100011068.hg.1	chr1	+	196850241	196918972	10	main	Coding	NM_001201550 // RefSeq // Homo sapiens complement factor H-related 4 (CFHR4), transcript variant 1, mRNA. // chr1 // 100 // 100 // 0 // --- // 0 /// NM_001201551 // RefSeq // Homo sapiens complement factor H-related 4 (CFHR4), transcript variant 2, mRNA. // chr1 // 100 // 100 // 0 // --- // 0 /// NM_006684 // RefSeq // Homo sapiens complement factor H-related 4 (CFHR4), transcript variant 3, mRNA…
TC0100011070.hg.1	TC0100011070.hg.1	chr1	+	196977537	197009674	10	main	Coding	NM_030787 // RefSeq // Homo sapiens complement factor H-related 5 (CFHR5), mRNA. // chr1 // 100 // 100 // 0 // --- // 0 /// ENST00000256785 // ENSEMBL // complement factor H-related 5 [gene_biotype:protein_coding transcript_biotype:protein_coding] // chr1 // 100 // 100 // 0 // --- // 0 /// BC111773 // GenBank // Homo sapiens complement factor H-related 5, mRNA (cDNA clone MGC:133240 IMAGE:4003446…
TC0100011073.hg.1	TC0100011073.hg.1	chr1	+	197201462	197478455	10	main	Multiple_Complex	NM_001193640 // RefSeq // Homo sapiens crumbs family member 1, photoreceptor morphogenesis associated (CRB1), transcript variant 2, mRNA. // chr1 // 100 // 100 // 0 // --- // 0 /// NM_001257965 // RefSeq // Homo sapiens crumbs family member 1, photoreceptor morphogenesis associated (CRB1), transcript variant 3, mRNA. // chr1 // 100 // 100 // 0 // --- // 0 /// NM_001257966 // RefSeq // Homo sapien…
TC0100011091.hg.1	TC0100011091.hg.1	chr1	+	197902552	197907367	10	main	Multiple_Complex	NM_001024594 // RefSeq // Homo sapiens chromosome 1 open reading frame 53 (C1orf53), mRNA. // chr1 // 100 // 100 // 0 // --- // 0 /// ENST00000367393 // ENSEMBL // chromosome 1 open reading frame 53 [gene_biotype:protein_coding transcript_biotype:protein_coding] // chr1 // 100 // 100 // 0 // --- // 0 /// ENST00000436652 // ENSEMBL // chromosome 1 open reading frame 53 [gene_biotype:protein_coding…
TC0100011092.hg.1	TC0100011092.hg.1	chr1	+	197911902	197935478	10	main	Multiple_Complex	NM_001014434 // RefSeq // Homo sapiens LIM homeobox 9 (LHX9), transcript variant 2, mRNA. // chr1 // 100 // 100 // 0 // --- // 0 /// NM_020204 // RefSeq // Homo sapiens LIM homeobox 9 (LHX9), transcript variant 1, mRNA. // chr1 // 100 // 100 // 0 // --- // 0 /// ENST00000367387 // ENSEMBL // LIM homeobox 9 [gene_biotype:protein_coding transcript_biotype:protein_coding] // chr1 // 100 // 100 // 0 …
TC0100011096.hg.1	TC0100011096.hg.1	chr1	+	198156963	198605176	10	main	Multiple_Complex	NM_133494 // RefSeq // Homo sapiens NIMA-related kinase 7 (NEK7), mRNA. // chr1 // 100 // 100 // 0 // --- // 0 /// ENST00000367383 // ENSEMBL // NIMA-related kinase 7 [gene_biotype:protein_coding transcript_biotype:protein_coding] // chr1 // 100 // 100 // 0 // --- // 0 /// ENST00000367385 // ENSEMBL // NIMA-related kinase 7 [gene_biotype:protein_coding transcript_biotype:protein_coding] // chr1 /…
TC0100011105.hg.1	TC0100011105.hg.1	chr1	+	198638671	198757476	10	main	Multiple_Complex	NM_001267798 // RefSeq // Homo sapiens protein tyrosine phosphatase, receptor type, C (PTPRC), transcript variant 5, mRNA. // chr1 // 100 // 100 // 0 // --- // 0 /// NM_002838 // RefSeq // Homo sapiens protein tyrosine phosphatase, receptor type, C (PTPRC), transcript variant 1, mRNA. // chr1 // 100 // 100 // 0 // --- // 0 /// NM_080921 // RefSeq // Homo sapiens protein tyrosine phosphatase, rece…
TC0100011129.hg.1	TC0100011129.hg.1	chr1	+	200027602	200177424	10	main	Multiple_Complex	NM_001276464 // RefSeq // Homo sapiens nuclear receptor subfamily 5, group A, member 2 (NR5A2), transcript variant 3, mRNA. // chr1 // 100 // 100 // 0 // --- // 0 /// NM_003822 // RefSeq // Homo sapiens nuclear receptor subfamily 5, group A, member 2 (NR5A2), transcript variant 2, mRNA. // chr1 // 100 // 100 // 0 // --- // 0 /// NM_205860 // RefSeq // Homo sapiens nuclear receptor subfamily 5, gr…
TC0100011148.hg.1	TC0100011148.hg.1	chr1	+	200739558	200860707	10	main	Multiple_Complex	NM_001297707 // RefSeq // Homo sapiens calmodulin regulated spectrin-associated protein family, member 2 (CAMSAP2), transcript variant 1, mRNA. // chr1 // 100 // 100 // 0 // --- // 0 /// NM_001297708 // RefSeq // Homo sapiens calmodulin regulated spectrin-associated protein family, member 2 (CAMSAP2), transcript variant 3, mRNA. // chr1 // 100 // 100 // 0 // --- // 0 /// NM_203459 // RefSeq // Ho…
TC0100011152.hg.1	TC0100011152.hg.1	chr1	+	200872955	200874178	10	main	Coding	NM_005298 // RefSeq // Homo sapiens G protein-coupled receptor 25 (GPR25), mRNA. // chr1 // 100 // 100 // 0 // --- // 0 /// ENST00000304244 // ENSEMBL // G protein-coupled receptor 25 [gene_biotype:protein_coding transcript_biotype:protein_coding] // chr1 // 100 // 100 // 0 // --- // 0 /// BC126386 // GenBank // Homo sapiens G protein-coupled receptor 25, mRNA (cDNA clone MGC:161664 IMAGE:8992102…
TC0100011153.hg.1	TC0100011153.hg.1	chr1	+	200891048	200915736	10	main	Multiple_Complex	NM_001142569 // RefSeq // Homo sapiens chromosome 1 open reading frame 106 (C1orf106), transcript variant 2, mRNA. // chr1 // 100 // 100 // 0 // --- // 0 /// NM_018265 // RefSeq // Homo sapiens chromosome 1 open reading frame 106 (C1orf106), transcript variant 1, mRNA. // chr1 // 100 // 100 // 0 // --- // 0 /// ENST00000367342 // ENSEMBL // chromosome 1 open reading frame 106 [gene_biotype:protei…
TC0100011162.hg.1	TC0100011162.hg.1	chr1	+	201190825	201228952	10	main	Multiple_Complex	NM_001164586 // RefSeq // Homo sapiens immunoglobulin-like and fibronectin type III domain containing 1 (IGFN1), mRNA. // chr1 // 100 // 100 // 0 // --- // 0 /// ENST00000295591 // ENSEMBL // immunoglobulin-like and fibronectin type III domain containing 1 [gene_biotype:protein_coding transcript_biotype:protein_coding] // chr1 // 100 // 100 // 0 // --- // 0 /// ENST00000335211 // ENSEMBL // immun…
TC0100011163.hg.1	TC0100011163.hg.1	chr1	+	201283452	201332993	10	main	Multiple_Complex	NM_000299 // RefSeq // Homo sapiens plakophilin 1 (PKP1), transcript variant 1b, mRNA. // chr1 // 100 // 100 // 0 // --- // 0 /// NM_001005337 // RefSeq // Homo sapiens plakophilin 1 (PKP1), transcript variant 1a, mRNA. // chr1 // 100 // 100 // 0 // --- // 0 /// ENST00000263946 // ENSEMBL // plakophilin 1 [gene_biotype:protein_coding transcript_biotype:protein_coding] // chr1 // 100 // 100 // 0 /…
TC0100011192.hg.1	TC0100011192.hg.1	chr1	+	201829141	201884294	10	main	Multiple_Complex	NM_018085 // RefSeq // Homo sapiens importin 9 (IPO9), mRNA. // chr1 // 100 // 100 // 0 // --- // 0 /// ENST00000361565 // ENSEMBL // importin 9 [gene_biotype:protein_coding transcript_biotype:protein_coding] // chr1 // 100 // 100 // 0 // --- // 0 /// ENST00000456707 // ENSEMBL // importin 9 [gene_biotype:protein_coding transcript_biotype:protein_coding] // chr1 // 100 // 100 // 0 // --- // 0 ///…
TC0100011197.hg.1	TC0100011197.hg.1	chr1	+	201888669	201892587	10	main	Multiple_Complex	NM_198149 // RefSeq // Homo sapiens shisa family member 4 (SHISA4), transcript variant 1, mRNA. // chr1 // 100 // 100 // 0 // --- // 0 /// NR_030775 // RefSeq // Homo sapiens shisa family member 4 (SHISA4), transcript variant 2, non-coding RNA. // chr1 // 100 // 100 // 0 // --- // 0 /// ENST00000362011 // ENSEMBL // shisa family member 4 [gene_biotype:protein_coding transcript_biotype:protein_cod…
TC0100011200.hg.1	TC0100011200.hg.1	chr1	+	201955491	201970661	10	main	Multiple_Complex	NM_006335 // RefSeq // Homo sapiens translocase of inner mitochondrial membrane 17 homolog A (yeast) (TIMM17A), mRNA. // chr1 // 100 // 100 // 0 // --- // 0 /// ENST00000367287 // ENSEMBL // translocase of inner mitochondrial membrane 17 homolog A (yeast) [gene_biotype:protein_coding transcript_biotype:protein_coding] // chr1 // 100 // 100 // 0 // --- // 0 /// ENST00000478378 // ENSEMBL // transl…
TC0100011203.hg.1	TC0100011203.hg.1	chr1	+	201982372	202006147	10	main	Multiple_Complex	NM_020216 // RefSeq // Homo sapiens arginyl aminopeptidase (aminopeptidase B) (RNPEP), mRNA. // chr1 // 100 // 100 // 0 // --- // 0 /// ENST00000295640 // ENSEMBL // arginyl aminopeptidase (aminopeptidase B) [gene_biotype:protein_coding transcript_biotype:protein_coding] // chr1 // 100 // 100 // 0 // --- // 0 /// ENST00000367286 // ENSEMBL // arginyl aminopeptidase (aminopeptidase B) [gene_biotyp…
TC0100011205.hg.1	TC0100011205.hg.1	chr1	+	202007945	202017188	10	main	Multiple_Complex	NM_001114309 // RefSeq // Homo sapiens E74-like factor 3 (ets domain transcription factor, epithelial-specific) (ELF3), transcript variant 2, mRNA. // chr1 // 100 // 100 // 0 // --- // 0 /// NM_004433 // RefSeq // Homo sapiens E74-like factor 3 (ets domain transcription factor, epithelial-specific) (ELF3), transcript variant 1, mRNA. // chr1 // 100 // 100 // 0 // --- // 0 /// ENST00000359651 // E…
TC0100011211.hg.1	TC0100011211.hg.1	chr1	+	202122858	202133592	10	main	Multiple_Complex	NM_004767 // RefSeq // Homo sapiens G protein-coupled receptor 37 like 1 (GPR37L1), mRNA. // chr1 // 100 // 100 // 0 // --- // 0 /// ENST00000367282 // ENSEMBL // G protein-coupled receptor 37 like 1 [gene_biotype:protein_coding transcript_biotype:protein_coding] // chr1 // 100 // 100 // 0 // --- // 0 /// BC050334 // GenBank // Homo sapiens G protein-coupled receptor 37 like 1, mRNA (cDNA clone M…
TC0100011215.hg.1	TC0100011215.hg.1	chr1	+	202193901	202319781	10	main	Multiple_Complex	NM_001017403 // RefSeq // Homo sapiens leucine-rich repeat containing G protein-coupled receptor 6 (LGR6), transcript variant 1, mRNA. // chr1 // 100 // 100 // 0 // --- // 0 /// NM_001017404 // RefSeq // Homo sapiens leucine-rich repeat containing G protein-coupled receptor 6 (LGR6), transcript variant 3, mRNA. // chr1 // 100 // 100 // 0 // --- // 0 /// NM_021636 // RefSeq // Homo sapiens leucine…
TC0100011219.hg.1	TC0100011219.hg.1	chr1	+	202348699	202604763	10	main	Multiple_Complex	NM_001167857 // RefSeq // Homo sapiens protein phosphatase 1, regulatory subunit 12B (PPP1R12B), transcript variant 5, mRNA. // chr1 // 100 // 100 // 0 // --- // 0 /// NM_001167858 // RefSeq // Homo sapiens protein phosphatase 1, regulatory subunit 12B (PPP1R12B), transcript variant 6, mRNA. // chr1 // 100 // 100 // 0 // --- // 0 /// NM_001197131 // RefSeq // Homo sapiens protein phosphatase 1, r…
TC0100011236.hg.1	TC0100011236.hg.1	chr1	+	202820257	202827225	10	main	Multiple_Complex	NR_038135 // RefSeq // Homo sapiens MGAT4 family, member E, pseudogene (MGAT4EP), non-coding RNA. // chr1 // 100 // 100 // 0 // --- // 0 /// ENST00000330493 // ENSEMBL // MGAT4 family, member E, pseudogene [gene_biotype:transcribed_unitary_pseudogene transcript_biotype:processed_transcript] // chr1 // 100 // 100 // 0 // --- // 0 /// ENST00000549576 // ENSEMBL // MGAT4 family, member E, pseudogene…
TC0100011242.hg.1	TC0100011242.hg.1	chr1	+	203007386	203024848	10	main	Multiple_Complex	NM_138391 // RefSeq // Homo sapiens transmembrane protein 183A (TMEM183A), mRNA. // chr1 // 100 // 100 // 0 // --- // 0 /// BC013073 // GenBank // Homo sapiens transmembrane protein 183A, mRNA (cDNA clone MGC:17225 IMAGE:4151716), complete cds. // chr1 // 100 // 100 // 0 // --- // 0 /// BC038952 // GenBank // Homo sapiens transmembrane protein 183A, mRNA (cDNA clone MGC:47784 IMAGE:5740484), comp…
TC0100011243.hg.1	TC0100011243.hg.1	chr1	+	203026498	203078740	10	main	Multiple_Complex	NM_001304331 // RefSeq // Homo sapiens protein tyrosine phosphatase, receptor type, f polypeptide (PTPRF), interacting protein (liprin), alpha 4 (PPFIA4), transcript variant 1, mRNA. // chr1 // 100 // 100 // 0 // --- // 0 /// NM_001304332 // RefSeq // Homo sapiens protein tyrosine phosphatase, receptor type, f polypeptide (PTPRF), interacting protein (liprin), alpha 4 (PPFIA4), transcript variant…
TC0100011245.hg.1	TC0100011245.hg.1	chr1	+	203090654	203167405	10	main	Multiple_Complex	NM_000674 // RefSeq // Homo sapiens adenosine A1 receptor (ADORA1), transcript variant 1, mRNA. // chr1 // 100 // 100 // 0 // --- // 0 /// NM_001048230 // RefSeq // Homo sapiens adenosine A1 receptor (ADORA1), transcript variant 2, mRNA. // chr1 // 100 // 100 // 0 // --- // 0 /// ENST00000309502 // ENSEMBL // adenosine A1 receptor [gene_biotype:protein_coding transcript_biotype:protein_coding] //…
TC0100011253.hg.1	TC0100011253.hg.1	chr1	+	203305491	203309602	10	main	Multiple_Complex	NM_006763 // RefSeq // Homo sapiens BTG family, member 2 (BTG2), mRNA. // chr1 // 100 // 100 // 0 // --- // 0 /// ENST00000290551 // ENSEMBL // BTG family, member 2 [gene_biotype:protein_coding transcript_biotype:protein_coding] // chr1 // 100 // 100 // 0 // --- // 0 /// ENST00000475157 // ENSEMBL // BTG family, member 2 [gene_biotype:protein_coding transcript_biotype:nonsense_mediated_decay] // …
TC0100011262.hg.1	TC0100011262.hg.1	chr1	+	203475755	203491352	10	main	Coding	NM_002725 // RefSeq // Homo sapiens proline/arginine-rich end leucine-rich repeat protein (PRELP), transcript variant 1, mRNA. // chr1 // 100 // 100 // 0 // --- // 0 /// NM_201348 // RefSeq // Homo sapiens proline/arginine-rich end leucine-rich repeat protein (PRELP), transcript variant 2, mRNA. // chr1 // 100 // 100 // 0 // --- // 0 /// ENST00000343110 // ENSEMBL // proline/arginine-rich end leu…
TC0100011263.hg.1	TC0100011263.hg.1	chr1	+	203494143	203508949	10	main	Coding	NM_014359 // RefSeq // Homo sapiens opticin (OPTC), mRNA. // chr1 // 100 // 100 // 0 // --- // 0 /// ENST00000367222 // ENSEMBL // opticin [gene_biotype:protein_coding transcript_biotype:protein_coding] // chr1 // 100 // 100 // 0 // --- // 0 /// ENST00000448911 // ENSEMBL // opticin [gene_biotype:protein_coding transcript_biotype:protein_coding] // chr1 // 100 // 100 // 0 // --- // 0 /// BC074942…
TC0100011267.hg.1	TC0100011267.hg.1	chr1	+	203626561	203744081	10	main	Multiple_Complex	NM_001001396 // RefSeq // Homo sapiens ATPase, Ca++ transporting, plasma membrane 4 (ATP2B4), transcript variant 1, mRNA. // chr1 // 100 // 100 // 0 // --- // 0 /// NM_001684 // RefSeq // Homo sapiens ATPase, Ca++ transporting, plasma membrane 4 (ATP2B4), transcript variant 2, mRNA. // chr1 // 100 // 100 // 0 // --- // 0 /// ENST00000341360 // ENSEMBL // ATPase, Ca++ transporting, plasma membrane…
TC0100011269.hg.1	TC0100011269.hg.1	chr1	+	203730577	203731853	10	main	Multiple_Complex	NR_046213 // RefSeq // Homo sapiens long intergenic non-protein coding RNA 260 (LINC00260), long non-coding RNA. // chr1 // 100 // 100 // 0 // --- // 0 /// BC000988 // GenBank // Homo sapiens chromosome 1 open reading frame 217, mRNA (cDNA clone MGC:5457 IMAGE:3450898), complete cds. // chr1 // 100 // 100 // 0 // --- // 0 /// NONHSAT008901 // lncRNAWiki // Non-coding transcript identified by NONC…
TC0100011270.hg.1	TC0100011270.hg.1	chr1	+	203765156	203776352	10	main	Multiple_Complex	NM_001136190 // RefSeq // Homo sapiens lymphocyte transmembrane adaptor 1 (LAX1), transcript variant 2, mRNA. // chr1 // 100 // 100 // 0 // --- // 0 /// NM_001282878 // RefSeq // Homo sapiens lymphocyte transmembrane adaptor 1 (LAX1), transcript variant 3, mRNA. // chr1 // 100 // 100 // 0 // --- // 0 /// NM_017773 // RefSeq // Homo sapiens lymphocyte transmembrane adaptor 1 (LAX1), transcript var…
TC0100011272.hg.1	TC0100011272.hg.1	chr1	+	203795623	203854128	10	main	Multiple_Complex	NM_001174108 // RefSeq // Homo sapiens zinc finger, BED-type containing 6 (ZBED6), mRNA. // chr1 // 100 // 100 // 0 // --- // 0 /// NM_014827 // RefSeq // Homo sapiens zinc finger CCCH-type containing 11A (ZC3H11A), mRNA. // chr1 // 100 // 100 // 0 // --- // 0 /// ENST00000550078 // ENSEMBL // zinc finger, BED-type containing 6 [gene_biotype:protein_coding transcript_biotype:protein_coding] // ch…
TC0100011276.hg.1	TC0100011276.hg.1	chr1	+	203861585	203871152	10	main	Multiple_Complex	NM_001304464 // RefSeq // Homo sapiens small nuclear ribonucleoprotein polypeptide E (SNRPE), transcript variant 2, mRNA. // chr1 // 100 // 100 // 0 // --- // 0 /// NM_003094 // RefSeq // Homo sapiens small nuclear ribonucleoprotein polypeptide E (SNRPE), transcript variant 1, mRNA. // chr1 // 100 // 100 // 0 // --- // 0 /// NR_130746 // RefSeq // Homo sapiens small nuclear ribonucleoprotein poly…
TC0100011282.hg.1	TC0100011282.hg.1	chr1	+	204073099	204127743	10	main	Multiple_Complex	NM_005686 // RefSeq // Homo sapiens SRY (sex determining region Y)-box 13 (SOX13), mRNA. // chr1 // 100 // 100 // 0 // --- // 0 /// ENST00000272193 // ENSEMBL // SRY (sex determining region Y)-box 13 [gene_biotype:protein_coding transcript_biotype:processed_transcript] // chr1 // 100 // 100 // 0 // --- // 0 /// ENST00000367203 // ENSEMBL // SRY (sex determining region Y)-box 13 [gene_biotype:prot…
TC0100011316.hg.1	TC0100011316.hg.1	chr1	+	204828651	205022822	10	main	Multiple_Complex	NM_001005388 // RefSeq // Homo sapiens neurofascin (NFASC), transcript variant 1, mRNA. // chr1 // 100 // 100 // 0 // --- // 0 /// NM_001005389 // RefSeq // Homo sapiens neurofascin (NFASC), transcript variant 5, mRNA. // chr1 // 100 // 100 // 0 // --- // 0 /// NM_001160331 // RefSeq // Homo sapiens neurofascin (NFASC), transcript variant 2, mRNA. // chr1 // 100 // 100 // 0 // --- // 0 /// NM_001…
TC0100011320.hg.1	TC0100011320.hg.1	chr1	+	205043197	205078499	10	main	Multiple_Complex	NM_005076 // RefSeq // Homo sapiens contactin 2 (axonal) (CNTN2), mRNA. // chr1 // 100 // 100 // 0 // --- // 0 /// ENST00000331830 // ENSEMBL // contactin 2 (axonal) [gene_biotype:protein_coding transcript_biotype:protein_coding] // chr1 // 100 // 100 // 0 // --- // 0 /// ENST00000481872 // ENSEMBL // contactin 2 (axonal) [gene_biotype:protein_coding transcript_biotype:retained_intron] // chr1 //…
TC0100011325.hg.1	TC0100011325.hg.1	chr1	+	205227910	205273343	10	main	Multiple_Complex	NM_001242925 // RefSeq // Homo sapiens transmembrane and coiled-coil domain family 2 (TMCC2), transcript variant 2, mRNA. // chr1 // 100 // 100 // 0 // --- // 0 /// NM_001297611 // RefSeq // Homo sapiens transmembrane and coiled-coil domain family 2 (TMCC2), transcript variant 3, mRNA. // chr1 // 100 // 100 // 0 // --- // 0 /// NM_001297613 // RefSeq // Homo sapiens transmembrane and coiled-coil …
TC0100011333.hg.1	TC0100011333.hg.1	chr1	+	205504556	205532793	10	main	Multiple_Complex	NM_002596 // RefSeq // Homo sapiens cyclin-dependent kinase 18 (CDK18), transcript variant 3, mRNA. // chr1 // 100 // 100 // 0 // --- // 0 /// NM_212502 // RefSeq // Homo sapiens cyclin-dependent kinase 18 (CDK18), transcript variant 2, mRNA. // chr1 // 100 // 100 // 0 // --- // 0 /// NM_212503 // RefSeq // Homo sapiens cyclin-dependent kinase 18 (CDK18), transcript variant 1, mRNA. // chr1 // 10…
TC0100011335.hg.1	TC0100011335.hg.1	chr1	+	205519907	205602918	10	main	Multiple_Complex	NM_181644 // RefSeq // Homo sapiens major facilitator superfamily domain containing 4 (MFSD4), mRNA. // chr1 // 100 // 100 // 0 // --- // 0 /// ENST00000367147 // ENSEMBL // major facilitator superfamily domain containing 4 [gene_biotype:protein_coding transcript_biotype:protein_coding] // chr1 // 100 // 100 // 0 // --- // 0 /// ENST00000465651 // ENSEMBL // major facilitator superfamily domain c…
TC0100011361.hg.1	TC0100011361.hg.1	chr1	+	206035237	206102459	10	main	Multiple_Complex	NM_001007544 // RefSeq // Homo sapiens chromosome 1 open reading frame 186 (C1orf186), mRNA. // chr1 // 100 // 100 // 0 // --- // 0 /// ENST00000331555 // ENSEMBL // chromosome 1 open reading frame 186 [gene_biotype:protein_coding transcript_biotype:protein_coding] // chr1 // 100 // 100 // 0 // --- // 0 /// ENST00000577298 // ENSEMBL // chromosome 1 open reading frame 186 [gene_biotype:protein_co…
TC0100011364.hg.1	TC0100011364.hg.1	chr1	+	206203345	206464443	10	main	Multiple_Complex	NM_001170637 // RefSeq // Homo sapiens SLIT-ROBO Rho GTPase activating protein 2 (SRGAP2), transcript variant 3, mRNA. // chr1 // 100 // 100 // 0 // --- // 0 /// NM_001300952 // RefSeq // Homo sapiens SLIT-ROBO Rho GTPase activating protein 2 (SRGAP2), transcript variant 4, mRNA. // chr1 // 100 // 100 // 0 // --- // 0 /// NM_015326 // RefSeq // Homo sapiens SLIT-ROBO Rho GTPase activating protein…
[truncated: 26,357 more rows]
