# Supplementary material for: Integrated bioinformatics analysis and biological experiments to identify key immune genes in vascular dementia
Source: Front Immunol. 2025 Mar 24;16:1560438. doi: 10.3389/fimmu.2025.1560438 (PMC11973090; doi:10.3389/fimmu.2025.1560438)
Supplement: Supplementary file 3 [file Table3.xlsx]

## Sheet: GSE186798-GPL23159_series_matri
!Series_title	Transcriptomic Profiling Reveals Discrete Poststroke Dementia Neuronal and Gliovascular Signatures
!Series_geo_accession	GSE186798
!Series_status	Public on Jun 01 2022
!Series_submission_date	Oct 29 2021
!Series_last_update_date	May 15 2023
!Series_pubmed_id	35639336
!Series_summary	Around 25% of stroke survivors over 65 years old develop progressive cognitive decline more than 3 months post-stroke, with features of vascular dementia. Poststroke dementia (PSD) is associated with pathology in frontal brain regions, in particular dorsal lateral prefrontal cortex (DLPFC) neurons and white matter, remote from the infarct, implicating damage to anterior cognitive circuits (ACC) i…
!Series_summary	Laser capture microdissected neurons, astrocytes and endothelial cells were obtained from the Cognitive Function After Stroke (COGFAST) cohort. Gene expression was assessed using microarrays and pathways analysis to compare changes in PSD with controls and with poststroke non-dementia (PSND). Laser captured microdissected neurons were obtained from the bilateral carotid artery stenosis (BCAS) mod…
!Series_overall_design	Control (n=10), PSD (n=10) and Post-stroke non dementia (PSND) (n=10) human subjects. Sham Group (n=5) and Bilateral carotid artery stenosis (BCAS) gorup (n=5)
!Series_type	Expression profiling by array
!Series_contributor	Rachel,,Waller
!Series_contributor	Yoshiki,,Hase
!Series_contributor	Julie,E,Simpson
!Series_contributor	Paul,R,Heath
!Series_contributor	Matthew,,Wyles
!Series_contributor	Rajesh,,Kalaria
!Series_contributor	Stephen,B,Wharton
!Series_sample_id	GSM5661240 GSM5661241 GSM5661242 GSM5661243 GSM5661244 GSM5661245 GSM5661246 GSM5661247 GSM5661248 GSM5661249 GSM5661250 GSM5661251 GSM5661252 GSM5661253 GSM5661254 GSM5661255 GSM5661256 GSM5661257 GSM5661258 GSM5661259 GSM5661260 GSM5661261 GSM5661262 GSM5661263 GSM5661264 GSM5661265 GSM5661266 GSM5661267 GSM5661268 GSM5661269 GSM5661270 GSM5661271 GSM5661272 GSM5661273 GSM5661274 GSM5661275 GSM…
!Series_contact_name	Rachel,,Waller
!Series_contact_email	r.waller@sheffield.ac.uk
!Series_contact_department	Neuroscience
!Series_contact_institute	The University of Sheffield
!Series_contact_address	SITraN, 385A Glossop Road
!Series_contact_city	SHEFFIELD
!Series_contact_state	South Yorkshire
!Series_contact_zip/postal_code	S102HQ
!Series_contact_country	United Kingdom
!Series_supplementary_file	ftp://ftp.ncbi.nlm.nih.gov/geo/series/GSE186nnn/GSE186798/suppl/GSE186798_RAW.tar
!Series_platform_id	GPL23038
!Series_platform_id	GPL23159
!Series_platform_taxid	9606
!Series_platform_taxid	10090
!Series_sample_taxid	9606
!Series_sample_taxid	10090
!Series_relation	BioProject: https://www.ncbi.nlm.nih.gov/bioproject/PRJNA776138
!Sample_title	PSND LCM Astrocytes_1	PSD LCM Astrocytes_1	PSD LCM Astrocytes_2	Control LCM Astrocytes_1	PSD LCM Astrocytes_3	PSND LCM Astrocytes_2	Control LCM Astrocytes_2	Control LCM Astrocytes_3	Control LCM Astrocytes_4	PSD LCM Astrocytes_4	PSND LCM Astrocytes_3	PSND LCM Astrocytes_4	PSND LCM Astrocytes_5	PSND LCM Astrocytes_6	PSD LCM Astrocytes_5	Control LCM Astrocytes	PSD LCM Astrocytes_6	Control LCM Astrocytes_5	PSD LCM Astrocytes_7	PSND LCM Astrocytes_7	PSD LCM Astrocytes_8	Control LCM Astrocytes_6	PSND LCM Astrocytes_8	Control LCM Astrocytes_7	Control LCM Astrocytes_8	PSD LCM Astrocytes_9	Control LCM Astrocytes_9	PSD LCM Astrocytes_10	PSND LCM Astrocytes_9	PSND LCM Astrocytes_10	PSND LCM Neurons_1	PSD LCM Neurons_1	PSD LCM Neurons_2	Control LCM Neurons_1	PSD LCM Neurons_3	PSND LCM Neurons_2	Control LCM Neurons_2	Control LCM Neurons_3	Control LCM Neurons_4	PSD LCM Neurons_4	PSND LCM Neurons_3	PSND LCM Neurons_4	PSND LCM Neurons_5	PSND LCM Neurons_6	PSD LCM Neurons_5	Control LCM Neurons_5	PSD LCM Neurons_6	Control LCM Neurons_6	PSD LCM Neurons_7
!Sample_geo_accession	GSM5661240	GSM5661241	GSM5661242	GSM5661243	GSM5661244	GSM5661245	GSM5661246	GSM5661247	GSM5661248	GSM5661249	GSM5661250	GSM5661251	GSM5661252	GSM5661253	GSM5661254	GSM5661255	GSM5661256	GSM5661257	GSM5661258	GSM5661259	GSM5661260	GSM5661261	GSM5661262	GSM5661263	GSM5661264	GSM5661265	GSM5661266	GSM5661267	GSM5661268	GSM5661269	GSM5661270	GSM5661271	GSM5661272	GSM5661273	GSM5661274	GSM5661275	GSM5661276	GSM5661277	GSM5661278	GSM5661279	GSM5661280	GSM5661281	GSM5661282	GSM5661283	GSM5661284	GSM5661285	GSM5661286	GSM5661287	GSM5661288
!Sample_status	Public on Jun 01 2022	Public on Jun 01 2022	Public on Jun 01 2022	Public on Jun 01 2022	Public on Jun 01 2022	Public on Jun 01 2022	Public on Jun 01 2022	Public on Jun 01 2022	Public on Jun 01 2022	Public on Jun 01 2022	Public on Jun 01 2022	Public on Jun 01 2022	Public on Jun 01 2022	Public on Jun 01 2022	Public on Jun 01 2022	Public on Jun 01 2022	Public on Jun 01 2022	Public on Jun 01 2022	Public on Jun 01 2022	Public on Jun 01 2022	Public on Jun 01 2022	Public on Jun 01 2022	Public on Jun 01 2022	Public on Jun 01 2022	Public on Jun 01 2022	Public on Jun 01 2022	Public on Jun 01 2022	Public on Jun 01 2022	Public on Jun 01 2022	Public on Jun 01 2022	Public on Jun 01 2022	Public on Jun 01 2022	Public on Jun 01 2022	Public on Jun 01 2022	Public on Jun 01 2022	Public on Jun 01 2022	Public on Jun 01 2022	Public on Jun 01 2022	Public on Jun 01 2022	Public on Jun 01 2022	Public on Jun 01 2022	Public on Jun 01 2022	Public on Jun 01 2022	Public on Jun 01 2022	Public on Jun 01 2022	Public on Jun 01 2022	Public on Jun 01 2022	Public on Jun 01 2022	Public on Jun 01 2022
!Sample_submission_date	Oct 29 2021	Oct 29 2021	Oct 29 2021	Oct 29 2021	Oct 29 2021	Oct 29 2021	Oct 29 2021	Oct 29 2021	Oct 29 2021	Oct 29 2021	Oct 29 2021	Oct 29 2021	Oct 29 2021	Oct 29 2021	Oct 29 2021	Oct 29 2021	Oct 29 2021	Oct 29 2021	Oct 29 2021	Oct 29 2021	Oct 29 2021	Oct 29 2021	Oct 29 2021	Oct 29 2021	Oct 29 2021	Oct 29 2021	Oct 29 2021	Oct 29 2021	Oct 29 2021	Oct 29 2021	Oct 29 2021	Oct 29 2021	Oct 29 2021	Oct 29 2021	Oct 29 2021	Oct 29 2021	Oct 29 2021	Oct 29 2021	Oct 29 2021	Oct 29 2021	Oct 29 2021	Oct 29 2021	Oct 29 2021	Oct 29 2021	Oct 29 2021	Oct 29 2021	Oct 29 2021	Oct 29 2021	Oct 29 2021
!Sample_last_update_date	Jun 01 2022	Jun 01 2022	Jun 01 2022	Jun 01 2022	Jun 01 2022	Jun 01 2022	Jun 01 2022	Jun 01 2022	Jun 01 2022	Jun 01 2022	Jun 01 2022	Jun 01 2022	Jun 01 2022	Jun 01 2022	Jun 01 2022	Jun 01 2022	Jun 01 2022	Jun 01 2022	Jun 01 2022	Jun 01 2022	Jun 01 2022	Jun 01 2022	Jun 01 2022	Jun 01 2022	Jun 01 2022	Jun 01 2022	Jun 01 2022	Jun 01 2022	Jun 01 2022	Jun 01 2022	Jun 01 2022	Jun 01 2022	Jun 01 2022	Jun 01 2022	Jun 01 2022	Jun 01 2022	Jun 01 2022	Jun 01 2022	Jun 01 2022	Jun 01 2022	Jun 01 2022	Jun 01 2022	Jun 01 2022	Jun 01 2022	Jun 01 2022	Jun 01 2022	Jun 01 2022	Jun 01 2022	Jun 01 2022
!Sample_type	RNA	RNA	RNA	RNA	RNA	RNA	RNA	RNA	RNA	RNA	RNA	RNA	RNA	RNA	RNA	RNA	RNA	RNA	RNA	RNA	RNA	RNA	RNA	RNA	RNA	RNA	RNA	RNA	RNA	RNA	RNA	RNA	RNA	RNA	RNA	RNA	RNA	RNA	RNA	RNA	RNA	RNA	RNA	RNA	RNA	RNA	RNA	RNA	RNA
!Sample_channel_count	1	1	1	1	1	1	1	1	1	1	1	1	1	1	1	1	1	1	1	1	1	1	1	1	1	1	1	1	1	1	1	1	1	1	1	1	1	1	1	1	1	1	1	1	1	1	1	1	1
!Sample_source_name_ch1	Laser capture miscrodissected astrocytes from human PSND brain tissue	Laser capture miscrodissected astrocytes from human PSD brain tissue	Laser capture miscrodissected astrocytes from human PSD brain tissue	Laser capture miscrodissected astrocytes from human control brain tissue	Laser capture miscrodissected astrocytes from human PSD brain tissue	Laser capture miscrodissected astrocytes from human PSND brain tissue	Laser capture miscrodissected astrocytes from human control brain tissue	Laser capture miscrodissected astrocytes from human control brain tissue	Laser capture miscrodissected astrocytes from human control brain tissue	Laser capture miscrodissected astrocytes from human PSD brain tissue	Laser capture miscrodissected astrocytes from human PSND brain tissue	Laser capture miscrodissected astrocytes from human PSND brain tissue	Laser capture miscrodissected astrocytes from human PSND brain tissue	Laser capture miscrodissected astrocytes from human PSND brain tissue	Laser capture miscrodissected astrocytes from human PSD brain tissue	Laser capture miscrodissected astrocytes from human control brain tissue	Laser capture miscrodissected astrocytes from human PSD brain tissue	Laser capture miscrodissected astrocytes from human control brain tissue	Laser capture miscrodissected astrocytes from human PSD brain tissue	Laser capture miscrodissected astrocytes from human PSND brain tissue	Laser capture miscrodissected astrocytes from human PSD brain tissue	Laser capture miscrodissected astrocytes from human control brain tissue	Laser capture miscrodissected astrocytes from human PSND brain tissue	Laser capture miscrodissected astrocytes from human control brain tissue	Laser capture miscrodissected astrocytes from human control brain tissue	Laser capture miscrodissected astrocytes from human PSD brain tissue	Laser capture miscrodissected astrocytes from human control brain tissue	Laser capture miscrodissected astrocytes from human PSD brain tissue	Laser capture miscrodissected astrocytes from human PSND brain tissue	Laser capture miscrodissected astrocytes from human PSND brain tissue	Laser capture miscrodissected neurons from human PSND brain tissue	Laser capture miscrodissected neurons from human PSD brain tissue	Laser capture miscrodissected neurons from human PSD brain tissue	Laser capture miscrodissected neurons from human control brain tissue	Laser capture miscrodissected neurons from human PSD brain tissue	Laser capture miscrodissected neurons from human PSND brain tissue	Laser capture miscrodissected neurons from human control brain tissue	Laser capture miscrodissected neurons from human control brain tissue	Laser capture miscrodissected neurons from human control brain tissue	Laser capture miscrodissected neurons from human PSD brain tissue	Laser capture miscrodissected neurons from human PSND brain tissue	Laser capture miscrodissected neurons from human PSND brain tissue	Laser capture miscrodissected neurons from human PSND brain tissue	Laser capture miscrodissected neurons from human PSND brain tissue	Laser capture miscrodissected neurons from human PSD brain tissue	Laser capture miscrodissected neurons from human control brain tissue	Laser capture miscrodissected neurons from human PSD brain tissue	Laser capture miscrodissected neurons from human control brain tissue	Laser capture miscrodissected neurons from human PSD brain tissue
!Sample_organism_ch1	Homo sapiens	Homo sapiens	Homo sapiens	Homo sapiens	Homo sapiens	Homo sapiens	Homo sapiens	Homo sapiens	Homo sapiens	Homo sapiens	Homo sapiens	Homo sapiens	Homo sapiens	Homo sapiens	Homo sapiens	Homo sapiens	Homo sapiens	Homo sapiens	Homo sapiens	Homo sapiens	Homo sapiens	Homo sapiens	Homo sapiens	Homo sapiens	Homo sapiens	Homo sapiens	Homo sapiens	Homo sapiens	Homo sapiens	Homo sapiens	Homo sapiens	Homo sapiens	Homo sapiens	Homo sapiens	Homo sapiens	Homo sapiens	Homo sapiens	Homo sapiens	Homo sapiens	Homo sapiens	Homo sapiens	Homo sapiens	Homo sapiens	Homo sapiens	Homo sapiens	Homo sapiens	Homo sapiens	Homo sapiens	Homo sapiens
!Sample_characteristics_ch1	gender: F	gender: M	gender: F	gender: M	gender: F	gender: M	gender: F	gender: M	gender: F	gender: M	gender: M	gender: F	gender: M	gender: F	gender: M	gender: F	gender: M	gender: F	gender: M	gender: M	gender: F	gender: F	gender: F	gender: F	gender: F	gender: M	gender: F	gender: F	gender: F	gender: M	gender: F	gender: M	gender: F	gender: M	gender: F	gender: M	gender: F	gender: M	gender: F	gender: M	gender: M	gender: F	gender: M	gender: F	gender: M	gender: F	gender: M	gender: F	gender: M
!Sample_characteristics_ch1	condition: PSND	condition: PSD	condition: PSD	condition: Control	condition: PSD	condition: PSND	condition: Control	condition: Control	condition: Control	condition: PSD	condition: PSND	condition: PSND	condition: PSND	condition: PSND	condition: PSD	condition: Control	condition: PSD	condition: Control	condition: PSD	condition: PSND	condition: PSD	condition: Control	condition: PSND	condition: Control	condition: Control	condition: PSD	condition: Control	condition: PSD	condition: PSND	condition: PSND	condition: PSND	condition: PSD	condition: PSD	condition: Control	condition: PSD	condition: PSND	condition: Control	condition: Control	condition: Control	condition: PSD	condition: PSND	condition: PSND	condition: PSND	condition: PSND	condition: PSD	condition: Control	condition: PSD	condition: Control	condition: PSD
!Sample_treatment_protocol_ch1	Toluidine blue histologically stained pyramidal neurons, glial fibrillary acidic protein-positive (GFAP+)- astrocytes and collagen IV-positive (Coll-IV+)- endothelial cells were isolated from each human case (PSD, PSND and Control) using a PixCell II laser capture microdissection (LCM) system. Toluidine blue histologically stained pyramidal neurons were isolated from each mouse case (BCAS and SHA…	Toluidine blue histologically stained pyramidal neurons, glial fibrillary acidic protein-positive (GFAP+)- astrocytes and collagen IV-positive (Coll-IV+)- endothelial cells were isolated from each human case (PSD, PSND and Control) using a PixCell II laser capture microdissection (LCM) system. Toluidine blue histologically stained pyramidal neurons were isolated from each mouse case (BCAS and SHA…	Toluidine blue histologically stained pyramidal neurons, glial fibrillary acidic protein-positive (GFAP+)- astrocytes and collagen IV-positive (Coll-IV+)- endothelial cells were isolated from each human case (PSD, PSND and Control) using a PixCell II laser capture microdissection (LCM) system. Toluidine blue histologically stained pyramidal neurons were isolated from each mouse case (BCAS and SHA…	Toluidine blue histologically stained pyramidal neurons, glial fibrillary acidic protein-positive (GFAP+)- astrocytes and collagen IV-positive (Coll-IV+)- endothelial cells were isolated from each human case (PSD, PSND and Control) using a PixCell II laser capture microdissection (LCM) system. Toluidine blue histologically stained pyramidal neurons were isolated from each mouse case (BCAS and SHA…	Toluidine blue histologically stained pyramidal neurons, glial fibrillary acidic protein-positive (GFAP+)- astrocytes and collagen IV-positive (Coll-IV+)- endothelial cells were isolated from each human case (PSD, PSND and Control) using a PixCell II laser capture microdissection (LCM) system. Toluidine blue histologically stained pyramidal neurons were isolated from each mouse case (BCAS and SHA…	Toluidine blue histologically stained pyramidal neurons, glial fibrillary acidic protein-positive (GFAP+)- astrocytes and collagen IV-positive (Coll-IV+)- endothelial cells were isolated from each human case (PSD, PSND and Control) using a PixCell II laser capture microdissection (LCM) system. Toluidine blue histologically stained pyramidal neurons were isolated from each mouse case (BCAS and SHA…	Toluidine blue histologically stained pyramidal neurons, glial fibrillary acidic protein-positive (GFAP+)- astrocytes and collagen IV-positive (Coll-IV+)- endothelial cells were isolated from each human case (PSD, PSND and Control) using a PixCell II laser capture microdissection (LCM) system. Toluidine blue histologically stained pyramidal neurons were isolated from each mouse case (BCAS and SHA…	Toluidine blue histologically stained pyramidal neurons, glial fibrillary acidic protein-positive (GFAP+)- astrocytes and collagen IV-positive (Coll-IV+)- endothelial cells were isolated from each human case (PSD, PSND and Control) using a PixCell II laser capture microdissection (LCM) system. Toluidine blue histologically stained pyramidal neurons were isolated from each mouse case (BCAS and SHA…	Toluidine blue histologically stained pyramidal neurons, glial fibrillary acidic protein-positive (GFAP+)- astrocytes and collagen IV-positive (Coll-IV+)- endothelial cells were isolated from each human case (PSD, PSND and Control) using a PixCell II laser capture microdissection (LCM) system. Toluidine blue histologically stained pyramidal neurons were isolated from each mouse case (BCAS and SHA…	Toluidine blue histologically stained pyramidal neurons, glial fibrillary acidic protein-positive (GFAP+)- astrocytes and collagen IV-positive (Coll-IV+)- endothelial cells were isolated from each human case (PSD, PSND and Control) using a PixCell II laser capture microdissection (LCM) system. Toluidine blue histologically stained pyramidal neurons were isolated from each mouse case (BCAS and SHA…	Toluidine blue histologically stained pyramidal neurons, glial fibrillary acidic protein-positive (GFAP+)- astrocytes and collagen IV-positive (Coll-IV+)- endothelial cells were isolated from each human case (PSD, PSND and Control) using a PixCell II laser capture microdissection (LCM) system. Toluidine blue histologically stained pyramidal neurons were isolated from each mouse case (BCAS and SHA…	Toluidine blue histologically stained pyramidal neurons, glial fibrillary acidic protein-positive (GFAP+)- astrocytes and collagen IV-positive (Coll-IV+)- endothelial cells were isolated from each human case (PSD, PSND and Control) using a PixCell II laser capture microdissection (LCM) system. Toluidine blue histologically stained pyramidal neurons were isolated from each mouse case (BCAS and SHA…	Toluidine blue histologically stained pyramidal neurons, glial fibrillary acidic protein-positive (GFAP+)- astrocytes and collagen IV-positive (Coll-IV+)- endothelial cells were isolated from each human case (PSD, PSND and Control) using a PixCell II laser capture microdissection (LCM) system. Toluidine blue histologically stained pyramidal neurons were isolated from each mouse case (BCAS and SHA…	Toluidine blue histologically stained pyramidal neurons, glial fibrillary acidic protein-positive (GFAP+)- astrocytes and collagen IV-positive (Coll-IV+)- endothelial cells were isolated from each human case (PSD, PSND and Control) using a PixCell II laser capture microdissection (LCM) system. Toluidine blue histologically stained pyramidal neurons were isolated from each mouse case (BCAS and SHA…	Toluidine blue histologically stained pyramidal neurons, glial fibrillary acidic protein-positive (GFAP+)- astrocytes and collagen IV-positive (Coll-IV+)- endothelial cells were isolated from each human case (PSD, PSND and Control) using a PixCell II laser capture microdissection (LCM) system. Toluidine blue histologically stained pyramidal neurons were isolated from each mouse case (BCAS and SHA…	Toluidine blue histologically stained pyramidal neurons, glial fibrillary acidic protein-positive (GFAP+)- astrocytes and collagen IV-positive (Coll-IV+)- endothelial cells were isolated from each human case (PSD, PSND and Control) using a PixCell II laser capture microdissection (LCM) system. Toluidine blue histologically stained pyramidal neurons were isolated from each mouse case (BCAS and SHA…	Toluidine blue histologically stained pyramidal neurons, glial fibrillary acidic protein-positive (GFAP+)- astrocytes and collagen IV-positive (Coll-IV+)- endothelial cells were isolated from each human case (PSD, PSND and Control) using a PixCell II laser capture microdissection (LCM) system. Toluidine blue histologically stained pyramidal neurons were isolated from each mouse case (BCAS and SHA…	Toluidine blue histologically stained pyramidal neurons, glial fibrillary acidic protein-positive (GFAP+)- astrocytes and collagen IV-positive (Coll-IV+)- endothelial cells were isolated from each human case (PSD, PSND and Control) using a PixCell II laser capture microdissection (LCM) system. Toluidine blue histologically stained pyramidal neurons were isolated from each mouse case (BCAS and SHA…	Toluidine blue histologically stained pyramidal neurons, glial fibrillary acidic protein-positive (GFAP+)- astrocytes and collagen IV-positive (Coll-IV+)- endothelial cells were isolated from each human case (PSD, PSND and Control) using a PixCell II laser capture microdissection (LCM) system. Toluidine blue histologically stained pyramidal neurons were isolated from each mouse case (BCAS and SHA…	Toluidine blue histologically stained pyramidal neurons, glial fibrillary acidic protein-positive (GFAP+)- astrocytes and collagen IV-positive (Coll-IV+)- endothelial cells were isolated from each human case (PSD, PSND and Control) using a PixCell II laser capture microdissection (LCM) system. Toluidine blue histologically stained pyramidal neurons were isolated from each mouse case (BCAS and SHA…	Toluidine blue histologically stained pyramidal neurons, glial fibrillary acidic protein-positive (GFAP+)- astrocytes and collagen IV-positive (Coll-IV+)- endothelial cells were isolated from each human case (PSD, PSND and Control) using a PixCell II laser capture microdissection (LCM) system. Toluidine blue histologically stained pyramidal neurons were isolated from each mouse case (BCAS and SHA…	Toluidine blue histologically stained pyramidal neurons, glial fibrillary acidic protein-positive (GFAP+)- astrocytes and collagen IV-positive (Coll-IV+)- endothelial cells were isolated from each human case (PSD, PSND and Control) using a PixCell II laser capture microdissection (LCM) system. Toluidine blue histologically stained pyramidal neurons were isolated from each mouse case (BCAS and SHA…	Toluidine blue histologically stained pyramidal neurons, glial fibrillary acidic protein-positive (GFAP+)- astrocytes and collagen IV-positive (Coll-IV+)- endothelial cells were isolated from each human case (PSD, PSND and Control) using a PixCell II laser capture microdissection (LCM) system. Toluidine blue histologically stained pyramidal neurons were isolated from each mouse case (BCAS and SHA…	Toluidine blue histologically stained pyramidal neurons, glial fibrillary acidic protein-positive (GFAP+)- astrocytes and collagen IV-positive (Coll-IV+)- endothelial cells were isolated from each human case (PSD, PSND and Control) using a PixCell II laser capture microdissection (LCM) system. Toluidine blue histologically stained pyramidal neurons were isolated from each mouse case (BCAS and SHA…	Toluidine blue histologically stained pyramidal neurons, glial fibrillary acidic protein-positive (GFAP+)- astrocytes and collagen IV-positive (Coll-IV+)- endothelial cells were isolated from each human case (PSD, PSND and Control) using a PixCell II laser capture microdissection (LCM) system. Toluidine blue histologically stained pyramidal neurons were isolated from each mouse case (BCAS and SHA…	Toluidine blue histologically stained pyramidal neurons, glial fibrillary acidic protein-positive (GFAP+)- astrocytes and collagen IV-positive (Coll-IV+)- endothelial cells were isolated from each human case (PSD, PSND and Control) using a PixCell II laser capture microdissection (LCM) system. Toluidine blue histologically stained pyramidal neurons were isolated from each mouse case (BCAS and SHA…	Toluidine blue histologically stained pyramidal neurons, glial fibrillary acidic protein-positive (GFAP+)- astrocytes and collagen IV-positive (Coll-IV+)- endothelial cells were isolated from each human case (PSD, PSND and Control) using a PixCell II laser capture microdissection (LCM) system. Toluidine blue histologically stained pyramidal neurons were isolated from each mouse case (BCAS and SHA…	Toluidine blue histologically stained pyramidal neurons, glial fibrillary acidic protein-positive (GFAP+)- astrocytes and collagen IV-positive (Coll-IV+)- endothelial cells were isolated from each human case (PSD, PSND and Control) using a PixCell II laser capture microdissection (LCM) system. Toluidine blue histologically stained pyramidal neurons were isolated from each mouse case (BCAS and SHA…	Toluidine blue histologically stained pyramidal neurons, glial fibrillary acidic protein-positive (GFAP+)- astrocytes and collagen IV-positive (Coll-IV+)- endothelial cells were isolated from each human case (PSD, PSND and Control) using a PixCell II laser capture microdissection (LCM) system. Toluidine blue histologically stained pyramidal neurons were isolated from each mouse case (BCAS and SHA…	Toluidine blue histologically stained pyramidal neurons, glial fibrillary acidic protein-positive (GFAP+)- astrocytes and collagen IV-positive (Coll-IV+)- endothelial cells were isolated from each human case (PSD, PSND and Control) using a PixCell II laser capture microdissection (LCM) system. Toluidine blue histologically stained pyramidal neurons were isolated from each mouse case (BCAS and SHA…	Toluidine blue histologically stained pyramidal neurons, glial fibrillary acidic protein-positive (GFAP+)- astrocytes and collagen IV-positive (Coll-IV+)- endothelial cells were isolated from each human case (PSD, PSND and Control) using a PixCell II laser capture microdissection (LCM) system. Toluidine blue histologically stained pyramidal neurons were isolated from each mouse case (BCAS and SHA…	Toluidine blue histologically stained pyramidal neurons, glial fibrillary acidic protein-positive (GFAP+)- astrocytes and collagen IV-positive (Coll-IV+)- endothelial cells were isolated from each human case (PSD, PSND and Control) using a PixCell II laser capture microdissection (LCM) system. Toluidine blue histologically stained pyramidal neurons were isolated from each mouse case (BCAS and SHA…	Toluidine blue histologically stained pyramidal neurons, glial fibrillary acidic protein-positive (GFAP+)- astrocytes and collagen IV-positive (Coll-IV+)- endothelial cells were isolated from each human case (PSD, PSND and Control) using a PixCell II laser capture microdissection (LCM) system. Toluidine blue histologically stained pyramidal neurons were isolated from each mouse case (BCAS and SHA…	Toluidine blue histologically stained pyramidal neurons, glial fibrillary acidic protein-positive (GFAP+)- astrocytes and collagen IV-positive (Coll-IV+)- endothelial cells were isolated from each human case (PSD, PSND and Control) using a PixCell II laser capture microdissection (LCM) system. Toluidine blue histologically stained pyramidal neurons were isolated from each mouse case (BCAS and SHA…	Toluidine blue histologically stained pyramidal neurons, glial fibrillary acidic protein-positive (GFAP+)- astrocytes and collagen IV-positive (Coll-IV+)- endothelial cells were isolated from each human case (PSD, PSND and Control) using a PixCell II laser capture microdissection (LCM) system. Toluidine blue histologically stained pyramidal neurons were isolated from each mouse case (BCAS and SHA…	Toluidine blue histologically stained pyramidal neurons, glial fibrillary acidic protein-positive (GFAP+)- astrocytes and collagen IV-positive (Coll-IV+)- endothelial cells were isolated from each human case (PSD, PSND and Control) using a PixCell II laser capture microdissection (LCM) system. Toluidine blue histologically stained pyramidal neurons were isolated from each mouse case (BCAS and SHA…	Toluidine blue histologically stained pyramidal neurons, glial fibrillary acidic protein-positive (GFAP+)- astrocytes and collagen IV-positive (Coll-IV+)- endothelial cells were isolated from each human case (PSD, PSND and Control) using a PixCell II laser capture microdissection (LCM) system. Toluidine blue histologically stained pyramidal neurons were isolated from each mouse case (BCAS and SHA…	Toluidine blue histologically stained pyramidal neurons, glial fibrillary acidic protein-positive (GFAP+)- astrocytes and collagen IV-positive (Coll-IV+)- endothelial cells were isolated from each human case (PSD, PSND and Control) using a PixCell II laser capture microdissection (LCM) system. Toluidine blue histologically stained pyramidal neurons were isolated from each mouse case (BCAS and SHA…	Toluidine blue histologically stained pyramidal neurons, glial fibrillary acidic protein-positive (GFAP+)- astrocytes and collagen IV-positive (Coll-IV+)- endothelial cells were isolated from each human case (PSD, PSND and Control) using a PixCell II laser capture microdissection (LCM) system. Toluidine blue histologically stained pyramidal neurons were isolated from each mouse case (BCAS and SHA…	Toluidine blue histologically stained pyramidal neurons, glial fibrillary acidic protein-positive (GFAP+)- astrocytes and collagen IV-positive (Coll-IV+)- endothelial cells were isolated from each human case (PSD, PSND and Control) using a PixCell II laser capture microdissection (LCM) system. Toluidine blue histologically stained pyramidal neurons were isolated from each mouse case (BCAS and SHA…	Toluidine blue histologically stained pyramidal neurons, glial fibrillary acidic protein-positive (GFAP+)- astrocytes and collagen IV-positive (Coll-IV+)- endothelial cells were isolated from each human case (PSD, PSND and Control) using a PixCell II laser capture microdissection (LCM) system. Toluidine blue histologically stained pyramidal neurons were isolated from each mouse case (BCAS and SHA…	Toluidine blue histologically stained pyramidal neurons, glial fibrillary acidic protein-positive (GFAP+)- astrocytes and collagen IV-positive (Coll-IV+)- endothelial cells were isolated from each human case (PSD, PSND and Control) using a PixCell II laser capture microdissection (LCM) system. Toluidine blue histologically stained pyramidal neurons were isolated from each mouse case (BCAS and SHA…	Toluidine blue histologically stained pyramidal neurons, glial fibrillary acidic protein-positive (GFAP+)- astrocytes and collagen IV-positive (Coll-IV+)- endothelial cells were isolated from each human case (PSD, PSND and Control) using a PixCell II laser capture microdissection (LCM) system. Toluidine blue histologically stained pyramidal neurons were isolated from each mouse case (BCAS and SHA…	Toluidine blue histologically stained pyramidal neurons, glial fibrillary acidic protein-positive (GFAP+)- astrocytes and collagen IV-positive (Coll-IV+)- endothelial cells were isolated from each human case (PSD, PSND and Control) using a PixCell II laser capture microdissection (LCM) system. Toluidine blue histologically stained pyramidal neurons were isolated from each mouse case (BCAS and SHA…	Toluidine blue histologically stained pyramidal neurons, glial fibrillary acidic protein-positive (GFAP+)- astrocytes and collagen IV-positive (Coll-IV+)- endothelial cells were isolated from each human case (PSD, PSND and Control) using a PixCell II laser capture microdissection (LCM) system. Toluidine blue histologically stained pyramidal neurons were isolated from each mouse case (BCAS and SHA…	Toluidine blue histologically stained pyramidal neurons, glial fibrillary acidic protein-positive (GFAP+)- astrocytes and collagen IV-positive (Coll-IV+)- endothelial cells were isolated from each human case (PSD, PSND and Control) using a PixCell II laser capture microdissection (LCM) system. Toluidine blue histologically stained pyramidal neurons were isolated from each mouse case (BCAS and SHA…	Toluidine blue histologically stained pyramidal neurons, glial fibrillary acidic protein-positive (GFAP+)- astrocytes and collagen IV-positive (Coll-IV+)- endothelial cells were isolated from each human case (PSD, PSND and Control) using a PixCell II laser capture microdissection (LCM) system. Toluidine blue histologically stained pyramidal neurons were isolated from each mouse case (BCAS and SHA…	Toluidine blue histologically stained pyramidal neurons, glial fibrillary acidic protein-positive (GFAP+)- astrocytes and collagen IV-positive (Coll-IV+)- endothelial cells were isolated from each human case (PSD, PSND and Control) using a PixCell II laser capture microdissection (LCM) system. Toluidine blue histologically stained pyramidal neurons were isolated from each mouse case (BCAS and SHA…	Toluidine blue histologically stained pyramidal neurons, glial fibrillary acidic protein-positive (GFAP+)- astrocytes and collagen IV-positive (Coll-IV+)- endothelial cells were isolated from each human case (PSD, PSND and Control) using a PixCell II laser capture microdissection (LCM) system. Toluidine blue histologically stained pyramidal neurons were isolated from each mouse case (BCAS and SHA…
!Sample_growth_protocol_ch1	All samples were snap frozen and stored at -80掳C	All samples were snap frozen and stored at -80掳C	All samples were snap frozen and stored at -80掳C	All samples were snap frozen and stored at -80掳C	All samples were snap frozen and stored at -80掳C	All samples were snap frozen and stored at -80掳C	All samples were snap frozen and stored at -80掳C	All samples were snap frozen and stored at -80掳C	All samples were snap frozen and stored at -80掳C	All samples were snap frozen and stored at -80掳C	All samples were snap frozen and stored at -80掳C	All samples were snap frozen and stored at -80掳C	All samples were snap frozen and stored at -80掳C	All samples were snap frozen and stored at -80掳C	All samples were snap frozen and stored at -80掳C	All samples were snap frozen and stored at -80掳C	All samples were snap frozen and stored at -80掳C	All samples were snap frozen and stored at -80掳C	All samples were snap frozen and stored at -80掳C	All samples were snap frozen and stored at -80掳C	All samples were snap frozen and stored at -80掳C	All samples were snap frozen and stored at -80掳C	All samples were snap frozen and stored at -80掳C	All samples were snap frozen and stored at -80掳C	All samples were snap frozen and stored at -80掳C	All samples were snap frozen and stored at -80掳C	All samples were snap frozen and stored at -80掳C	All samples were snap frozen and stored at -80掳C	All samples were snap frozen and stored at -80掳C	All samples were snap frozen and stored at -80掳C	All samples were snap frozen and stored at -80掳C	All samples were snap frozen and stored at -80掳C	All samples were snap frozen and stored at -80掳C	All samples were snap frozen and stored at -80掳C	All samples were snap frozen and stored at -80掳C	All samples were snap frozen and stored at -80掳C	All samples were snap frozen and stored at -80掳C	All samples were snap frozen and stored at -80掳C	All samples were snap frozen and stored at -80掳C	All samples were snap frozen and stored at -80掳C	All samples were snap frozen and stored at -80掳C	All samples were snap frozen and stored at -80掳C	All samples were snap frozen and stored at -80掳C	All samples were snap frozen and stored at -80掳C	All samples were snap frozen and stored at -80掳C	All samples were snap frozen and stored at -80掳C	All samples were snap frozen and stored at -80掳C	All samples were snap frozen and stored at -80掳C	All samples were snap frozen and stored at -80掳C
!Sample_molecule_ch1	total RNA	total RNA	total RNA	total RNA	total RNA	total RNA	total RNA	total RNA	total RNA	total RNA	total RNA	total RNA	total RNA	total RNA	total RNA	total RNA	total RNA	total RNA	total RNA	total RNA	total RNA	total RNA	total RNA	total RNA	total RNA	total RNA	total RNA	total RNA	total RNA	total RNA	total RNA	total RNA	total RNA	total RNA	total RNA	total RNA	total RNA	total RNA	total RNA	total RNA	total RNA	total RNA	total RNA	total RNA	total RNA	total RNA	total RNA	total RNA	total RNA
!Sample_extract_protocol_ch1	Total RNA was extracted from each isolated group of cells using the PicoPure RNA isolation kit	Total RNA was extracted from each isolated group of cells using the PicoPure RNA isolation kit	Total RNA was extracted from each isolated group of cells using the PicoPure RNA isolation kit	Total RNA was extracted from each isolated group of cells using the PicoPure RNA isolation kit	Total RNA was extracted from each isolated group of cells using the PicoPure RNA isolation kit	Total RNA was extracted from each isolated group of cells using the PicoPure RNA isolation kit	Total RNA was extracted from each isolated group of cells using the PicoPure RNA isolation kit	Total RNA was extracted from each isolated group of cells using the PicoPure RNA isolation kit	Total RNA was extracted from each isolated group of cells using the PicoPure RNA isolation kit	Total RNA was extracted from each isolated group of cells using the PicoPure RNA isolation kit	Total RNA was extracted from each isolated group of cells using the PicoPure RNA isolation kit	Total RNA was extracted from each isolated group of cells using the PicoPure RNA isolation kit	Total RNA was extracted from each isolated group of cells using the PicoPure RNA isolation kit	Total RNA was extracted from each isolated group of cells using the PicoPure RNA isolation kit	Total RNA was extracted from each isolated group of cells using the PicoPure RNA isolation kit	Total RNA was extracted from each isolated group of cells using the PicoPure RNA isolation kit	Total RNA was extracted from each isolated group of cells using the PicoPure RNA isolation kit	Total RNA was extracted from each isolated group of cells using the PicoPure RNA isolation kit	Total RNA was extracted from each isolated group of cells using the PicoPure RNA isolation kit	Total RNA was extracted from each isolated group of cells using the PicoPure RNA isolation kit	Total RNA was extracted from each isolated group of cells using the PicoPure RNA isolation kit	Total RNA was extracted from each isolated group of cells using the PicoPure RNA isolation kit	Total RNA was extracted from each isolated group of cells using the PicoPure RNA isolation kit	Total RNA was extracted from each isolated group of cells using the PicoPure RNA isolation kit	Total RNA was extracted from each isolated group of cells using the PicoPure RNA isolation kit	Total RNA was extracted from each isolated group of cells using the PicoPure RNA isolation kit	Total RNA was extracted from each isolated group of cells using the PicoPure RNA isolation kit	Total RNA was extracted from each isolated group of cells using the PicoPure RNA isolation kit	Total RNA was extracted from each isolated group of cells using the PicoPure RNA isolation kit	Total RNA was extracted from each isolated group of cells using the PicoPure RNA isolation kit	Total RNA was extracted from each isolated group of cells using the PicoPure RNA isolation kit	Total RNA was extracted from each isolated group of cells using the PicoPure RNA isolation kit	Total RNA was extracted from each isolated group of cells using the PicoPure RNA isolation kit	Total RNA was extracted from each isolated group of cells using the PicoPure RNA isolation kit	Total RNA was extracted from each isolated group of cells using the PicoPure RNA isolation kit	Total RNA was extracted from each isolated group of cells using the PicoPure RNA isolation kit	Total RNA was extracted from each isolated group of cells using the PicoPure RNA isolation kit	Total RNA was extracted from each isolated group of cells using the PicoPure RNA isolation kit	Total RNA was extracted from each isolated group of cells using the PicoPure RNA isolation kit	Total RNA was extracted from each isolated group of cells using the PicoPure RNA isolation kit	Total RNA was extracted from each isolated group of cells using the PicoPure RNA isolation kit	Total RNA was extracted from each isolated group of cells using the PicoPure RNA isolation kit	Total RNA was extracted from each isolated group of cells using the PicoPure RNA isolation kit	Total RNA was extracted from each isolated group of cells using the PicoPure RNA isolation kit	Total RNA was extracted from each isolated group of cells using the PicoPure RNA isolation kit	Total RNA was extracted from each isolated group of cells using the PicoPure RNA isolation kit	Total RNA was extracted from each isolated group of cells using the PicoPure RNA isolation kit	Total RNA was extracted from each isolated group of cells using the PicoPure RNA isolation kit	Total RNA was extracted from each isolated group of cells using the PicoPure RNA isolation kit
!Sample_label_ch1	Biotin	Biotin	Biotin	Biotin	Biotin	Biotin	Biotin	Biotin	Biotin	Biotin	Biotin	Biotin	Biotin	Biotin	Biotin	Biotin	Biotin	Biotin	Biotin	Biotin	Biotin	Biotin	Biotin	Biotin	Biotin	Biotin	Biotin	Biotin	Biotin	Biotin	Biotin	Biotin	Biotin	Biotin	Biotin	Biotin	Biotin	Biotin	Biotin	Biotin	Biotin	Biotin	Biotin	Biotin	Biotin	Biotin	Biotin	Biotin	Biotin
!Sample_label_protocol_ch1	Target labelled mRNA was prepared following the GeneChip WT Pico amplification protocol (Affymetrix). RNA amplification was achieved using low-cycle PCR followed by amplification using T7 in vitro transcription. The cRNA was converted to biotinylated sense-strand DNA hybridisation targets.	Target labelled mRNA was prepared following the GeneChip WT Pico amplification protocol (Affymetrix). RNA amplification was achieved using low-cycle PCR followed by amplification using T7 in vitro transcription. The cRNA was converted to biotinylated sense-strand DNA hybridisation targets.	Target labelled mRNA was prepared following the GeneChip WT Pico amplification protocol (Affymetrix). RNA amplification was achieved using low-cycle PCR followed by amplification using T7 in vitro transcription. The cRNA was converted to biotinylated sense-strand DNA hybridisation targets.	Target labelled mRNA was prepared following the GeneChip WT Pico amplification protocol (Affymetrix). RNA amplification was achieved using low-cycle PCR followed by amplification using T7 in vitro transcription. The cRNA was converted to biotinylated sense-strand DNA hybridisation targets.	Target labelled mRNA was prepared following the GeneChip WT Pico amplification protocol (Affymetrix). RNA amplification was achieved using low-cycle PCR followed by amplification using T7 in vitro transcription. The cRNA was converted to biotinylated sense-strand DNA hybridisation targets.	Target labelled mRNA was prepared following the GeneChip WT Pico amplification protocol (Affymetrix). RNA amplification was achieved using low-cycle PCR followed by amplification using T7 in vitro transcription. The cRNA was converted to biotinylated sense-strand DNA hybridisation targets.	Target labelled mRNA was prepared following the GeneChip WT Pico amplification protocol (Affymetrix). RNA amplification was achieved using low-cycle PCR followed by amplification using T7 in vitro transcription. The cRNA was converted to biotinylated sense-strand DNA hybridisation targets.	Target labelled mRNA was prepared following the GeneChip WT Pico amplification protocol (Affymetrix). RNA amplification was achieved using low-cycle PCR followed by amplification using T7 in vitro transcription. The cRNA was converted to biotinylated sense-strand DNA hybridisation targets.	Target labelled mRNA was prepared following the GeneChip WT Pico amplification protocol (Affymetrix). RNA amplification was achieved using low-cycle PCR followed by amplification using T7 in vitro transcription. The cRNA was converted to biotinylated sense-strand DNA hybridisation targets.	Target labelled mRNA was prepared following the GeneChip WT Pico amplification protocol (Affymetrix). RNA amplification was achieved using low-cycle PCR followed by amplification using T7 in vitro transcription. The cRNA was converted to biotinylated sense-strand DNA hybridisation targets.	Target labelled mRNA was prepared following the GeneChip WT Pico amplification protocol (Affymetrix). RNA amplification was achieved using low-cycle PCR followed by amplification using T7 in vitro transcription. The cRNA was converted to biotinylated sense-strand DNA hybridisation targets.	Target labelled mRNA was prepared following the GeneChip WT Pico amplification protocol (Affymetrix). RNA amplification was achieved using low-cycle PCR followed by amplification using T7 in vitro transcription. The cRNA was converted to biotinylated sense-strand DNA hybridisation targets.	Target labelled mRNA was prepared following the GeneChip WT Pico amplification protocol (Affymetrix). RNA amplification was achieved using low-cycle PCR followed by amplification using T7 in vitro transcription. The cRNA was converted to biotinylated sense-strand DNA hybridisation targets.	Target labelled mRNA was prepared following the GeneChip WT Pico amplification protocol (Affymetrix). RNA amplification was achieved using low-cycle PCR followed by amplification using T7 in vitro transcription. The cRNA was converted to biotinylated sense-strand DNA hybridisation targets.	Target labelled mRNA was prepared following the GeneChip WT Pico amplification protocol (Affymetrix). RNA amplification was achieved using low-cycle PCR followed by amplification using T7 in vitro transcription. The cRNA was converted to biotinylated sense-strand DNA hybridisation targets.	Target labelled mRNA was prepared following the GeneChip WT Pico amplification protocol (Affymetrix). RNA amplification was achieved using low-cycle PCR followed by amplification using T7 in vitro transcription. The cRNA was converted to biotinylated sense-strand DNA hybridisation targets.	Target labelled mRNA was prepared following the GeneChip WT Pico amplification protocol (Affymetrix). RNA amplification was achieved using low-cycle PCR followed by amplification using T7 in vitro transcription. The cRNA was converted to biotinylated sense-strand DNA hybridisation targets.	Target labelled mRNA was prepared following the GeneChip WT Pico amplification protocol (Affymetrix). RNA amplification was achieved using low-cycle PCR followed by amplification using T7 in vitro transcription. The cRNA was converted to biotinylated sense-strand DNA hybridisation targets.	Target labelled mRNA was prepared following the GeneChip WT Pico amplification protocol (Affymetrix). RNA amplification was achieved using low-cycle PCR followed by amplification using T7 in vitro transcription. The cRNA was converted to biotinylated sense-strand DNA hybridisation targets.	Target labelled mRNA was prepared following the GeneChip WT Pico amplification protocol (Affymetrix). RNA amplification was achieved using low-cycle PCR followed by amplification using T7 in vitro transcription. The cRNA was converted to biotinylated sense-strand DNA hybridisation targets.	Target labelled mRNA was prepared following the GeneChip WT Pico amplification protocol (Affymetrix). RNA amplification was achieved using low-cycle PCR followed by amplification using T7 in vitro transcription. The cRNA was converted to biotinylated sense-strand DNA hybridisation targets.	Target labelled mRNA was prepared following the GeneChip WT Pico amplification protocol (Affymetrix). RNA amplification was achieved using low-cycle PCR followed by amplification using T7 in vitro transcription. The cRNA was converted to biotinylated sense-strand DNA hybridisation targets.	Target labelled mRNA was prepared following the GeneChip WT Pico amplification protocol (Affymetrix). RNA amplification was achieved using low-cycle PCR followed by amplification using T7 in vitro transcription. The cRNA was converted to biotinylated sense-strand DNA hybridisation targets.	Target labelled mRNA was prepared following the GeneChip WT Pico amplification protocol (Affymetrix). RNA amplification was achieved using low-cycle PCR followed by amplification using T7 in vitro transcription. The cRNA was converted to biotinylated sense-strand DNA hybridisation targets.	Target labelled mRNA was prepared following the GeneChip WT Pico amplification protocol (Affymetrix). RNA amplification was achieved using low-cycle PCR followed by amplification using T7 in vitro transcription. The cRNA was converted to biotinylated sense-strand DNA hybridisation targets.	Target labelled mRNA was prepared following the GeneChip WT Pico amplification protocol (Affymetrix). RNA amplification was achieved using low-cycle PCR followed by amplification using T7 in vitro transcription. The cRNA was converted to biotinylated sense-strand DNA hybridisation targets.	Target labelled mRNA was prepared following the GeneChip WT Pico amplification protocol (Affymetrix). RNA amplification was achieved using low-cycle PCR followed by amplification using T7 in vitro transcription. The cRNA was converted to biotinylated sense-strand DNA hybridisation targets.	Target labelled mRNA was prepared following the GeneChip WT Pico amplification protocol (Affymetrix). RNA amplification was achieved using low-cycle PCR followed by amplification using T7 in vitro transcription. The cRNA was converted to biotinylated sense-strand DNA hybridisation targets.	Target labelled mRNA was prepared following the GeneChip WT Pico amplification protocol (Affymetrix). RNA amplification was achieved using low-cycle PCR followed by amplification using T7 in vitro transcription. The cRNA was converted to biotinylated sense-strand DNA hybridisation targets.	Target labelled mRNA was prepared following the GeneChip WT Pico amplification protocol (Affymetrix). RNA amplification was achieved using low-cycle PCR followed by amplification using T7 in vitro transcription. The cRNA was converted to biotinylated sense-strand DNA hybridisation targets.	Target labelled mRNA was prepared following the GeneChip WT Pico amplification protocol (Affymetrix). RNA amplification was achieved using low-cycle PCR followed by amplification using T7 in vitro transcription. The cRNA was converted to biotinylated sense-strand DNA hybridisation targets.	Target labelled mRNA was prepared following the GeneChip WT Pico amplification protocol (Affymetrix). RNA amplification was achieved using low-cycle PCR followed by amplification using T7 in vitro transcription. The cRNA was converted to biotinylated sense-strand DNA hybridisation targets.	Target labelled mRNA was prepared following the GeneChip WT Pico amplification protocol (Affymetrix). RNA amplification was achieved using low-cycle PCR followed by amplification using T7 in vitro transcription. The cRNA was converted to biotinylated sense-strand DNA hybridisation targets.	Target labelled mRNA was prepared following the GeneChip WT Pico amplification protocol (Affymetrix). RNA amplification was achieved using low-cycle PCR followed by amplification using T7 in vitro transcription. The cRNA was converted to biotinylated sense-strand DNA hybridisation targets.	Target labelled mRNA was prepared following the GeneChip WT Pico amplification protocol (Affymetrix). RNA amplification was achieved using low-cycle PCR followed by amplification using T7 in vitro transcription. The cRNA was converted to biotinylated sense-strand DNA hybridisation targets.	Target labelled mRNA was prepared following the GeneChip WT Pico amplification protocol (Affymetrix). RNA amplification was achieved using low-cycle PCR followed by amplification using T7 in vitro transcription. The cRNA was converted to biotinylated sense-strand DNA hybridisation targets.	Target labelled mRNA was prepared following the GeneChip WT Pico amplification protocol (Affymetrix). RNA amplification was achieved using low-cycle PCR followed by amplification using T7 in vitro transcription. The cRNA was converted to biotinylated sense-strand DNA hybridisation targets.	Target labelled mRNA was prepared following the GeneChip WT Pico amplification protocol (Affymetrix). RNA amplification was achieved using low-cycle PCR followed by amplification using T7 in vitro transcription. The cRNA was converted to biotinylated sense-strand DNA hybridisation targets.	Target labelled mRNA was prepared following the GeneChip WT Pico amplification protocol (Affymetrix). RNA amplification was achieved using low-cycle PCR followed by amplification using T7 in vitro transcription. The cRNA was converted to biotinylated sense-strand DNA hybridisation targets.	Target labelled mRNA was prepared following the GeneChip WT Pico amplification protocol (Affymetrix). RNA amplification was achieved using low-cycle PCR followed by amplification using T7 in vitro transcription. The cRNA was converted to biotinylated sense-strand DNA hybridisation targets.	Target labelled mRNA was prepared following the GeneChip WT Pico amplification protocol (Affymetrix). RNA amplification was achieved using low-cycle PCR followed by amplification using T7 in vitro transcription. The cRNA was converted to biotinylated sense-strand DNA hybridisation targets.	Target labelled mRNA was prepared following the GeneChip WT Pico amplification protocol (Affymetrix). RNA amplification was achieved using low-cycle PCR followed by amplification using T7 in vitro transcription. The cRNA was converted to biotinylated sense-strand DNA hybridisation targets.	Target labelled mRNA was prepared following the GeneChip WT Pico amplification protocol (Affymetrix). RNA amplification was achieved using low-cycle PCR followed by amplification using T7 in vitro transcription. The cRNA was converted to biotinylated sense-strand DNA hybridisation targets.	Target labelled mRNA was prepared following the GeneChip WT Pico amplification protocol (Affymetrix). RNA amplification was achieved using low-cycle PCR followed by amplification using T7 in vitro transcription. The cRNA was converted to biotinylated sense-strand DNA hybridisation targets.	Target labelled mRNA was prepared following the GeneChip WT Pico amplification protocol (Affymetrix). RNA amplification was achieved using low-cycle PCR followed by amplification using T7 in vitro transcription. The cRNA was converted to biotinylated sense-strand DNA hybridisation targets.	Target labelled mRNA was prepared following the GeneChip WT Pico amplification protocol (Affymetrix). RNA amplification was achieved using low-cycle PCR followed by amplification using T7 in vitro transcription. The cRNA was converted to biotinylated sense-strand DNA hybridisation targets.	Target labelled mRNA was prepared following the GeneChip WT Pico amplification protocol (Affymetrix). RNA amplification was achieved using low-cycle PCR followed by amplification using T7 in vitro transcription. The cRNA was converted to biotinylated sense-strand DNA hybridisation targets.	Target labelled mRNA was prepared following the GeneChip WT Pico amplification protocol (Affymetrix). RNA amplification was achieved using low-cycle PCR followed by amplification using T7 in vitro transcription. The cRNA was converted to biotinylated sense-strand DNA hybridisation targets.	Target labelled mRNA was prepared following the GeneChip WT Pico amplification protocol (Affymetrix). RNA amplification was achieved using low-cycle PCR followed by amplification using T7 in vitro transcription. The cRNA was converted to biotinylated sense-strand DNA hybridisation targets.
!Sample_taxid_ch1	9606	9606	9606	9606	9606	9606	9606	9606	9606	9606	9606	9606	9606	9606	9606	9606	9606	9606	9606	9606	9606	9606	9606	9606	9606	9606	9606	9606	9606	9606	9606	9606	9606	9606	9606	9606	9606	9606	9606	9606	9606	9606	9606	9606	9606	9606	9606	9606	9606
!Sample_hyb_protocol	Approximately 5.5 渭g amplified cDNA was fragmented, labelled and hybridised to Affymetrix Clariom S Array chips for 16 h at 45 掳C in a rotating oven at 60 rpm	Approximately 5.5 渭g amplified cDNA was fragmented, labelled and hybridised to Affymetrix Clariom S Array chips for 16 h at 45 掳C in a rotating oven at 60 rpm	Approximately 5.5 渭g amplified cDNA was fragmented, labelled and hybridised to Affymetrix Clariom S Array chips for 16 h at 45 掳C in a rotating oven at 60 rpm	Approximately 5.5 渭g amplified cDNA was fragmented, labelled and hybridised to Affymetrix Clariom S Array chips for 16 h at 45 掳C in a rotating oven at 60 rpm	Approximately 5.5 渭g amplified cDNA was fragmented, labelled and hybridised to Affymetrix Clariom S Array chips for 16 h at 45 掳C in a rotating oven at 60 rpm	Approximately 5.5 渭g amplified cDNA was fragmented, labelled and hybridised to Affymetrix Clariom S Array chips for 16 h at 45 掳C in a rotating oven at 60 rpm	Approximately 5.5 渭g amplified cDNA was fragmented, labelled and hybridised to Affymetrix Clariom S Array chips for 16 h at 45 掳C in a rotating oven at 60 rpm	Approximately 5.5 渭g amplified cDNA was fragmented, labelled and hybridised to Affymetrix Clariom S Array chips for 16 h at 45 掳C in a rotating oven at 60 rpm	Approximately 5.5 渭g amplified cDNA was fragmented, labelled and hybridised to Affymetrix Clariom S Array chips for 16 h at 45 掳C in a rotating oven at 60 rpm	Approximately 5.5 渭g amplified cDNA was fragmented, labelled and hybridised to Affymetrix Clariom S Array chips for 16 h at 45 掳C in a rotating oven at 60 rpm	Approximately 5.5 渭g amplified cDNA was fragmented, labelled and hybridised to Affymetrix Clariom S Array chips for 16 h at 45 掳C in a rotating oven at 60 rpm	Approximately 5.5 渭g amplified cDNA was fragmented, labelled and hybridised to Affymetrix Clariom S Array chips for 16 h at 45 掳C in a rotating oven at 60 rpm	Approximately 5.5 渭g amplified cDNA was fragmented, labelled and hybridised to Affymetrix Clariom S Array chips for 16 h at 45 掳C in a rotating oven at 60 rpm	Approximately 5.5 渭g amplified cDNA was fragmented, labelled and hybridised to Affymetrix Clariom S Array chips for 16 h at 45 掳C in a rotating oven at 60 rpm	Approximately 5.5 渭g amplified cDNA was fragmented, labelled and hybridised to Affymetrix Clariom S Array chips for 16 h at 45 掳C in a rotating oven at 60 rpm	Approximately 5.5 渭g amplified cDNA was fragmented, labelled and hybridised to Affymetrix Clariom S Array chips for 16 h at 45 掳C in a rotating oven at 60 rpm	Approximately 5.5 渭g amplified cDNA was fragmented, labelled and hybridised to Affymetrix Clariom S Array chips for 16 h at 45 掳C in a rotating oven at 60 rpm	Approximately 5.5 渭g amplified cDNA was fragmented, labelled and hybridised to Affymetrix Clariom S Array chips for 16 h at 45 掳C in a rotating oven at 60 rpm	Approximately 5.5 渭g amplified cDNA was fragmented, labelled and hybridised to Affymetrix Clariom S Array chips for 16 h at 45 掳C in a rotating oven at 60 rpm	Approximately 5.5 渭g amplified cDNA was fragmented, labelled and hybridised to Affymetrix Clariom S Array chips for 16 h at 45 掳C in a rotating oven at 60 rpm	Approximately 5.5 渭g amplified cDNA was fragmented, labelled and hybridised to Affymetrix Clariom S Array chips for 16 h at 45 掳C in a rotating oven at 60 rpm	Approximately 5.5 渭g amplified cDNA was fragmented, labelled and hybridised to Affymetrix Clariom S Array chips for 16 h at 45 掳C in a rotating oven at 60 rpm	Approximately 5.5 渭g amplified cDNA was fragmented, labelled and hybridised to Affymetrix Clariom S Array chips for 16 h at 45 掳C in a rotating oven at 60 rpm	Approximately 5.5 渭g amplified cDNA was fragmented, labelled and hybridised to Affymetrix Clariom S Array chips for 16 h at 45 掳C in a rotating oven at 60 rpm	Approximately 5.5 渭g amplified cDNA was fragmented, labelled and hybridised to Affymetrix Clariom S Array chips for 16 h at 45 掳C in a rotating oven at 60 rpm	Approximately 5.5 渭g amplified cDNA was fragmented, labelled and hybridised to Affymetrix Clariom S Array chips for 16 h at 45 掳C in a rotating oven at 60 rpm	Approximately 5.5 渭g amplified cDNA was fragmented, labelled and hybridised to Affymetrix Clariom S Array chips for 16 h at 45 掳C in a rotating oven at 60 rpm	Approximately 5.5 渭g amplified cDNA was fragmented, labelled and hybridised to Affymetrix Clariom S Array chips for 16 h at 45 掳C in a rotating oven at 60 rpm	Approximately 5.5 渭g amplified cDNA was fragmented, labelled and hybridised to Affymetrix Clariom S Array chips for 16 h at 45 掳C in a rotating oven at 60 rpm	Approximately 5.5 渭g amplified cDNA was fragmented, labelled and hybridised to Affymetrix Clariom S Array chips for 16 h at 45 掳C in a rotating oven at 60 rpm	Approximately 5.5 渭g amplified cDNA was fragmented, labelled and hybridised to Affymetrix Clariom S Array chips for 16 h at 45 掳C in a rotating oven at 60 rpm	Approximately 5.5 渭g amplified cDNA was fragmented, labelled and hybridised to Affymetrix Clariom S Array chips for 16 h at 45 掳C in a rotating oven at 60 rpm	Approximately 5.5 渭g amplified cDNA was fragmented, labelled and hybridised to Affymetrix Clariom S Array chips for 16 h at 45 掳C in a rotating oven at 60 rpm	Approximately 5.5 渭g amplified cDNA was fragmented, labelled and hybridised to Affymetrix Clariom S Array chips for 16 h at 45 掳C in a rotating oven at 60 rpm	Approximately 5.5 渭g amplified cDNA was fragmented, labelled and hybridised to Affymetrix Clariom S Array chips for 16 h at 45 掳C in a rotating oven at 60 rpm	Approximately 5.5 渭g amplified cDNA was fragmented, labelled and hybridised to Affymetrix Clariom S Array chips for 16 h at 45 掳C in a rotating oven at 60 rpm	Approximately 5.5 渭g amplified cDNA was fragmented, labelled and hybridised to Affymetrix Clariom S Array chips for 16 h at 45 掳C in a rotating oven at 60 rpm	Approximately 5.5 渭g amplified cDNA was fragmented, labelled and hybridised to Affymetrix Clariom S Array chips for 16 h at 45 掳C in a rotating oven at 60 rpm	Approximately 5.5 渭g amplified cDNA was fragmented, labelled and hybridised to Affymetrix Clariom S Array chips for 16 h at 45 掳C in a rotating oven at 60 rpm	Approximately 5.5 渭g amplified cDNA was fragmented, labelled and hybridised to Affymetrix Clariom S Array chips for 16 h at 45 掳C in a rotating oven at 60 rpm	Approximately 5.5 渭g amplified cDNA was fragmented, labelled and hybridised to Affymetrix Clariom S Array chips for 16 h at 45 掳C in a rotating oven at 60 rpm	Approximately 5.5 渭g amplified cDNA was fragmented, labelled and hybridised to Affymetrix Clariom S Array chips for 16 h at 45 掳C in a rotating oven at 60 rpm	Approximately 5.5 渭g amplified cDNA was fragmented, labelled and hybridised to Affymetrix Clariom S Array chips for 16 h at 45 掳C in a rotating oven at 60 rpm	Approximately 5.5 渭g amplified cDNA was fragmented, labelled and hybridised to Affymetrix Clariom S Array chips for 16 h at 45 掳C in a rotating oven at 60 rpm	Approximately 5.5 渭g amplified cDNA was fragmented, labelled and hybridised to Affymetrix Clariom S Array chips for 16 h at 45 掳C in a rotating oven at 60 rpm	Approximately 5.5 渭g amplified cDNA was fragmented, labelled and hybridised to Affymetrix Clariom S Array chips for 16 h at 45 掳C in a rotating oven at 60 rpm	Approximately 5.5 渭g amplified cDNA was fragmented, labelled and hybridised to Affymetrix Clariom S Array chips for 16 h at 45 掳C in a rotating oven at 60 rpm	Approximately 5.5 渭g amplified cDNA was fragmented, labelled and hybridised to Affymetrix Clariom S Array chips for 16 h at 45 掳C in a rotating oven at 60 rpm	Approximately 5.5 渭g amplified cDNA was fragmented, labelled and hybridised to Affymetrix Clariom S Array chips for 16 h at 45 掳C in a rotating oven at 60 rpm
!Sample_scan_protocol	Using the Fluidics Station 400, and Gene Chip Operating System, the hybridisation cocktail was removed, and a series of stringency washing steps followed to remove any unbound DNA, before each microarray was stained. Each microarray chip was scanned using the GeneChip 3000 scanner to determine the fluorescence intensity of hybridised transcripts.	Using the Fluidics Station 400, and Gene Chip Operating System, the hybridisation cocktail was removed, and a series of stringency washing steps followed to remove any unbound DNA, before each microarray was stained. Each microarray chip was scanned using the GeneChip 3000 scanner to determine the fluorescence intensity of hybridised transcripts.	Using the Fluidics Station 400, and Gene Chip Operating System, the hybridisation cocktail was removed, and a series of stringency washing steps followed to remove any unbound DNA, before each microarray was stained. Each microarray chip was scanned using the GeneChip 3000 scanner to determine the fluorescence intensity of hybridised transcripts.	Using the Fluidics Station 400, and Gene Chip Operating System, the hybridisation cocktail was removed, and a series of stringency washing steps followed to remove any unbound DNA, before each microarray was stained. Each microarray chip was scanned using the GeneChip 3000 scanner to determine the fluorescence intensity of hybridised transcripts.	Using the Fluidics Station 400, and Gene Chip Operating System, the hybridisation cocktail was removed, and a series of stringency washing steps followed to remove any unbound DNA, before each microarray was stained. Each microarray chip was scanned using the GeneChip 3000 scanner to determine the fluorescence intensity of hybridised transcripts.	Using the Fluidics Station 400, and Gene Chip Operating System, the hybridisation cocktail was removed, and a series of stringency washing steps followed to remove any unbound DNA, before each microarray was stained. Each microarray chip was scanned using the GeneChip 3000 scanner to determine the fluorescence intensity of hybridised transcripts.	Using the Fluidics Station 400, and Gene Chip Operating System, the hybridisation cocktail was removed, and a series of stringency washing steps followed to remove any unbound DNA, before each microarray was stained. Each microarray chip was scanned using the GeneChip 3000 scanner to determine the fluorescence intensity of hybridised transcripts.	Using the Fluidics Station 400, and Gene Chip Operating System, the hybridisation cocktail was removed, and a series of stringency washing steps followed to remove any unbound DNA, before each microarray was stained. Each microarray chip was scanned using the GeneChip 3000 scanner to determine the fluorescence intensity of hybridised transcripts.	Using the Fluidics Station 400, and Gene Chip Operating System, the hybridisation cocktail was removed, and a series of stringency washing steps followed to remove any unbound DNA, before each microarray was stained. Each microarray chip was scanned using the GeneChip 3000 scanner to determine the fluorescence intensity of hybridised transcripts.	Using the Fluidics Station 400, and Gene Chip Operating System, the hybridisation cocktail was removed, and a series of stringency washing steps followed to remove any unbound DNA, before each microarray was stained. Each microarray chip was scanned using the GeneChip 3000 scanner to determine the fluorescence intensity of hybridised transcripts.	Using the Fluidics Station 400, and Gene Chip Operating System, the hybridisation cocktail was removed, and a series of stringency washing steps followed to remove any unbound DNA, before each microarray was stained. Each microarray chip was scanned using the GeneChip 3000 scanner to determine the fluorescence intensity of hybridised transcripts.	Using the Fluidics Station 400, and Gene Chip Operating System, the hybridisation cocktail was removed, and a series of stringency washing steps followed to remove any unbound DNA, before each microarray was stained. Each microarray chip was scanned using the GeneChip 3000 scanner to determine the fluorescence intensity of hybridised transcripts.	Using the Fluidics Station 400, and Gene Chip Operating System, the hybridisation cocktail was removed, and a series of stringency washing steps followed to remove any unbound DNA, before each microarray was stained. Each microarray chip was scanned using the GeneChip 3000 scanner to determine the fluorescence intensity of hybridised transcripts.	Using the Fluidics Station 400, and Gene Chip Operating System, the hybridisation cocktail was removed, and a series of stringency washing steps followed to remove any unbound DNA, before each microarray was stained. Each microarray chip was scanned using the GeneChip 3000 scanner to determine the fluorescence intensity of hybridised transcripts.	Using the Fluidics Station 400, and Gene Chip Operating System, the hybridisation cocktail was removed, and a series of stringency washing steps followed to remove any unbound DNA, before each microarray was stained. Each microarray chip was scanned using the GeneChip 3000 scanner to determine the fluorescence intensity of hybridised transcripts.	Using the Fluidics Station 400, and Gene Chip Operating System, the hybridisation cocktail was removed, and a series of stringency washing steps followed to remove any unbound DNA, before each microarray was stained. Each microarray chip was scanned using the GeneChip 3000 scanner to determine the fluorescence intensity of hybridised transcripts.	Using the Fluidics Station 400, and Gene Chip Operating System, the hybridisation cocktail was removed, and a series of stringency washing steps followed to remove any unbound DNA, before each microarray was stained. Each microarray chip was scanned using the GeneChip 3000 scanner to determine the fluorescence intensity of hybridised transcripts.	Using the Fluidics Station 400, and Gene Chip Operating System, the hybridisation cocktail was removed, and a series of stringency washing steps followed to remove any unbound DNA, before each microarray was stained. Each microarray chip was scanned using the GeneChip 3000 scanner to determine the fluorescence intensity of hybridised transcripts.	Using the Fluidics Station 400, and Gene Chip Operating System, the hybridisation cocktail was removed, and a series of stringency washing steps followed to remove any unbound DNA, before each microarray was stained. Each microarray chip was scanned using the GeneChip 3000 scanner to determine the fluorescence intensity of hybridised transcripts.	Using the Fluidics Station 400, and Gene Chip Operating System, the hybridisation cocktail was removed, and a series of stringency washing steps followed to remove any unbound DNA, before each microarray was stained. Each microarray chip was scanned using the GeneChip 3000 scanner to determine the fluorescence intensity of hybridised transcripts.	Using the Fluidics Station 400, and Gene Chip Operating System, the hybridisation cocktail was removed, and a series of stringency washing steps followed to remove any unbound DNA, before each microarray was stained. Each microarray chip was scanned using the GeneChip 3000 scanner to determine the fluorescence intensity of hybridised transcripts.	Using the Fluidics Station 400, and Gene Chip Operating System, the hybridisation cocktail was removed, and a series of stringency washing steps followed to remove any unbound DNA, before each microarray was stained. Each microarray chip was scanned using the GeneChip 3000 scanner to determine the fluorescence intensity of hybridised transcripts.	Using the Fluidics Station 400, and Gene Chip Operating System, the hybridisation cocktail was removed, and a series of stringency washing steps followed to remove any unbound DNA, before each microarray was stained. Each microarray chip was scanned using the GeneChip 3000 scanner to determine the fluorescence intensity of hybridised transcripts.	Using the Fluidics Station 400, and Gene Chip Operating System, the hybridisation cocktail was removed, and a series of stringency washing steps followed to remove any unbound DNA, before each microarray was stained. Each microarray chip was scanned using the GeneChip 3000 scanner to determine the fluorescence intensity of hybridised transcripts.	Using the Fluidics Station 400, and Gene Chip Operating System, the hybridisation cocktail was removed, and a series of stringency washing steps followed to remove any unbound DNA, before each microarray was stained. Each microarray chip was scanned using the GeneChip 3000 scanner to determine the fluorescence intensity of hybridised transcripts.	Using the Fluidics Station 400, and Gene Chip Operating System, the hybridisation cocktail was removed, and a series of stringency washing steps followed to remove any unbound DNA, before each microarray was stained. Each microarray chip was scanned using the GeneChip 3000 scanner to determine the fluorescence intensity of hybridised transcripts.	Using the Fluidics Station 400, and Gene Chip Operating System, the hybridisation cocktail was removed, and a series of stringency washing steps followed to remove any unbound DNA, before each microarray was stained. Each microarray chip was scanned using the GeneChip 3000 scanner to determine the fluorescence intensity of hybridised transcripts.	Using the Fluidics Station 400, and Gene Chip Operating System, the hybridisation cocktail was removed, and a series of stringency washing steps followed to remove any unbound DNA, before each microarray was stained. Each microarray chip was scanned using the GeneChip 3000 scanner to determine the fluorescence intensity of hybridised transcripts.	Using the Fluidics Station 400, and Gene Chip Operating System, the hybridisation cocktail was removed, and a series of stringency washing steps followed to remove any unbound DNA, before each microarray was stained. Each microarray chip was scanned using the GeneChip 3000 scanner to determine the fluorescence intensity of hybridised transcripts.	Using the Fluidics Station 400, and Gene Chip Operating System, the hybridisation cocktail was removed, and a series of stringency washing steps followed to remove any unbound DNA, before each microarray was stained. Each microarray chip was scanned using the GeneChip 3000 scanner to determine the fluorescence intensity of hybridised transcripts.	Using the Fluidics Station 400, and Gene Chip Operating System, the hybridisation cocktail was removed, and a series of stringency washing steps followed to remove any unbound DNA, before each microarray was stained. Each microarray chip was scanned using the GeneChip 3000 scanner to determine the fluorescence intensity of hybridised transcripts.	Using the Fluidics Station 400, and Gene Chip Operating System, the hybridisation cocktail was removed, and a series of stringency washing steps followed to remove any unbound DNA, before each microarray was stained. Each microarray chip was scanned using the GeneChip 3000 scanner to determine the fluorescence intensity of hybridised transcripts.	Using the Fluidics Station 400, and Gene Chip Operating System, the hybridisation cocktail was removed, and a series of stringency washing steps followed to remove any unbound DNA, before each microarray was stained. Each microarray chip was scanned using the GeneChip 3000 scanner to determine the fluorescence intensity of hybridised transcripts.	Using the Fluidics Station 400, and Gene Chip Operating System, the hybridisation cocktail was removed, and a series of stringency washing steps followed to remove any unbound DNA, before each microarray was stained. Each microarray chip was scanned using the GeneChip 3000 scanner to determine the fluorescence intensity of hybridised transcripts.	Using the Fluidics Station 400, and Gene Chip Operating System, the hybridisation cocktail was removed, and a series of stringency washing steps followed to remove any unbound DNA, before each microarray was stained. Each microarray chip was scanned using the GeneChip 3000 scanner to determine the fluorescence intensity of hybridised transcripts.	Using the Fluidics Station 400, and Gene Chip Operating System, the hybridisation cocktail was removed, and a series of stringency washing steps followed to remove any unbound DNA, before each microarray was stained. Each microarray chip was scanned using the GeneChip 3000 scanner to determine the fluorescence intensity of hybridised transcripts.	Using the Fluidics Station 400, and Gene Chip Operating System, the hybridisation cocktail was removed, and a series of stringency washing steps followed to remove any unbound DNA, before each microarray was stained. Each microarray chip was scanned using the GeneChip 3000 scanner to determine the fluorescence intensity of hybridised transcripts.	Using the Fluidics Station 400, and Gene Chip Operating System, the hybridisation cocktail was removed, and a series of stringency washing steps followed to remove any unbound DNA, before each microarray was stained. Each microarray chip was scanned using the GeneChip 3000 scanner to determine the fluorescence intensity of hybridised transcripts.	Using the Fluidics Station 400, and Gene Chip Operating System, the hybridisation cocktail was removed, and a series of stringency washing steps followed to remove any unbound DNA, before each microarray was stained. Each microarray chip was scanned using the GeneChip 3000 scanner to determine the fluorescence intensity of hybridised transcripts.	Using the Fluidics Station 400, and Gene Chip Operating System, the hybridisation cocktail was removed, and a series of stringency washing steps followed to remove any unbound DNA, before each microarray was stained. Each microarray chip was scanned using the GeneChip 3000 scanner to determine the fluorescence intensity of hybridised transcripts.	Using the Fluidics Station 400, and Gene Chip Operating System, the hybridisation cocktail was removed, and a series of stringency washing steps followed to remove any unbound DNA, before each microarray was stained. Each microarray chip was scanned using the GeneChip 3000 scanner to determine the fluorescence intensity of hybridised transcripts.	Using the Fluidics Station 400, and Gene Chip Operating System, the hybridisation cocktail was removed, and a series of stringency washing steps followed to remove any unbound DNA, before each microarray was stained. Each microarray chip was scanned using the GeneChip 3000 scanner to determine the fluorescence intensity of hybridised transcripts.	Using the Fluidics Station 400, and Gene Chip Operating System, the hybridisation cocktail was removed, and a series of stringency washing steps followed to remove any unbound DNA, before each microarray was stained. Each microarray chip was scanned using the GeneChip 3000 scanner to determine the fluorescence intensity of hybridised transcripts.	Using the Fluidics Station 400, and Gene Chip Operating System, the hybridisation cocktail was removed, and a series of stringency washing steps followed to remove any unbound DNA, before each microarray was stained. Each microarray chip was scanned using the GeneChip 3000 scanner to determine the fluorescence intensity of hybridised transcripts.	Using the Fluidics Station 400, and Gene Chip Operating System, the hybridisation cocktail was removed, and a series of stringency washing steps followed to remove any unbound DNA, before each microarray was stained. Each microarray chip was scanned using the GeneChip 3000 scanner to determine the fluorescence intensity of hybridised transcripts.	Using the Fluidics Station 400, and Gene Chip Operating System, the hybridisation cocktail was removed, and a series of stringency washing steps followed to remove any unbound DNA, before each microarray was stained. Each microarray chip was scanned using the GeneChip 3000 scanner to determine the fluorescence intensity of hybridised transcripts.	Using the Fluidics Station 400, and Gene Chip Operating System, the hybridisation cocktail was removed, and a series of stringency washing steps followed to remove any unbound DNA, before each microarray was stained. Each microarray chip was scanned using the GeneChip 3000 scanner to determine the fluorescence intensity of hybridised transcripts.	Using the Fluidics Station 400, and Gene Chip Operating System, the hybridisation cocktail was removed, and a series of stringency washing steps followed to remove any unbound DNA, before each microarray was stained. Each microarray chip was scanned using the GeneChip 3000 scanner to determine the fluorescence intensity of hybridised transcripts.	Using the Fluidics Station 400, and Gene Chip Operating System, the hybridisation cocktail was removed, and a series of stringency washing steps followed to remove any unbound DNA, before each microarray was stained. Each microarray chip was scanned using the GeneChip 3000 scanner to determine the fluorescence intensity of hybridised transcripts.
!Sample_description	Gene expression data from PSND astrocytes	Gene expression data from PSD astrocytes	Gene expression data from PSD astrocytes	Gene expression data from control astrocytes	Gene expression data from PSD astrocytes	Gene expression data from PSND astrocytes	Gene expression data from control astrocytes	Gene expression data from control astrocytes	Gene expression data from control astrocytes	Gene expression data from PSD astrocytes	Gene expression data from PSND astrocytes	Gene expression data from PSND astrocytes	Gene expression data from PSND astrocytes	Gene expression data from PSND astrocytes	Gene expression data from PSD astrocytes	Gene expression data from control astrocytes	Gene expression data from PSD astrocytes	Gene expression data from control astrocytes	Gene expression data from PSD astrocytes	Gene expression data from PSND astrocytes	Gene expression data from PSD astrocytes	Gene expression data from control astrocytes	Gene expression data from PSND astrocytes	Gene expression data from control astrocytes	Gene expression data from control astrocytes	Gene expression data from PSD astrocytes	Gene expression data from control astrocytes	Gene expression data from PSD astrocytes	Gene expression data from PSND astrocytes	Gene expression data from PSND astrocytes	Gene expression data from PSND neurons	Gene expression data from PSD neurons	Gene expression data from PSD neurons	Gene expression data from control neurons	Gene expression data from PSD neurons	Gene expression data from PSND neurons	Gene expression data from control neurons	Gene expression data from control neurons	Gene expression data from control neurons	Gene expression data from PSD neurons	Gene expression data from PSND neurons	Gene expression data from PSND neurons	Gene expression data from PSND neurons	Gene expression data from PSND neurons	Gene expression data from PSD neurons	Gene expression data from control neurons	Gene expression data from PSD neurons	Gene expression data from control neurons	Gene expression data from PSD neurons
!Sample_data_processing	Transcription Analysis Console (TAC) was used for quality control and analysis of the data, the .CEL files were imported into TAC version 4.0.1 (Applied Biosystems, USA) and normalised to the median of all genes, prior to statistical analysis, to identify differentially expressed genes (DEGs). Transcripts were defined as being significantly differentially expressed if they showed a p-value of < 0…	Transcription Analysis Console (TAC) was used for quality control and analysis of the data, the .CEL files were imported into TAC version 4.0.1 (Applied Biosystems, USA) and normalised to the median of all genes, prior to statistical analysis, to identify differentially expressed genes (DEGs). Transcripts were defined as being significantly differentially expressed if they showed a p-value of < 0…	Transcription Analysis Console (TAC) was used for quality control and analysis of the data, the .CEL files were imported into TAC version 4.0.1 (Applied Biosystems, USA) and normalised to the median of all genes, prior to statistical analysis, to identify differentially expressed genes (DEGs). Transcripts were defined as being significantly differentially expressed if they showed a p-value of < 0…	Transcription Analysis Console (TAC) was used for quality control and analysis of the data, the .CEL files were imported into TAC version 4.0.1 (Applied Biosystems, USA) and normalised to the median of all genes, prior to statistical analysis, to identify differentially expressed genes (DEGs). Transcripts were defined as being significantly differentially expressed if they showed a p-value of < 0…	Transcription Analysis Console (TAC) was used for quality control and analysis of the data, the .CEL files were imported into TAC version 4.0.1 (Applied Biosystems, USA) and normalised to the median of all genes, prior to statistical analysis, to identify differentially expressed genes (DEGs). Transcripts were defined as being significantly differentially expressed if they showed a p-value of < 0…	Transcription Analysis Console (TAC) was used for quality control and analysis of the data, the .CEL files were imported into TAC version 4.0.1 (Applied Biosystems, USA) and normalised to the median of all genes, prior to statistical analysis, to identify differentially expressed genes (DEGs). Transcripts were defined as being significantly differentially expressed if they showed a p-value of < 0…	Transcription Analysis Console (TAC) was used for quality control and analysis of the data, the .CEL files were imported into TAC version 4.0.1 (Applied Biosystems, USA) and normalised to the median of all genes, prior to statistical analysis, to identify differentially expressed genes (DEGs). Transcripts were defined as being significantly differentially expressed if they showed a p-value of < 0…	Transcription Analysis Console (TAC) was used for quality control and analysis of the data, the .CEL files were imported into TAC version 4.0.1 (Applied Biosystems, USA) and normalised to the median of all genes, prior to statistical analysis, to identify differentially expressed genes (DEGs). Transcripts were defined as being significantly differentially expressed if they showed a p-value of < 0…	Transcription Analysis Console (TAC) was used for quality control and analysis of the data, the .CEL files were imported into TAC version 4.0.1 (Applied Biosystems, USA) and normalised to the median of all genes, prior to statistical analysis, to identify differentially expressed genes (DEGs). Transcripts were defined as being significantly differentially expressed if they showed a p-value of < 0…	Transcription Analysis Console (TAC) was used for quality control and analysis of the data, the .CEL files were imported into TAC version 4.0.1 (Applied Biosystems, USA) and normalised to the median of all genes, prior to statistical analysis, to identify differentially expressed genes (DEGs). Transcripts were defined as being significantly differentially expressed if they showed a p-value of < 0…	Transcription Analysis Console (TAC) was used for quality control and analysis of the data, the .CEL files were imported into TAC version 4.0.1 (Applied Biosystems, USA) and normalised to the median of all genes, prior to statistical analysis, to identify differentially expressed genes (DEGs). Transcripts were defined as being significantly differentially expressed if they showed a p-value of < 0…	Transcription Analysis Console (TAC) was used for quality control and analysis of the data, the .CEL files were imported into TAC version 4.0.1 (Applied Biosystems, USA) and normalised to the median of all genes, prior to statistical analysis, to identify differentially expressed genes (DEGs). Transcripts were defined as being significantly differentially expressed if they showed a p-value of < 0…	Transcription Analysis Console (TAC) was used for quality control and analysis of the data, the .CEL files were imported into TAC version 4.0.1 (Applied Biosystems, USA) and normalised to the median of all genes, prior to statistical analysis, to identify differentially expressed genes (DEGs). Transcripts were defined as being significantly differentially expressed if they showed a p-value of < 0…	Transcription Analysis Console (TAC) was used for quality control and analysis of the data, the .CEL files were imported into TAC version 4.0.1 (Applied Biosystems, USA) and normalised to the median of all genes, prior to statistical analysis, to identify differentially expressed genes (DEGs). Transcripts were defined as being significantly differentially expressed if they showed a p-value of < 0…	Transcription Analysis Console (TAC) was used for quality control and analysis of the data, the .CEL files were imported into TAC version 4.0.1 (Applied Biosystems, USA) and normalised to the median of all genes, prior to statistical analysis, to identify differentially expressed genes (DEGs). Transcripts were defined as being significantly differentially expressed if they showed a p-value of < 0…	Transcription Analysis Console (TAC) was used for quality control and analysis of the data, the .CEL files were imported into TAC version 4.0.1 (Applied Biosystems, USA) and normalised to the median of all genes, prior to statistical analysis, to identify differentially expressed genes (DEGs). Transcripts were defined as being significantly differentially expressed if they showed a p-value of < 0…	Transcription Analysis Console (TAC) was used for quality control and analysis of the data, the .CEL files were imported into TAC version 4.0.1 (Applied Biosystems, USA) and normalised to the median of all genes, prior to statistical analysis, to identify differentially expressed genes (DEGs). Transcripts were defined as being significantly differentially expressed if they showed a p-value of < 0…	Transcription Analysis Console (TAC) was used for quality control and analysis of the data, the .CEL files were imported into TAC version 4.0.1 (Applied Biosystems, USA) and normalised to the median of all genes, prior to statistical analysis, to identify differentially expressed genes (DEGs). Transcripts were defined as being significantly differentially expressed if they showed a p-value of < 0…	Transcription Analysis Console (TAC) was used for quality control and analysis of the data, the .CEL files were imported into TAC version 4.0.1 (Applied Biosystems, USA) and normalised to the median of all genes, prior to statistical analysis, to identify differentially expressed genes (DEGs). Transcripts were defined as being significantly differentially expressed if they showed a p-value of < 0…	Transcription Analysis Console (TAC) was used for quality control and analysis of the data, the .CEL files were imported into TAC version 4.0.1 (Applied Biosystems, USA) and normalised to the median of all genes, prior to statistical analysis, to identify differentially expressed genes (DEGs). Transcripts were defined as being significantly differentially expressed if they showed a p-value of < 0…	Transcription Analysis Console (TAC) was used for quality control and analysis of the data, the .CEL files were imported into TAC version 4.0.1 (Applied Biosystems, USA) and normalised to the median of all genes, prior to statistical analysis, to identify differentially expressed genes (DEGs). Transcripts were defined as being significantly differentially expressed if they showed a p-value of < 0…	Transcription Analysis Console (TAC) was used for quality control and analysis of the data, the .CEL files were imported into TAC version 4.0.1 (Applied Biosystems, USA) and normalised to the median of all genes, prior to statistical analysis, to identify differentially expressed genes (DEGs). Transcripts were defined as being significantly differentially expressed if they showed a p-value of < 0…	Transcription Analysis Console (TAC) was used for quality control and analysis of the data, the .CEL files were imported into TAC version 4.0.1 (Applied Biosystems, USA) and normalised to the median of all genes, prior to statistical analysis, to identify differentially expressed genes (DEGs). Transcripts were defined as being significantly differentially expressed if they showed a p-value of < 0…	Transcription Analysis Console (TAC) was used for quality control and analysis of the data, the .CEL files were imported into TAC version 4.0.1 (Applied Biosystems, USA) and normalised to the median of all genes, prior to statistical analysis, to identify differentially expressed genes (DEGs). Transcripts were defined as being significantly differentially expressed if they showed a p-value of < 0…	Transcription Analysis Console (TAC) was used for quality control and analysis of the data, the .CEL files were imported into TAC version 4.0.1 (Applied Biosystems, USA) and normalised to the median of all genes, prior to statistical analysis, to identify differentially expressed genes (DEGs). Transcripts were defined as being significantly differentially expressed if they showed a p-value of < 0…	Transcription Analysis Console (TAC) was used for quality control and analysis of the data, the .CEL files were imported into TAC version 4.0.1 (Applied Biosystems, USA) and normalised to the median of all genes, prior to statistical analysis, to identify differentially expressed genes (DEGs). Transcripts were defined as being significantly differentially expressed if they showed a p-value of < 0…	Transcription Analysis Console (TAC) was used for quality control and analysis of the data, the .CEL files were imported into TAC version 4.0.1 (Applied Biosystems, USA) and normalised to the median of all genes, prior to statistical analysis, to identify differentially expressed genes (DEGs). Transcripts were defined as being significantly differentially expressed if they showed a p-value of < 0…	Transcription Analysis Console (TAC) was used for quality control and analysis of the data, the .CEL files were imported into TAC version 4.0.1 (Applied Biosystems, USA) and normalised to the median of all genes, prior to statistical analysis, to identify differentially expressed genes (DEGs). Transcripts were defined as being significantly differentially expressed if they showed a p-value of < 0…	Transcription Analysis Console (TAC) was used for quality control and analysis of the data, the .CEL files were imported into TAC version 4.0.1 (Applied Biosystems, USA) and normalised to the median of all genes, prior to statistical analysis, to identify differentially expressed genes (DEGs). Transcripts were defined as being significantly differentially expressed if they showed a p-value of < 0…	Transcription Analysis Console (TAC) was used for quality control and analysis of the data, the .CEL files were imported into TAC version 4.0.1 (Applied Biosystems, USA) and normalised to the median of all genes, prior to statistical analysis, to identify differentially expressed genes (DEGs). Transcripts were defined as being significantly differentially expressed if they showed a p-value of < 0…	Transcription Analysis Console (TAC) was used for quality control and analysis of the data, the .CEL files were imported into TAC version 4.0.1 (Applied Biosystems, USA) and normalised to the median of all genes, prior to statistical analysis, to identify differentially expressed genes (DEGs). Transcripts were defined as being significantly differentially expressed if they showed a p-value of < 0…	Transcription Analysis Console (TAC) was used for quality control and analysis of the data, the .CEL files were imported into TAC version 4.0.1 (Applied Biosystems, USA) and normalised to the median of all genes, prior to statistical analysis, to identify differentially expressed genes (DEGs). Transcripts were defined as being significantly differentially expressed if they showed a p-value of < 0…	Transcription Analysis Console (TAC) was used for quality control and analysis of the data, the .CEL files were imported into TAC version 4.0.1 (Applied Biosystems, USA) and normalised to the median of all genes, prior to statistical analysis, to identify differentially expressed genes (DEGs). Transcripts were defined as being significantly differentially expressed if they showed a p-value of < 0…	Transcription Analysis Console (TAC) was used for quality control and analysis of the data, the .CEL files were imported into TAC version 4.0.1 (Applied Biosystems, USA) and normalised to the median of all genes, prior to statistical analysis, to identify differentially expressed genes (DEGs). Transcripts were defined as being significantly differentially expressed if they showed a p-value of < 0…	Transcription Analysis Console (TAC) was used for quality control and analysis of the data, the .CEL files were imported into TAC version 4.0.1 (Applied Biosystems, USA) and normalised to the median of all genes, prior to statistical analysis, to identify differentially expressed genes (DEGs). Transcripts were defined as being significantly differentially expressed if they showed a p-value of < 0…	Transcription Analysis Console (TAC) was used for quality control and analysis of the data, the .CEL files were imported into TAC version 4.0.1 (Applied Biosystems, USA) and normalised to the median of all genes, prior to statistical analysis, to identify differentially expressed genes (DEGs). Transcripts were defined as being significantly differentially expressed if they showed a p-value of < 0…	Transcription Analysis Console (TAC) was used for quality control and analysis of the data, the .CEL files were imported into TAC version 4.0.1 (Applied Biosystems, USA) and normalised to the median of all genes, prior to statistical analysis, to identify differentially expressed genes (DEGs). Transcripts were defined as being significantly differentially expressed if they showed a p-value of < 0…	Transcription Analysis Console (TAC) was used for quality control and analysis of the data, the .CEL files were imported into TAC version 4.0.1 (Applied Biosystems, USA) and normalised to the median of all genes, prior to statistical analysis, to identify differentially expressed genes (DEGs). Transcripts were defined as being significantly differentially expressed if they showed a p-value of < 0…	Transcription Analysis Console (TAC) was used for quality control and analysis of the data, the .CEL files were imported into TAC version 4.0.1 (Applied Biosystems, USA) and normalised to the median of all genes, prior to statistical analysis, to identify differentially expressed genes (DEGs). Transcripts were defined as being significantly differentially expressed if they showed a p-value of < 0…	Transcription Analysis Console (TAC) was used for quality control and analysis of the data, the .CEL files were imported into TAC version 4.0.1 (Applied Biosystems, USA) and normalised to the median of all genes, prior to statistical analysis, to identify differentially expressed genes (DEGs). Transcripts were defined as being significantly differentially expressed if they showed a p-value of < 0…	Transcription Analysis Console (TAC) was used for quality control and analysis of the data, the .CEL files were imported into TAC version 4.0.1 (Applied Biosystems, USA) and normalised to the median of all genes, prior to statistical analysis, to identify differentially expressed genes (DEGs). Transcripts were defined as being significantly differentially expressed if they showed a p-value of < 0…	Transcription Analysis Console (TAC) was used for quality control and analysis of the data, the .CEL files were imported into TAC version 4.0.1 (Applied Biosystems, USA) and normalised to the median of all genes, prior to statistical analysis, to identify differentially expressed genes (DEGs). Transcripts were defined as being significantly differentially expressed if they showed a p-value of < 0…	Transcription Analysis Console (TAC) was used for quality control and analysis of the data, the .CEL files were imported into TAC version 4.0.1 (Applied Biosystems, USA) and normalised to the median of all genes, prior to statistical analysis, to identify differentially expressed genes (DEGs). Transcripts were defined as being significantly differentially expressed if they showed a p-value of < 0…	Transcription Analysis Console (TAC) was used for quality control and analysis of the data, the .CEL files were imported into TAC version 4.0.1 (Applied Biosystems, USA) and normalised to the median of all genes, prior to statistical analysis, to identify differentially expressed genes (DEGs). Transcripts were defined as being significantly differentially expressed if they showed a p-value of < 0…	Transcription Analysis Console (TAC) was used for quality control and analysis of the data, the .CEL files were imported into TAC version 4.0.1 (Applied Biosystems, USA) and normalised to the median of all genes, prior to statistical analysis, to identify differentially expressed genes (DEGs). Transcripts were defined as being significantly differentially expressed if they showed a p-value of < 0…	Transcription Analysis Console (TAC) was used for quality control and analysis of the data, the .CEL files were imported into TAC version 4.0.1 (Applied Biosystems, USA) and normalised to the median of all genes, prior to statistical analysis, to identify differentially expressed genes (DEGs). Transcripts were defined as being significantly differentially expressed if they showed a p-value of < 0…	Transcription Analysis Console (TAC) was used for quality control and analysis of the data, the .CEL files were imported into TAC version 4.0.1 (Applied Biosystems, USA) and normalised to the median of all genes, prior to statistical analysis, to identify differentially expressed genes (DEGs). Transcripts were defined as being significantly differentially expressed if they showed a p-value of < 0…	Transcription Analysis Console (TAC) was used for quality control and analysis of the data, the .CEL files were imported into TAC version 4.0.1 (Applied Biosystems, USA) and normalised to the median of all genes, prior to statistical analysis, to identify differentially expressed genes (DEGs). Transcripts were defined as being significantly differentially expressed if they showed a p-value of < 0…	Transcription Analysis Console (TAC) was used for quality control and analysis of the data, the .CEL files were imported into TAC version 4.0.1 (Applied Biosystems, USA) and normalised to the median of all genes, prior to statistical analysis, to identify differentially expressed genes (DEGs). Transcripts were defined as being significantly differentially expressed if they showed a p-value of < 0…
!Sample_platform_id	GPL23159	GPL23159	GPL23159	GPL23159	GPL23159	GPL23159	GPL23159	GPL23159	GPL23159	GPL23159	GPL23159	GPL23159	GPL23159	GPL23159	GPL23159	GPL23159	GPL23159	GPL23159	GPL23159	GPL23159	GPL23159	GPL23159	GPL23159	GPL23159	GPL23159	GPL23159	GPL23159	GPL23159	GPL23159	GPL23159	GPL23159	GPL23159	GPL23159	GPL23159	GPL23159	GPL23159	GPL23159	GPL23159	GPL23159	GPL23159	GPL23159	GPL23159	GPL23159	GPL23159	GPL23159	GPL23159	GPL23159	GPL23159	GPL23159
!Sample_contact_name	Rachel,,Waller	Rachel,,Waller	Rachel,,Waller	Rachel,,Waller	Rachel,,Waller	Rachel,,Waller	Rachel,,Waller	Rachel,,Waller	Rachel,,Waller	Rachel,,Waller	Rachel,,Waller	Rachel,,Waller	Rachel,,Waller	Rachel,,Waller	Rachel,,Waller	Rachel,,Waller	Rachel,,Waller	Rachel,,Waller	Rachel,,Waller	Rachel,,Waller	Rachel,,Waller	Rachel,,Waller	Rachel,,Waller	Rachel,,Waller	Rachel,,Waller	Rachel,,Waller	Rachel,,Waller	Rachel,,Waller	Rachel,,Waller	Rachel,,Waller	Rachel,,Waller	Rachel,,Waller	Rachel,,Waller	Rachel,,Waller	Rachel,,Waller	Rachel,,Waller	Rachel,,Waller	Rachel,,Waller	Rachel,,Waller	Rachel,,Waller	Rachel,,Waller	Rachel,,Waller	Rachel,,Waller	Rachel,,Waller	Rachel,,Waller	Rachel,,Waller	Rachel,,Waller	Rachel,,Waller	Rachel,,Waller
!Sample_contact_email	r.waller@sheffield.ac.uk	r.waller@sheffield.ac.uk	r.waller@sheffield.ac.uk	r.waller@sheffield.ac.uk	r.waller@sheffield.ac.uk	r.waller@sheffield.ac.uk	r.waller@sheffield.ac.uk	r.waller@sheffield.ac.uk	r.waller@sheffield.ac.uk	r.waller@sheffield.ac.uk	r.waller@sheffield.ac.uk	r.waller@sheffield.ac.uk	r.waller@sheffield.ac.uk	r.waller@sheffield.ac.uk	r.waller@sheffield.ac.uk	r.waller@sheffield.ac.uk	r.waller@sheffield.ac.uk	r.waller@sheffield.ac.uk	r.waller@sheffield.ac.uk	r.waller@sheffield.ac.uk	r.waller@sheffield.ac.uk	r.waller@sheffield.ac.uk	r.waller@sheffield.ac.uk	r.waller@sheffield.ac.uk	r.waller@sheffield.ac.uk	r.waller@sheffield.ac.uk	r.waller@sheffield.ac.uk	r.waller@sheffield.ac.uk	r.waller@sheffield.ac.uk	r.waller@sheffield.ac.uk	r.waller@sheffield.ac.uk	r.waller@sheffield.ac.uk	r.waller@sheffield.ac.uk	r.waller@sheffield.ac.uk	r.waller@sheffield.ac.uk	r.waller@sheffield.ac.uk	r.waller@sheffield.ac.uk	r.waller@sheffield.ac.uk	r.waller@sheffield.ac.uk	r.waller@sheffield.ac.uk	r.waller@sheffield.ac.uk	r.waller@sheffield.ac.uk	r.waller@sheffield.ac.uk	r.waller@sheffield.ac.uk	r.waller@sheffield.ac.uk	r.waller@sheffield.ac.uk	r.waller@sheffield.ac.uk	r.waller@sheffield.ac.uk	r.waller@sheffield.ac.uk
!Sample_contact_department	Neuroscience	Neuroscience	Neuroscience	Neuroscience	Neuroscience	Neuroscience	Neuroscience	Neuroscience	Neuroscience	Neuroscience	Neuroscience	Neuroscience	Neuroscience	Neuroscience	Neuroscience	Neuroscience	Neuroscience	Neuroscience	Neuroscience	Neuroscience	Neuroscience	Neuroscience	Neuroscience	Neuroscience	Neuroscience	Neuroscience	Neuroscience	Neuroscience	Neuroscience	Neuroscience	Neuroscience	Neuroscience	Neuroscience	Neuroscience	Neuroscience	Neuroscience	Neuroscience	Neuroscience	Neuroscience	Neuroscience	Neuroscience	Neuroscience	Neuroscience	Neuroscience	Neuroscience	Neuroscience	Neuroscience	Neuroscience	Neuroscience
!Sample_contact_institute	The University of Sheffield	The University of Sheffield	The University of Sheffield	The University of Sheffield	The University of Sheffield	The University of Sheffield	The University of Sheffield	The University of Sheffield	The University of Sheffield	The University of Sheffield	The University of Sheffield	The University of Sheffield	The University of Sheffield	The University of Sheffield	The University of Sheffield	The University of Sheffield	The University of Sheffield	The University of Sheffield	The University of Sheffield	The University of Sheffield	The University of Sheffield	The University of Sheffield	The University of Sheffield	The University of Sheffield	The University of Sheffield	The University of Sheffield	The University of Sheffield	The University of Sheffield	The University of Sheffield	The University of Sheffield	The University of Sheffield	The University of Sheffield	The University of Sheffield	The University of Sheffield	The University of Sheffield	The University of Sheffield	The University of Sheffield	The University of Sheffield	The University of Sheffield	The University of Sheffield	The University of Sheffield	The University of Sheffield	The University of Sheffield	The University of Sheffield	The University of Sheffield	The University of Sheffield	The University of Sheffield	The University of Sheffield	The University of Sheffield
!Sample_contact_address	SITraN, 385A Glossop Road	SITraN, 385A Glossop Road	SITraN, 385A Glossop Road	SITraN, 385A Glossop Road	SITraN, 385A Glossop Road	SITraN, 385A Glossop Road	SITraN, 385A Glossop Road	SITraN, 385A Glossop Road	SITraN, 385A Glossop Road	SITraN, 385A Glossop Road	SITraN, 385A Glossop Road	SITraN, 385A Glossop Road	SITraN, 385A Glossop Road	SITraN, 385A Glossop Road	SITraN, 385A Glossop Road	SITraN, 385A Glossop Road	SITraN, 385A Glossop Road	SITraN, 385A Glossop Road	SITraN, 385A Glossop Road	SITraN, 385A Glossop Road	SITraN, 385A Glossop Road	SITraN, 385A Glossop Road	SITraN, 385A Glossop Road	SITraN, 385A Glossop Road	SITraN, 385A Glossop Road	SITraN, 385A Glossop Road	SITraN, 385A Glossop Road	SITraN, 385A Glossop Road	SITraN, 385A Glossop Road	SITraN, 385A Glossop Road	SITraN, 385A Glossop Road	SITraN, 385A Glossop Road	SITraN, 385A Glossop Road	SITraN, 385A Glossop Road	SITraN, 385A Glossop Road	SITraN, 385A Glossop Road	SITraN, 385A Glossop Road	SITraN, 385A Glossop Road	SITraN, 385A Glossop Road	SITraN, 385A Glossop Road	SITraN, 385A Glossop Road	SITraN, 385A Glossop Road	SITraN, 385A Glossop Road	SITraN, 385A Glossop Road	SITraN, 385A Glossop Road	SITraN, 385A Glossop Road	SITraN, 385A Glossop Road	SITraN, 385A Glossop Road	SITraN, 385A Glossop Road
!Sample_contact_city	SHEFFIELD	SHEFFIELD	SHEFFIELD	SHEFFIELD	SHEFFIELD	SHEFFIELD	SHEFFIELD	SHEFFIELD	SHEFFIELD	SHEFFIELD	SHEFFIELD	SHEFFIELD	SHEFFIELD	SHEFFIELD	SHEFFIELD	SHEFFIELD	SHEFFIELD	SHEFFIELD	SHEFFIELD	SHEFFIELD	SHEFFIELD	SHEFFIELD	SHEFFIELD	SHEFFIELD	SHEFFIELD	SHEFFIELD	SHEFFIELD	SHEFFIELD	SHEFFIELD	SHEFFIELD	SHEFFIELD	SHEFFIELD	SHEFFIELD	SHEFFIELD	SHEFFIELD	SHEFFIELD	SHEFFIELD	SHEFFIELD	SHEFFIELD	SHEFFIELD	SHEFFIELD	SHEFFIELD	SHEFFIELD	SHEFFIELD	SHEFFIELD	SHEFFIELD	SHEFFIELD	SHEFFIELD	SHEFFIELD
!Sample_contact_state	South Yorkshire	South Yorkshire	South Yorkshire	South Yorkshire	South Yorkshire	South Yorkshire	South Yorkshire	South Yorkshire	South Yorkshire	South Yorkshire	South Yorkshire	South Yorkshire	South Yorkshire	South Yorkshire	South Yorkshire	South Yorkshire	South Yorkshire	South Yorkshire	South Yorkshire	South Yorkshire	South Yorkshire	South Yorkshire	South Yorkshire	South Yorkshire	South Yorkshire	South Yorkshire	South Yorkshire	South Yorkshire	South Yorkshire	South Yorkshire	South Yorkshire	South Yorkshire	South Yorkshire	South Yorkshire	South Yorkshire	South Yorkshire	South Yorkshire	South Yorkshire	South Yorkshire	South Yorkshire	South Yorkshire	South Yorkshire	South Yorkshire	South Yorkshire	South Yorkshire	South Yorkshire	South Yorkshire	South Yorkshire	South Yorkshire
!Sample_contact_zip/postal_code	S102HQ	S102HQ	S102HQ	S102HQ	S102HQ	S102HQ	S102HQ	S102HQ	S102HQ	S102HQ	S102HQ	S102HQ	S102HQ	S102HQ	S102HQ	S102HQ	S102HQ	S102HQ	S102HQ	S102HQ	S102HQ	S102HQ	S102HQ	S102HQ	S102HQ	S102HQ	S102HQ	S102HQ	S102HQ	S102HQ	S102HQ	S102HQ	S102HQ	S102HQ	S102HQ	S102HQ	S102HQ	S102HQ	S102HQ	S102HQ	S102HQ	S102HQ	S102HQ	S102HQ	S102HQ	S102HQ	S102HQ	S102HQ	S102HQ
!Sample_contact_country	United Kingdom	United Kingdom	United Kingdom	United Kingdom	United Kingdom	United Kingdom	United Kingdom	United Kingdom	United Kingdom	United Kingdom	United Kingdom	United Kingdom	United Kingdom	United Kingdom	United Kingdom	United Kingdom	United Kingdom	United Kingdom	United Kingdom	United Kingdom	United Kingdom	United Kingdom	United Kingdom	United Kingdom	United Kingdom	United Kingdom	United Kingdom	United Kingdom	United Kingdom	United Kingdom	United Kingdom	United Kingdom	United Kingdom	United Kingdom	United Kingdom	United Kingdom	United Kingdom	United Kingdom	United Kingdom	United Kingdom	United Kingdom	United Kingdom	United Kingdom	United Kingdom	United Kingdom	United Kingdom	United Kingdom	United Kingdom	United Kingdom
!Sample_supplementary_file	ftp://ftp.ncbi.nlm.nih.gov/geo/samples/GSM5661nnn/GSM5661240/suppl/GSM5661240_1-1.CEL.gz	ftp://ftp.ncbi.nlm.nih.gov/geo/samples/GSM5661nnn/GSM5661241/suppl/GSM5661241_2-1.CEL.gz	ftp://ftp.ncbi.nlm.nih.gov/geo/samples/GSM5661nnn/GSM5661242/suppl/GSM5661242_3-1.CEL.gz	ftp://ftp.ncbi.nlm.nih.gov/geo/samples/GSM5661nnn/GSM5661243/suppl/GSM5661243_4-1.CEL.gz	ftp://ftp.ncbi.nlm.nih.gov/geo/samples/GSM5661nnn/GSM5661244/suppl/GSM5661244_5-1.CEL.gz	ftp://ftp.ncbi.nlm.nih.gov/geo/samples/GSM5661nnn/GSM5661245/suppl/GSM5661245_6-1.CEL.gz	ftp://ftp.ncbi.nlm.nih.gov/geo/samples/GSM5661nnn/GSM5661246/suppl/GSM5661246_7-1.CEL.gz	ftp://ftp.ncbi.nlm.nih.gov/geo/samples/GSM5661nnn/GSM5661247/suppl/GSM5661247_8-1.CEL.gz	ftp://ftp.ncbi.nlm.nih.gov/geo/samples/GSM5661nnn/GSM5661248/suppl/GSM5661248_9-1.CEL.gz	ftp://ftp.ncbi.nlm.nih.gov/geo/samples/GSM5661nnn/GSM5661249/suppl/GSM5661249_10-1.CEL.gz	ftp://ftp.ncbi.nlm.nih.gov/geo/samples/GSM5661nnn/GSM5661250/suppl/GSM5661250_11-3.CEL.gz	ftp://ftp.ncbi.nlm.nih.gov/geo/samples/GSM5661nnn/GSM5661251/suppl/GSM5661251_12-3.CEL.gz	ftp://ftp.ncbi.nlm.nih.gov/geo/samples/GSM5661nnn/GSM5661252/suppl/GSM5661252_13-2.CEL.gz	ftp://ftp.ncbi.nlm.nih.gov/geo/samples/GSM5661nnn/GSM5661253/suppl/GSM5661253_14-2.CEL.gz	ftp://ftp.ncbi.nlm.nih.gov/geo/samples/GSM5661nnn/GSM5661254/suppl/GSM5661254_15-3.CEL.gz	ftp://ftp.ncbi.nlm.nih.gov/geo/samples/GSM5661nnn/GSM5661255/suppl/GSM5661255_16-3.CEL.gz	ftp://ftp.ncbi.nlm.nih.gov/geo/samples/GSM5661nnn/GSM5661256/suppl/GSM5661256_17-2.CEL.gz	ftp://ftp.ncbi.nlm.nih.gov/geo/samples/GSM5661nnn/GSM5661257/suppl/GSM5661257_18-2.CEL.gz	ftp://ftp.ncbi.nlm.nih.gov/geo/samples/GSM5661nnn/GSM5661258/suppl/GSM5661258_19-3.CEL.gz	ftp://ftp.ncbi.nlm.nih.gov/geo/samples/GSM5661nnn/GSM5661259/suppl/GSM5661259_20-2.CEL.gz	ftp://ftp.ncbi.nlm.nih.gov/geo/samples/GSM5661nnn/GSM5661260/suppl/GSM5661260_21-3.CEL.gz	ftp://ftp.ncbi.nlm.nih.gov/geo/samples/GSM5661nnn/GSM5661261/suppl/GSM5661261_22-3.CEL.gz	ftp://ftp.ncbi.nlm.nih.gov/geo/samples/GSM5661nnn/GSM5661262/suppl/GSM5661262_23-2.CEL.gz	ftp://ftp.ncbi.nlm.nih.gov/geo/samples/GSM5661nnn/GSM5661263/suppl/GSM5661263_24-3.CEL.gz	ftp://ftp.ncbi.nlm.nih.gov/geo/samples/GSM5661nnn/GSM5661264/suppl/GSM5661264_25-3.CEL.gz	ftp://ftp.ncbi.nlm.nih.gov/geo/samples/GSM5661nnn/GSM5661265/suppl/GSM5661265_26-2.CEL.gz	ftp://ftp.ncbi.nlm.nih.gov/geo/samples/GSM5661nnn/GSM5661266/suppl/GSM5661266_27-2.CEL.gz	ftp://ftp.ncbi.nlm.nih.gov/geo/samples/GSM5661nnn/GSM5661267/suppl/GSM5661267_28-2.CEL.gz	ftp://ftp.ncbi.nlm.nih.gov/geo/samples/GSM5661nnn/GSM5661268/suppl/GSM5661268_29-3.CEL.gz	ftp://ftp.ncbi.nlm.nih.gov/geo/samples/GSM5661nnn/GSM5661269/suppl/GSM5661269_30-2.CEL.gz	ftp://ftp.ncbi.nlm.nih.gov/geo/samples/GSM5661nnn/GSM5661270/suppl/GSM5661270_31.CEL.gz	ftp://ftp.ncbi.nlm.nih.gov/geo/samples/GSM5661nnn/GSM5661271/suppl/GSM5661271_32.CEL.gz	ftp://ftp.ncbi.nlm.nih.gov/geo/samples/GSM5661nnn/GSM5661272/suppl/GSM5661272_33.CEL.gz	ftp://ftp.ncbi.nlm.nih.gov/geo/samples/GSM5661nnn/GSM5661273/suppl/GSM5661273_34.CEL.gz	ftp://ftp.ncbi.nlm.nih.gov/geo/samples/GSM5661nnn/GSM5661274/suppl/GSM5661274_35.CEL.gz	ftp://ftp.ncbi.nlm.nih.gov/geo/samples/GSM5661nnn/GSM5661275/suppl/GSM5661275_36.CEL.gz	ftp://ftp.ncbi.nlm.nih.gov/geo/samples/GSM5661nnn/GSM5661276/suppl/GSM5661276_37.CEL.gz	ftp://ftp.ncbi.nlm.nih.gov/geo/samples/GSM5661nnn/GSM5661277/suppl/GSM5661277_38.CEL.gz	ftp://ftp.ncbi.nlm.nih.gov/geo/samples/GSM5661nnn/GSM5661278/suppl/GSM5661278_39.CEL.gz	ftp://ftp.ncbi.nlm.nih.gov/geo/samples/GSM5661nnn/GSM5661279/suppl/GSM5661279_40.CEL.gz	ftp://ftp.ncbi.nlm.nih.gov/geo/samples/GSM5661nnn/GSM5661280/suppl/GSM5661280_41.CEL.gz	ftp://ftp.ncbi.nlm.nih.gov/geo/samples/GSM5661nnn/GSM5661281/suppl/GSM5661281_42.CEL.gz	ftp://ftp.ncbi.nlm.nih.gov/geo/samples/GSM5661nnn/GSM5661282/suppl/GSM5661282_43.CEL.gz	ftp://ftp.ncbi.nlm.nih.gov/geo/samples/GSM5661nnn/GSM5661283/suppl/GSM5661283_44.CEL.gz	ftp://ftp.ncbi.nlm.nih.gov/geo/samples/GSM5661nnn/GSM5661284/suppl/GSM5661284_45.CEL.gz	ftp://ftp.ncbi.nlm.nih.gov/geo/samples/GSM5661nnn/GSM5661285/suppl/GSM5661285_46.CEL.gz	ftp://ftp.ncbi.nlm.nih.gov/geo/samples/GSM5661nnn/GSM5661286/suppl/GSM5661286_47.CEL.gz	ftp://ftp.ncbi.nlm.nih.gov/geo/samples/GSM5661nnn/GSM5661287/suppl/GSM5661287_48.CEL.gz	ftp://ftp.ncbi.nlm.nih.gov/geo/samples/GSM5661nnn/GSM5661288/suppl/GSM5661288_49.CEL.gz
!Sample_supplementary_file	ftp://ftp.ncbi.nlm.nih.gov/geo/samples/GSM5661nnn/GSM5661240/suppl/GSM5661240_1-1.sst-rma-gene-full.chp.gz	ftp://ftp.ncbi.nlm.nih.gov/geo/samples/GSM5661nnn/GSM5661241/suppl/GSM5661241_2-1.sst-rma-gene-full.chp.gz	ftp://ftp.ncbi.nlm.nih.gov/geo/samples/GSM5661nnn/GSM5661242/suppl/GSM5661242_3-1.sst-rma-gene-full.chp.gz	ftp://ftp.ncbi.nlm.nih.gov/geo/samples/GSM5661nnn/GSM5661243/suppl/GSM5661243_4-1.sst-rma-gene-full.chp.gz	ftp://ftp.ncbi.nlm.nih.gov/geo/samples/GSM5661nnn/GSM5661244/suppl/GSM5661244_5-1.sst-rma-gene-full.chp.gz	ftp://ftp.ncbi.nlm.nih.gov/geo/samples/GSM5661nnn/GSM5661245/suppl/GSM5661245_6-1.sst-rma-gene-full.chp.gz	ftp://ftp.ncbi.nlm.nih.gov/geo/samples/GSM5661nnn/GSM5661246/suppl/GSM5661246_7-1.sst-rma-gene-full.chp.gz	ftp://ftp.ncbi.nlm.nih.gov/geo/samples/GSM5661nnn/GSM5661247/suppl/GSM5661247_8-1.sst-rma-gene-full.chp.gz	ftp://ftp.ncbi.nlm.nih.gov/geo/samples/GSM5661nnn/GSM5661248/suppl/GSM5661248_9-1.sst-rma-gene-full.chp.gz	ftp://ftp.ncbi.nlm.nih.gov/geo/samples/GSM5661nnn/GSM5661249/suppl/GSM5661249_10-1.sst-rma-gene-full.chp.gz	ftp://ftp.ncbi.nlm.nih.gov/geo/samples/GSM5661nnn/GSM5661250/suppl/GSM5661250_11-3.sst-rma-gene-full.chp.gz	ftp://ftp.ncbi.nlm.nih.gov/geo/samples/GSM5661nnn/GSM5661251/suppl/GSM5661251_12-3.sst-rma-gene-full.chp.gz	ftp://ftp.ncbi.nlm.nih.gov/geo/samples/GSM5661nnn/GSM5661252/suppl/GSM5661252_13-2.sst-rma-gene-full.chp.gz	ftp://ftp.ncbi.nlm.nih.gov/geo/samples/GSM5661nnn/GSM5661253/suppl/GSM5661253_14-2.sst-rma-gene-full.chp.gz	ftp://ftp.ncbi.nlm.nih.gov/geo/samples/GSM5661nnn/GSM5661254/suppl/GSM5661254_15-3.sst-rma-gene-full.chp.gz	ftp://ftp.ncbi.nlm.nih.gov/geo/samples/GSM5661nnn/GSM5661255/suppl/GSM5661255_16-3.sst-rma-gene-full.chp.gz	ftp://ftp.ncbi.nlm.nih.gov/geo/samples/GSM5661nnn/GSM5661256/suppl/GSM5661256_17-2.sst-rma-gene-full.chp.gz	ftp://ftp.ncbi.nlm.nih.gov/geo/samples/GSM5661nnn/GSM5661257/suppl/GSM5661257_18-2.sst-rma-gene-full.chp.gz	ftp://ftp.ncbi.nlm.nih.gov/geo/samples/GSM5661nnn/GSM5661258/suppl/GSM5661258_19-3.sst-rma-gene-full.chp.gz	ftp://ftp.ncbi.nlm.nih.gov/geo/samples/GSM5661nnn/GSM5661259/suppl/GSM5661259_20-2.sst-rma-gene-full.chp.gz	ftp://ftp.ncbi.nlm.nih.gov/geo/samples/GSM5661nnn/GSM5661260/suppl/GSM5661260_21-3.sst-rma-gene-full.chp.gz	ftp://ftp.ncbi.nlm.nih.gov/geo/samples/GSM5661nnn/GSM5661261/suppl/GSM5661261_22-3.sst-rma-gene-full.chp.gz	ftp://ftp.ncbi.nlm.nih.gov/geo/samples/GSM5661nnn/GSM5661262/suppl/GSM5661262_23-2.sst-rma-gene-full.chp.gz	ftp://ftp.ncbi.nlm.nih.gov/geo/samples/GSM5661nnn/GSM5661263/suppl/GSM5661263_24-3.sst-rma-gene-full.chp.gz	ftp://ftp.ncbi.nlm.nih.gov/geo/samples/GSM5661nnn/GSM5661264/suppl/GSM5661264_25-3.sst-rma-gene-full.chp.gz	ftp://ftp.ncbi.nlm.nih.gov/geo/samples/GSM5661nnn/GSM5661265/suppl/GSM5661265_26-2.sst-rma-gene-full.chp.gz	ftp://ftp.ncbi.nlm.nih.gov/geo/samples/GSM5661nnn/GSM5661266/suppl/GSM5661266_27-2.sst-rma-gene-full.chp.gz	ftp://ftp.ncbi.nlm.nih.gov/geo/samples/GSM5661nnn/GSM5661267/suppl/GSM5661267_28-2.sst-rma-gene-full.chp.gz	ftp://ftp.ncbi.nlm.nih.gov/geo/samples/GSM5661nnn/GSM5661268/suppl/GSM5661268_29-3.sst-rma-gene-full.chp.gz	ftp://ftp.ncbi.nlm.nih.gov/geo/samples/GSM5661nnn/GSM5661269/suppl/GSM5661269_30-2.sst-rma-gene-full.chp.gz	ftp://ftp.ncbi.nlm.nih.gov/geo/samples/GSM5661nnn/GSM5661270/suppl/GSM5661270_31.sst-rma-gene-full.chp.gz	ftp://ftp.ncbi.nlm.nih.gov/geo/samples/GSM5661nnn/GSM5661271/suppl/GSM5661271_32.sst-rma-gene-full.chp.gz	ftp://ftp.ncbi.nlm.nih.gov/geo/samples/GSM5661nnn/GSM5661272/suppl/GSM5661272_33.sst-rma-gene-full.chp.gz	ftp://ftp.ncbi.nlm.nih.gov/geo/samples/GSM5661nnn/GSM5661273/suppl/GSM5661273_34.sst-rma-gene-full.chp.gz	ftp://ftp.ncbi.nlm.nih.gov/geo/samples/GSM5661nnn/GSM5661274/suppl/GSM5661274_35.sst-rma-gene-full.chp.gz	ftp://ftp.ncbi.nlm.nih.gov/geo/samples/GSM5661nnn/GSM5661275/suppl/GSM5661275_36.sst-rma-gene-full.chp.gz	ftp://ftp.ncbi.nlm.nih.gov/geo/samples/GSM5661nnn/GSM5661276/suppl/GSM5661276_37.sst-rma-gene-full.chp.gz	ftp://ftp.ncbi.nlm.nih.gov/geo/samples/GSM5661nnn/GSM5661277/suppl/GSM5661277_38.sst-rma-gene-full.chp.gz	ftp://ftp.ncbi.nlm.nih.gov/geo/samples/GSM5661nnn/GSM5661278/suppl/GSM5661278_39.sst-rma-gene-full.chp.gz	ftp://ftp.ncbi.nlm.nih.gov/geo/samples/GSM5661nnn/GSM5661279/suppl/GSM5661279_40.sst-rma-gene-full.chp.gz	ftp://ftp.ncbi.nlm.nih.gov/geo/samples/GSM5661nnn/GSM5661280/suppl/GSM5661280_41.sst-rma-gene-full.chp.gz	ftp://ftp.ncbi.nlm.nih.gov/geo/samples/GSM5661nnn/GSM5661281/suppl/GSM5661281_42.sst-rma-gene-full.chp.gz	ftp://ftp.ncbi.nlm.nih.gov/geo/samples/GSM5661nnn/GSM5661282/suppl/GSM5661282_43.sst-rma-gene-full.chp.gz	ftp://ftp.ncbi.nlm.nih.gov/geo/samples/GSM5661nnn/GSM5661283/suppl/GSM5661283_44.sst-rma-gene-full.chp.gz	ftp://ftp.ncbi.nlm.nih.gov/geo/samples/GSM5661nnn/GSM5661284/suppl/GSM5661284_45.sst-rma-gene-full.chp.gz	ftp://ftp.ncbi.nlm.nih.gov/geo/samples/GSM5661nnn/GSM5661285/suppl/GSM5661285_46.sst-rma-gene-full.chp.gz	ftp://ftp.ncbi.nlm.nih.gov/geo/samples/GSM5661nnn/GSM5661286/suppl/GSM5661286_47.sst-rma-gene-full.chp.gz	ftp://ftp.ncbi.nlm.nih.gov/geo/samples/GSM5661nnn/GSM5661287/suppl/GSM5661287_48.sst-rma-gene-full.chp.gz	ftp://ftp.ncbi.nlm.nih.gov/geo/samples/GSM5661nnn/GSM5661288/suppl/GSM5661288_49.sst-rma-gene-full.chp.gz
!Sample_data_row_count	24351	24351	24351	24351	24351	24351	24351	24351	24351	24351	24351	24351	24351	24351	24351	24351	24351	24351	24351	24351	24351	24351	24351	24351	24351	24351	24351	24351	24351	24351	24351	24351	24351	24351	24351	24351	24351	24351	24351	24351	24351	24351	24351	24351	24351	24351	24351	24351	24351
!series_matrix_table_begin
ID_REF	GSM5661240	GSM5661241	GSM5661242	GSM5661243	GSM5661244	GSM5661245	GSM5661246	GSM5661247	GSM5661248	GSM5661249	GSM5661250	GSM5661251	GSM5661252	GSM5661253	GSM5661254	GSM5661255	GSM5661256	GSM5661257	GSM5661258	GSM5661259	GSM5661260	GSM5661261	GSM5661262	GSM5661263	GSM5661264	GSM5661265	GSM5661266	GSM5661267	GSM5661268	GSM5661269	GSM5661270	GSM5661271	GSM5661272	GSM5661273	GSM5661274	GSM5661275	GSM5661276	GSM5661277	GSM5661278	GSM5661279	GSM5661280	GSM5661281	GSM5661282	GSM5661283	GSM5661284	GSM5661285	GSM5661286	GSM5661287	GSM5661288
AFFX-BkGr-GC03_st	5.67692	4.99731	5.68377	5.84711	5.25444	5.82721	5.83499	6.46543	6.10789	5.8085	6.22558	5.79189	6.03139	5.38644	5.82721	5.79443	5.262	6.18533	5.68064	5.22827	5.75921	5.12216	5.89112	5.71852	5.19702	5.51078	6.46498	5.79478	5.2347	6.1904	5.80343	5.47977	5.25903	5.76661	5.95505	6.33128	5.365	5.58719	6.01697	5.73566	5.42949	6.01147	5.82968	4.70772	5.64764	5.67591	5.8269	5.82968	4.71076
AFFX-BkGr-GC04_st	5.34296	5.33741	5.51593	5.4735	5.26593	5.34772	5.35606	5.40146	5.46942	5.27122	5.47202	5.41021	5.23558	5.3881	5.44066	5.47426	5.38682	5.35576	5.28914	5.25567	5.30958	5.38087	5.37993	5.59394	5.39097	5.44201	5.46919	5.43858	5.30795	5.36298	5.7415	5.8719	5.92729	5.82962	5.82651	5.85324	5.95037	5.86131	6.08153	5.83869	5.69542	5.64688	5.7415	5.7415	5.67881	5.62284	5.7415	5.7415	5.80902
AFFX-BkGr-GC05_st	5.49623	5.43389	5.36414	5.40217	5.2896	5.33241	5.26886	5.33157	5.32605	5.34074	5.41042	5.47195	5.44729	5.35796	5.44866	5.50626	5.39959	5.38099	5.44195	5.38217	5.34456	5.30551	5.38148	5.38938	5.38508	5.33568	5.42549	5.42736	5.32427	5.53557	5.70207	5.60626	5.78293	5.68828	5.76335	5.68695	5.66417	5.74153	5.68329	5.70469	5.65292	5.60623	5.70207	5.70207	5.53618	5.53331	5.70207	5.70207	5.56391
AFFX-BkGr-GC06_st	5.23584	5.24686	5.35081	5.31436	5.227	5.28231	5.07405	5.28778	5.24954	5.24054	5.21495	5.31345	5.34272	5.13335	5.17825	5.31734	5.25474	5.22026	5.36954	5.21153	5.22783	5.27686	5.25362	5.2565	5.3233	5.22666	5.32835	5.27599	5.12335	5.236	5.75653	5.65835	5.74396	5.73878	5.87908	5.7509	5.80861	5.79881	5.72613	5.62674	5.58462	5.51881	5.75653	5.75653	5.46562	5.43453	5.75653	5.75653	5.77273
AFFX-BkGr-GC07_st	5.31721	5.26538	5.36207	5.24555	5.14552	5.274	5.21852	5.16746	5.43854	5.2575	5.21391	5.31162	5.31978	5.27583	5.18323	5.29674	5.35855	5.11764	5.36666	5.37655	5.25613	5.29887	5.29631	5.29049	5.25303	5.35352	5.40783	5.21839	5.24505	5.32458	5.53579	5.59616	5.68052	5.58709	5.62466	5.54163	5.59533	5.5288	5.52456	5.58094	5.342	5.48752	5.53579	5.53579	5.37704	5.41298	5.53579	5.53579	5.25886
AFFX-BkGr-GC08_st	4.71997	4.19258	4.54676	4.28681	4.40417	4.30581	4.0864	3.84832	4.6046	4.11889	4.16907	4.26822	4.37379	3.73791	3.846	4.27559	4.47078	3.97003	4.87584	4.42013	4.29135	4.18314	4.31971	4.28493	4.17779	4.65895	4.35304	4.26042	4.46853	4.07446	4.40738	4.20407	4.4963	4.2678	4.32483	3.8534	4.4486	4.04727	3.96222	4.07879	3.64765	4.0427	4.27257	4.18294	3.99878	3.82308	4.27257	4.27257	4.2257
AFFX-BkGr-GC09_st	4.42128	3.96198	4.10157	3.90825	3.99982	3.85944	3.80991	3.50764	4.16404	3.71706	3.68863	3.85168	3.77897	3.30799	3.44262	3.96612	3.90068	3.55468	4.50089	4.13088	4.0186	3.78188	4.02417	3.85342	3.88824	4.21886	3.88488	3.93437	4.0771	3.83684	3.86987	3.67702	4.04129	3.62054	3.75233	3.48521	3.8406	3.58186	3.50166	3.5248	3.34755	3.80284	3.75368	3.75368	3.59829	3.44897	3.75368	3.75368	3.79422
AFFX-BkGr-GC10_st	4.02488	3.63443	3.97642	3.69804	3.73476	3.61464	3.51496	3.26166	3.98217	3.34299	3.54676	3.57943	3.53861	3.10855	3.14477	3.70122	3.59633	3.36559	4.05325	3.88445	3.70803	3.54679	3.87807	3.62451	3.52217	3.95809	3.67959	3.66145	3.60351	3.50798	3.37811	3.3938	3.60787	3.27421	3.48321	3.17427	3.4936	3.17373	3.1993	3.14701	3.10913	3.33176	3.25632	3.19563	3.30972	3.20476	3.25632	3.25632	3.48555
AFFX-BkGr-GC11_st	3.71422	3.33401	3.56824	3.27529	3.35349	3.26524	3.16933	2.94571	3.61998	2.99216	3.10728	3.23118	3.20573	2.82398	2.91317	3.35845	3.23312	3.03597	3.62505	3.48007	3.37671	3.22936	3.44327	3.31742	3.2639	3.66103	3.49274	3.31194	3.33874	3.26379	3.25565	3.0717	3.32102	3.12294	3.18718	2.90897	3.17554	3.00952	2.96278	2.92635	2.86114	3.07286	3.09259	3.02903	3.05594	2.97742	3.09259	3.07047	3.28288
AFFX-BkGr-GC12_st	3.5095	3.12862	3.46308	3.0587	3.13904	3.04731	2.95233	2.87226	3.23572	2.86954	2.95871	3.06652	2.99685	2.72469	2.7926	3.25685	3.05841	2.87917	3.4075	3.30214	3.25414	3.0808	3.18164	3.1165	3.14184	3.33927	3.1841	3.13923	3.14563	3.07011	3.01438	3.00035	3.27485	2.9281	3.05136	2.84847	3.08375	2.88174	2.92059	2.78299	2.71899	2.88546	2.94682	2.87279	2.98652	2.83858	2.94682	2.94682	3.14186
AFFX-BkGr-GC13_st	3.12326	2.83418	3.17355	2.79289	2.81252	2.69789	2.7246	2.62881	2.92981	2.62649	2.74852	2.8195	2.68821	2.52338	2.65885	2.85148	2.8397	2.66629	3.1809	2.95064	2.86188	2.81609	2.87441	2.86215	2.87859	2.90523	2.82647	2.75567	2.82564	2.85009	2.86487	2.76594	3.00351	2.71343	2.82206	2.60626	2.79901	2.62801	2.73436	2.59497	2.53943	2.68941	2.7314	2.70164	2.73213	2.64167	2.7314	2.7314	2.79501
AFFX-BkGr-GC14_st	2.83158	2.72702	2.89941	2.60902	2.63914	2.55485	2.55701	2.5269	2.6561	2.48936	2.564	2.6657	2.57093	2.42627	2.53553	2.65133	2.6387	2.50223	2.92274	2.73347	2.73752	2.66019	2.67818	2.66022	2.73073	2.73847	2.66047	2.63167	2.68201	2.66498	2.77121	2.69713	3.02541	2.66588	2.71621	2.58689	2.72708	2.58736	2.66949	2.56652	2.43989	2.60563	2.66025	2.63461	2.64181	2.54937	2.66025	2.65308	2.70683
AFFX-BkGr-GC15_st	2.68581	2.61868	2.78312	2.52935	2.56519	2.4784	2.52458	2.48498	2.57632	2.46411	2.51901	2.57274	2.51587	2.43237	2.51246	2.641	2.57763	2.49042	2.86701	2.63578	2.6128	2.57961	2.62061	2.60913	2.63899	2.61086	2.60048	2.56227	2.60275	2.60125	2.6772	2.63469	2.79899	2.60585	2.63603	2.53488	2.65236	2.52971	2.61591	2.52215	2.40881	2.50436	2.56044	2.5103	2.53762	2.47729	2.56044	2.56044	2.63746
AFFX-BkGr-GC16_st	2.72258	2.67535	2.88938	2.61761	2.64885	2.55581	2.60785	2.57663	2.64845	2.53895	2.59447	2.6862	2.58607	2.54282	2.60561	2.6533	2.66137	2.57334	2.88855	2.76998	2.67329	2.65909	2.72105	2.6738	2.71737	2.72048	2.66787	2.65013	2.66198	2.69788	2.74798	2.71779	2.91393	2.65164	2.72318	2.5961	2.71254	2.59498	2.70678	2.58676	2.50273	2.6002	2.64827	2.61755	2.65912	2.56462	2.64827	2.64287	2.72762
AFFX-BkGr-GC17_st	2.73921	2.68088	2.88181	2.61184	2.66226	2.60432	2.6334	2.59255	2.66342	2.56223	2.62289	2.68685	2.62111	2.55792	2.63637	2.67347	2.72264	2.59738	2.89563	2.78245	2.72017	2.69263	2.71183	2.69216	2.73658	2.72023	2.69919	2.65819	2.68664	2.73869	2.85963	2.75205	2.99315	2.6891	2.78012	2.67421	2.74655	2.67526	2.77253	2.63703	2.57032	2.6139	2.68461	2.69671	2.66453	2.61576	2.69289	2.70937	2.78145
AFFX-BkGr-GC18_st	2.81459	2.80101	3.02703	2.72935	2.78915	2.71177	2.7422	2.70106	2.74899	2.66901	2.72868	2.83658	2.76586	2.68302	2.77628	2.79946	2.85748	2.71462	3.03906	2.90711	2.84963	2.83678	2.84382	2.8171	2.89325	2.8326	2.82352	2.76095	2.79631	2.89062	3.01301	2.94084	3.16994	2.88024	2.93936	2.8112	2.899	2.82338	2.90251	2.78481	2.69502	2.74178	2.83265	2.79602	2.78417	2.70674	2.86219	2.84244	2.84813
AFFX-BkGr-GC19_st	4.94424	5.00084	5.0105	4.97859	5.00611	4.95089	4.95523	4.9731	4.94127	4.94131	4.98152	5.01269	4.97644	4.95649	4.99057	4.99217	4.99137	4.95647	5.0418	4.97704	4.99351	4.96282	4.97226	5.02185	5.02571	4.9884	5.02993	4.92686	5.00031	4.97532	5.28557	5.33764	5.39132	5.28673	5.33828	5.33318	5.34922	5.32138	5.33165	5.30571	5.00626	5.03131	5.28557	5.28557	5.06365	5.06753	5.28557	5.28557	5.11568
AFFX-BkGr-GC20_st	4.95793	4.96864	5.01024	4.99733	4.97635	4.92004	4.96411	4.93453	4.91229	4.94929	4.98773	5.00086	4.95753	4.93414	5.00148	4.95484	4.97358	4.96575	4.97551	4.96079	4.98083	4.9884	4.95437	4.9792	5.02324	4.93429	4.99784	4.93445	4.96328	4.95826	5.3453	5.31956	5.38826	5.3458	5.31832	5.25507	5.31521	5.31236	5.32287	5.30534	4.97577	4.97991	5.3453	5.3453	4.97437	4.98616	5.3453	5.3453	5.00891
AFFX-BkGr-GC21_st	5.07253	5.05358	5.0141	5.05442	5.05338	5.04916	5.02461	5.16083	5.03316	5.04144	5.01812	5.06814	5.02309	5.08806	5.05137	5.04727	5.05278	5.04532	5.04078	5.01901	5.08622	5.06035	5.01664	5.02746	5.07224	5.01783	5.02869	4.95951	5.02307	5.03359	5.41645	5.49496	5.51888	5.50032	5.49146	5.48196	5.4835	5.4548	5.49412	5.45645	5.13492	5.16337	5.41645	5.41645	5.182	5.16161	5.41645	5.41645	5.13996
AFFX-BkGr-GC22_st	5.03248	5.0872	5.11183	5.03594	5.15775	5.03339	5.05598	5.03958	5.01407	5.07296	5.05905	5.10361	5.07786	5.11396	5.07117	5.0761	5.11483	5.09773	5.09526	5.0837	5.10805	5.11636	5.05761	5.10721	5.11418	5.06266	5.14876	5.0174	5.07375	5.06667	5.39398	5.49024	5.49849	5.4767	5.47204	5.39206	5.47673	5.38335	5.50107	5.4205	5.13687	5.10898	5.39398	5.39398	5.12708	5.14779	5.39398	5.39398	5.11348
AFFX-BkGr-GC23_st	5.13644	5.14441	5.17738	5.09814	5.17904	5.1009	5.18547	5.16592	5.15296	5.16724	5.14865	5.20222	5.19624	5.22121	5.19408	5.1687	5.16469	5.23425	5.1649	5.15965	5.14373	5.16088	5.16983	5.12751	5.19789	5.16162	5.1843	5.06963	5.12061	5.14893	5.59659	5.65752	5.64888	5.6603	5.62116	5.56692	5.67638	5.63152	5.64527	5.62685	5.32619	5.31775	5.59659	5.59659	5.3228	5.31573	5.59659	5.59659	5.34203
AFFX-BkGr-GC24_st	5.18746	5.30485	5.18675	5.23965	5.26081	5.27143	5.24739	5.23718	5.209	5.27044	5.16917	5.19965	5.24874	5.39822	5.23863	5.13821	5.22565	5.2186	5.20045	5.25866	5.25074	5.27473	5.25763	5.21395	5.2892	5.19685	5.28647	5.06745	5.13488	5.14835	5.58988	5.63433	5.63506	5.62924	5.63167	5.51204	5.74772	5.67208	5.71966	5.59702	5.48458	5.50455	5.58988	5.58988	5.50242	5.45421	5.58988	5.58988	5.45817
AFFX-BkGr-GC25_st	3.60858	3.7198	3.79736	3.7199	3.7232	3.74436	3.74846	3.72807	3.76467	3.75731	3.76185	3.75731	3.74217	3.75422	3.76703	3.78414	3.7243	3.7747	3.7243	3.77729	3.73397	3.77974	3.69832	3.76025	3.74436	3.74464	3.74028	3.77401	3.76429	3.77349	4.48794	4.08449	4.05509	4.05951	4.08343	4.06234	4.05858	4.05824	4.03788	4.05483	4.27495	4.27891	4.47831	4.4846	4.26018	4.28095	4.47831	4.47831	4.2925
AFFX-r2-Bs-dap-5_st	12.0803	8.59879	9.14252	8.73007	10.3418	9.92168	7.26921	6.39622	10.009	6.92009	9.88115	9.8394	9.1669	7.90383	8.06694	10.795	10.1349	9.96746	12.1628	10.6199	10.5693	9.73979	11.8684	9.98203	9.13071	12.4113	10.902	11.0551	11.3369	10.1204	7.86392	5.97953	7.72863	6.07997	6.69973	6.76258	6.82523	6.09389	6.14861	5.79725	6.37731	7.03129	5.465	6.19718	7.42715	6.02126	8.13541	5.76669	9.78137
AFFX-r2-Bs-lys-5_st	8.77813	5.37755	5.83101	5.38559	7.62351	6.51188	4.82824	4.67005	6.64898	4.12393	6.99848	6.08097	5.27275	4.66065	5.12628	7.61571	5.31698	5.88121	8.07536	6.76769	6.74312	7.11599	7.46374	7.10739	5.90515	9.33079	7.87147	6.6414	6.77124	6.63763	3.60112	4.03058	3.92362	4.02158	3.94573	4.05193	3.43339	3.54375	3.72904	3.30422	4.09973	4.01939	3.08741	3.56172	3.86888	3.51274	3.44299	3.23542	3.65854
AFFX-r2-Bs-phe-5_st	10.5812	7.07904	6.24965	8.11654	9.44333	8.04511	6.47389	4.78511	9.1584	4.31006	8.07659	7.2282	6.05946	5.74982	5.53795	9.70238	6.85458	7.92603	9.84161	7.96613	8.39763	7.03745	9.15611	7.07334	8.00728	10.0584	8.58418	9.18745	9.78929	7.59653	6.30884	4.55256	5.5724	4.78212	4.4991	4.51041	4.11107	3.99304	4.44845	4.61028	4.1252	4.6952	3.19359	3.6781	4.29535	3.86012	5.753	4.11421	6.47188
AFFX-r2-Bs-thr-5_s_st	10.6207	5.78013	5.58637	4.85597	6.27099	7.02594	4.50241	4.07575	5.23646	4.64175	7.77442	7.85198	7.89573	6.59197	6.25131	8.84466	6.24674	8.63454	10.1143	8.11133	8.42324	7.38449	9.18108	7.55961	7.77051	11.307	9.78372	8.68883	9.01209	7.94468	6.50071	5.22202	5.33235	5.69199	6.129	5.59216	5.97487	4.78138	5.5585	5.75148	5.36959	6.34363	4.93821	4.42655	6.08091	4.51902	6.75099	4.53856	6.56432
AFFX-r2-Ec-bioB-5_at	10.0612	8.89831	9.57932	8.04069	9.3221	8.81258	8.6895	8.77406	8.02247	7.52897	8.47539	8.7575	7.04414	7.31583	8.32346	8.81087	8.77427	7.80551	10.357	7.39302	9.15631	9.11509	8.2357	8.73107	8.88825	9.6826	8.78566	8.21592	9.40695	8.42141	9.50272	9.45987	9.81886	9.07562	9.38203	8.36996	9.12073	8.75114	9.16945	8.34835	8.81252	8.83972	9.36861	9.04115	9.12136	8.83815	9.33321	8.79319	9.46387
AFFX-r2-Ec-bioC-5_at	11.2251	10.2811	10.8628	9.56728	10.481	9.93103	10.0876	9.94159	9.85105	9.17863	9.51031	10.0836	8.38541	8.58814	9.51317	9.94522	10.2287	8.96222	11.7119	9.37494	10.3108	10.5872	9.73574	9.89274	10.2429	10.9882	10.0516	9.48093	10.8811	9.70899	10.8989	10.7419	11.1263	10.1773	10.5872	9.53958	10.4358	10.0385	10.3192	9.69237	9.93324	9.88308	10.6723	10.2185	10.11	9.88415	10.6623	9.93174	10.8063
AFFX-r2-Ec-bioD-5_at	12.4286	11.8493	12.3002	10.9485	12.0401	11.3141	11.6193	11.5663	11.1394	10.665	11.0391	11.7121	10.082	10.2256	11.1777	11.3318	12.0914	10.5578	13.1725	11.0467	11.9465	12.1906	11.1013	11.4352	11.7322	12.1952	11.5543	11.0295	12.3289	11.3538	12.4897	12.2396	12.583	11.5957	12.1228	11.1512	12.0873	11.5454	11.9558	11.1308	11.5943	11.4095	12.1159	11.6195	11.5995	11.418	12.2586	11.4554	12.3355
AFFX-r2-P1-cre-5_at	13.1443	12.745	13.1323	12.1405	12.7788	12.215	12.6483	12.2913	12.1008	11.8784	12.1264	12.6498	11.6574	11.4815	12.2719	12.2921	13.1141	11.7658	14.0597	12.6656	12.8652	13.1798	12.2644	12.3739	12.6421	13.022	12.4533	12.0721	13.2707	12.3491	13.4373	13.1111	13.4356	12.4682	13.0279	12.0671	13.017	12.4354	12.7445	12.1611	12.4491	12.3486	13.0001	12.4867	12.4665	12.3428	13.0321	12.3749	13.3344
ERCCmix1step1	6.84008	5.73715	5.33832	6.20231	5.96327	6.27973	5.87969	5.05693	6.54415	5.7523	5.38267	5.30164	6.13172	5.03713	4.65336	5.81056	5.94835	5.39985	6.46249	6.04018	6.40083	5.92867	6.52342	5.70544	5.21116	6.82322	5.57435	6.15235	6.41707	5.67023	4.7135	5.10325	5.09923	4.91747	4.92398	4.80785	5.10342	4.7889	4.87525	4.97793	4.38128	4.64526	4.47487	4.69316	4.65906	4.46692	5.1334	4.67322	5.27196
ERCCmix1step10	4.3208	3.86646	4.36657	3.66994	3.92718	4.09856	3.60725	3.77253	3.73582	3.43511	3.83295	3.83121	3.36566	3.32029	3.57025	3.89877	3.85989	3.67643	3.97535	3.57196	3.89875	3.6001	4.04924	3.68908	4.01476	3.61305	3.54879	3.83033	3.83665	3.72267	3.18756	3.53864	3.79614	3.33302	3.49451	3.15129	3.85726	3.47213	3.54625	3.28057	3.53775	3.35941	3.1829	3.16929	3.36326	3.05106	3.22599	3.23479	3.41555
ERCCmix1step11	9.92607	8.84506	9.15076	8.3289	9.31559	9.00827	8.53565	7.93436	8.91333	8.14775	8.64439	8.95822	8.32602	7.11265	8.46919	8.92523	8.95714	8.36537	10.5436	8.99434	9.34244	8.82165	9.13196	8.59672	8.58027	9.50225	8.96112	8.83629	9.53249	8.53098	6.07099	5.65942	6.93771	5.41399	5.85964	5.79146	5.97327	5.22164	5.70677	5.17121	5.70213	5.80487	5.36313	5.24316	6.25095	5.19101	6.03186	5.15741	6.89588
ERCCmix1step12	4.59198	4.34126	4.72425	4.07201	4.6672	4.95043	3.92887	3.95582	3.97586	3.84816	4.4267	4.48185	3.52858	3.6281	4.28313	4.83556	4.12537	3.92789	4.84912	3.99546	4.71192	4.03129	4.24321	4.4428	4.33748	4.55131	4.54241	4.2836	4.85477	3.95119	3.51922	3.72667	4.08097	3.76303	3.62851	3.71281	3.49439	3.90195	3.81726	3.46624	3.81194	3.25297	3.52944	3.63429	3.32841	3.3401	3.58127	3.53844	3.21202
ERCCmix1step13	4.60168	4.02701	4.6276	3.75936	4.70013	4.65363	3.71991	3.73737	3.86399	3.76624	4.41982	4.52543	3.66098	3.44992	3.93535	4.59875	4.26387	3.52403	4.71289	3.50891	4.34992	4.11183	4.0521	4.261	4.17587	4.59263	4.38643	4.00044	4.43683	3.85871	3.54259	3.80575	3.85188	3.36975	3.40085	3.57063	3.1631	3.49071	3.55665	3.3461	3.56373	3.35001	3.38031	3.35872	3.24091	3.27112	3.40004	3.28577	3.44898
ERCCmix1step14	5.42144	4.77875	5.06132	4.38363	5.05211	5.28702	4.367	4.47724	4.77724	4.37122	5.05856	4.74125	4.10922	4.05065	4.58846	5.00771	4.55522	4.17744	5.28697	4.20934	5.07701	4.51507	4.91177	4.81264	4.54353	5.22026	4.90779	4.6244	5.16499	4.48262	4.01321	4.34798	4.28451	4.34793	4.09118	4.32707	4.08297	4.10768	4.05077	4.10371	4.0158	3.70559	4.00854	3.9868	3.81434	3.40691	4.0622	4.01321	3.77507
ERCCmix1step15	4.83108	4.15051	4.65153	4.00509	4.69234	4.47533	3.98049	3.94904	4.27238	3.79523	4.36911	4.32092	3.67413	3.50238	3.93038	4.41311	4.00478	3.96309	5.05135	4.05122	4.48573	4.10554	4.37738	4.12812	4.04675	4.37103	4.61029	4.12186	4.77994	3.82198	3.50923	3.8327	3.7668	3.64779	3.59345	3.55109	3.42351	3.49274	3.7937	3.4483	3.76524	3.62357	3.32011	3.6374	3.61914	3.34068	3.47621	3.47012	3.40797
ERCCmix1step16	4.22742	3.80793	4.66154	3.68611	4.41756	4.56402	3.92112	3.96229	3.66332	3.86629	4.5494	4.4019	3.62837	3.34744	3.89664	4.37981	3.77067	3.75302	4.41782	3.56698	4.34842	3.80212	4.08566	4.23823	4.13191	3.93797	4.27021	3.8684	4.65518	3.89061	3.45232	3.67444	4.02447	3.75071	3.5535	3.4921	3.44508	3.43438	3.53688	3.43273	3.75161	3.38472	3.21404	3.51666	3.50122	3.31437	3.66552	3.38021	3.32479
ERCCmix1step17	4.96837	3.84434	4.47393	3.62053	4.59397	4.52514	3.69664	3.80027	3.88414	3.5301	4.10152	3.99437	3.36811	3.39417	3.78677	4.41163	3.76793	3.5881	4.48826	3.71799	4.27506	4.0813	4.09939	3.93616	3.73105	4.47104	4.28788	4.19886	4.58075	3.74507	3.29974	3.39469	4.04366	3.5196	3.60539	3.65045	3.30511	3.74203	3.34987	3.40387	3.52837	3.25092	3.39509	3.30406	3.33487	2.98765	3.27632	3.49057	3.33988
ERCCmix1step18	4.41195	4.03435	4.8687	3.88254	4.54609	4.67243	3.8616	3.69443	4.0787	3.6462	4.24995	4.10422	3.68726	3.46975	3.7836	4.24259	3.85248	3.68936	4.73095	3.75356	4.06985	3.88638	4.20361	3.85175	4.35567	4.10801	4.28035	4.02023	4.36047	3.77094	3.54548	3.81553	4.10121	4.06732	3.43621	3.69874	3.3623	3.58509	3.90992	3.24458	3.93324	3.37189	3.65075	3.45557	3.79607	3.20033	3.52316	3.44476	3.65937
ERCCmix1step19	6.07091	5.26021	5.76905	5.27619	6.264	6.19836	5.44969	5.26264	5.46617	5.14329	5.63536	5.88037	4.85926	4.61777	5.12308	5.57835	5.41217	5.33306	6.2043	5.13879	6.01314	5.53871	5.80808	5.48812	5.2853	5.92594	5.6089	5.43224	6.08684	5.3274	4.56438	4.85969	4.99368	4.64057	4.66004	4.64718	4.6583	4.65164	4.72605	4.54716	4.72123	4.13426	4.21598	4.17286	4.23277	4.11999	4.51995	4.14932	4.20608
ERCCmix1step2	7.90292	7.69115	7.50573	7.73352	7.14018	7.66083	7.26316	7.09536	8.56416	7.66507	7.00003	7.56738	8.52065	7.05133	6.54599	7.47292	7.73965	7.23114	8.46463	8.68773	8.08989	7.81954	8.70377	7.43301	7.07852	9.38028	7.33544	8.03876	7.89501	7.23503	7.3219	7.159	6.72273	6.90924	6.96439	6.9417	6.90056	6.51875	6.80371	7.05787	6.57172	6.99532	6.70287	6.67253	6.66881	6.01605	7.50468	6.68882	7.99112
ERCCmix1step20	5.08398	4.22419	4.81492	4.24491	4.97782	5.10509	4.24336	4.40467	4.27141	4.3021	4.53165	4.80928	3.92919	3.70673	4.02131	4.8032	4.5367	4.28894	4.67095	4.14259	4.61648	4.50886	4.60302	4.59468	4.55655	4.46966	4.58252	4.39069	5.1709	4.20002	4.06838	4.03263	4.16282	4.24317	4.09474	4.22102	3.96153	4.09085	3.94825	3.9647	3.97779	3.98049	3.7404	4.08563	3.96661	3.86592	3.89285	4.15913	3.82116
ERCCmix1step21	4.56472	4.3496	4.5498	4.55969	4.56993	4.4097	4.3034	4.14166	4.68306	4.73126	4.17303	4.37023	4.48657	4.22745	4.1715	4.10963	4.24389	4.36433	4.64826	4.76265	4.4105	4.91615	4.89281	4.1883	4.39178	4.8135	4.23417	4.34714	4.91231	4.61828	4.97969	4.06039	4.55654	4.14254	4.47048	4.33169	4.5749	4.01931	4.19118	4.36446	3.88256	4.2306	4.68881	4.12354	4.30258	3.86673	4.66993	4.56408	4.6352
ERCCmix1step22	5.35107	4.67369	5.54567	4.60167	4.8864	5.0319	4.72278	4.47494	4.89146	4.5344	4.54224	5.07963	5.00297	4.22144	4.42133	4.87712	5.75238	4.87069	5.73508	5.44671	5.24445	4.90254	5.58173	4.65026	4.74607	5.17612	4.74224	4.93001	5.05185	4.84465	4.52027	4.66593	5.3345	4.64454	4.4953	4.5735	4.83243	4.3771	5.00333	4.34207	4.07055	4.19158	4.65616	4.32011	3.84707	4.44129	4.42793	4.56757	5.12819
ERCCmix1step3	4.97387	4.40943	5.32088	4.41856	4.56023	4.33182	4.51312	4.22047	5.2985	4.43812	4.55412	4.08255	4.39485	4.38064	4.4933	4.65946	4.5198	4.12889	4.81363	5.06265	4.77245	4.48981	4.82235	4.39889	4.51683	4.99747	4.63279	4.72695	5.12705	4.48759	4.09781	3.78336	4.30572	3.66644	4.32225	3.75076	4.30128	4.0199	3.84888	4.15818	3.97851	4.04415	3.93303	3.84492	4.19545	4.02834	3.84567	4.2479	4.40293
ERCCmix1step4	6.16343	5.6955	5.91103	5.49786	5.62386	5.71128	5.42557	4.83732	6.42255	5.66708	5.01875	5.41918	5.72663	4.74359	4.81859	5.28018	5.70178	5.23326	6.43807	7.00998	5.62289	5.5188	6.4823	5.13937	5.62943	6.10728	5.02647	5.5534	6.15584	5.59935	4.64161	4.85267	4.7868	4.75687	5.00545	4.60634	4.92705	4.25972	4.80534	4.65011	4.44749	4.70595	4.91129	4.60373	4.9341	4.15775	4.88917	4.82275	5.93256
ERCCmix1step5	4.8932	4.47356	5.34943	4.31062	4.2437	4.25292	3.99919	3.64608	4.60227	4.2147	4.00314	4.20394	4.27439	3.73241	4.03971	4.31749	4.64224	3.44308	4.96277	5.86842	4.7473	4.3646	5.01697	4.14193	4.44968	4.3402	4.14488	4.14052	4.61463	4.69336	4.55028	4.09445	5.3966	4.00582	4.54048	3.71128	4.61666	4.11035	4.00351	4.47712	4.13744	4.00296	4.18601	3.49293	4.38595	4.02876	4.07032	3.96603	4.99109
ERCCmix1step6	4.57959	4.1779	4.47597	4.66942	4.12539	4.24639	3.95612	3.22189	3.99071	3.93105	3.99584	3.78429	3.92769	3.50284	3.59438	3.99363	3.99884	4.14369	4.40335	4.36266	4.00251	4.01021	4.44823	3.88831	3.45718	4.6142	3.79484	3.8394	3.52566	3.84208	3.67356	3.35058	3.82329	4.01146	3.72537	3.74286	3.40367	3.25707	3.38605	3.4186	3.23685	3.79372	3.41601	3.32061	3.30774	3.3505	3.41601	3.00701	3.46421
ERCCmix1step7	4.6011	4.15052	4.37673	3.92745	4.50931	4.40026	4.02589	3.83779	4.3228	4.19682	4.24526	4.11755	3.95559	3.51706	3.89105	4.3674	4.36157	3.7006	4.46638	4.26553	4.08625	4.17267	4.62104	4.04483	3.85473	4.29943	4.23092	4.07533	4.6647	3.75439	3.50921	3.4525	3.64758	3.22631	3.63892	3.46285	3.63405	3.62586	3.62985	3.31218	3.51437	3.41306	3.43689	3.47373	3.39596	3.06262	3.55513	3.41129	3.28756
ERCCmix1step8	5.33223	4.63573	4.9454	4.59024	5.13029	4.60696	4.30681	4.04385	4.99359	4.89918	4.35158	4.64896	4.73672	4.02689	4.13561	4.47469	4.77274	4.14932	5.22943	5.04346	4.57579	4.60467	5.14741	4.21243	4.46227	5.40949	5.14807	4.27081	4.90976	4.48674	5.27048	4.22158	4.70435	3.8464	4.50369	4.13761	3.95074	4.28386	4.41933	4.10886	3.92932	4.18765	4.37382	3.9766	3.53483	3.72424	4.30254	4.12988	4.84137
ERCCmix1step9	4.9991	4.38597	4.66996	4.70236	4.64106	5.03635	4.04592	4.4366	4.94498	4.36038	4.45038	4.81328	4.4288	3.99937	4.27719	4.62572	4.51546	4.16521	5.03194	4.57293	4.8866	4.57117	5.01601	4.47989	4.40024	4.46694	4.71221	4.77863	5.14116	4.76404	4.69706	4.16173	4.37973	4.0406	3.90937	4.06174	4.64066	4.2757	4.12638	4.00791	4.06428	4.34838	4.24719	3.87381	3.74184	3.78083	4.31957	4.33252	4.42784
ERCCmix2step1	7.90292	7.69115	7.50573	7.73352	7.14018	7.66083	7.26316	7.09536	8.56416	7.66507	7.00003	7.56738	8.52065	7.05133	6.54599	7.47292	7.73965	7.23114	8.46463	8.68773	8.08989	7.81954	8.70377	7.43301	7.07852	9.38028	7.33544	8.03876	7.89501	7.23503	7.3219	7.159	6.72273	6.90924	6.96439	6.9417	6.90056	6.51875	6.80371	7.05787	6.57172	6.99532	6.70287	6.67253	6.66881	6.01605	7.50468	6.68882	7.99112
ERCCmix2step10	6.91117	6.36724	6.87261	6.21436	6.23191	5.83487	5.83848	5.76805	6.79924	5.8365	5.56242	6.06718	6.5424	4.74084	5.59056	5.8501	7.11627	5.14555	7.71072	8.54826	6.76602	6.52535	7.21059	5.75226	6.6411	6.51586	5.80787	6.3512	7.25868	6.17813	6.5397	6.20034	7.45537	5.5344	6.25911	5.39188	6.34608	5.1666	6.45141	5.72032	5.30682	4.85086	5.45988	5.1274	5.09775	5.14691	5.52626	5.90465	6.47132
ERCCmix2step11	4.00838	3.81744	3.569	3.51628	3.63234	3.50749	3.70386	3.30323	3.83906	3.70946	3.47079	3.49768	3.79324	3.10978	3.16984	3.87456	3.57196	3.32533	4.78736	4.30551	3.78945	3.51835	3.73431	3.41885	3.83906	3.65319	3.53745	4.04968	4.12206	3.66552	3.7294	3.22388	3.98472	3.11524	3.24741	3.00282	3.3781	3.12685	3.44108	3.3434	2.86527	3.03469	3.46022	2.87001	2.96586	2.97601	3.44974	3.33716	3.48363
ERCCmix2step12	5.2781	4.45232	4.70325	4.35742	4.9686	5.0775	4.38611	4.17767	5.84126	4.73379	4.39257	4.3582	4.76933	3.93152	3.81267	4.58004	5.42397	4.62089	5.4245	5.74209	4.95619	4.72017	5.54452	4.41713	4.48844	4.86938	4.62405	4.76021	5.54478	4.48499	4.63706	4.15199	5.29307	4.44127	4.47045	4.05731	5.21116	3.9932	4.55356	4.76566	4.05945	4.52554	4.21717	3.78299	4.14449	3.93433	4.40768	3.94605	5.06162
ERCCmix2step13	5.71086	4.90481	4.93377	5.25413	4.22579	5.22177	4.49705	3.71614	5.08439	4.23238	4.22821	3.99537	3.97723	3.75958	3.86617	4.44064	4.33308	3.84029	4.9064	6.36467	4.5882	4.47701	4.78892	4.30605	3.79552	5.67279	3.97992	4.52205	4.52395	4.021	4.41999	3.72885	5.07449	4.2679	3.99244	4.16864	3.55592	3.57571	3.75184	3.72643	4.05314	4.24643	4.41761	4.0548	3.75708	4.0259	4.14928	3.82244	4.16517
ERCCmix2step14	4.73791	3.84081	4.71418	3.80929	4.88872	4.82001	3.87068	3.99593	4.2838	3.81513	4.4575	4.47638	3.62668	3.56551	4.03023	4.33303	4.00479	3.73057	4.5226	3.68258	4.24951	3.94663	4.16723	4.27904	4.12687	4.25081	4.32851	4.22066	4.65121	3.85677	3.35451	3.804	3.91971	3.6542	3.74697	3.50793	3.62226	3.61989	3.77669	3.52776	3.63342	3.32344	3.41081	3.45288	3.54747	3.20892	3.44123	3.43882	3.26117
ERCCmix2step15	5.63432	4.78	5.25185	4.05719	5.33039	5.2611	4.38806	4.28407	5.04504	4.44799	4.86761	4.96634	4.23871	3.97204	4.498	4.95008	4.49651	4.27215	5.29162	4.51681	5.19037	4.58555	5.05082	4.76991	4.8442	5.04801	5.11239	4.69917	5.20423	4.54834	3.58494	4.15423	4.24723	4.10205	3.98396	4.24667	3.98442	4.27743	4.09953	3.63312	4.13821	3.8006	3.75334	3.92914	4.06722	3.80585	3.90925	3.718	3.81632
ERCCmix2step16	5.34057	4.8554	4.98734	4.57598	4.96568	5.17144	4.19802	4.23808	4.68805	4.24915	4.85091	4.85176	4.26046	3.93842	4.70935	5.38884	4.53182	4.27983	5.32677	4.22858	5.21092	4.61514	5.07418	4.81928	4.62795	4.88192	4.97503	4.52525	5.5268	4.59188	3.84099	3.97386	4.56076	4.05959	4.02417	4.09802	4.13425	4.19105	4.04549	4.08762	4.20485	3.82585	3.95541	3.95541	3.90998	3.92299	3.90932	4.12063	3.60847
ERCCmix2step17	5.20668	4.45628	5.1324	4.56985	5.08072	5.18352	4.35194	4.5542	4.54765	4.23697	4.7954	4.74371	3.90266	4.10097	4.48716	4.71877	4.45644	4.28548	5.21101	4.01629	4.99055	4.62148	4.65985	4.85696	4.58882	4.86587	4.67804	4.79374	5.12435	4.4283	4.23839	4.32998	4.53759	4.39023	4.06246	4.45033	4.30525	4.404	4.4252	4.14191	4.29838	3.79013	3.97741	4.11297	3.82925	3.56676	3.8709	4.23012	3.67449
ERCCmix2step18	5.71179	5.07955	5.48711	4.98708	5.57154	5.94207	5.07158	4.8193	5.17013	4.85311	5.25874	5.43339	4.65906	4.39587	4.93083	5.31878	4.84395	4.75365	5.9902	4.78489	5.71999	5.01892	5.44704	5.43573	5.27518	5.56701	5.35815	5.04579	5.79982	4.89648	4.49472	4.57395	4.95557	4.65935	4.61974	4.69661	4.71139	4.7796	4.81088	4.63872	4.66375	4.1415	4.44396	4.50738	4.19511	4.08357	4.49472	4.56629	4.2604
ERCCmix2step19	5.23734	4.41191	4.62867	4.12216	4.99246	5.09313	4.21226	4.23918	4.16271	3.93353	4.66026	4.52426	3.69195	3.72885	4.31838	4.60041	4.27381	4.13522	4.82777	3.98315	4.73578	4.27068	4.39195	4.61733	4.25498	4.51525	4.42175	4.04204	4.93847	4.20568	3.80919	3.92035	4.2239	4.00243	3.79674	4.03435	3.6954	4.03119	4.03928	3.72418	4.23562	3.71343	3.79276	3.87381	3.67394	3.432	3.8122	4.16588	3.58337
ERCCmix2step2	7.39594	6.35336	6.05576	6.34341	6.50067	6.61701	6.60532	6.03632	7.09423	6.19914	5.87008	5.63648	6.68953	5.65197	5.32565	6.34502	6.91993	5.99448	7.77485	7.31102	6.46655	6.62159	7.098	6.32077	6.01812	7.46809	6.16573	6.64046	7.17678	6.19482	6.22304	5.6555	5.82029	5.44997	6.09327	5.39647	5.69206	5.65019	5.71993	5.52	5.5299	5.49046	5.20767	5.11766	5.38255	5.50075	5.62533	5.49519	6.17968
ERCCmix2step20	6.22204	5.48469	5.64886	5.38735	5.83056	6.05058	5.2965	4.75173	5.12033	4.92682	5.7368	5.64133	4.81884	4.78197	5.23727	5.6681	5.20693	5.11379	6.54646	5.0555	5.90066	5.31522	5.36268	5.6245	5.48819	5.59484	5.61597	5.3328	5.80278	5.22215	4.20574	4.60511	4.56706	4.53096	4.67485	4.52621	4.50727	4.5444	4.55332	4.25186	4.48074	4.10442	4.1503	4.47259	4.47068	4.18775	4.20523	4.55693	4.09035
ERCCmix2step21	4.69455	4.24306	4.84633	3.97875	4.6191	4.48474	3.89996	3.99373	4.14859	3.93536	4.43932	4.48169	3.73302	3.677	4.18578	4.38103	4.3239	3.85353	4.94372	3.56126	4.44642	4.20846	4.24877	4.60545	4.13255	4.22303	4.32983	4.14386	4.76299	4.06113	3.20639	3.87858	3.73977	3.8732	3.65883	3.73913	3.6448	3.93146	3.79408	3.55706	3.79545	3.35817	3.44894	3.43771	3.69018	3.26124	3.4571	3.81182	3.47079
ERCCmix2step22	4.74935	4.11225	4.61406	3.61058	4.3165	4.17095	3.74685	3.72461	3.93439	3.65807	4.19444	4.16329	3.59894	3.29729	4.03463	4.34503	3.94235	3.64121	5.13434	3.53438	4.46195	4.00891	4.19791	4.1016	4.02116	4.04478	4.17442	3.91781	4.53489	3.87661	3.3254	3.53541	3.78175	3.53644	3.67205	3.50135	3.34966	3.56921	3.57146	3.36176	3.70731	3.21446	3.25408	3.34645	3.15138	2.96319	3.26895	3.33652	3.4644
ERCCmix2step23	11.2601	9.48001	9.72909	9.01821	10.3865	9.78431	8.78774	7.51329	10.1647	7.5397	9.38911	9.52512	8.60162	7.65624	7.61174	10.3523	9.72383	9.24145	11.4821	9.70283	10.2075	9.25781	10.4178	9.2008	9.33695	11.0804	9.86138	10.0226	10.7498	9.36696	7.54954	4.79531	7.1979	5.08618	5.33867	5.50314	5.70028	4.61724	5.18514	4.81058	4.5178	5.80071	5.67106	5.1861	5.99817	4.02022	7.70654	4.78082	7.85875
ERCCmix2step24	4.39136	3.94853	4.37604	3.76085	4.16566	4.09346	3.43129	3.69837	3.75539	3.61831	4.09626	4.02031	3.54789	3.3383	3.85568	4.16446	3.59537	3.54744	4.62731	3.55556	4.30688	3.80548	3.8711	4.12331	3.88079	3.99898	3.95061	3.80234	4.34198	3.74317	3.38314	3.62455	3.82651	3.61575	3.65737	3.44116	3.55747	3.4942	3.77943	3.53992	3.67994	3.18806	3.32253	3.31155	3.48101	3.29447	3.39379	3.45661	3.28912
ERCCmix2step25	5.02058	4.47108	4.98265	4.03044	5.02406	5.04811	4.44332	4.304	4.38241	4.01622	4.97698	4.77103	3.82901	3.69656	4.33598	4.79373	4.36197	4.1651	5.5501	4.2378	5.10576	4.47199	4.62981	4.77462	4.62273	5.00282	4.68118	4.54747	5.15577	4.36105	3.71241	4.15384	4.20362	3.93836	3.90094	3.77755	3.75267	3.67273	3.88366	3.51941	3.89816	3.76805	3.67862	3.94315	3.82725	3.54227	3.70767	3.72772	3.92426
ERCCmix2step26	5.73516	5.10687	5.67758	4.99077	5.53515	5.7239	4.76257	4.82606	5.4362	4.74643	5.34572	5.34027	4.62037	4.42491	4.86486	5.50468	5.0328	4.68221	5.75232	4.69081	5.65628	5.1239	5.48296	5.26834	5.11715	5.60151	5.37822	5.30104	5.85946	4.82947	4.00063	4.81127	4.9467	4.73097	4.51867	4.53017	4.65174	4.73587	4.75838	4.35364	4.42288	3.99061	4.38558	4.34523	4.09219	3.88187	4.3774	4.45755	4.39468
ERCCmix2step27	4.70997	3.9149	4.51541	3.80991	4.24753	4.56676	3.51564	3.7564	3.85075	3.80695	4.40747	4.16244	3.49525	3.5609	4.24424	4.2817	3.88698	3.69343	4.42017	3.53458	4.35752	3.98546	4.09511	3.97365	3.88582	4.08514	4.38607	3.84377	4.69464	3.70507	3.50661	3.56431	3.87587	3.78486	3.58953	3.68908	3.82055	3.70736	3.67652	3.52826	3.88835	3.64309	3.49322	3.44676	3.41614	3.37921	3.4085	3.45651	3.38286
ERCCmix2step28	5.49901	4.70801	5.46888	4.48715	5.44584	5.39939	4.64809	4.49478	4.80235	4.3247	5.09871	4.95286	4.3225	4.16458	4.51907	5.21339	5.00064	4.5298	5.36077	4.40452	4.89925	4.63148	4.96226	4.95405	4.6082	4.9968	4.94787	5.14605	5.4915	4.59175	3.69146	4.17391	4.32469	4.63331	4.11493	4.17517	4.11161	4.03541	4.3106	4.02722	4.10651	3.72389	3.80069	3.9615	3.72711	3.54295	3.97715	3.97715	3.56901
ERCCmix2step29	5.53429	4.36649	5.01164	4.59034	5.0447	5.15185	4.20599	4.28874	4.55509	4.32648	5.03691	4.60281	4.00881	3.85994	4.34999	4.70846	4.05939	4.21149	5.10894	4.00808	4.79343	4.55677	4.70621	4.59526	4.44891	4.96919	4.79385	4.47446	5.26042	4.27499	3.57699	4.22665	4.28043	4.35711	4.12113	4.01961	4.03122	4.04147	4.02449	4.07658	4.07305	3.76373	3.75225	3.92438	3.76293	3.57684	3.77011	3.64905	3.59926
ERCCmix2step3	4.44802	3.91159	3.9044	4.56799	4.25943	4.37373	4.15802	3.96264	4.62031	3.59408	3.83384	3.59941	4.42419	3.74037	3.81159	3.83953	4.00085	4.04352	4.59017	4.18532	3.87826	3.93187	4.66428	3.87164	4.01278	4.46969	4.04594	4.07738	4.22569	4.03785	3.90838	4.30832	4.39648	3.60729	4.46201	4.03756	4.24733	4.03178	4.12457	4.10968	3.98369	4.03163	3.59733	3.68471	3.65547	3.46612	3.7143	3.3815	4.1598
ERCCmix2step30	4.47775	3.73592	4.21568	3.4476	4.07211	3.88399	3.63164	3.38686	3.55873	3.32953	4.20214	3.92991	3.22812	3.12295	3.74647	3.80821	3.45034	3.39617	4.15335	3.29445	4.0619	3.67412	3.57295	3.9223	3.66439	3.50594	3.89874	3.43976	4.23022	3.3789	3.16722	3.6816	3.66044	3.53216	3.30998	3.19773	3.20739	3.61727	3.39726	3.31563	3.51613	3.22055	3.05216	3.2304	3.19106	3.25072	3.12225	3.08694	3.22005
ERCCmix2step31	5.09487	4.3009	4.71108	3.9774	4.68298	4.83919	3.95259	3.84153	4.1189	3.73319	4.45183	4.52958	3.64337	3.44761	4.03598	4.66686	4.07265	3.90241	5.34251	3.84142	4.68083	4.11365	4.38269	4.37017	4.26519	4.44328	4.57303	4.12599	4.60107	4.11355	3.75254	4.19113	4.28864	3.97176	3.96112	4.00145	3.97441	4.064	4.13876	3.97266	4.06607	3.9946	3.69637	4.00481	4.02638	3.83443	4.0414	3.74262	4.01948
ERCCmix2step32	4.18234	3.89039	4.50709	3.58496	4.34313	4.51268	3.6146	3.75684	3.60728	3.44826	4.48825	4.17521	3.18698	3.39865	3.80551	4.38795	3.76388	3.51833	4.75478	3.50996	4.33016	3.73739	3.98044	4.20768	3.8486	3.89349	4.01517	3.62962	4.4295	3.74613	3.33963	3.59384	3.86525	3.51978	3.37803	3.37686	3.45465	3.55115	3.70449	3.31895	3.60063	3.3975	3.4041	3.41039	3.45996	3.47488	3.38835	3.3526	3.23909
ERCCmix2step33	4.34178	3.85131	4.3858	3.41586	4.3	4.02162	3.46098	3.68169	3.65413	3.34154	4.09649	3.94074	3.28788	3.40289	3.77798	3.96878	3.75836	3.47186	4.36805	3.419	4.12165	3.80572	3.58513	4.01228	3.64604	3.74858	3.91884	3.45344	4.66387	3.64872	3.25689	3.69887	3.77692	3.50969	3.50295	3.44736	3.31817	3.5444	3.50359	3.26544	3.59876	3.2202	3.08591	3.53089	3.14035	3.05711	3.25689	3.30513	3.09219
ERCCmix2step34	5.23559	4.16513	4.52145	4.6376	4.06766	4.82904	4.32594	4.16728	4.18659	4.77416	4.17599	4.22957	3.83328	3.41487	4.00296	4.29967	4.01648	3.78937	4.53907	4.32453	4.80395	4.07174	5.18556	3.92362	3.90933	4.5403	4.73747	4.05396	4.66806	3.80716	3.61456	3.40693	4.38571	3.78032	4.1901	3.31987	3.6924	3.75153	3.60282	3.495	3.6497	3.25039	3.74914	3.54004	3.55051	3.12469	4.09367	3.6933	3.80663
ERCCmix2step35	18.1986	15.3818	16.3435	15.108	16.8221	16.2788	13.9268	11.1619	17.5664	12.1686	15.9962	15.8894	15.8919	12.3606	12.5078	16.865	16.1656	16.494	17.5898	17.6718	16.6983	15.8183	18.1086	16.1174	15.3023	18.5503	17.0577	17.6093	17.1959	16.7067	13.3818	7.99194	12.4504	8.30685	9.69395	9.01327	10.1666	7.78898	8.28808	8.18104	8.25164	10.9709	9.63831	7.72679	11.7542	7.68487	13.0707	8.45054	15.9625
ERCCmix2step36	6.02144	5.4003	5.23816	5.21651	5.28008	5.48633	4.75231	4.50683	5.5104	4.99538	4.56366	5.30765	5.51591	4.23214	5.04731	5.01076	5.43901	4.28513	6.49706	5.81636	5.05992	5.26294	5.76301	5.33258	4.69127	5.72021	5.28644	5.14364	5.87055	5.0035	4.83263	4.70353	4.61954	4.12366	4.59944	4.45096	4.58709	4.32754	4.34541	4.48227	4.53396	4.58639	4.07847	3.88701	4.41223	4.20576	4.35248	3.9321	5.40582
ERCCmix2step38	5.48189	4.91985	5.4991	4.70858	5.41762	5.48694	4.80355	4.73976	5.15458	4.61487	4.94444	5.47162	4.65289	4.66278	4.92398	5.3575	5.57678	4.67338	5.71194	5.21696	5.60125	5.05076	5.3529	5.2021	4.84551	5.41265	5.0753	4.98962	5.96338	4.95107	4.34946	4.76355	4.85893	4.27863	4.52756	4.23797	4.41946	4.5103	4.28388	4.39166	4.52163	4.10405	4.11178	4.24411	4.31672	4.13425	4.4527	4.27242	4.34911
ERCCmix2step39	5.74139	5.38437	5.5086	5.24884	5.86892	5.5415	5.55334	5.35187	5.61078	5.16152	5.18281	5.39456	5.1721	4.68103	4.81052	5.28589	5.30394	5.21501	5.77639	5.2317	5.39252	5.35211	5.40304	4.9378	5.45784	5.67004	5.11347	5.3698	5.54888	5.36315	4.74585	4.82869	5.08226	4.73541	4.80066	4.53471	4.84648	4.889	5.2713	4.61123	4.52212	4.03497	4.54256	4.58092	3.88699	3.99776	4.86512	4.62436	4.09784
ERCCmix2step4	5.73551	4.96456	5.22585	4.76735	4.76732	4.83566	4.67172	4.39004	5.35822	4.90628	4.63642	4.9173	4.90778	4.37553	4.3461	5.40162	4.73273	4.70035	5.28439	5.59811	5.26276	4.88666	5.23676	4.94331	4.82474	5.75779	4.79118	5.07993	5.12925	4.8069	4.45904	4.21954	4.63637	4.53204	4.33321	4.38757	4.5415	4.27865	4.03625	3.9379	3.73559	4.08524	4.40238	4.13213	4.3388	3.8487	4.89603	4.42749	4.55921
ERCCmix2step40	9.28583	8.325	8.99397	8.78677	8.53956	9.17332	8.63335	8.12342	9.09933	8.72758	8.5795	8.9394	9.2873	7.98242	7.38842	9.00299	10.1338	8.91931	10.4411	10.2959	9.34801	8.64543	10.4649	8.15571	8.64679	10.0247	8.88851	9.13123	9.61753	8.78083	7.9388	7.78175	8.87689	7.62899	7.77047	7.60734	8.13846	7.50334	7.67894	7.64334	6.88693	7.02671	7.54103	7.32365	6.5755	6.70306	8.05554	7.517	8.7952
ERCCmix2step42	4.22434	4.13106	4.3292	4.078	4.19882	4.08995	3.93419	4.01365	4.2762	3.69596	4.11405	4.07469	4.11766	3.95359	3.59303	3.84284	4.14609	3.87124	4.24467	4.11291	4.21237	4.27112	4.06028	3.86176	4.03071	4.36726	4.12621	4.28118	4.2767	3.91777	3.88866	3.63335	3.83726	3.35181	3.64793	3.20242	3.7337	3.37234	3.64248	3.494	3.29172	3.32398	3.66694	3.57613	3.67835	3.43274	3.85278	3.69241	3.88934
ERCCmix2step43	6.61113	5.24032	5.2891	5.48353	4.94703	5.42675	4.89852	4.65772	5.6211	4.85239	4.90559	5.15875	5.52173	4.49708	4.17776	5.1976	5.52492	4.91804	6.11291	6.66991	5.68428	5.32455	6.02913	4.62359	5.14844	6.6321	5.48476	5.82186	6.1284	5.0642	4.97888	5.39041	5.47496	4.87339	4.66283	4.44958	5.51608	4.78449	4.81306	4.54021	4.15077	4.47309	5.03986	4.72742	4.12752	4.21201	5.02225	4.45174	6.00514
ERCCmix2step44	5.9864	5.46313	5.76868	5.83064	5.95979	5.74769	5.57929	5.27764	5.88293	6.01833	5.37783	5.75672	5.99318	5.3924	5.75343	5.37715	5.70145	5.73735	6.0195	6.22988	5.73736	5.75274	6.04094	5.62238	5.6601	6.07446	5.40671	5.60141	6.05728	5.86637	5.17793	5.30057	5.68306	5.24985	5.66856	5.59753	5.81363	5.21265	5.46343	5.56819	4.47585	4.6974	4.79137	4.80746	4.74374	4.58119	5.04543	5.05874	5.16386
ERCCmix2step6	5.14457	4.40147	4.76496	4.52428	4.64095	4.95943	4.50785	4.19124	5.40522	4.69129	4.39787	4.23923	4.28837	4.05478	3.9842	4.62191	4.55552	4.10241	4.90821	5.19325	4.47676	4.56164	5.04322	4.42429	4.30609	5.26602	4.56785	4.91483	4.79931	4.41723	4.16397	3.95465	3.76294	3.91186	4.52851	3.88647	3.91606	4.04978	3.66332	3.80052	3.75963	4.01368	4.09461	4.07736	4.48772	4.11439	4.09461	4.3231	4.49628
ERCCmix2step7	5.00434	4.68146	5.0696	4.46062	4.4397	4.41	4.61017	4.18031	5.06552	4.62755	4.59085	4.50253	4.76274	4.12812	4.46462	4.65418	4.48899	4.54044	4.99531	4.81064	4.88962	4.41536	4.74884	4.67725	4.49711	5.27543	4.62071	4.55222	4.9509	4.45174	4.20108	3.75845	4.20058	3.98686	4.07329	3.61178	4.46825	3.78065	3.74823	3.99698	3.76768	4.00386	3.92181	3.55491	3.69104	3.93728	4.00492	3.78819	4.44312
ERCCmix2step8	6.90561	6.26391	6.28137	6.46505	6.66125	6.26683	6.3943	5.97234	7.10466	6.02344	6.04579	5.95943	6.76472	5.27671	5.85583	6.08026	6.28309	5.72399	7.18723	7.84646	6.60887	6.05	7.05791	5.97416	6.09834	7.22647	5.76893	6.14412	6.88139	5.88962	5.36935	5.61957	6.12556	5.24538	5.82995	5.33904	6.07885	5.34755	5.27087	5.22804	4.95329	4.97935	5.01239	4.97939	5.01035	4.91165	5.27192	5.72923	6.28991
ERCCmix2step9	5.7106	5.11784	5.27819	4.87812	5.20948	5.00683	5.01074	4.59024	5.38907	4.95093	4.39452	5.178	4.75869	4.50944	4.77923	4.94635	5.0302	4.59591	5.9083	5.62004	5.25019	4.80376	5.69156	4.76831	5.24678	5.45559	5.16028	5.11469	5.3375	5.10766	4.78568	4.13182	4.47109	4.32946	4.66388	3.95852	4.47957	4.28029	4.54027	4.30429	4.61175	4.57979	4.69512	4.28213	4.50666	4.1628	4.74948	4.78501	4.95699
HTA2-neg-47419064_st	4.46091	3.88674	5.06159	3.39876	4.29795	3.84449	3.56805	3.40639	2.72578	3.91503	3.6368	2.69083	2.27974	3.37448	3.35902	2.28984	4.56779	3.39907	4.93497	3.41376	3.78258	3.42785	5.21572	4.51096	2.28639	3.2528	4.80907	3.52419	4.42053	3.59792	3.52838	4.25418	2.8513	3.91283	5.39201	2.63692	3.03398	3.68221	3.78478	3.09823	3.46255	3.06864	5.28557	3.70295	3.40673	3.40689	4.56461	3.85042	4.18005
HTA2-neg-47419066_st	4.87492	2.96566	4.80145	4.61091	3.9184	5.85753	4.12754	4.89618	2.92103	4.29979	5.07059	3.99671	3.92444	3.40438	4.82661	4.01658	4.8014	4.25823	3.89545	3.14149	5.53786	4.62026	5.14932	3.57884	7.06532	5.13488	3.31969	3.65723	4.62352	3.16848	5.52214	3.84384	6.48952	4.10926	3.64751	4.28038	5.96114	5.61482	3.07962	3.64881	3.54338	3.57424	4.98047	4.03808	3.44029	2.83461	4.74872	3.37532	4.2683
HTA2-neg-47419077_st	6.90373	5.1062	6.05531	5.1433	3.50895	4.70088	3.34232	3.92945	9.70644	8.36233	3.79537	6.39918	9.5784	2.68159	6.74987	6.04782	4.89785	4.96792	7.86024	9.71192	4.71074	7.26471	8.65199	4.49136	7.82518	4.49243	4.34597	4.97218	6.24592	4.85441	4.00378	5.51432	7.5307	5.00987	7.46318	3.64725	3.55552	5.51073	7.57893	4.44274	3.98569	4.67555	7.0163	6.93097	8.68113	7.4252	8.23703	4.53835	6.37449
HTA2-neg-47419080_st	5.22686	6.94926	3.62346	10.5038	4.76043	2.18754	3.58402	7.45577	2.18335	8.05971	2.06346	2.23396	4.54281	4.7761	2.23857	2.27236	2.52969	5.31588	4.57757	2.17754	3.44098	2.55581	2.5994	2.43365	4.13108	4.33475	4.94608	3.25042	3.68415	5.89903	2.85983	2.80873	4.38525	5.27479	3.95385	5.78657	8.25222	7.31355	6.92139	3.60813	3.8739	6.01952	5.16684	2.61851	7.89863	6.0335	11.72	6.59188	2.61411
HTA2-neg-47419083_st	5.52006	5.58955	3.65009	4.96061	3.4527	6.33933	4.47647	2.80143	8.69924	4.61104	3.4171	5.97075	4.71972	3.51449	4.43722	3.57932	3.42943	4.11466	3.54638	3.58376	4.77793	3.77894	4.63272	4.21231	3.75185	4.21664	3.08749	3.98429	4.89004	7.73914	7.38168	5.00863	6.78802	5.8865	7.45612	6.69595	3.49069	7.84579	6.26312	4.06594	5.36368	5.33997	4.72805	3.79725	4.46946	9.06221	7.5281	6.24342	3.61594
HTA2-neg-47419101_st	7.67002	6.32231	8.30319	3.49708	5.05413	6.05122	3.53485	5.88724	4.551	4.72171	6.23702	4.31143	5.85574	4.12459	3.89113	4.24405	4.17354	7.50379	4.94624	8.64635	5.0449	5.01793	5.89261	2.80262	5.96997	5.35132	4.09297	5.57683	5.18123	3.84651	4.28728	3.06856	6.04326	6.46314	5.90229	6.748	3.06856	4.65662	4.4186	5.4374	4.85153	5.93642	4.97052	4.07106	6.30401	2.89208	4.51704	3.30288	8.05222
HTA2-neg-47419113_st	5.22923	6.14144	5.4392	5.37495	4.41326	5.84564	3.65661	5.73915	2.88857	3.65519	3.96601	4.20062	5.16606	3.5669	4.34938	4.2315	4.89757	5.5826	3.14747	4.68122	3.7858	6.04216	5.05908	4.17929	4.99487	6.13038	4.65168	6.06379	3.20239	5.63752	4.28668	3.99529	4.64478	4.32032	6.20834	5.55612	3.88155	4.92844	5.00679	5.3144	5.95298	3.64513	4.34624	5.08451	5.55572	6.02276	7.08057	4.01691	3.26253
HTA2-neg-47419116_st	3.68835	3.04094	2.85956	3.194	3.12324	4.24724	4.05653	3.61014	3.88459	3.06437	4.50893	2.7167	4.03527	2.93498	2.9963	3.32797	3.06433	3.40869	3.40551	3.26247	3.09855	5.15736	4.09739	3.72522	4.01071	2.91105	3.17599	3.30408	5.18755	3.19827	4.40824	3.23209	4.12356	3.38092	3.09529	3.71525	3.41	2.98624	3.85574	3.82714	4.07538	2.84178	3.51295	2.72183	2.95705	3.81764	3.43891	2.74277	3.25758
HTA2-neg-47419185_st	7.56353	4.70112	6.29318	5.85662	5.21255	4.03971	6.42972	7.24109	5.41742	7.05071	6.73745	4.73505	6.17809	8.10135	2.44571	8.04738	5.00824	6.57803	5.31871	6.38748	8.89224	6.62123	7.51363	6.58051	5.073	5.65862	7.34118	8.93568	5.20888	7.12879	8.21251	5.65401	5.0797	5.30341	4.31844	3.39861	5.51953	5.69047	5.40322	7.20268	3.56478	4.18716	5.41645	3.60205	4.20673	2.69466	7.53214	9.05165	5.24293
HTA2-neg-47419191_st	3.97087	3.25471	3.90477	3.14641	3.92231	3.2433	3.59032	3.63213	5.36144	3.06225	2.97236	3.99754	4.19211	3.02578	3.6855	3.74258	3.75649	3.2309	3.41997	4.34773	3.39139	2.8987	3.61536	2.22516	3.26001	3.37101	3.136	3.2267	4.56102	3.3146	4.35522	3.61511	4.08323	3.87977	4.15771	3.9161	3.75406	4.31048	4.29059	4.66524	3.96167	4.04686	2.93077	3.64955	3.77537	3.34788	3.12092	2.8734	3.91215
HTA2-neg-47419192_st	5.35477	3.75041	3.95088	4.39543	4.98715	3.52085	4.19064	3.89243	5.28951	4.78176	3.78464	4.49001	3.461	3.31535	3.77762	4.51751	5.04402	3.63586	4.2385	3.45239	4.97604	5.29327	4.40695	4.65743	4.30767	4.54423	4.81787	5.72029	5.75488	3.7839	3.68948	3.55898	4.65175	4.05785	3.24582	3.16214	3.8559	5.18033	3.59964	3.69531	4.54105	4.43261	3.28685	3.57656	3.29248	4.1114	3.48971	3.26695	3.22193
HTA2-neg-47419193_st	2.62119	3.02258	2.56238	4.37944	4.05	4.93547	2.68704	3.68234	3.68756	4.69334	3.2021	3.27846	5.3263	2.77606	3.12878	3.68133	3.71439	3.09476	4.86599	3.67871	3.76552	3.0257	5.88868	4.47955	4.50325	4.36029	4.60186	3.75595	2.68394	2.51541	3.57779	4.7388	5.56178	3.90409	5.02475	4.98053	4.75509	4.60974	3.04063	4.46754	2.96188	4.58937	4.6232	4.06445	3.44105	4.82016	3.38741	4.66741	4.69906
HTA2-neg-47419195_st	3.41702	4.77403	6.43494	7.79189	4.99794	4.70267	5.85474	7.81837	4.551	3.17562	7.20043	6.86733	3.21291	3.58852	6.53868	3.93936	7.38035	4.17586	6.14403	2.2846	8.18832	4.1472	6.66908	4.18867	2.90479	3.68434	5.25399	4.60568	3.54171	5.3479	7.57795	2.75084	3.18215	4.74338	2.5805	7.47411	2.60313	5.47628	4.89066	5.73028	6.04554	8.45702	6.36546	3.40146	2.7063	5.36513	5.53617	5.18932	7.01168
HTA2-neg-47419203_st	8.45138	3.35432	7.21564	5.64833	11.1688	7.43508	6.66908	6.67636	6.57803	5.50702	5.4464	6.79031	4.29795	5.8894	6.97042	4.96811	10.5666	8.78184	10.5435	6.38748	4.5324	7.57652	2.25924	6.44623	4.82872	12.7373	4.35161	8.19027	8.65905	6.94563	10.1146	8.46677	9.80437	5.88921	7.79436	6.36401	5.094	6.7066	6.75333	7.02976	5.65129	9.24227	5.16684	7.37229	6.54472	5.97114	7.44677	5.02415	8.36577
HTA2-neg-47419205_st	5.22643	3.23132	2.93931	4.12183	4.37267	3.32629	3.61907	4.15773	5.64318	3.53816	3.53179	2.78039	2.51016	3.62978	4.36138	3.00283	3.46734	5.17714	5.0347	3.0482	3.67619	3.65057	4.45427	3.01257	4.64442	2.85394	4.56889	3.70657	5.30386	3.84321	3.01827	5.13657	4.32179	2.5805	4.52947	3.56485	3.61449	2.76371	3.61345	2.994	2.1525	5.00031	4.74418	3.54502	3.32051	4.11337	3.37944	4.17902	2.62662
HTA2-neg-47419210_st	2.05795	3.11924	2.35915	3.58628	3.82105	2.6311	2.51972	2.16854	2.88551	2.4801	3.2129	2.30062	3.09917	2.4801	2.51935	2.74336	4.58338	2.35151	2.85638	3.24178	2.24118	3.41702	2.89709	2.43365	2.43616	2.1222	2.78196	3.03901	3.41702	4.29795	5.29986	2.26762	4.19312	2.41086	2.37461	2.27108	3.06856	2.15386	2.79673	2.3692	2.69993	3.05103	2.55005	2.41295	2.74455	2.26907	2.38588	2.03162	2.28148
HTA2-neg-47419220_st	2.91905	3.57064	9.3385	3.2555	4.30706	5.63294	2.13506	6.25979	4.0616	3.42982	3.68902	4.86803	6.3294	4.28953	4.81721	5.01844	4.0225	4.60107	4.42918	4.54808	6.22335	3.5809	3.57222	3.83581	7.64805	5.70722	4.19659	3.37885	5.93559	4.2488	2.62712	3.96082	7.43666	6.68126	2.85789	6.8931	2.99759	2.66605	6.91029	3.82041	4.16889	5.81258	4.99157	2.25423	2.46346	2.77557	4.63771	4.13912	4.66028
HTA2-neg-47419221_st	4.90225	4.51326	4.07383	6.01469	3.86316	3.75133	3.77611	2.95446	3.55812	2.74826	3.48302	3.9145	3.99924	3.47274	4.06505	4.09035	4.92757	3.07173	6.22841	2.47507	5.53472	3.83237	3.44947	4.45715	4.31883	4.88646	3.50944	4.5285	4.99042	4.29774	4.73729	4.23229	4.3299	4.39197	5.95251	5.57636	4.78196	4.12665	4.3862	3.14445	3.55426	3.7024	4.56676	4.2849	4.07978	2.37469	4.44761	5.63727	3.76424
HTA2-neg-47419231_st	8.35257	8.55088	4.12798	9.04419	9.95889	10.4055	6.95012	8.36156	13.1309	9.698	6.61336	9.681	11.4454	9.5174	9.23971	10.6251	8.94526	8.94538	12.9257	9.29618	9.20919	10.0257	11.412	8.72119	6.57087	11.7871	10.4683	9.2184	10.7166	9.02341	6.9336	7.19986	10.1265	8.01204	10.1497	5.55071	10.8643	10.1144	9.06904	9.90677	8.72511	4.73109	6.2024	6.00514	8.19478	5.87106	7.79474	7.21552	9.43492
HTA2-neg-47419258_st	3.76683	3.19987	3.48113	3.79547	5.53233	4.61516	4.48345	4.91624	4.47138	3.04072	3.88379	4.92596	3.24708	2.51935	3.69705	3.54935	5.21961	2.62254	3.66759	2.78887	2.07225	3.17562	5.14566	4.38289	6.36446	4.12459	4.56537	3.51333	4.52069	4.61755	4.60025	4.38525	4.13385	5.91743	5.46543	4.12501	3.14066	4.34471	4.21139	4.50515	3.0269	5.17967	5.47056	3.76134	2.80945	2.31042	5.00329	3.51166	3.68218
HTA2-neg-47419265_st	6.91762	6.77994	5.23184	5.97378	7.05693	4.07499	4.54958	2.39031	4.38512	4.81655	5.99793	4.02143	3.32932	5.03437	3.14425	5.43679	4.28038	4.82872	4.44185	4.06279	3.52825	3.66846	8.04803	2.43365	6.31815	4.80006	5.17437	5.25855	8.65612	5.43354	4.84021	3.58443	4.53366	7.56664	3.34118	6.80459	3.85396	4.45852	4.67621	5.31341	5.13932	5.39736	6.39052	5.18156	4.78697	2.11511	7.42695	4.70772	5.67851
HTA2-neg-47419266_st	6.31482	5.14025	6.09571	3.68	4.91081	5.04538	3.22575	4.39815	4.02955	4.11505	5.03468	3.88554	5.66448	5.08719	4.31628	5.54482	3.5652	5.01648	4.92916	5.84044	4.56058	9.12585	6.10448	3.92918	3.1888	4.38829	3.82402	6.91205	7.5239	4.34689	3.76211	4.7462	5.05513	2.66697	2.72034	2.59031	5.30453	4.30518	6.14473	2.79753	2.83564	6.27778	3.87195	5.90851	3.29457	3.45179	2.77472	5.17365	3.54941
HTA2-neg-47419272_st	3.86171	3.89359	4.22492	4.33564	3.51733	4.00831	5.58563	4.46029	4.60737	5.37108	2.66813	4.11589	4.47647	4.27495	3.15074	3.79722	5.79568	4.45121	3.96874	5.66114	4.50736	3.13231	3.6134	4.14401	5.68197	3.51904	4.14578	3.93702	3.57114	3.37997	6.4678	3.64558	4.42203	3.28639	4.71794	4.24462	3.55929	4.35391	4.72671	5.27031	2.88256	4.0856	3.9198	2.68805	5.28976	4.57077	4.96553	4.00002	5.58673
HTA2-neg-47419277_st	7.77717	3.53285	3.72552	4.96522	4.59068	4.88585	5.4369	3.68373	5.77878	4.47045	4.96078	3.88916	3.83246	6.41294	3.82027	5.86959	7.25347	4.58539	4.20714	4.98814	3.98878	5.24449	4.27193	4.94181	5.63201	5.28767	3.85203	4.27719	5.86295	3.30861	3.36196	6.39367	5.16349	2.67777	5.51688	3.52247	3.94985	5.52373	4.01307	4.4853	3.52793	4.59639	2.98455	2.98339	4.07313	4.28214	3.21794	5.03357	5.74668
HTA2-neg-47419281_st	3.09918	3.51842	5.21073	3.05502	3.2972	3.64102	2.64713	3.54094	4.34008	4.3258	3.54302	3.56635	4.31545	2.81671	3.50366	3.73382	2.20021	2.6762	4.61303	3.40569	3.1701	3.66578	5.46788	4.47151	3.6432	3.61493	3.43628	4.21834	3.1335	3.06143	4.08593	3.47026	4.57649	4.63158	3.05456	2.94424	3.18374	4.10548	4.63737	3.57166	2.83567	2.31696	3.29779	2.69079	2.74148	3.44113	2.91832	3.88946	3.1688
HTA2-neg-47419282_st	5.41288	6.08812	5.42956	5.33364	3.69673	6.42912	4.29566	3.91031	6.83359	4.50401	4.64895	6.17821	3.97188	3.42895	2.78983	4.74163	4.65464	5.76242	3.69975	2.91481	4.54161	4.08235	4.50178	4.19779	3.95607	4.72965	4.30849	4.72481	3.19264	4.47462	2.99524	3.47425	5.52299	5.44126	6.16208	2.9349	4.71653	4.06506	3.02087	2.83078	2.61201	3.05103	3.84564	2.89641	2.99562	3.04044	3.786	3.24974	5.39374
HTA2-neg-47419283_st	4.94948	4.29955	6.06498	3.34774	3.61921	2.51683	3.80281	2.60915	4.01337	3.39649	4.20518	4.17712	3.9079	3.024	2.70737	4.19849	4.36711	3.57824	4.17441	4.31915	3.27323	3.79993	4.35163	3.80233	3.62276	4.20883	4.51255	3.72638	5.08153	3.18445	2.95501	4.31972	4.48504	3.49338	4.46984	2.75127	3.82281	3.89655	3.5751	3.1083	3.07597	2.83192	4.70071	2.54783	3.29814	3.26431	2.6886	3.17711	3.53906
HTA2-neg-47419358_st	6.13688	5.71565	6.44991	6.07993	6.71804	5.37422	4.93787	5.1285	7.10822	5.7971	5.70868	5.38062	6.99724	5.00168	5.34017	6.36477	6.30508	5.06561	8.92056	7.09538	6.56687	7.17722	7.64294	5.62637	6.30401	5.91869	5.4035	5.55045	5.95835	6.53828	4.78113	4.68088	6.81388	4.4204	6.29093	4.70756	5.61984	4.70294	5.10801	4.71556	4.0027	4.41963	4.19844	3.37444	5.04221	3.96855	4.12754	3.57872	6.18079
HTA2-neg-47419392_st	3.06881	3.08332	2.74019	3.36806	3.14678	2.75579	3.26719	2.92735	3.00656	2.86135	2.77463	3.01658	3.01136	2.51834	2.73213	4.20417	3.01358	2.63145	3.3625	2.80012	3.37116	2.67857	2.81849	2.84591	2.83521	3.40406	2.86083	3.08291	3.73331	3.09088	3.00841	3.49888	2.48987	3.47065	2.31682	2.60746	2.75004	3.68075	3.31795	3.31675	2.7721	2.48458	2.9213	3.53882	2.62963	3.11978	3.08088	2.61182	2.93852
HTA2-neg-47419398_st	4.87948	4.14252	5.07759	4.28223	5.34865	4.94693	3.38232	3.72138	4.7606	4.06666	3.38633	3.33117	3.82561	3.1548	2.90699	3.65309	3.66018	3.89011	3.80825	3.62937	3.15268	2.40954	2.66831	3.81097	4.82872	6.67628	5.70927	4.79522	3.84449	4.00369	6.74573	3.31429	3.23093	2.90591	5.90762	3.8618	5.10611	2.87525	3.03321	3.87973	2.74455	3.61751	3.29015	4.36059	4.80458	2.48674	3.74752	3.16529	2.56741
HTA2-neg-47419399_st	5.22937	4.45776	5.53902	6.30617	6.42954	7.12023	4.25283	4.70691	6.18008	4.64032	4.00036	5.22369	7.02288	4.3653	4.51637	4.68407	5.88176	4.13131	7.13567	5.71692	6.84916	5.74515	6.26611	5.19094	6.17346	3.42059	4.53437	6.2864	4.88674	6.47814	6.27938	5.46243	5.63559	3.44925	3.40362	4.92626	6.30362	5.21268	6.79675	4.49882	4.78168	4.80473	4.37428	3.98827	4.68322	4.67887	5.53504	3.53038	4.71736
HTA2-neg-47419400_st	4.51436	3.90034	3.7333	4.42216	5.29022	4.75768	2.78525	4.15871	4.51702	3.45855	4.3661	6.18183	5.3381	3.29662	4.93632	4.27641	4.51189	3.71149	5.4605	5.69642	5.79364	2.95323	3.64732	6.15627	3.40756	6.82256	3.38261	6.21995	4.81629	5.24336	4.01341	4.02343	3.43675	4.07447	4.11457	4.69598	3.12829	4.23931	4.25686	3.20531	3.2392	3.44374	5.16684	3.01842	3.7018	2.54862	4.44555	2.59247	4.4795
HTA2-neg-47419401_st	6.13563	6.08812	2.79422	3.30076	7.74513	4.65932	4.54958	3.72807	3.10946	4.17045	7.35747	5.91721	2.99843	2.12425	2.95053	6.09579	6.39838	4.54674	3.12217	3.34076	8.74225	3.5734	6.17949	3.95725	8.52234	6.05013	2.10948	2.75668	5.84606	4.80673	5.45548	3.62088	3.81045	3.82993	2.13502	6.5615	8.14869	3.30696	4.1658	5.79408	6.41815	4.35253	3.86355	6.13301	2.90048	5.10965	5.72025	3.12695	4.94864
HTA2-neg-47419404_st	4.37749	3.34097	2.94868	3.2949	4.07939	3.43557	2.93727	2.73233	3.53614	3.19198	2.82014	4.06836	3.06682	3.49468	3.49726	2.99028	3.42574	2.93376	4.77272	3.64195	3.13645	4.11958	2.90883	3.60327	3.89003	3.50822	4.19659	3.41808	4.01238	3.08336	2.68482	2.90503	3.0277	2.68833	2.66928	4.3845	2.48952	3.58022	4.04573	4.56851	2.72163	2.80474	3.5815	3.93371	3.07763	3.68517	4.96202	3.19867	3.29177
HTA2-neg-47419405_st	4.0697	5.32685	5.53115	5.46376	3.99439	3.39972	4.40215	3.83979	3.98072	3.54317	3.44492	5.69293	3.5306	2.9332	3.62606	3.27668	2.74533	3.28499	4.41997	3.66978	4.25566	4.10305	3.1117	3.43597	2.4579	4.54013	3.61938	2.99574	4.38407	3.12011	3.77702	2.27487	4.01071	3.74963	3.19737	3.38669	3.3796	4.44499	4.66718	3.73107	3.2509	4.0007	3.83001	3.2073	3.07178	3.49128	2.94282	2.53232	4.07562
HTA2-neg-47419406_st	5.77426	4.04713	4.09415	6.31936	6.15278	3.8711	3.11445	5.36138	5.47986	5.26319	3.97747	4.34569	3.50451	2.91189	4.45063	6.8478	5.29873	4.64203	6.12515	5.43365	4.04951	4.43586	5.02136	3.72678	4.75728	4.60586	4.73443	3.54694	3.77193	6.50661	3.01291	5.28603	5.99919	4.31476	4.37795	4.10376	4.64298	4.48808	4.64565	3.21451	2.74557	3.98967	4.82652	3.5216	4.21411	3.30735	3.7658	3.4438	4.10439
HTA2-neg-47419407_st	6.2444	5.44904	5.83772	8.34428	6.65091	4.42865	6.3071	5.31888	6.80077	7.00538	5.42795	6.17683	7.45678	5.70816	5.29636	6.67636	6.25034	5.84869	8.8478	11.1256	6.59447	4.71967	8.13211	6.88008	6.2603	7.76795	6.66962	6.33545	7.65256	6.96188	4.29223	4.28025	7.14722	3.07947	5.05941	4.54989	4.94216	5.61089	3.85348	5.26561	5.73262	3.43852	3.71248	4.47404	5.34817	2.78408	4.80746	5.3475	6.16907
HTA2-neg-47419408_st	3.00633	3.95676	3.89099	3.30076	3.96566	4.3024	5.0395	3.71705	3.37119	2.89405	3.40086	2.9245	2.68883	3.32595	3.71188	2.50786	4.3458	3.55471	3.81987	4.21464	3.72667	3.28106	3.12611	4.77558	2.81375	3.73383	2.69968	3.81141	3.59052	4.04461	3.96973	4.84465	5.12796	4.24556	5.08275	3.48185	4.31413	4.77986	3.22952	3.79366	3.37838	3.6566	5.82009	4.18674	3.88616	3.19145	3.92944	4.29894	3.54744
HTA2-neg-47419411_st	4.69516	5.71487	4.92197	6.36533	5.04221	5.82032	4.7388	7.56468	3.95065	5.52554	4.49495	4.40212	6.87814	3.80039	7.15498	3.8339	4.34328	5.32232	5.30317	7.19877	5.85116	4.50876	4.97435	5.85596	4.13765	6.99361	4.12213	5.91985	12.3803	10.3554	10.3253	7.23215	6.75282	4.44963	4.28315	5.44655	6.12675	3.35198	3.22365	5.25504	6.4888	7.9844	5.88847	5.50422	4.07965	5.02959	4.56122	4.84592	10.0591
HTA2-neg-47419412_st	3.78393	6.6693	5.72738	5.73405	4.31899	5.01562	4.68822	4.87239	4.2192	2.9601	4.36927	5.40911	3.74094	3.04413	3.88962	3.47852	5.65156	3.67879	6.32187	3.85515	4.89429	4.31362	4.29195	3.98719	5.44891	6.44467	3.74312	3.90385	4.32476	5.95474	5.82472	5.4852	6.51982	4.18498	3.97866	2.63605	5.84021	3.41407	6.87198	5.22802	4.78857	5.32779	4.69945	5.11631	5.22387	5.07246	6.43537	6.13451	5.01321
HTA2-neg-47419414_st	5.04986	5.67898	5.57482	5.78414	5.57058	6.67559	6.01767	6.14955	6.10543	6.60103	4.17562	5.73332	5.81471	4.45409	4.42243	4.42867	5.52341	5.25251	6.56495	7.19483	5.8268	5.92809	7.02591	5.84658	5.13401	6.40362	7.20697	5.48608	5.1399	7.43358	3.3865	4.82507	5.32857	5.34028	5.4088	4.957	6.05539	5.47397	5.55045	5.83964	5.2642	4.43818	4.79986	4.1763	4.95002	4.89207	4.94852	4.39739	5.36772
HTA2-neg-47419415_st	5.64531	8.56405	6.74098	4.67224	8.29333	7.98991	7.49927	7.08086	12.5136	4.19496	6.70859	8.61251	7.07042	8.73684	7.21708	8.97205	10.452	8.69117	11.0588	13.9827	11.3902	10.0437	10.4522	5.97975	8.04879	15.8552	9.21648	8.4973	13.5372	10.5907	11.9708	9.39013	11.1437	6.02338	7.43922	6.78049	7.91752	6.19417	8.33986	7.30523	7.80429	9.70659	8.98402	6.23123	7.71157	7.18015	9.71484	6.42362	13.5974
HTA2-neg-47419418_st	2.78395	3.43909	3.03504	2.91452	2.74266	3.46844	3.33744	3.76206	4.44265	3.8878	3.35666	2.77115	3.01843	2.61501	3.32999	4.80603	3.78511	2.81615	4.80027	5.34899	3.36245	6.39543	4.23374	3.10807	4.43527	4.5674	4.54615	2.97827	4.40735	3.18457	4.71972	2.93835	3.86164	3.72759	4.10982	3.3208	4.73652	3.42929	3.88599	3.30759	4.58354	2.6504	3.64314	4.20301	3.10058	2.99908	4.5755	3.48805	3.45562
HTA2-neg-47419419_st	10.0835	10.9547	9.94072	8.18981	8.29759	8.18535	7.91212	8.65348	10.374	9.23838	7.45874	9.52516	8.8043	7.72	7.7388	8.23059	10.6098	6.45496	9.14083	10.1853	7.01376	8.78233	10.8262	8.6977	8.0744	8.26406	8.21072	10.2724	10.8195	9.3849	7.19487	6.3662	8.6714	4.73458	7.26483	6.35327	8.1809	4.83393	5.6163	7.45396	6.90782	6.96168	5.07002	7.25527	4.91695	7.30638	9.61751	7.08093	8.02775
HTA2-neg-47419421_st	6.55477	6.31759	6.05094	4.85291	6.00157	4.5105	4.9361	4.27209	7.04627	5.27622	3.86957	6.22006	4.72649	3.70606	4.41979	4.81355	5.0335	4.59728	6.92308	7.0401	4.22608	4.85608	6.68557	5.4566	5.22164	5.31712	5.11334	6.32178	4.98073	5.07616	3.78374	3.45218	5.286	3.55087	2.80283	4.70844	4.0877	3.98117	3.8127	3.02152	2.7699	4.55108	4.23193	3.6225	4.28341	3.26618	3.48502	4.70871	4.07311
HTA2-neg-47419422_st	4.65902	5.29064	3.12996	8.12586	5.9505	3.58628	4.89131	3.83416	4.32727	5.99507	3.44586	4.55028	5.55529	3.43768	4.09214	6.40241	5.99895	4.19023	6.92936	4.32035	6.44363	3.9436	3.6265	4.90054	4.92391	5.65702	5.51532	5.95378	7.27994	2.65668	4.84021	6.01652	6.16082	5.50746	3.34118	3.2113	5.69927	5.22185	4.28581	3.47181	2.63585	2.53271	4.59144	3.56873	2.71639	3.01454	4.28784	3.29355	7.44995
HTA2-neg-47419483_st	2.48889	3.0489	2.53335	2.29766	2.46303	2.4435	2.59577	2.63106	2.51629	2.46756	2.61019	3.01782	2.64882	2.43505	2.27977	2.895	3.6356	2.69248	2.74025	3.58904	2.41151	2.56382	2.30513	3.31747	2.74446	2.33598	2.46604	2.76134	3.02088	2.21752	2.6532	2.14524	3.28819	2.90778	2.57936	2.29007	2.9357	2.15386	2.78246	2.89115	2.11177	2.07858	2.33975	3.20126	2.21713	2.23053	2.70945	2.83994	2.26066
HTA2-neg-47419517_st	9.27518	6.66348	6.6698	9.95601	5.82526	7.34446	5.99185	6.34352	9.6106	7.95527	6.90235	7.22495	9.1684	7.53444	5.59303	8.14553	7.73596	6.83814	8.43011	10.2443	8.18032	6.79994	9.88559	5.95248	8.02587	9.12025	7.88839	8.4421	7.8824	6.32088	6.46453	6.11745	6.80246	5.77328	7.32201	4.98828	8.00243	6.43324	5.98345	6.20983	5.31633	6.6154	3.39484	6.41587	7.01811	6.5615	6.05973	7.51038	8.43052
HTA2-neg-47419523_st	5.20925	5.57894	4.02245	3.83222	5.43427	3.82878	4.33248	4.29256	4.29787	3.43421	3.38664	4.94807	3.62429	3.77536	3.43939	4.04399	3.764	4.27779	4.75631	5.6108	4.2191	2.99589	3.94707	4.74886	4.70132	5.08093	4.32191	5.10043	3.62726	4.24946	4.95958	3.82335	4.31283	3.79989	4.09085	3.83846	4.36052	4.18925	4.54077	4.13971	2.81897	3.77072	3.67637	3.42746	4.00414	2.8884	3.08758	3.70771	4.2622
HTA2-neg-47419539_st	3.22377	4.58391	2.78638	4.67311	5.52225	4.82911	4.33184	3.23067	3.22697	3.16504	3.55864	5.02552	3.97311	3.85622	2.86007	3.69828	3.46734	2.86006	4.4104	5.52975	3.62438	2.84747	4.03698	4.38849	3.21764	4.04982	5.29732	3.8141	5.24332	4.10498	5.41781	2.47627	2.8479	3.10067	3.75596	2.80724	3.46326	3.61272	3.25487	3.33484	3.39687	2.66867	4.0961	3.82759	4.16306	2.65066	3.76984	3.74993	3.87692
HTA2-neg-47419557_st	5.42999	5.75251	6.61544	5.02696	6.78524	5.70011	5.90119	5.78254	5.97351	4.90238	5.49262	3.65357	5.05736	4.46464	4.94232	6.65886	4.03455	5.06519	3.9331	6.61756	5.18976	6.75441	6.78406	4.48064	8.12913	5.49613	4.52673	6.84762	3.40582	5.25012	5.25943	3.12425	3.83385	5.45988	4.12709	5.46668	4.92317	4.6306	4.95197	6.35294	6.7441	5.87242	4.85646	4.51257	5.72478	5.82114	4.56971	5.02453	5.74751
HTA2-neg-47419564_st	6.01626	3.46395	6.0844	2.94583	6.26276	6.8825	6.5076	3.24287	6.30527	4.17045	5.18508	6.36627	4.18188	3.27849	4.76453	3.43907	3.1281	8.24751	2.7335	11.6745	4.91595	7.54141	9.90853	5.97579	5.17704	5.41905	7.14175	9.27633	4.2808	3.24894	3.00075	5.88921	8.84774	7.05078	5.18832	4.80028	12.1164	5.05115	5.90961	3.47181	3.8739	2.31851	4.23659	2.82862	6.42221	8.87926	6.36546	3.39369	2.90304
HTA2-neg-47419566_st	5.10666	5.05127	3.89739	4.68279	4.24172	4.80132	3.846	4.06775	5.00879	4.00546	6.32729	4.81849	4.03256	3.62068	4.13212	3.78798	4.02967	3.22445	4.39704	3.79507	5.23093	3.59179	4.20437	4.30258	4.02989	5.20489	5.54239	5.1164	4.15215	4.90448	5.49502	5.64126	4.83449	4.17562	4.64413	4.44163	4.43381	4.35858	3.45728	3.89733	4.17955	4.76224	4.32568	4.31818	4.55977	3.82159	4.19532	5.30785	5.52601
HTA2-neg-47419567_st	6.67333	4.95085	5.14482	3.91785	5.95745	4.4759	5.16799	4.9054	7.10286	5.86415	4.59386	5.0598	5.54296	3.95864	4.32097	5.73813	5.66603	4.41534	6.71787	4.53228	4.85216	5.06932	6.16813	5.14228	5.59817	4.28862	4.26455	5.25821	5.19411	5.97628	5.92596	4.87546	4.30581	4.66078	4.63314	3.63159	3.8042	4.49936	4.66618	4.77502	4.08373	3.78231	3.63975	4.27145	3.61841	4.3888	5.75102	3.74151	5.16472
HTA2-neg-47419569_st	7.80195	3.73294	3.98619	4.0745	4.75266	3.74174	4.45888	5.58874	4.47385	3.55575	4.30415	3.97308	5.3718	4.62418	3.67511	4.16843	6.41281	4.54263	6.19527	5.52771	3.75538	5.37998	5.08631	4.00531	5.68786	4.11257	7.15692	5.21754	5.42959	4.32202	4.15562	6.14027	4.86732	4.32036	4.88241	5.94264	5.36522	4.02949	6.68618	4.69404	5.07931	4.81052	5.65255	5.52957	4.30418	4.9131	5.23246	6.11758	3.63644
HTA2-neg-47419576_st	4.0777	3.49432	3.53432	4.55037	3.79774	4.69999	3.90139	3.7902	4.551	3.14672	5.18508	4.2258	3.53369	4.03673	2.59151	2.81968	4.16961	5.2337	3.30633	5.4466	4.38082	3.04559	5.73418	4.85488	3.45212	5.41905	6.1167	3.57702	3.26613	3.24502	5.2311	4.83107	3.23093	5.30125	5.79788	3.53345	4.44542	5.27962	4.59487	4.26653	4.17849	5.95592	2.62195	5.49278	5.68969	3.43914	7.15031	6.2717	5.21883
HTA2-neg-47419586_st	5.20809	5.15076	3.88146	3.1194	4.27706	2.90943	4.00159	2.68901	3.51356	3.79163	4.38178	5.24913	4.25484	6.77548	5.61277	3.03157	5.5718	5.17347	3.69654	8.01464	6.01766	5.30872	4.29238	4.49363	5.16065	6.82233	3.35379	3.87283	3.12155	5.45503	2.51981	8.54777	6.06251	5.09057	3.25027	4.23506	5.69618	5.76534	3.51825	5.50233	3.68555	3.8218	4.909	3.54608	4.11738	5.32888	4.63625	5.13953	6.41513
HTA2-neg-47419587_st	4.87816	4.7855	4.72346	3.46485	4.66524	4.71215	3.30769	4.96181	4.0292	3.63174	2.35578	6.79686	3.49759	4.79148	3.66564	3.76002	3.29379	2.87494	2.30965	4.56496	4.24953	2.36157	3.07394	5.50308	3.19286	3.58401	5.31047	2.93753	4.89599	5.91441	5.16128	4.26848	4.93082	4.67815	6.06779	4.36704	4.13528	6.37527	5.40784	4.37586	3.69606	3.14574	5.02415	3.60351	2.6088	5.51699	3.41536	5.65591	3.25356
HTA2-neg-47419588_st	4.6653	3.93014	4.15447	4.56897	5.30195	3.14908	7.50064	4.27639	2.74192	6.55648	3.73016	5.27679	3.08125	6.55142	4.52157	4.15748	3.50312	6.88968	4.35722	4.49787	2.78566	3.58725	4.10931	2.915	5.74299	2.68231	2.4151	3.10087	4.55476	6.0762	3.11131	2.40682	2.38972	3.26179	2.76196	2.99609	2.4439	2.32312	3.22972	2.55466	2.80733	5.07805	2.96046	2.99016	4.04346	3.27532	3.02384	2.8231	2.90714
HTA2-neg-47419597_st	5.83582	6.70955	6.4683	7.33617	6.06064	5.29405	6.79718	6.22574	8.16382	5.89203	6.36684	5.99204	5.2554	5.95521	4.17915	5.93423	7.33957	6.1152	4.81117	5.95862	5.25511	6.33751	7.98605	5.16832	5.6438	5.62532	5.61237	6.16179	5.41734	4.82899	4.45803	4.30061	5.73063	3.82717	3.75328	3.38094	4.39604	4.65509	4.1468	3.23127	3.23101	2.28958	2.92552	3.17691	3.4423	3.68309	3.70887	2.93434	4.61739
HTA2-neg-47419607_st	6.00959	5.31354	5.04229	4.17052	3.95931	6.25618	5.09474	4.59003	5.8862	6.1953	4.43391	4.89891	4.35293	7.74352	4.91661	6.55642	4.98836	9.09167	3.59428	6.31439	6.30731	5.31022	6.1022	4.71846	5.28284	7.27213	7.19947	6.01667	5.99424	5.21784	7.87113	5.53383	4.65638	3.88838	6.5097	5.05483	5.30581	5.22226	5.52	5.12935	5.14202	5.31957	4.67495	5.44793	5.10385	4.97243	7.98857	5.76899	4.85675
HTA2-neg-47419608_st	4.0777	3.64165	6.27958	6.09479	4.43881	3.36926	4.13813	3.98072	3.60602	3.42781	2.90401	5.00759	2.36373	2.68614	2.7873	3.63485	4.89131	4.397	5.12872	3.53654	3.78317	4.80875	4.24869	3.1412	2.66456	2.58571	3.2365	2.668	4.62253	2.83749	9.40297	4.23723	4.93082	4.17744	5.47224	3.83522	4.61293	4.72819	4.00289	4.65135	3.79609	3.43852	5.75019	4.30503	2.44644	5.17466	6.60648	4.86918	9.05332
HTA2-neg-47419614_st	4.21398	3.79515	3.56041	3.65892	3.44127	4.03342	4.12142	3.23153	5.18658	5.54218	3.00234	2.93466	3.62149	3.06444	3.6234	4.04168	3.39493	3.38685	4.46503	4.98373	3.9757	3.6983	4.15571	2.6639	3.88707	5.39554	2.91242	3.26563	3.04859	3.69148	4.74539	3.56602	2.95495	3.38473	3.42854	3.25148	2.90973	2.80286	3.37846	3.18072	3.57599	3.84063	3.24533	2.73795	3.03932	4.11966	3.55874	2.20982	4.66996
HTA2-neg-47419615_st	3.88462	4.05751	4.10929	3.85092	4.36841	2.86489	2.97845	2.49099	3.08446	3.38921	3.055	3.19921	4.92737	2.64084	2.77346	3.50492	3.59156	2.366	2.95389	3.56229	4.41344	2.76704	2.22899	4.21211	2.44553	4.21816	2.78324	2.74354	3.76627	4.83264	4.20384	3.28465	2.82262	3.81011	2.96575	2.91183	2.90658	3.15754	2.5224	3.87321	2.42845	2.98985	3.84013	2.68871	3.84461	3.26096	2.4396	4.25963	2.09761
HTA2-neg-47419616_st	6.09019	6.7222	3.17722	5.95134	4.1273	4.84319	5.7852	5.05701	8.07624	7.0193	5.77277	6.74692	5.20998	4.80228	4.42306	7.3863	4.98133	6.02572	5.86009	4.92606	4.33718	6.47581	5.76002	6.56063	4.8468	7.83505	8.12375	4.23917	7.41322	4.56811	4.76416	5.78555	6.15001	7.72931	8.17229	7.28847	5.81054	3.35073	8.52593	5.4877	5.28635	4.84774	7.85588	3.955	6.76402	6.96519	4.26992	4.87171	6.918
HTA2-neg-47419618_st	4.77404	6.33262	4.40737	3.6723	3.2703	4.58984	3.26301	3.8544	2.55247	3.59243	3.41827	4.587	2.43914	3.63656	3.85888	3.69006	4.10283	5.09426	2.58345	3.40921	8.90114	4.46911	3.75769	4.81206	2.73516	7.3892	5.32034	4.21785	3.38124	5.78	2.50508	2.41796	7.13363	2.29997	4.56851	3.34874	5.58627	2.6899	4.14199	5.29934	5.05401	3.83835	3.49191	3.27141	5.01924	4.66833	3.42785	3.26136	3.9948
HTA2-neg-47419619_st	3.76779	5.27847	3.19809	3.26282	4.42931	4.84391	3.96347	4.39372	3.94183	4.20246	4.75313	4.32239	4.69463	3.2644	2.98209	3.5363	5.72523	5.61953	6.02791	3.60012	3.17633	4.30092	6.43838	3.55644	4.81248	3.71404	3.98846	3.73655	4.05662	4.91128	4.06934	5.65555	4.97076	4.37442	5.5957	4.19888	4.62118	3.68385	4.18215	4.21786	4.28731	2.70329	4.56393	3.74949	3.45167	5.34413	6.00281	4.40601	5.73046
HTA2-neg-47419620_st	3.82969	3.55019	4.04376	3.36207	3.36866	3.574	3.50763	4.36783	4.13609	4.14304	3.70196	3.5599	3.23052	2.84728	3.49215	3.58064	3.72221	3.64601	4.13481	3.42942	4.77793	3.23631	4.62118	4.23926	4.07485	4.26638	4.25482	3.45702	3.62356	4.13602	2.55655	3.37529	2.89967	3.21384	2.98721	2.69001	2.87013	2.92121	2.63286	2.5907	3.17828	3.54053	2.81112	3.3392	3.36252	3.54577	3.26461	2.09194	3.32954
HTA2-neg-47419636_st	7.77856	3.79476	7.07959	4.17494	4.84542	8.4544	8.52753	5.96524	5.62856	9.57475	6.78433	5.06183	5.26927	6.89511	5.49904	4.69779	4.06697	5.41212	5.22953	5.06114	7.12932	3.57042	6.09366	6.69963	6.86704	6.69746	8.50359	4.92694	5.7701	3.42468	3.95651	4.78698	8.10233	7.39187	4.22248	7.20156	8.47715	6.99775	3.09678	6.96286	4.92872	6.73748	3.94231	4.22117	3.9062	7.06176	8.98409	4.54735	5.61931
HTA2-neg-47419637_st	4.83407	5.66415	6.69176	3.718	4.39704	3.50791	4.29871	4.58026	4.93789	3.40958	5.55357	4.6091	3.79241	3.68831	4.54872	4.09035	4.84307	6.19285	4.34112	3.65959	3.62231	6.5922	5.75797	3.80438	5.43206	5.33823	6.54225	3.44696	4.21422	3.4649	3.07578	4.12987	5.17181	4.31503	3.0171	3.97544	3.84593	4.89091	4.07853	4.56345	4.02812	3.6241	6.29447	5.23548	2.94822	3.51781	7.13675	5.28205	4.33109
HTA2-neg-47419640_st	5.76246	4.56516	5.55394	6.27938	4.33287	3.73621	4.55609	4.35326	6.65886	3.33464	5.86126	6.41282	6.56738	6.00653	3.87287	4.16399	8.20718	3.58661	6.20217	4.4476	5.04549	7.13496	5.5349	7.18836	4.96838	6.14999	4.46885	7.11555	4.9311	7.65248	5.49872	5.05707	8.05499	5.75304	6.91756	5.09846	6.09843	6.10248	5.84289	6.12254	4.96028	6.49993	6.68389	7.59118	7.87681	5.87056	6.16544	6.79898	4.13494
HTA2-neg-47419651_st	7.6401	4.28083	4.29408	6.77236	6.98977	7.76438	5.21521	4.69782	6.30527	4.42631	6.37948	6.71473	5.57737	4.65621	4.90189	6.4311	6.44336	5.53441	5.0518	4.66993	7.09813	6.69449	8.25066	4.97715	6.44994	5.32681	3.69408	6.1673	6.41091	5.42271	3.10465	5.7078	4.76211	6.15072	4.3222	4.29184	3.48191	4.81686	3.92369	4.70219	3.89162	5.12641	4.42465	2.88714	5.61495	4.89062	7.35371	3.12695	7.09144
HTA2-neg-47419652_st	5.83121	4.75011	3.04848	3.69134	4.88075	5.60228	4.39961	3.2952	6.00988	4.13153	5.69066	3.92303	3.33295	3.35062	4.66109	4.53819	4.97685	4.27475	6.07592	5.48515	5.37537	2.94411	2.90865	3.60181	5.14193	4.82785	3.65282	5.18833	4.64151	4.27052	4.00847	5.1335	4.4005	3.76064	3.80342	3.97265	3.84754	4.22845	4.20279	3.75585	3.94097	4.44569	5.00049	4.87445	3.64523	3.6494	4.8457	4.37454	5.17413
HTA2-neg-47419654_st	3.94465	2.80292	2.94205	2.60942	4.10914	2.63262	3.06511	2.52313	3.57801	3.32346	2.90821	3.14752	3.07201	4.10302	3.50643	3.43093	2.6413	3.21612	2.5961	3.20099	2.5945	3.61489	2.59023	4.03424	3.26466	4.06311	3.27802	2.42966	2.4965	2.51537	2.97807	2.52991	2.81041	2.8648	4.2363	2.76552	3.03125	4.54633	2.53982	2.84115	3.19195	2.6504	3.87067	2.70382	3.66073	4.51789	3.32234	3.01923	3.84651
HTA2-neg-47419657_st	6.85443	6.73903	6.97746	5.31901	6.29656	5.55847	6.89259	5.44577	6.40098	4.25299	5.6114	7.21375	9.16965	5.56555	6.50406	5.70166	4.96511	6.76015	13.2236	8.38786	5.35402	8.3533	7.56238	5.756	6.52587	6.1018	7.45498	7.97221	7.04244	7.02432	4.98169	6.78765	7.3119	5.94995	3.70244	5.06066	7.7924	6.22328	4.60753	4.20597	5.17046	5.10965	5.0583	5.46262	4.18472	3.60416	6.3344	6.04477	6.41513
HTA2-neg-47419658_st	4.0394	3.00367	3.37439	3.54361	4.30024	3.90972	4.29239	3.9897	4.31071	5.47096	3.72419	3.7621	3.04343	3.82463	3.22271	4.47701	3.67607	2.94716	4.34415	2.58776	4.293	3.7898	4.75768	3.85046	2.89104	3.88602	4.67977	3.3771	3.90151	3.99824	6.48631	4.87403	3.22888	5.1754	3.74509	2.85432	2.78343	3.92507	3.58797	2.99359	4.25736	3.09007	3.14328	5.27417	2.94136	5.98206	4.56373	3.63109	3.23128
HTA2-neg-47419661_st	6.78798	4.39061	6.42906	7.60997	7.29841	6.35259	4.47127	4.63296	5.78261	8.09972	5.42544	5.97857	5.14664	7.50421	7.32083	6.23866	6.45484	6.12147	6.89227	4.5852	4.92464	6.31363	5.75523	5.27009	6.10184	8.01759	5.14054	8.47219	6.0871	5.981	6.05694	4.35128	4.8915	5.08253	7.70999	5.96408	5.03551	5.95323	4.5226	6.99341	7.61689	5.45073	7.00328	5.30715	3.63431	2.90048	6.35292	4.56807	5.15582
HTA2-neg-47419663_st	5.27509	5.71843	4.37301	5.06247	3.71459	4.17976	2.51972	3.24287	5.08554	4.89165	5.63112	3.76017	4.60496	3.95452	3.2493	4.07495	8.77132	3.34261	6.47379	3.79621	5.17504	3.77011	4.05395	7.93455	3.37862	7.02805	3.86037	3.54592	3.91619	3.41152	6.34221	3.44093	4.13452	4.03706	4.71685	3.28228	4.85958	3.11958	5.25314	3.51332	4.04098	2.36452	4.57761	4.12232	6.03911	5.05501	4.12232	5.00238	4.24647
HTA2-neg-47419664_st	3.92874	5.232	3.15721	4.69043	4.34985	5.02712	5.82306	3.90885	4.41661	4.43549	6.22197	4.47284	5.02467	4.56947	4.90165	6.58604	6.89035	3.94802	4.93501	5.31804	4.87317	4.96093	6.16684	5.66986	3.34716	5.09096	3.86508	4.73496	5.52363	4.50252	7.15886	3.32408	5.13787	5.23601	5.03809	4.53368	4.92027	3.02384	4.24765	3.23934	3.35041	2.84945	5.43064	3.77344	3.9343	4.94828	4.98437	5.076	5.55613
HTA2-neg-47419666_st	5.83743	3.16107	4.53691	5.58086	3.52849	3.64807	4.0191	3.8689	4.29594	3.05189	3.65699	5.12046	3.66829	3.36594	3.00674	2.86647	10.1721	4.72248	3.61573	5.3489	5.07238	4.88489	5.07382	3.28785	3.64798	3.37941	4.7145	4.52597	3.10906	4.98549	6.53176	6.3467	3.38547	3.5953	3.69765	5.43215	5.87576	5.02745	3.89641	6.51868	3.52826	4.99278	4.13073	3.2902	3.53514	3.63658	3.83582	3.53168	4.70737
HTA2-neg-47419667_st	3.87188	3.43584	3.08802	2.96419	3.30314	2.8369	2.88806	5.44282	2.88007	3.36911	4.32508	2.5063	2.46806	2.51973	4.27763	3.02445	10.436	4.2194	2.9128	3.74173	4.32659	3.34315	2.31256	2.82552	2.94565	2.60621	3.59792	4.87331	3.29769	3.22917	11.2122	7.60934	3.73854	3.66806	6.55244	6.34869	5.04895	4.34471	5.50078	6.54496	3.03613	3.75974	6.01046	3.11375	3.01034	2.40203	7.65094	6.46286	6.33839
HTA2-neg-47419672_st	3.86165	4.62035	4.76216	5.12025	3.30389	4.50116	4.41608	3.20259	4.89688	3.3675	3.51596	5.28775	5.24067	3.32728	3.55268	4.59008	4.31148	2.93449	5.03084	3.55949	4.26345	4.13561	4.20992	4.08824	4.21901	4.15498	4.27352	4.10981	4.48409	3.35592	4.44061	3.3149	3.69421	3.17075	3.96592	3.10662	3.10173	3.34297	3.81952	4.3448	3.75636	3.85837	5.06205	3.28933	3.32305	5.43192	4.91854	2.568	4.63371
HTA2-neg-47419686_st	4.71664	4.11488	5.29289	8.844	2.56066	4.29957	6.45592	5.14235	5.37222	4.16904	3.87197	4.70741	5.08229	3.89136	4.56679	3.35829	3.8991	2.92356	5.53733	6.25805	6.2112	6.37381	4.30631	4.7923	3.02624	2.96951	7.14162	5.23529	6.11456	6.82074	7.42428	3.2657	5.4678	3.88016	2.34717	4.4814	5.0703	3.78697	4.52792	4.94283	2.99292	3.27271	4.57999	4.9425	3.15338	2.46526	4.14266	6.35888	3.80165
HTA2-neg-47419687_st	7.03489	7.06828	6.45496	2.19604	4.56562	5.54348	4.89229	3.72807	5.40656	5.63656	3.97211	3.10625	5.57085	2.84679	3.04008	4.61279	4.41341	3.29342	3.43857	3.23443	4.75768	4.74973	7.65214	4.3261	4.24784	4.12217	5.75868	5.95195	6.99328	5.77318	4.66425	3.70974	4.53061	5.26958	4.32039	4.31307	4.55764	3.34463	4.85084	4.41548	5.23483	4.07359	4.55357	3.4484	2.52762	5.5729	4.05307	4.17902	5.76135
HTA2-neg-47419688_st	3.23112	6.47097	9.34042	6.92305	7.57873	5.74578	7.0106	6.72776	7.17731	7.45752	7.21219	6.66964	4.87529	4.12459	6.81115	8.53756	3.95851	7.74127	5.54017	6.40657	6.53297	9.09186	7.74127	7.40756	7.19659	6.77709	8.33336	8.13961	7.20032	6.36552	5.03144	7.42392	7.72699	9.84222	5.54484	6.68179	5.60692	7.78082	6.60151	6.7166	7.74507	5.75417	7.19089	5.70366	6.8786	6.17756	5.16384	5.76636	7.3421
HTA2-neg-47419691_st	5.02664	5.09484	3.80889	6.04701	7.96014	6.90081	3.98387	4.55969	5.84553	7.63577	3.80183	3.93272	5.03967	3.54864	5.2359	4.89515	4.61959	4.20122	5.02391	5.45608	7.7165	5.61964	6.46082	6.1801	4.88932	4.41405	4.80158	5.32014	4.70813	5.89903	4.1402	2.98271	3.74839	4.1217	2.86937	3.75907	3.3381	2.94356	3.7756	2.83078	4.70088	5.38015	3.61234	4.83553	7.14167	3.65608	5.2276	4.24518	5.2225
HTA2-neg-47419692_st	3.1478	3.64165	3.1288	2.71956	3.85175	3.51607	4.78066	3.00323	3.60602	6.03464	5.12674	3.26088	4.06526	3.50213	3.17102	3.4872	3.58988	5.92908	3.77016	4.08836	3.89625	4.53365	3.39111	5.79453	3.19286	3.23967	5.31047	3.71694	3.13779	3.34827	5.16128	3.2896	3.45429	2.95614	3.5922	3.16121	4.05858	4.59833	6.36622	2.91531	5.23569	3.1382	2.67008	2.75227	3.53255	4.59738	3.52838	3.22183	4.33204
HTA2-neg-47419693_st	5.80286	6.65988	4.85248	4.5489	4.58077	5.42335	3.83849	4.12359	4.35555	3.30171	4.28048	3.6495	4.49247	3.01564	3.11456	2.6596	6.37713	4.5446	5.15252	5.95897	5.60933	3.14763	7.69876	2.80834	3.00767	6.05349	4.04621	3.65729	6.05087	2.61728	4.01817	4.27336	2.73972	2.5805	4.22512	2.86222	2.48952	2.7001	3.75378	2.92659	3.51102	3.26653	2.67008	2.82944	3.12051	2.901	4.88315	5.02415	3.61459
HTA2-neg-47419697_st	5.33393	5.73895	6.61065	3.62193	5.33807	4.98353	5.85901	5.27823	8.18611	2.66774	8.02117	5.76647	5.55349	4.7761	4.45234	5.57363	9.09103	4.14362	6.0844	5.95915	5.17504	6.19752	4.80469	5.75337	7.31758	3.74464	7.79032	3.25042	9.7859	5.81145	5.60811	6.11433	5.0302	5.12752	6.34252	4.21977	2.92129	7.53182	6.92139	5.73028	4.05572	3.79466	5.06428	4.44371	4.69047	3.17247	4.54402	8.64406	5.6766
HTA2-neg-47419698_st	9.1822	7.51285	5.92559	5.70063	6.17264	7.02452	6.5417	4.42856	7.98299	7.49619	6.45344	5.93033	7.09227	4.08733	5.49197	7.28859	6.38632	7.07749	9.64137	7.04976	5.38984	7.4948	9.07543	7.03949	8.28545	6.62294	6.1036	6.87663	8.42441	7.16536	8.30389	5.32094	6.16259	7.25913	6.33292	5.95654	8.20335	5.88968	6.85366	8.78606	4.76472	6.20637	6.15711	6.79414	6.33502	7.06683	6.70611	6.46631	6.46546
HTA2-neg-47419699_st	6.28306	2.86198	5.67036	5.53914	3.49168	5.727	7.51843	4.27742	4.65757	4.78034	5.28809	5.89266	6.16419	4.35075	5.24571	5.77902	5.82054	4.78326	4.11979	4.72752	4.59809	4.24692	6.19626	4.91948	5.26894	5.59724	6.05057	5.03114	5.97815	4.80752	5.04587	5.39576	7.22972	4.84304	6.20311	6.38079	4.62569	5.01163	7.12082	4.68238	3.7231	7.77072	6.98474	6.07929	5.24499	3.35553	3.9782	4.33414	3.90399
HTA2-neg-47419701_st	4.4783	4.3259	3.03049	4.28223	5.09433	5.02504	5.91584	5.3123	3.9714	3.51972	3.24009	6.99592	6.38721	5.92726	3.62613	4.30859	4.81594	3.82092	5.21905	4.47421	8.04637	3.25889	4.4444	5.70348	4.05481	5.38428	4.57631	4.61044	4.20543	4.70846	6.21198	4.76824	5.78822	3.68742	4.42684	5.7336	5.41052	3.78375	3.76396	5.48984	2.61201	3.73856	4.32201	4.32201	4.93074	2.41515	4.12232	4.32201	3.52832
HTA2-neg-47419703_st	4.37352	3.63569	4.46206	3.59053	3.21044	3.74798	4.54871	3.81557	4.38251	3.52718	4.48828	4.79297	2.94261	6.16647	3.19946	3.78812	4.19768	2.91049	3.14747	3.02669	4.12176	3.37927	4.41509	3.56319	2.99651	3.68479	3.78637	4.91323	4.61018	3.56978	3.21944	3.77198	4.40236	3.05302	2.47224	2.96814	2.82513	4.4197	3.64472	3.19549	3.24804	3.42362	4.13897	2.72636	3.37554	3.3061	3.60381	2.7682	3.06888
HTA2-neg-47419705_st	4.71829	3.67124	2.7343	3.42947	4.22676	3.72948	3.65107	2.98965	3.47406	4.28644	3.39173	3.96244	3.34899	2.91476	2.92856	3.20762	2.74752	3.01862	3.32399	4.53325	3.38981	3.2531	4.10601	2.62186	2.96417	5.50161	3.40934	3.64838	4.71702	3.908	2.94524	3.37922	2.87581	3.31624	4.06003	3.10931	3.30962	3.97628	3.30484	3.50421	2.95711	3.96014	3.3755	3.17491	3.82851	4.25177	3.55966	3.64588	3.38456
HTA2-neg-47419706_st	5.74108	6.94926	13.9216	9.77292	9.83943	8.32169	14.4019	8.66866	7.073	5.57363	6.23426	9.60032	5.85574	9.66066	8.59095	7.272	6.47797	9.52515	10.0281	4.06279	11.1241	6.62123	7.70937	11.724	7.31758	11.3045	11.1217	12.0726	5.08231	6.55341	6.14644	14.8379	4.93082	14.5666	9.76048	6.31736	9.32628	8.73532	6.5483	8.98806	9.95396	9.12231	6.83643	12.2261	8.50248	13.5295	8.92835	5.48445	13.3159
HTA2-neg-47419712_st	4.0777	3.83296	4.72995	8.73827	4.02679	12.5931	4.44948	6.15621	5.91112	3.80084	5.45959	10.4055	3.40757	6.62413	4.44505	3.33385	4.62424	2.9295	5.43688	3.8899	2.93987	5.41288	5.72239	6.11328	2.66456	3.42781	3.90279	4.99602	4.1812	3.19899	4.61565	3.22238	4.38525	5.07601	7.29148	4.98389	5.46469	5.75637	3.94265	5.52185	3.46646	6.20597	6.03413	4.80746	6.07712	3.17284	2.99352	3.51556	5.95054
HTA2-neg-47419713_st	7.38602	2.1222	3.73069	4.58836	4.37081	5.44152	3.66142	3.24287	3.3433	4.14919	4.74819	4.1139	3.73477	3.40639	2.30062	2.79536	3.25726	3.40279	5.97579	3.5319	4.05706	4.14332	3.88815	5.34115	3.25852	5.88502	4.20244	2.61297	4.35338	4.44552	3.12932	3.15827	4.59487	4.11575	4.09542	3.77295	3.71691	3.62088	3.68848	3.81045	3.68626	3.06023	3.49733	3.07805	3.63273	3.44113	4.04891	2.80139	3.58888
HTA2-neg-47419717_st	3.0964	3.54606	5.20126	3.66054	3.49428	3.47777	2.94592	5.94345	3.24113	3.69292	4.88876	2.86558	3.59382	5.67459	3.85755	5.3593	5.21906	3.48119	3.31417	5.55603	4.36853	3.36184	3.12587	3.19698	4.32131	10.3717	3.81124	3.50667	3.97156	3.12063	4.44992	4.97509	4.52322	3.34996	4.38979	3.45426	3.98642	4.06038	5.12938	3.1351	5.22336	4.07633	3.20855	3.92504	4.15445	3.89753	5.32567	3.02013	4.24258
HTA2-neg-47419719_st	4.84303	3.6569	5.18387	4.30933	5.11867	5.83592	3.45492	4.26075	4.62551	3.11828	3.81896	4.03189	4.21057	3.41356	4.04669	4.10448	4.58035	2.79919	4.91794	5.17251	5.64391	3.02767	4.49564	4.06273	3.5982	4.26497	3.47198	4.67327	3.232	4.0742	4.82644	5.52414	5.15424	4.5794	4.05655	4.36062	4.41476	5.42498	4.79145	4.04177	4.28952	3.78593	4.11313	6.48131	3.4626	4.00375	3.98053	3.15917	4.33271
HTA2-neg-47419721_st	4.16313	3.62477	5.16256	2.8209	3.20604	5.06737	4.60412	4.1076	4.5855	3.47966	3.79796	4.6115	3.88004	3.71939	4.45128	6.81626	5.66591	4.42806	3.82581	4.32338	5.16275	5.74392	3.39008	4.0336	6.7923	6.4289	4.64181	4.36977	5.06854	3.53755	5.73167	5.24792	7.2505	5.27262	6.60896	5.23739	4.37516	5.49188	6.7527	5.76987	4.15762	3.70178	4.74045	3.74885	5.69918	3.85438	4.11493	3.3242	4.28693
HTA2-neg-47419722_st	6.01626	2.82098	3.62346	2.94583	7.70234	5.80569	3.30769	4.55969	5.72152	3.17562	5.63112	2.64732	3.61635	4.62832	4.71917	5.28054	5.51532	5.92908	6.0844	4.66993	3.01507	3.83147	6.24079	5.90754	4.28038	8.98155	7.10008	6.03884	5.41905	6.8077	9.0261	6.75333	4.93082	4.26715	4.79806	6.06428	5.8609	6.5615	5.96516	4.05858	3.33407	3.79466	4.59144	4.37274	4.98173	3.04044	4.6943	4.45555	5.91426
HTA2-neg-47419725_st	5.06321	5.53355	4.5242	6.06265	4.34142	4.65435	3.23917	4.6224	6.82541	5.19042	4.85731	5.91721	5.15393	3.27849	3.38061	5.80092	4.32066	3.86166	6.77256	7.47289	3.89625	4.66289	5.06618	5.58583	3.71324	4.80006	5.31047	6.1649	4.05755	4.96589	2.85983	3.58899	6.29069	6.31174	4.91146	5.8721	5.41052	5.0251	4.48728	3.30656	2.88665	4.20798	2.98455	3.54004	4.0785	4.66833	4.68376	3.71181	5.68154
HTA2-neg-47419729_st	8.54985	4.8176	5.49997	3.86508	2.62336	6.88924	2.16716	4.41401	4.0292	2.56428	3.80183	5.70067	5.50405	6.03473	4.27141	2.30446	3.62228	4.82872	3.43857	7.66919	5.65756	3.72588	4.28504	4.84153	3.65219	5.37383	4.68378	5.25855	3.84449	6.43388	5.55095	5.81409	5.67243	3.96428	5.88849	5.76548	2.41512	5.34886	6.76858	6.70447	7.09636	3.76478	5.15201	5.52011	3.22673	2.65066	4.65825	3.0099	6.34577
HTA2-neg-47419731_st	8.33986	4.7855	4.71156	9.30835	4.37081	8.61281	4.33728	4.97318	4.71988	6.95956	2.98896	6.62615	6.55903	5.57681	8.72049	6.32253	6.76247	5.30732	4.08167	5.84149	6.84986	5.42408	5.78807	10.2247	6.48947	7.78943	4.77103	6.50786	4.70995	4.32929	4.30752	6.52422	7.3054	5.53138	7.9246	4.80028	10.2801	4.87228	5.04648	4.49666	6.04554	6.4423	6.07924	5.68622	9.6775	5.28922	8.85355	6.99395	3.60121
HTA2-neg-47419732_st	3.84893	9.06922	5.87872	4.79418	2.23406	3.36926	3.05893	2.23388	2.88551	4.32745	3.44586	2.23396	2.81798	2.02671	2.37294	13.1922	7.00332	3.95851	5.54017	4.54958	10.119	5.01793	2.35578	5.75337	6.79743	8.61735	4.35161	4.37653	10.6514	2.94809	2.85983	6.63105	4.38525	4.11273	3.34118	3.34118	2.72576	6.43494	4.89066	8.03724	2.12202	7.32757	2.55005	4.07106	4.39697	2.90048	5.81849	2.64827	1.89786
HTA2-neg-47419734_st	5.03195	4.18263	4.30769	3.33903	4.47418	2.86864	2.9729	3.73052	5.01657	4.67189	4.49814	3.02523	3.31371	2.91018	3.04515	4.13428	2.98666	3.13418	5.64888	5.146	4.68422	4.76285	4.59242	4.80297	5.19238	4.35428	3.47054	3.92708	3.999	5.02513	3.31741	5.35351	3.53934	2.6407	3.77881	3.82991	4.98521	2.97364	3.49733	4.11885	3.20193	4.10864	3.13675	3.63858	4.23353	2.94876	3.2408	4.2278	6.01363
HTA2-neg-47419738_st	7.3575	4.66468	4.98318	4.82985	5.37489	3.23745	4.73623	4.27261	2.91791	3.86723	4.25499	2.8291	3.77511	3.52491	4.13607	3.68536	3.09405	3.59082	6.2514	5.46529	4.4998	5.05406	4.82022	5.99842	4.25257	3.81694	2.85029	5.45343	2.9829	3.29858	4.62531	5.03603	4.28145	6.52552	6.58049	5.33657	3.18738	5.63545	5.12668	4.04177	4.69603	5.91141	3.57476	4.27553	4.74086	6.81356	3.67941	4.24845	3.75361
HTA2-neg-47419739_st	4.54051	5.12452	3.53334	3.60411	3.60801	4.25079	3.78831	3.17771	4.87536	4.53528	2.74916	4.23346	4.75371	4.5087	4.24108	3.10702	2.88725	3.25384	6.46998	4.64681	3.49414	3.60496	4.55193	3.53712	2.49605	5.75017	4.03941	4.75813	2.57582	2.90438	3.4909	2.99384	4.14723	4.17391	4.20872	4.46081	3.99145	3.98485	3.00291	3.31337	3.1705	3.58635	3.40131	3.0985	2.50279	3.38321	2.83383	2.71645	3.40481
HTA2-neg-47419745_st	6.1447	6.54119	5.87152	5.06405	4.52563	6.02135	6.56796	4.46382	5.32524	4.8391	5.11339	5.03746	3.67706	5.81471	8.69357	6.07135	5.14372	7.79931	7.90113	6.41767	7.3027	6.1524	5.63365	4.84924	7.88491	5.37535	5.25815	7.7527	13.5387	5.6638	4.11423	5.43562	7.32563	3.81978	6.10395	3.51387	4.41411	5.83715	3.99074	4.99704	6.86117	5.48877	4.69967	5.89052	6.52398	5.54196	4.57304	5.7543	4.23205
HTA2-neg-47419749_st	4.89635	4.54446	4.92605	3.2642	3.40873	4.11737	3.16019	2.88675	4.74605	3.32844	3.50736	5.63059	2.52008	3.13508	3.4872	3.30142	3.50769	4.05465	4.58986	5.12327	5.58506	3.78047	3.26076	3.58158	3.66197	7.07356	3.01761	4.22894	3.66076	3.49881	4.25758	2.80464	3.33708	3.64976	3.78166	3.07448	3.50586	4.21742	3.28734	2.66551	3.89594	4.07359	3.51263	4.8627	3.84441	3.65311	3.39935	4.69981	3.88826
HTA2-neg-47419750_st	6.65737	4.5437	4.79098	5.09514	5.29459	6.69522	4.69394	4.37303	4.43858	3.86669	5.22566	5.26575	4.37918	4.18076	3.91573	6.6437	5.8496	3.89213	4.29221	5.84296	4.31979	5.4719	5.52084	4.84935	5.38186	4.70413	4.222	5.92834	4.06892	6.1121	4.81684	3.95382	5.67895	5.21821	4.90676	3.80547	4.65236	3.66873	5.73629	6.65308	4.4368	4.63934	3.86255	3.79534	5.16697	4.34738	4.35821	3.99227	4.85168
HTA2-neg-47419754_st	4.14461	4.42847	6.28392	4.5428	4.14054	4.12908	3.18914	5.56444	6.40643	3.47793	5.25614	4.72661	4.0202	4.34001	3.21699	6.42332	4.60766	4.71784	5.97912	3.73193	4.67185	2.66581	6.23206	3.17166	3.33478	4.38645	4.33216	3.04423	6.56605	5.34227	6.37374	5.55904	4.78996	4.22162	4.2187	4.0499	5.78175	3.77812	4.16667	4.42602	5.00783	6.45601	5.51886	4.55928	5.63128	5.12579	5.67926	5.59537	4.84831
HTA2-neg-47419757_st	7.38848	4.81458	5.52103	4.56113	4.98553	5.60932	4.93128	4.26183	4.33559	6.13154	3.10632	4.67856	5.15456	3.91201	4.76847	6.05016	5.10192	4.51042	4.48921	6.14537	5.28756	4.6275	6.30219	3.5163	3.94753	7.60982	3.83088	4.42118	8.16025	5.00713	3.56816	4.0237	4.44706	4.78839	4.46844	3.09212	4.92543	3.8582	4.61099	4.21651	3.64388	4.20342	3.43557	3.93137	4.61157	3.84006	4.00613	4.74706	3.62114
HTA2-neg-47419758_st	5.23432	5.66395	4.7149	3.88794	5.07922	4.34704	4.21432	4.56409	4.46528	4.26553	5.64443	5.46805	5.06164	3.97657	4.2386	4.68618	4.59461	4.83489	6.05844	7.02836	5.70921	5.19348	6.27783	5.47524	5.21332	5.55041	4.90874	5.24093	6.66541	4.52886	4.34909	5.99193	5.73762	4.39118	6.00515	4.27412	4.02541	3.4839	5.09425	4.50817	6.51845	5.49547	3.49684	3.4484	5.28712	5.80296	3.95459	4.71924	6.96759
HTA2-neg-47419760_st	6.74782	4.5783	7.43509	6.12081	5.47302	5.18992	5.38817	4.1776	6.98132	5.81709	4.80361	5.80163	7.38748	5.21411	5.72539	7.39506	7.19501	5.58255	7.4569	6.30475	5.66964	3.20545	5.22304	5.99073	7.08915	5.56497	6.26073	5.73881	4.63503	7.79881	6.52513	6.87849	4.48757	6.58129	6.669	6.95696	7.03539	3.76688	7.02743	4.8826	3.1561	6.23091	5.03314	3.47075	6.09404	4.75248	5.07368	5.26449	3.87121
HTA2-neg-47419763_st	4.14759	5.19777	4.39203	3.50674	5.66439	3.75537	5.46211	3.47052	5.4796	3.94319	5.0212	2.92788	2.78317	4.87891	3.25261	6.04782	3.52778	5.64098	5.24381	5.16914	2.6308	3.89382	3.43459	3.99783	5.56139	4.22073	4.33418	3.69537	4.37619	4.55875	3.99127	5.21631	6.05173	8.58189	4.3129	4.19917	8.84931	6.18087	5.01598	4.11333	4.66808	6.94817	2.59349	7.542	6.69446	4.85848	3.47738	5.37489	3.69895
HTA2-neg-47419770_st	5.44721	3.80359	4.21553	2.69562	3.7197	4.00219	2.81254	3.72342	5.24642	3.66292	3.9923	2.54327	2.36973	3.35483	3.02921	3.37428	2.80927	4.61238	3.4674	3.49119	3.05232	4.96442	3.41938	4.03268	3.11079	5.78447	3.67136	3.74286	4.5963	3.68873	3.10439	3.6792	4.2783	3.38527	2.59841	3.08684	3.88977	3.38533	2.9739	3.10497	3.68598	4.38604	3.55451	2.84635	2.47902	3.82739	3.69442	3.4944	3.95533
HTA2-neg-47419772_st	8.45138	6.08812	4.57199	9.18993	5.40231	4.21531	3.88303	9.63215	4.43989	5.66912	4.4341	7.52019	6.30527	6.6279	4.23931	5.51739	8.9726	5.0373	6.29341	4.53243	4.05706	6.32157	4.33757	6.03557	6.635	6.97249	3.04072	5.02374	8.16556	3.84651	6.61343	5.39375	3.75339	6.35123	7.33321	5.57103	8.44858	7.05078	5.65848	7.1154	7.42836	6.80369	5.7415	6.707	3.35264	3.81424	6.50475	7.55241	6.4663
HTA2-neg-47419773_st	6.59298	6.35331	5.35968	4.8324	3.25182	3.68609	3.2736	4.01645	3.09859	3.45563	2.94204	4.71889	3.48745	5.31755	2.6483	4.76066	4.99007	3.41244	6.39455	3.81397	3.65055	4.03712	3.91713	4.71243	4.11013	4.65458	5.1328	4.04645	3.24363	3.27634	4.48127	5.40324	3.90427	4.41239	2.92297	3.97078	3.7621	4.27927	5.14051	4.55946	3.00818	3.27913	5.14877	5.09972	3.46035	4.65103	3.18368	3.60127	5.77078
HTA2-neg-47419781_st	2.12101	5.07103	2.6311	2.94583	6.05013	4.65932	2.51972	4.66993	5.91112	2.27984	11.0495	8.58538	3.27849	8.08074	3.76112	3.1281	3.27635	7.05892	6.0844	9.58748	5.68174	2.55581	3.77733	5.2126	3.63224	2.32512	6.71578	2.14522	4.14119	4.44552	4.12232	6.63105	2.32094	2.79616	6.25252	2.40909	5.094	6.02697	3.6969	3.60813	2.87108	3.05103	2.83737	6.662	10.0192	2.05005	2.12624	8.19099	6.12896
HTA2-neg-47419787_st	7.63235	4.88278	5.71912	4.6786	5.95055	4.50282	4.5609	5.02085	5.80229	6.41901	5.15481	6.36865	7.45242	3.91429	4.85875	3.93401	6.60134	5.05821	5.25684	8.46012	4.95187	5.72145	6.88643	5.1149	4.89191	5.85534	4.93466	4.75921	6.89963	4.32311	6.05222	5.02293	3.76097	4.53867	5.58776	4.4479	5.5815	5.09493	4.91743	4.73724	5.1727	4.88056	4.99912	4.22841	5.78661	3.86088	6.4817	5.10587	4.75157
HTA2-neg-47419790_st	10.7142	9.61024	11.351	9.09082	7.17948	8.28583	7.89521	6.47799	9.71935	8.54455	7.41942	8.91755	10.1618	6.36321	8.97611	7.84967	10.5305	8.27046	12.2296	11.3848	9.59428	9.36448	9.52991	7.80215	10.39	10.1692	8.6154	7.09655	9.93894	9.06424	12.6796	10.5238	11.9519	9.16361	11.2574	8.38742	11.89	9.43456	11.0674	9.74232	8.51584	9.80525	9.06413	7.10254	9.3869	7.9828	9.76433	10.0826	13.9624
HTA2-neg-47419793_st	5.22686	4.05143	3.3874	2.86376	6.07382	4.56244	3.977	5.97388	6.00546	4.47644	4.94745	5.06146	3.6093	2.95165	3.2493	3.73601	3.53699	3.17094	5.43369	3.75054	5.50287	3.98754	4.24869	4.97085	4.37487	4.04057	3.19174	4.79522	6.25412	2.89904	5.45548	4.13971	5.24641	5.46058	4.43176	4.20392	4.05575	3.62088	4.50244	3.62308	4.50909	5.38015	3.32353	4.1017	4.67507	3.39458	3.89439	3.24939	3.58888
HTA2-neg-47419795_st	10.4005	10.3683	10.9564	12.6136	8.36878	10.2003	10.0095	9.23396	5.91112	12.8076	7.21219	10.9595	13.9828	10.9165	9.06286	7.272	11.0162	6.09474	11.5145	11.0257	8.60044	13.7815	14.196	12.1465	11.5012	12.409	9.97947	11.0315	12.5404	4.44552	7.49217	12.4808	13.7714	6.31174	6.25252	5.78657	11.0273	10.5667	13.6879	10.9084	9.10108	7.32757	10.5614	5.64397	9.14244	9.34273	11.3841	7.54268	13.7127
HTA2-neg-47419797_st	5.77469	8.91763	3.64054	3.72504	5.00516	6.52862	3.49185	5.42453	4.63344	4.30742	6.7423	8.9976	7.71068	5.44182	7.32424	3.18359	7.50753	6.21711	5.46309	5.88723	6.3043	3.98868	7.03199	6.8401	8.25218	7.35113	6.71705	4.25906	4.78366	5.21824	6.91754	2.61884	5.59998	8.59593	5.53106	5.55882	4.59467	5.39401	4.48948	4.63246	6.00712	2.58652	3.20855	4.74375	6.03818	7.59939	5.47228	3.96329	4.31883
HTA2-neg-47419801_st	5.48835	4.9092	5.68532	4.06947	5.11366	2.88988	4.64781	7.5843	3.75547	3.74079	3.40778	4.93241	5.00158	8.07734	6.78993	4.37731	2.98314	3.27915	3.59188	3.80541	5.64696	10.1657	4.00296	5.85077	5.32226	4.93886	5.92836	4.15746	4.32217	5.93624	5.55016	4.90037	4.11043	4.92358	5.44015	5.61522	6.54799	7.08316	4.98005	7.1853	5.79685	7.66957	6.4364	7.22013	5.5954	7.23716	5.6098	6.60691	3.63706
HTA2-neg-47419807_st	3.0547	2.58506	3.99745	3.17001	2.59125	2.50381	2.58151	2.58587	3.49598	2.46379	3.45894	4.65168	3.19987	2.75688	3.18917	3.41296	2.19137	2.27974	3.43857	2.14323	3.17186	3.25889	3.59938	3.79139	3.08094	3.42781	2.16046	2.44399	3.65981	3.68774	5.24816	3.33729	3.2667	3.53498	3.95585	3.35337	3.91283	3.22056	2.60892	2.71899	3.13449	3.05103	3.69293	3.04036	5.08583	3.69997	2.72895	3.15325	3.4314
HTA2-neg-47419808_st	8.31487	3.30548	6.14583	4.29914	2.6527	5.67573	4.93498	3.29637	3.23191	3.75154	3.66967	4.77928	5.48951	3.37628	3.8024	6.58987	3.95493	4.45236	6.56048	5.3502	4.4256	6.51263	3.67507	5.84838	4.68628	4.27174	4.95794	2.72512	5.73297	5.09732	5.32935	3.02895	6.04226	5.42403	6.08542	5.07705	7.21717	6.4447	6.11515	5.36536	4.98497	7.52948	5.4998	3.84541	2.99073	5.0077	4.77004	3.83061	6.37236
HTA2-neg-47419811_st	8.08505	4.73203	5.98303	4.40466	5.96649	6.79814	6.83248	4.59958	6.36571	6.96586	4.39447	5.33437	7.58598	4.14497	4.55465	5.83207	7.27761	4.42971	8.04376	6.78581	6.13858	7.72529	3.82934	4.70813	4.74181	5.05571	5.31047	4.81904	6.03464	5.21797	5.02476	5.89965	5.38383	5.15781	4.82864	5.0022	4.32769	4.70123	3.0361	4.7552	4.32344	6.69582	6.28222	3.54004	3.79306	4.66833	6.18383	4.87687	4.41255
HTA2-neg-47419815_st	3.719	7.11884	4.92367	2.86727	3.85102	5.06382	3.95797	4.75582	5.01099	2.64801	3.01803	2.84247	5.75108	3.53655	5.61062	4.63716	4.28922	4.20122	6.67542	3.52818	5.42278	5.29831	4.98956	4.67091	5.52962	3.36854	4.96379	7.36517	5.6107	4.55043	4.64035	4.62776	3.13417	3.63115	4.69022	4.78303	4.26521	4.55028	5.18429	3.35496	3.99558	4.64577	3.6727	3.13508	4.31712	6.50189	3.41573	4.43232	6.16157
HTA2-neg-47419816_st	5.42174	5.9692	4.96068	3.98334	4.59694	4.75412	3.83544	3.83405	3.46398	4.28077	5.37692	4.27583	4.78885	3.96073	4.30756	3.60846	4.19339	5.16444	3.8406	4.07547	4.21888	3.81389	4.00365	5.00567	4.58906	4.2399	4.02566	5.6329	4.00109	4.31852	4.3798	3.29914	3.36087	3.76065	4.85695	4.14166	3.88983	3.81944	4.76831	4.68875	3.94566	3.21844	5.35676	3.92175	4.23704	5.42523	5.07007	3.90719	5.20735
HTA2-neg-47419818_st	3.73813	4.92637	7.48924	5.70207	3.89335	4.51053	5.81247	2.79119	4.59345	3.319	7.73588	4.50536	5.78388	4.14499	3.2984	4.32192	7.13817	7.60457	3.33324	3.48848	5.42085	3.8688	6.04598	2.82322	4.79421	3.0734	5.78785	3.58372	3.80638	3.96553	8.63043	5.22101	5.44551	4.88868	5.80746	7.24504	7.34284	6.26101	6.52377	5.80806	4.78809	5.20632	7.8178	6.26948	3.71057	5.13553	5.82408	7.36811	6.24818
HTA2-neg-47419819_st	7.94354	5.19589	7.32538	6.3718	6.06083	6.54821	6.02554	5.06681	6.16625	4.51048	4.49396	4.06729	6.53458	3.79345	4.44358	6.48622	5.59627	4.82795	8.32461	5.92388	5.63147	4.78705	6.23341	5.48566	5.35855	6.6786	5.40403	6.08917	4.68005	7.21105	4.15428	3.64571	4.49921	4.31415	5.00755	3.99106	5.29574	3.96342	4.04755	4.18089	4.71501	4.83921	3.57208	3.76924	4.76726	2.92939	4.27407	4.25033	4.82222
HTA2-neg-47419820_st	5.6544	3.89134	4.64936	4.44074	3.74761	3.69816	4.07047	3.75242	6.17308	3.01249	3.35976	3.26583	4.13962	2.89119	2.51339	4.28025	5.12318	2.73058	4.83945	2.97864	4.46451	2.3371	4.14353	4.16287	4.67963	4.74107	5.00603	4.20228	4.60631	8.52319	7.56002	5.39405	4.506	4.16694	4.07859	5.06616	4.51332	4.44748	3.81738	4.34751	4.08559	4.54134	4.18193	4.12242	3.03833	3.0176	2.90791	2.71266	3.82477
HTA2-neg-47419821_st	6.17004	7.98917	2.61273	9.41607	2.62813	3.16299	7.91312	7.42142	5.06671	5.20329	7.01667	7.16223	3.61416	8.34451	4.97874	3.47659	3.89698	2.94143	9.75653	5.89772	3.37269	4.53411	3.81887	8.7428	5.576	3.73585	2.64117	2.91488	3.30802	9.34377	4.92634	2.65773	3.40322	4.75432	2.92904	3.26494	4.06546	3.60203	5.32922	3.6049	3.27563	6.73128	4.37913	4.48733	3.57744	2.85541	4.89738	4.20739	3.74445
HTA2-neg-47419822_st	9.40073	7.66656	6.62083	6.1473	6.36407	6.6717	7.17493	5.15891	8.46313	6.62568	4.76358	7.28005	6.4252	6.07356	4.37639	6.62004	4.931	4.70351	8.0703	8.4848	6.84035	6.08687	6.23705	4.3672	6.19908	5.9515	5.30854	6.67221	5.27508	7.696	6.08749	4.97894	8.16663	3.99808	4.4684	4.60768	3.86267	3.29305	3.58623	4.16782	3.53681	6.4562	5.56719	3.38092	2.9193	3.80381	5.92968	6.49592	4.46128
HTA2-neg-47419825_st	4.07022	4.70547	4.15253	4.84094	3.20252	3.77082	3.98141	4.06473	5.18326	3.4163	4.06308	4.84585	4.19561	3.81655	3.34124	3.77727	3.92114	3.48646	4.64409	5.27868	3.54411	2.75619	4.80474	4.59358	4.50009	4.92942	3.2446	5.01863	4.88674	3.20955	3.67845	3.39865	2.52194	3.22787	3.42612	3.919	3.54604	3.03657	2.9837	3.25333	3.05521	3.75136	3.77223	3.60538	3.28889	3.08039	3.88703	4.23827	3.33861
HTA2-neg-47419826_st	6.00006	5.06154	4.19094	5.44624	4.37081	3.73602	5.35249	5.17339	4.17066	3.54131	3.07131	4.47325	5.33683	5.03198	3.96899	4.86473	7.78618	4.77494	3.94704	5.72142	7.82131	6.996	6.1748	2.51627	5.32305	5.68103	3.04072	4.364	7.3071	4.16724	4.79103	7.53469	6.06596	5.3248	5.88188	4.274	5.87929	4.69755	6.30063	5.96262	6.10905	6.55367	5.87961	5.86778	2.76544	8.24831	6.40848	5.62636	3.36981
HTA2-neg-47419827_st	6.82256	6.2026	4.65813	5.65228	5.62884	6.50268	5.63363	5.06772	5.23769	6.38354	9.14726	7.30282	6.71095	4.22015	6.59729	5.29276	6.39838	3.99638	5.77117	8.01	7.18442	6.16482	5.99381	4.09117	6.32257	5.27627	5.66393	6.72341	6.96177	6.6358	6.89107	6.96904	5.38383	4.51679	6.54206	6.23187	8.14869	5.93494	7.0918	6.5407	5.49502	7.52303	8.23982	7.23242	4.73234	7.38846	8.62992	7.22036	8.87926
HTA2-neg-47419829_st	5.45928	4.25779	4.5583	5.14867	3.68445	5.18454	3.58813	3.85851	3.26482	3.65589	4.68226	3.88435	4.48558	2.88323	3.53105	4.61195	2.65974	4.39359	6.7145	6.68978	6.66527	3.83769	6.54432	5.63438	5.9425	6.24902	4.22483	6.95263	5.37631	6.32126	5.07993	4.70881	4.73791	4.41583	3.92919	6.35302	5.0512	4.06157	5.46947	4.81102	4.37093	3.97996	3.51876	3.47476	4.4064	4.15418	7.80493	6.87174	3.56493
HTA2-neg-47419832_st	5.70574	4.87539	4.37208	5.16918	2.78819	5.49944	5.51952	2.88287	5.71932	4.11609	4.45179	4.83911	6.38069	5.22187	3.51535	4.90304	3.93331	5.09775	5.63014	7.64551	4.98642	3.4227	5.35563	5.93818	4.53182	6.38851	5.27656	5.88667	6.1821	5.26373	5.29581	4.8782	4.67087	3.90235	4.98604	4.45395	5.08654	5.46163	3.64721	5.00754	3.30486	4.14844	4.75415	4.56759	5.4223	3.90746	5.57305	5.30177	4.39959
HTA2-neg-47419834_st	5.24614	4.69562	4.25813	4.69931	3.84653	5.69449	2.88421	4.7509	4.17357	3.87725	4.44411	5.1211	4.75027	3.2612	4.04855	4.33288	4.58573	3.86173	4.61714	7.39114	3.67274	3.99079	4.16388	3.65755	4.07202	4.86158	3.97732	4.64377	4.04022	4.79794	4.92983	4.30497	7.58195	3.64928	5.92444	3.61838	4.72249	4.31125	4.05067	6.78711	4.85111	5.75818	5.70224	4.63001	5.37187	4.98732	4.10532	5.38541	6.52703
HTA2-neg-47419835_st	3.93611	4.25395	3.56324	4.66613	3.43141	3.04771	2.97426	3.24238	3.64521	3.68486	3.41044	3.43877	3.27569	2.76153	3.0741	3.31885	3.38497	4.50435	3.33877	3.36113	3.32163	3.63533	3.7862	4.15404	2.97414	4.65918	3.06089	3.39727	4.05545	3.41204	5.02503	3.82661	3.47118	3.75343	4.54216	3.38235	3.79869	4.06506	3.33556	3.31862	3.59858	2.50162	4.60146	3.8229	2.9467	4.65558	4.14984	4.53275	4.87748
HTA2-neg-47419841_st	6.14213	4.58757	4.44561	3.78704	3.52857	3.43782	3.92584	3.27537	4.13533	2.87744	3.59912	3.20349	2.98025	3.51665	4.11343	4.59545	5.05079	3.32677	4.76402	5.55021	5.44344	4.04481	5.71774	4.87205	5.69656	4.28588	4.7794	3.54985	4.28164	3.19609	3.20303	4.35282	3.43919	4.65496	4.64625	3.54216	2.97253	2.68158	3.8035	2.76748	3.39641	3.05434	2.82454	2.60954	3.18642	2.3143	4.79271	2.99442	4.50587
HTA2-neg-47419842_st	5.08874	4.07874	3.56221	2.81128	3.90285	4.49147	3.52525	3.23086	4.38305	2.51905	3.04826	4.55444	4.05929	3.43494	2.7131	3.86457	3.18631	3.49565	3.2514	3.52715	3.11617	4.52671	2.58518	3.8479	3.0882	4.61887	3.56678	4.74572	5.89198	3.3144	4.26106	4.51962	4.82104	4.44559	5.62204	4.07111	6.08546	3.06085	2.91387	4.2518	2.2411	3.89598	3.85897	2.98303	4.22535	4.03573	3.94913	4.98988	2.39012
HTA2-neg-47419844_st	4.66993	4.3202	2.35915	3.9455	2.89709	2.70853	7.12196	2.92329	4.59855	3.49194	5.38897	5.17704	4.22049	6.04183	4.04399	3.74464	4.8997	3.07747	2.97965	4.00047	3.90371	2.46387	5.35251	3.4039	2.76629	4.63371	2.58169	4.59223	3.1309	4.49458	2.25349	3.0853	2.71984	3.82993	3.95385	2.70833	2.93884	4.19756	3.82079	3.23812	4.8405	2.5624	4.41785	4.12232	5.10965	3.93019	4.12232	4.02001	4.21678
HTA2-neg-47419845_st	4.88738	5.80277	7.49042	5.46128	5.47429	7.26355	3.49185	3.61013	8.76811	7.38069	5.65965	6.69598	5.58048	3.98813	5.64194	4.44811	6.18323	3.97979	3.24868	6.84614	5.55901	4.42602	7.08188	5.36364	5.25281	4.09208	5.23671	6.49224	3.98094	5.05194	5.1462	3.38809	3.54509	4.00433	6.11435	5.49574	5.19678	3.8532	7.10842	5.20438	3.76377	4.54776	5.09015	5.2545	4.55184	5.43914	6.5771	4.93967	7.28466
HTA2-neg-47419846_st	4.85482	3.83781	2.64394	5.17411	3.45904	5.18315	6.24721	4.62634	5.84003	4.58254	3.48586	4.64542	6.00712	3.98216	4.6148	3.72397	5.12117	6.37011	6.51087	4.4051	5.95508	3.52823	5.47779	3.55099	7.5934	4.94331	3.78133	5.73407	4.18137	3.32091	3.94581	7.45063	5.67367	3.5572	6.21525	5.12111	4.9183	4.63489	4.65178	4.2918	5.56597	4.6044	4.73892	5.96577	4.48284	3.47744	6.7595	3.92746	5.02915
HTA2-neg-47419848_st	5.07392	6.91052	6.69463	7.38178	5.56403	5.81405	5.48223	7.05041	7.05506	5.73076	6.68505	7.81522	6.33671	4.90379	6.01009	6.53812	6.76165	4.11003	8.70848	5.77614	6.24493	7.74806	4.97701	7.79237	7.69503	6.66744	5.00582	6.56443	6.28995	6.47037	7.37938	5.61057	5.53185	5.60141	6.07281	5.28687	6.45776	6.31107	4.87152	5.04121	6.04295	6.05442	6.22598	6.34634	6.72733	5.71126	6.46768	6.90388	6.69062
HTA2-neg-47419854_st	4.81291	4.14252	6.29318	3.47439	3.98564	4.93701	4.04291	4.19917	6.17694	3.42781	4.75491	3.35758	3.63937	6.15416	4.77921	5.57363	3.29596	4.6012	5.75913	3.86332	4.222	7.35645	5.0909	3.98452	4.28038	6.96948	4.43227	5.64453	4.20825	3.22447	3.91939	2.8012	4.96208	3.53586	3.62109	3.91306	3.01577	4.5652	4.04551	5.33525	3.46467	3.24045	3.76031	4.72752	3.8951	3.42002	3.82832	3.86849	3.36136
HTA2-neg-47419858_st	9.8451	10.3683	11.2054	9.24008	5.49492	9.08274	7.06668	7.78363	10.4128	8.28632	9.72209	9.64221	8.80419	6.62004	8.77349	8.82115	7.39079	7.67396	12.3372	10.7815	7.63127	9.15599	10.2508	9.56412	10.793	6.32804	10.687	7.48597	7.5109	8.16355	7.56082	9.85922	9.04697	4.86049	8.729	5.28496	7.97316	6.78049	6.67837	5.53968	7.87302	5.38015	7.28823	8.92608	6.34411	7.51934	9.16898	9.59992	6.94824
HTA2-neg-47419859_st	5.06902	4.80297	4.11029	4.42366	3.19747	4.61861	4.19206	3.61929	4.68775	3.22884	4.18727	4.63135	3.54292	4.47507	3.82545	4.44435	3.14919	4.36453	4.12905	4.06393	4.5917	4.69432	3.64459	3.67681	3.40519	4.15156	3.14109	5.17902	5.14448	3.68117	4.07942	3.15032	3.93068	4.66955	4.38153	2.95271	3.38668	2.96418	2.51069	4.403	4.45491	4.0928	3.13581	3.47028	3.63987	3.50286	3.1756	3.80009	4.01607
HTA2-neg-47419860_st	5.85796	5.43283	3.63326	4.98195	4.29699	3.55491	5.84616	4.76487	2.97612	4.94038	3.61403	3.91107	5.71845	5.32032	4.40966	3.70263	5.29317	5.04537	7.58215	5.22725	6.65151	4.3938	3.90464	4.75088	4.8964	5.66244	3.41176	4.21318	4.90067	5.20189	5.06092	4.82305	4.96818	3.72839	3.5927	4.268	5.00175	3.35433	5.36647	2.54334	4.77068	3.81479	5.05127	4.04062	4.49057	4.83304	5.95485	4.1756	4.62822
HTA2-neg-47419862_st	5.65156	4.29645	5.69561	5.85942	5.99028	6.11954	4.58068	5.32743	6.02041	3.9605	5.53004	4.2047	3.26304	5.08757	4.3995	6.1148	4.67135	4.94751	6.20004	4.63909	6.16139	4.74391	5.2394	5.93879	5.77905	5.4356	4.81309	4.89452	5.15593	4.99564	5.15961	5.64009	6.72623	5.34564	4.22259	3.94965	5.26699	5.31973	4.60297	4.65566	3.59216	5.9199	4.56433	4.16264	4.99194	4.83312	5.19139	6.28625	5.053
HTA2-neg-47419866_st	4.90008	5.01565	6.57767	2.57707	5.29744	4.55236	5.32716	3.47303	4.51239	3.7446	4.39664	3.58774	4.30554	2.60697	2.11678	6.19844	2.35247	2.82141	6.7022	5.30118	4.222	3.79424	3.04474	2.90142	3.13495	6.11995	2.67587	3.93403	5.25662	2.48926	3.46455	5.57522	2.76952	3.96635	2.96945	3.02804	4.6233	3.75107	2.77691	4.35555	3.24448	3.51064	2.66475	2.03871	2.34925	3.17994	4.30684	3.03485	4.58259
HTA2-neg-47419868_st	4.66511	5.27102	3.90784	4.30352	5.11336	3.43768	3.21118	3.61997	4.68568	5.73548	3.44776	5.4423	5.19877	5.00215	3.77122	3.89071	5.23214	7.34564	4.98207	5.77233	3.8994	4.55687	3.7148	3.61334	4.0779	5.61507	4.94716	6.00921	5.18178	4.45273	8.00716	3.96654	4.72307	4.13245	4.45874	3.5012	3.91838	3.86069	4.49791	4.69342	3.55167	3.77541	4.00435	4.33371	3.33547	5.21255	3.99189	5.49881	4.77479
HTA2-neg-47419870_st	4.08848	3.2701	2.80117	2.54187	2.90788	3.47996	3.46025	2.35578	2.64489	2.33027	2.61315	4.04399	3.03012	2.36215	2.51935	3.45777	2.54188	3.33103	3.27811	2.2846	2.6762	2.5666	3.2563	2.54444	2.91558	4.34874	2.95548	3.25042	3.42781	2.70848	5.18853	2.75417	3.23093	2.41086	2.69303	3.2036	2.26794	2.73066	3.12471	2.42794	2.81395	2.50217	2.35879	2.29224	2.84026	2.48035	2.86737	2.52884	2.90304
HTA2-neg-47419879_st	7.85304	4.7855	3.65365	6.6444	4.37081	6.62303	5.87519	6.44036	7.2176	6.98111	4.14982	5.22804	6.30527	3.18657	5.76532	3.26724	6.0969	4.79826	6.96308	6.66096	3.21632	5.76722	5.7356	5.51175	5.47342	7.46725	4.00228	6.41951	5.52941	4.81691	4.84021	5.82822	6.98513	6.20738	6.25252	6.23187	6.19006	5.84321	5.54576	6.28948	4.89351	2.52944	7.42395	7.23649	5.44662	4.11691	4.59408	5.66509	4.99667
HTA2-neg-47419880_st	5.11956	6.16248	5.8222	5.4817	4.24149	6.02387	5.58385	4.37249	6.27025	6.19483	5.06663	5.56528	5.59807	4.94901	5.80268	6.74467	4.31225	5.1716	7.74306	7.69523	4.46398	6.87505	5.79408	6.34738	6.57497	6.89499	6.14825	5.96639	4.83437	4.89028	4.38089	4.99037	4.94627	5.1372	3.67691	3.87395	7.23681	5.74655	3.25222	3.91342	3.37538	4.86748	5.1522	5.1845	4.90962	4.793	5.91591	4.87893	7.91795
HTA2-neg-47419881_st	7.92741	5.87967	7.50929	6.83721	5.10581	3.60757	7.07272	6.30171	5.69229	6.15143	4.2086	6.51326	4.06815	5.83045	7.12679	4.54939	6.72046	4.81999	4.34475	5.88568	9.7779	4.74301	4.75423	6.82654	5.53359	6.38962	6.98721	6.42649	4.82837	4.5915	6.35226	4.72823	5.05252	5.31508	4.64125	5.03833	5.86641	7.13779	7.09681	6.21184	5.73802	6.88834	5.60165	4.19156	6.8844	6.57163	5.07407	5.99387	6.41513
HTA2-neg-47419882_st	4.59111	3.20015	4.44953	6.1466	4.91757	5.00713	4.0668	4.21454	6.02409	2.98693	3.834	3.95074	3.41077	3.43207	3.97886	3.11457	2.93445	3.65395	4.20489	3.99566	3.85025	5.52052	5.57042	2.98576	4.25135	2.79348	4.83882	3.52455	2.79261	3.71912	5.18292	6.11221	5.16125	4.09624	4.78686	4.63561	3.05697	3.27482	3.9933	4.71772	3.54154	4.82621	4.15836	3.39223	4.77277	4.99031	2.5547	3.10154	5.83478
HTA2-neg-47419883_st	5.36369	4.59851	4.17712	3.50111	3.92999	4.23902	3.74276	3.6613	4.34703	4.5601	4.19359	4.67242	3.63886	4.44412	3.28886	4.01091	4.33234	3.49684	4.66437	5.08862	3.67491	4.82629	4.86977	5.10687	3.84619	4.4576	3.93456	4.22742	3.72013	4.52674	3.14975	4.32684	4.01948	3.60975	3.81992	3.35744	4.96992	4.18716	2.62693	4.36852	3.63973	4.02643	3.66844	4.34331	2.69736	3.65726	4.41285	3.59527	5.51166
HTA2-neg-47419884_st	5.8027	5.74681	6.45089	4.52592	3.57895	4.18314	3.65774	4.17521	5.78832	5.05065	3.90529	3.92516	3.18883	3.83459	5.1316	4.59634	4.32669	5.04443	5.10356	4.69836	5.4214	4.71372	4.65727	4.70476	3.96028	6.31661	5.43069	4.27557	5.27289	5.33184	5.37085	3.42414	3.71486	4.90502	4.77185	3.80856	3.48248	4.90011	2.99127	3.62619	4.01846	4.19511	3.95574	5.59581	3.85841	6.29982	4.94169	4.16496	4.35024
HTA2-neg-47419889_st	5.47365	4.92599	8.63436	5.60857	6.05013	4.66082	12.0446	7.57024	6.5076	9.55989	4.54986	6.979	5.00916	9.86009	6.46336	3.74464	4.549	2.85956	4.09477	7.29896	8.61497	5.52203	6.65082	5.35431	7.47797	4.22721	7.41548	4.37653	7.83806	5.0531	8.30371	7.42392	5.11184	11.2168	7.1825	8.24882	8.25222	5.23948	5.5894	5.59136	5.63996	5.17164	6.43657	7.6643	7.41093	7.3605	6.82945	6.59188	4.24427
HTA2-neg-47419894_st	3.79226	2.99689	4.5242	3.44947	2.59125	4.09228	3.75992	4.71263	4.63565	3.00966	3.408	4.82759	2.17918	2.71778	2.39069	4.74163	2.19137	3.57702	3.14972	4.12605	2.9427	3.59293	3.15115	2.67126	2.42848	2.48529	2.8911	3.12133	2.7188	3.71236	4.12232	4.7894	4.56968	2.25375	3.63855	4.21531	2.64438	2.35008	3.14066	3.47181	2.66111	3.80041	3.58472	3.52838	3.28848	3.9516	3.52838	3.68826	4.12297
HTA2-neg-47419896_st	7.00294	3.65765	5.11942	4.12466	4.87811	6.1308	4.75347	6.19236	5.43686	4.06958	4.70247	5.87737	4.71175	4.34869	3.97164	4.86328	7.84926	4.04159	7.53165	5.21392	4.26707	5.01013	5.26348	5.60999	5.12973	5.01814	4.82794	4.14328	5.0653	3.56057	6.90318	4.55408	3.49619	4.22727	3.76582	4.17402	4.88707	5.2438	4.86504	3.07892	5.25678	4.4361	4.33551	4.47743	4.70594	4.832	6.30982	5.23772	6.71111
HTA2-neg-47419898_st	4.91402	3.56084	3.71569	3.07066	3.26806	4.28151	2.85729	3.29191	3.5457	2.87586	2.86942	3.57	3.00404	3.72135	2.5589	5.07053	3.13737	4.28738	4.64033	3.82834	4.15843	4.42963	4.30366	3.4399	4.77434	4.45829	2.89392	4.39894	4.38574	3.41802	3.69741	2.57289	2.74639	3.72107	4.32794	4.6009	3.38775	3.77709	3.42844	3.22426	4.57975	2.9616	3.86355	2.73372	3.10572	2.7595	3.88858	3.37408	5.3403
HTA2-neg-47419903_st	5.13427	5.27713	4.80648	4.97435	4.20584	6.13718	4.36545	4.1646	6.10819	7.32278	4.93978	5.07025	6.65351	4.2638	3.70419	5.4967	4.23534	4.36765	5.04422	8.47247	5.48594	5.81657	7.54765	3.7026	5.66893	4.95785	4.72425	4.74761	6.22563	4.18457	5.75481	4.13644	6.54619	3.69166	4.24655	2.52431	4.13779	3.41384	3.88572	4.02237	2.49906	3.50112	4.81259	4.62686	3.09448	3.03772	4.24582	5.27786	6.19114
HTA2-neg-47419910_st	6.22341	6.7339	5.13639	5.15118	5.40209	4.43853	5.35908	4.39255	4.85534	3.29217	3.794	3.42129	4.36415	4.77481	4.76462	5.64135	4.14698	4.98049	8.21754	6.00367	5.08772	2.54864	4.49598	3.59321	6.19419	3.93045	5.14164	5.11123	7.0032	3.69148	3.64829	4.3096	6.67649	5.55199	4.54415	3.22155	5.25049	4.85835	6.39945	5.85131	2.16426	4.72433	3.72417	5.08502	4.62598	2.89258	4.44493	7.78786	4.42153
HTA2-neg-47419912_st	6.49904	3.63149	4.5242	7.33623	6.5653	3.91638	5.10978	4.45036	4.57747	4.30772	4.35856	4.41999	3.79074	3.45808	3.56081	6.34801	4.95514	5.47221	4.65858	2.45411	10.8217	3.77115	8.06852	4.44039	4.14449	7.14705	2.95796	2.92244	3.20159	3.32102	3.91939	2.53886	3.77194	2.69079	4.76915	5.02388	4.97703	4.33796	3.0361	4.76337	2.53216	3.93991	3.684	3.28244	3.11019	3.15205	3.60831	3.12695	4.18965
HTA2-neg-47419916_st	3.90963	2.71171	4.22611	4.3591	3.80709	3.83117	4.41984	3.40047	4.41549	4.91242	4.7554	4.49733	4.68905	4.75589	3.98541	5.4278	4.29709	4.74044	3.47294	6.23613	4.67206	5.16511	4.73222	4.81267	5.6442	5.2973	4.7371	4.36936	3.3749	5.4149	4.14664	4.80498	4.31838	4.44155	3.18999	2.51254	3.44094	3.39667	3.31033	4.30915	4.14467	3.29625	2.79639	3.26357	4.68422	2.96205	2.96308	3.49587	3.46192
HTA2-neg-47419968_st	4.0499	4.97328	2.87647	6.62254	4.82438	6.0326	2.664	4.53808	7.02474	5.38013	3.35349	6.21531	4.45144	3.92508	2.87466	5.35545	3.60932	4.35753	6.42472	6.17002	3.64161	4.72276	6.49129	5.85853	3.44374	6.94188	5.21113	5.55836	7.09202	4.81358	6.01105	5.47885	4.21383	6.37129	5.45312	5.93595	4.95716	6.75057	4.80314	6.21614	6.26621	4.3819	5.35611	4.77495	5.02303	3.80895	5.65538	5.58873	5.85541
HTA2-neg-47419974_st	4.13519	3.77047	3.98109	3.90185	3.97263	4.06937	4.2185	3.06771	3.66594	3.01678	3.52624	3.84975	3.18718	3.13555	3.68878	4.46109	4.20539	4.24936	4.24073	3.612	4.08547	3.4718	3.76087	5.01841	3.45053	3.42183	3.40173	3.74907	3.5199	3.10441	5.01396	2.75008	3.24588	2.52433	3.07532	2.56685	3.16508	3.29555	2.78483	2.26339	2.84133	3.40819	2.7424	2.19684	3.48267	3.00322	2.81519	2.83922	4.54791
HTA2-neg-47419976_st	7.72251	4.82004	5.70414	3.30165	3.0248	4.39151	4.48308	4.32532	5.5744	2.18842	4.84006	6.7468	6.39145	3.40537	5.46662	4.35087	2.69537	2.28145	5.54017	4.24611	4.17358	6.0001	4.47447	3.28864	3.58831	2.96103	2.55159	4.69798	9.65181	3.11726	7.9425	4.82408	7.30467	9.47161	3.26717	5.86539	4.78943	5.15572	3.34176	3.69938	3.65752	3.17853	5.53025	3.12488	8.60029	4.04126	4.0742	4.85941	4.2655
HTA2-neg-47419991_st	7.86898	3.2701	4.5242	3.44947	4.76043	4.37653	2.27438	3.46395	5.72152	2.53218	4.27527	4.04399	5.01299	3.40639	4.04399	4.74163	4.58338	2.85956	6.0844	9.26308	3.89625	5.01793	2.66774	6.04015	3.79493	6.51272	4.04157	2.51935	2.4801	4.80673	2.25349	5.65401	4.76773	3.2718	3.95385	4.17793	3.77295	2.28211	5.33526	4.15866	3.63221	6.375	4.04136	4.37274	2.34925	2.90048	6.54252	5.1513	4.94864
HTA2-neg-47420010_st	3.63591	4.71538	3.97586	3.65393	3.85505	4.25887	5.54191	3.6118	4.95016	4.36977	4.20559	4.48926	4.58006	3.75464	4.2703	3.95549	4.50044	4.41386	3.65969	3.52101	4.75613	3.9855	3.55244	4.36747	4.65774	4.5609	4.27703	3.44678	3.92859	3.16848	5.75616	2.70968	4.62519	2.58634	3.54057	3.52131	4.91901	3.08971	2.8297	3.86538	3.56147	3.5279	3.44528	2.58218	4.89553	2.96192	3.33367	4.19731	3.3164
HTA2-neg-47420032_st	3.48642	3.39276	3.89039	7.23066	3.22351	6.80413	3.18311	5.68988	5.24993	2.91223	4.68319	3.23006	3.91062	4.86071	6.72573	5.59432	6.25932	3.35983	7.81229	3.20535	3.00761	4.48366	7.32959	4.91137	5.85106	6.37634	3.92303	6.03383	4.93454	3.97235	5.08926	5.81251	3.24247	4.12421	5.96269	5.75859	5.01489	6.48731	3.62217	5.54088	5.55276	8.05368	4.09484	5.22336	5.29823	5.40662	3.32097	3.82415	4.62016
HTA2-neg-47420068_st	5.83445	7.10777	6.53781	6.08875	5.30089	3.45873	5.49061	6.29006	4.69926	4.7307	6.96315	6.08594	3.98345	5.11032	4.97704	5.08355	4.08048	4.62651	4.39045	5.14698	5.91206	5.02495	4.08655	4.78974	5.12449	5.65613	4.76743	4.97499	4.93092	4.81562	6.97418	5.9081	6.61134	5.68961	4.37234	4.21097	2.80844	7.00071	4.6513	5.59576	6.02296	5.58158	4.96207	3.44072	5.05297	5.30763	3.33944	4.96941	5.74899
HTA2-neg-47420075_st	6.90373	5.67008	8.40004	5.6875	7.82564	5.54123	3.8784	6.81275	3.50939	3.2717	3.63212	6.53871	8.50668	3.5625	6.28993	2.94035	6.52074	5.1109	11.3048	7.06433	5.1353	6.7193	4.98462	7.01453	5.43798	6.58727	8.9016	3.13787	4.75383	8.17952	7.39482	6.10266	12.2629	5.74918	3.04921	2.82105	6.64669	7.88213	9.47874	6.75782	5.19786	2.97074	4.23659	6.9518	11.0921	2.84555	5.34911	2.66189	2.85644
HTA2-neg-47420081_st	4.0777	4.432	5.88367	7.17262	4.80487	4.61594	5.2136	5.53681	7.04506	5.43776	4.77865	5.15586	3.21967	4.45447	6.42015	8.26114	4.52688	7.45565	5.2285	4.82108	4.83988	2.57919	3.95133	5.14486	4.0918	5.63042	5.46669	5.17711	3.32506	4.9824	6.13075	5.50245	5.88972	6.2445	5.10734	6.68771	5.74008	5.49188	4.91769	5.77184	4.53759	3.62297	5.48572	7.11509	3.80983	4.76279	4.22221	3.80265	5.23657
HTA2-neg-47420087_st	3.38082	2.61826	4.38481	3.81053	3.73731	3.63907	7.77527	3.24354	5.46513	2.84594	4.77363	2.59276	4.06358	2.70357	4.02793	4.94736	3.12595	7.33273	3.35438	4.79918	2.88289	3.90656	3.58661	3.54316	3.92176	4.32155	2.67339	2.83046	8.63915	6.30423	8.04753	5.27745	3.34261	3.51184	3.84665	4.23828	4.05117	3.29871	2.86009	4.46273	3.78773	5.10318	4.42146	4.97637	3.95965	3.82393	5.09219	4.10793	9.34904
HTA2-neg-47420088_st	5.97766	3.91361	3.6407	3.49732	4.29942	5.27817	3.58085	3.27116	3.54708	3.83283	3.92826	5.10623	4.95196	3.50413	4.02406	3.91481	3.43047	3.32143	6.10249	5.04961	4.29937	4.12503	4.82006	5.06809	4.17809	4.61591	5.07426	4.46042	6.22362	3.43637	4.81097	5.24853	4.05567	4.81879	4.84564	3.92313	4.77229	3.87025	3.61466	4.06212	4.08833	4.7792	4.23248	3.667	3.90126	4.26485	3.88978	3.74293	4.52071
HTA2-neg-47420091_st	9.44551	3.79515	5.35729	4.69617	4.55681	3.20418	4.49111	5.37466	3.40437	4.35267	3.4562	4.34784	3.95438	3.92234	3.68156	4.36535	5.36657	3.80352	4.57838	5.701	4.54971	3.48121	4.94989	4.34494	2.68283	4.36756	4.44195	4.3973	4.02323	5.31608	6.40929	4.51242	4.50952	4.75099	4.37595	3.8429	4.49189	2.80822	5.04483	5.00281	4.18925	3.96236	6.3192	3.91961	3.19973	3.45468	5.2664	2.96172	5.00927
HTA2-neg-47420110_st	3.84893	2.96931	4.34981	3.86508	2.89538	3.34953	3.44553	3.00323	3.47425	3.69377	3.51647	4.14717	2.53233	4.38082	4.04399	4.40127	3.36643	3.68774	5.51756	3.61504	3.65516	4.63551	3.97897	5.07559	3.19286	3.74464	3.82101	3.29311	4.33588	2.81847	3.81484	3.7346	3.57552	2.73714	3.05393	3.4549	2.6555	3.678	3.64115	2.9445	2.77547	2.359	2.57483	2.4565	2.53406	2.76157	3.81079	2.28745	3.14952
HTA2-neg-47420152_st	9.87927	11.2807	11.4925	10.4022	8.41543	9.46114	9.55613	8.06655	9.67061	9.82629	8.88314	11.14	10.4321	7.3348	9.76316	9.67386	12.0921	8.68988	13.0109	10.248	10.2876	10.1967	9.62546	9.40078	11.1492	10.1315	9.43319	9.93678	10.3917	11.4059	14.5577	13.3063	15.3667	12.1492	14.2722	10.8388	15.0279	12.8708	13.8873	13.2904	10.937	13.106	12.6785	11.647	13.403	12.276	14.2194	14.4279	15.7897
HTA2-neg-47420169_st	7.99097	8.52968	9.70052	8.19081	8.50862	5.66483	6.97709	6.49717	10.8124	7.99135	6.13056	8.47341	9.81131	7.4168	9.05892	7.15613	10.2061	9.17464	9.04783	11.6428	9.32091	8.15799	8.89436	6.60219	8.91837	9.19458	9.10532	6.1898	7.31457	8.08825	8.14674	5.85414	7.90117	7.76493	7.47226	5.57427	8.23035	5.52201	6.44555	8.84805	6.07925	5.65463	7.34035	5.95317	6.41787	7.49018	7.71556	7.52083	7.99576
HTA2-neg-47420173_st	6.67809	6.76558	6.24461	8.56471	6.85694	5.32478	4.94056	5.36742	7.11913	6.4839	5.25496	6.86969	6.11721	5.86889	5.3382	5.55909	5.82007	4.30184	6.60116	6.37644	5.25577	4.90609	8.41071	5.77046	5.20948	4.22555	6.40965	6.25264	7.53107	4.45042	6.62611	6.13147	4.06184	6.55485	4.01846	5.64156	3.00016	4.33602	3.88572	4.90724	4.54161	5.14171	3.49345	6.64724	6.35579	4.58087	2.97447	3.44547	4.53581
HTA2-neg-47420176_st	7.10926	7.69995	6.22389	5.87684	5.52552	5.74913	6.15007	4.1764	6.06583	4.98522	5.98931	6.63337	5.76044	4.31717	4.52128	6.48871	5.88234	6.28759	6.75612	6.50214	5.01933	4.06503	5.90319	4.53186	5.21781	5.47877	5.17885	5.31794	3.74867	5.23886	6.08777	6.57489	7.4013	5.12683	4.04479	3.64931	5.33898	3.72579	4.16267	3.86534	4.94576	4.64557	4.57418	6.37289	3.46757	3.81477	3.44995	3.40288	5.00548
HTA2-neg-47420177_st	6.60955	7.01691	7.02552	3.868	6.21264	5.80569	4.95051	4.11125	6.90371	3.69532	5.1979	6.32509	5.78055	3.84651	5.72239	4.83164	5.65502	4.40043	7.51402	7.12598	6.3732	5.98633	6.72035	5.75337	5.64833	6.2962	5.72781	6.02044	5.49969	6.38076	6.5286	3.82971	6.8289	5.74918	5.27991	4.22977	6.39261	4.78714	5.53784	5.02388	4.68764	5.79104	4.37549	3.74868	6.60904	4.5663	5.72025	4.69757	7.82611
HTA2-neg-47420194_st	6.29294	4.98914	6.39131	3.87645	3.48243	7.14798	4.65513	4.50669	4.94171	5.58693	6.72835	5.08338	4.42867	3.71823	8.66171	6.02164	8.98073	7.25793	5.22017	5.92217	6.05363	4.87361	5.20159	5.44479	4.6564	4.81629	4.45849	8.33535	15.2284	9.28137	9.18293	8.25572	7.89254	7.16371	7.30177	6.45668	6.98184	5.29815	3.97635	6.70236	6.89395	5.71483	7.10045	5.04794	7.37514	5.38015	7.04507	3.71826	7.0222
HTA2-neg-47420204_st	5.14517	6.26521	3.20572	4.89883	6.83867	4.15266	4.01974	3.89935	3.19399	2.98402	5.14004	2.16256	3.79412	5.32719	4.26372	2.75005	3.21496	2.69511	5.41729	7.31086	3.17709	3.91997	2.7636	4.57842	3.79995	3.84246	2.66456	5.37818	4.45208	3.51043	3.54806	4.3414	3.06415	4.4718	2.74488	4.14812	4.9984	3.86535	3.61345	2.67363	4.0603	3.61659	3.12328	3.3361	4.50424	3.4687	2.32155	3.25838	4.516
HTA2-neg-47420232_st	3.82747	2.69083	3.57513	4.92339	3.66759	4.99784	5.23464	3.87325	5.72439	4.02257	3.44586	4.30567	3.76683	4.03342	3.45441	4.74163	6.39838	4.36001	5.41905	6.68354	5.13853	3.22902	5.26872	5.03871	3.44552	7.13159	7.27277	4.3056	3.49449	5.37942	6.50965	3.885	7.18629	5.27792	4.14102	3.88967	3.71593	4.48808	5.56514	5.7387	4.39644	5.73113	7.72825	4.75589	5.67475	6.52302	5.03742	6.85383	3.58888
HTA2-neg-47420234_st	5.31081	5.55675	4.58985	3.86821	5.09433	3.5054	6.73943	3.70063	3.59759	3.79547	4.99125	4.67705	5.2625	2.23864	5.14262	4.45058	7.72464	5.23991	5.84054	5.3848	4.62923	6.68964	5.58029	4.99604	3.66681	5.93656	8.93442	5.46272	4.82391	5.85975	5.29986	3.33729	5.46811	4.80775	2.62826	4.23998	3.32031	3.62088	2.78421	3.65554	4.24022	3.05103	5.16684	5.83611	4.91214	2.91736	3.24813	4.0083	6.39566
HTA2-neg-47420247_st	11.7451	3.64165	6.61065	5.40405	7.99191	3.36926	2.51972	6.49717	2.01195	4.32745	5.63112	2.54417	5.2625	10.0528	5.48639	5.0811	2.86104	3.95851	4.09477	2.08773	10.5511	5.01793	3.2563	6.39075	6.11678	4.33475	10.6036	2.83799	4.57308	5.24865	5.16128	2.80873	7.47972	2.79616	2.5805	4.36704	6.51489	6.02697	3.34176	2.31185	3.44113	6.01952	2.1402	3.40146	5.86528	6.0335	4.54402	2.64827	4.94864
HTA2-neg-47420326_st	5.72299	3.84024	3.16058	2.55126	3.89344	3.76944	3.10975	3.29551	5.29127	3.15389	3.46596	3.16675	3.85836	2.8572	2.48975	2.37383	2.77099	3.87558	3.22387	3.51694	3.41212	2.62664	3.61592	3.8215	3.55512	3.4448	3.53796	2.50922	4.58952	2.99935	3.41494	3.73352	2.9405	4.26091	3.27443	3.56164	4.56963	3.08261	2.99172	3.19056	2.44301	4.17439	4.06571	3.45912	3.97765	3.73771	2.40373	3.49575	3.90025
HTA2-neg-47420332_st	10.8729	3.36426	2.55236	2.97876	5.13201	4.20576	3.33042	3.48568	3.16067	3.49538	3.56236	3.00593	3.57119	3.07815	2.65587	2.30831	3.49315	4.74018	6.06859	4.0244	3.52827	4.37909	5.6054	4.06872	3.00876	3.07017	4.69522	3.72463	12.9806	4.93574	2.93829	4.34737	2.73486	3.467	3.43085	3.66501	2.56059	2.9896	3.29607	4.58833	3.73167	3.56769	2.98013	2.85392	2.92852	3.11838	3.47992	3.95473	3.57088
HTA2-neg-47420333_st	2.83295	3.04428	3.87689	3.44495	4.07777	3.15652	3.58906	3.72738	3.67071	3.56079	3.37002	3.15672	3.18676	3.36558	3.30628	3.38187	3.85574	3.08991	5.54059	3.51705	3.89912	4.13156	3.45273	4.19882	3.79414	4.19344	3.75594	4.17236	3.41127	4.21883	3.7855	3.93269	3.62469	3.01591	3.46521	3.6347	3.84598	3.24453	3.56071	4.02614	2.97353	2.95474	3.54949	3.9461	3.78561	4.19531	3.31195	2.9931	6.16231
HTA2-neg-47420345_st	5.52322	6.0227	6.59284	5.93684	6.21452	5.60505	6.07104	5.6664	5.88605	6.50796	5.38725	5.89678	6.02136	5.45335	5.14034	6.63787	5.91438	5.52297	7.17899	7.83322	5.78731	5.12468	6.65654	6.42806	6.99179	6.8114	5.19449	5.64883	5.88328	5.69337	3.70718	4.2711	4.76137	4.33247	4.48834	4.15623	6.83617	3.65809	4.28092	5.3193	3.81406	5.3831	4.68858	5.3399	3.83908	3.42309	4.01503	4.72138	5.80544
HTA2-neg-47420354_st	5.49222	3.29145	4.40118	3.94659	4.64969	4.85057	4.07192	4.1923	6.08943	3.41189	3.12795	3.42522	3.56678	3.10664	3.47774	4.01287	3.65711	4.1184	5.66667	5.23877	4.56932	4.29852	3.79336	3.73022	3.94003	5.04607	4.25222	4.20776	4.37244	5.91546	4.75924	6.33476	3.79572	4.44036	4.41458	3.7597	4.59429	4.05625	3.73418	3.96727	3.49847	2.6771	4.57157	4.41583	3.35448	2.51532	3.31568	3.29401	4.59644
HTA2-neg-47420356_st	5.06766	4.7147	4.37872	5.80343	7.3237	4.43833	5.59128	4.90827	7.35304	4.83186	4.35974	4.06069	5.45133	4.15091	3.61695	4.99259	6.03095	4.4156	4.69343	3.37288	4.20583	3.68364	4.66685	5.02782	5.06772	5.64406	5.97737	5.20665	4.72877	4.25225	3.98944	3.97655	4.61602	4.2157	4.68133	4.10815	5.23686	3.72023	4.07813	4.79129	3.78088	2.5493	4.63799	4.19223	2.65844	2.66248	4.80755	3.30563	3.71433
HTA2-neg-47420383_st	2.5129	2.82098	3.1872	3.7477	2.6099	2.62597	2.74953	2.50132	2.38055	3.01456	2.18041	3.10418	2.60734	3.19355	2.81221	2.35515	3.27678	2.66542	3.76667	3.15005	3.0368	2.9299	2.85436	2.89687	3.06977	2.74465	2.67493	2.15158	3.11438	2.47677	3.11131	2.80873	4.20008	2.54193	2.4277	2.60905	3.76895	2.83078	2.97131	3.49898	2.86732	3.53121	3.05575	2.36855	2.75972	3.3913	2.76214	3.12033	2.40203
HTA2-neg-47420405_st	5.39618	4.39546	5.21269	3.78142	4.20071	4.19796	4.20363	4.04181	3.58238	3.92045	3.17642	4.48189	3.71345	3.71512	3.20362	3.39078	3.63091	3.59596	5.1587	5.25124	3.89994	4.17945	4.07105	3.81102	4.83365	4.35025	4.82444	3.55135	3.44253	4.44221	3.7515	2.77633	3.73425	4.15931	4.13956	2.81998	3.93116	3.76046	3.86366	5.09913	4.89222	3.68555	3.64531	4.67772	4.9344	4.54829	4.45075	4.24628	4.14856
HTA2-neg-47420411_st	5.46895	3.97451	3.93461	4.76154	5.75283	5.26681	6.66366	5.89285	4.11051	3.5859	4.58111	5.5229	5.08254	4.38343	4.09912	5.03781	5.12576	5.51657	4.42567	6.41087	5.40531	4.50145	5.10495	4.01613	4.43589	4.6881	5.01647	3.64231	6.40386	4.59188	4.86424	3.87159	3.91636	4.12748	3.93291	3.66408	4.34762	4.17054	4.24283	3.7644	3.05082	5.06323	4.32402	3.25698	4.21651	4.78824	4.40349	4.85794	6.24436
HTA2-neg-47420419_st	4.91895	3.91233	4.00453	3.44739	3.9735	3.59412	3.60112	3.91988	5.52717	3.50918	3.64809	3.34465	3.83227	3.25813	3.31808	4.77058	3.73588	3.53516	5.56336	4.98994	3.55099	3.13125	3.57008	4.02209	2.93627	4.48415	4.57672	3.46541	4.96026	4.07118	4.14545	4.51002	3.33593	2.8702	2.98331	4.03548	2.93691	3.19719	3.80211	4.59475	4.08103	5.01191	5.56407	2.5745	3.49133	3.9148	3.18357	3.37601	5.14622
HTA2-neg-47420423_st	5.33574	4.9721	5.65413	4.53599	4.29699	5.0533	4.16729	4.73937	5.13626	4.83186	4.60917	5.34148	5.92975	3.96521	4.459	5.13481	4.83755	4.21392	6.04565	5.94749	4.91575	5.34353	5.29912	5.1723	5.2958	5.57865	4.65359	6.33517	4.80987	4.46819	5.54025	4.01284	6.20106	3.89537	3.86163	4.39841	5.74596	4.39092	4.3129	4.35555	4.5889	3.53121	3.42405	3.07928	4.02675	5.07749	4.84177	4.32675	4.55206
HTA2-neg-47420444_st	6.30578	3.63088	7.42414	3.92112	5.53761	5.48592	6.03661	6.42659	6.64309	4.11089	6.5036	6.94934	3.2696	5.3145	5.10292	4.58346	4.35405	4.47306	8.67009	6.37561	6.3398	3.69857	3.49968	2.12906	4.85696	4.41648	7.31013	4.94967	6.48075	6.37447	4.25637	5.70281	4.40174	5.23921	5.02065	4.05043	3.48516	4.5404	6.7029	4.50575	4.27008	5.38533	3.91846	6.66772	5.17889	4.6105	6.16919	5.05424	6.07677
HTA2-neg-47420476_st	6.07861	3.49669	2.69345	2.94583	3.66759	3.21905	3.74449	2.79178	4.58909	4.01099	3.16152	3.97008	3.06077	2.35136	2.73065	8.63885	3.26692	3.20211	4.17936	3.7465	2.9665	4.14825	3.14858	2.60678	5.00979	4.19515	2.50806	5.17704	3.21181	2.68296	3.22869	3.06856	5.09149	3.15741	2.9049	3.99617	3.62247	3.5844	2.92346	3.1958	3.4596	2.70386	2.74101	4.03708	4.11467	3.10604	3.47999	3.66139	3.49681
HTA2-neg-47420490_st	3.49504	3.64075	3.52678	3.77859	3.64767	3.98949	4.15874	4.01352	6.05055	4.75758	3.69984	3.94743	4.91924	3.25567	4.26438	3.37511	3.91276	2.93374	4.08135	5.42873	3.43069	2.9957	5.66513	3.2047	4.73257	3.69288	3.29432	3.97072	6.40443	3.98825	4.30108	5.9129	4.05667	5.11507	4.75562	2.95726	2.77528	3.2463	3.02317	4.578	2.6418	5.29809	3.40547	3.8322	5.67247	3.43898	3.20656	3.75313	8.26168
HTA2-neg-47420491_st	3.56628	3.67138	5.22387	2.71956	3.3049	3.36926	3.24329	2.87519	3.17393	2.4801	2.57824	4.9501	2.90415	3.27849	3.3286	2.53565	5.40577	3.50461	3.16401	3.63383	4.08061	5.58857	3.88815	3.70041	2.71654	2.63265	3.86508	4.15888	3.85224	3.53645	3.88086	2.99166	3.45429	2.50336	3.54961	3.08426	2.99984	2.41961	4.59467	2.92956	2.806	2.87108	2.79224	2.68822	2.89258	2.73456	3.83044	2.52177	4.1201
HTA2-neg-47420492_st	4.14759	4.6564	5.05846	3.97837	4.7797	4.78285	4.03606	3.89364	3.88375	3.38713	4.54455	4.75677	3.70325	3.01183	3.66614	4.14819	4.07732	3.9069	6.11064	4.69865	3.25737	4.32065	4.23917	3.53583	4.59508	3.57501	3.23064	3.85507	5.1722	4.29493	4.9424	3.85307	4.71093	3.46179	4.86353	3.94965	3.84879	3.40771	4.80865	3.8086	3.4868	2.9431	3.97736	3.48995	3.64872	3.40584	4.19923	3.75064	4.10645
HTA2-neg-47420510_st	5.18214	4.89705	4.47003	4.64843	5.26869	5.71595	5.32414	5.61138	5.48313	4.57864	5.57929	5.5802	5.15082	3.73458	4.2861	5.09147	4.61011	4.46141	7.07798	6.02346	5.34748	5.09679	4.90947	5.38347	5.52987	4.2521	7.28091	4.52283	5.45178	4.60833	4.6794	4.58417	4.59879	4.89134	3.59143	3.94278	3.63658	4.1789	3.88563	5.10556	4.69876	4.50587	4.43368	4.15921	4.87952	4.09418	5.45403	4.12023	5.00664
HTA2-neg-47420512_st	3.61473	4.55285	3.54415	3.20412	3.74672	4.57114	4.29566	3.65815	3.35268	4.92653	3.21741	3.7675	5.24092	3.79034	3.91317	3.08153	3.20223	5.17207	4.09824	5.17961	8.12471	4.25246	4.3846	3.04953	5.47275	4.95603	4.32156	4.09019	4.17917	5.29306	4.00833	3.839	3.76862	4.26925	5.60562	4.94555	3.16326	5.14396	3.77415	3.76049	3.20967	4.07359	3.74539	2.82747	3.37554	3.42812	3.46685	4.84332	4.91657
HTA2-neg-47420513_st	8.66815	4.88039	3.44168	6.21366	2.55423	4.22495	4.18289	3.47086	4.08519	5.00046	6.15968	3.75329	4.07688	5.0519	4.98085	6.30249	6.66387	6.53352	5.27789	4.70309	3.7462	3.70071	6.70161	3.63759	4.87798	4.35357	5.67288	4.96588	6.91551	3.72217	5.81615	4.40155	5.36543	5.38104	5.57505	5.51608	4.75987	4.79403	4.14857	4.74162	4.7349	2.14116	6.02597	4.51862	6.47658	4.40496	6.13325	4.38878	7.2639
HTA2-neg-47420517_st	3.63845	5.03243	4.30226	4.9721	5.22634	3.63405	4.80326	4.32835	3.18375	4.58549	3.92314	5.15585	3.6409	4.11064	3.47989	4.389	3.21459	3.56942	4.72849	6.22268	3.59784	4.25219	5.79089	4.94275	5.35565	3.87005	4.13444	4.57628	4.36304	4.39256	3.44744	3.4168	3.77294	3.93471	4.90025	4.65686	4.81421	4.10308	3.42467	3.9099	4.41053	3.09083	5.53038	3.07928	5.2158	5.56127	3.72692	4.30059	3.68837
HTA2-neg-47420518_st	6.04103	4.92546	6.8225	11.2098	6.73845	7.07757	9.01882	8.29445	7.58876	11.1944	9.13713	5.23167	10.9707	10.0481	8.93831	8.31385	5.45581	6.26597	6.36375	5.36529	6.70543	10.4759	6.04194	5.35928	6.0336	5.89921	5.82296	5.54807	7.871	5.27389	8.04268	8.09361	4.70731	5.33647	6.47545	6.4118	6.1445	7.29029	5.13477	6.63659	6.01463	8.74926	8.62194	7.09189	7.94331	5.94323	7.80219	4.58163	5.68339
HTA2-neg-47420520_st	8.56597	5.89276	6.08084	5.25708	5.54776	5.82116	4.98053	4.49074	5.1718	5.68414	4.30178	7.45056	6.82996	5.09519	4.45379	5.19433	5.91287	5.11938	4.10265	5.33773	5.31387	4.8066	6.0819	6.45062	5.17598	6.47092	4.33763	5.38001	5.21864	5.6445	3.27263	3.81094	3.91977	3.51786	5.3741	6.21037	4.01959	3.90413	3.07747	6.65622	5.08416	4.28694	5.01268	4.22316	5.38303	5.1498	2.80611	4.89608	4.21751
HTA2-neg-47420524_st	4.66237	3.82105	3.55657	5.49492	4.03031	3.26305	3.81303	4.44619	2.61494	4.37122	2.69039	3.90636	3.86109	2.91543	4.93324	5.54156	5.02654	4.06129	5.7926	3.20273	4.38082	5.29883	3.62985	5.2126	3.03812	5.70145	5.51532	4.79522	4.05771	4.08869	5.96356	3.44692	5.11729	5.8704	4.96375	5.02388	6.1054	3.69362	2.66325	4.48171	3.29582	4.82621	2.8346	3.16508	2.90612	2.60227	4.8969	4.32368	4.94864
HTA2-neg-47420525_st	5.2202	5.88831	3.13626	5.83696	9.49976	3.60509	6.13563	6.43914	3.10946	5.66912	3.7879	3.56625	6.64731	8.03075	4.874	2.69334	2.6165	4.02978	3.78061	4.92715	3.57196	6.90502	4.64358	2.54444	3.63224	3.2269	5.83055	4.49233	3.9902	5.06923	3.21161	4.34578	3.45429	2.67104	3.03843	2.67889	8.31855	2.41961	4.80429	3.27496	3.33407	8.12449	4.23659	4.56105	7.02707	2.26907	4.80746	2.84958	4.0069
HTA2-neg-47420549_st	9.60425	7.65457	10.853	12.7693	5.75337	9.90134	6.66908	5.95046	7.44303	11.2118	8.47247	6.36627	9.47841	6.79743	7.8828	9.86786	9.61402	7.30511	5.41905	13.9371	7.83256	4.42292	11.1414	11.009	6.635	10.9896	7.68597	9.16047	6.8267	8.96543	4.84021	7.51384	5.38383	9.08204	7.19112	8.31536	8.62078	9.37059	5.40322	6.44063	6.91798	3.79466	7.62692	8.27016	9.43019	4.66833	7.32149	4.32201	8.87926
HTA2-neg-47420558_st	4.13337	3.94975	4.27768	3.84855	5.12767	3.87068	3.52636	4.24088	3.62085	3.23849	3.37435	3.29089	4.25489	2.73356	4.63366	2.87532	5.33803	3.87342	4.34927	3.2329	4.19427	4.69067	4.78765	2.38202	4.02048	4.86531	3.00633	4.33729	6.87441	2.25539	4.64865	3.90097	4.26129	3.73748	4.83527	2.97773	3.17913	3.01656	3.46038	2.93888	3.09631	3.12122	2.89757	3.60699	3.74761	3.134	3.5024	2.91033	3.16672
HTA2-neg-47420561_st	4.09371	3.82394	3.75345	3.60171	3.00478	3.7566	4.34597	3.32878	4.61348	3.18165	3.46451	2.61358	2.95291	3.10511	3.57243	3.0237	4.02323	3.14278	3.17568	4.29796	2.58636	3.75252	3.72824	4.28263	3.18479	2.78552	3.28813	3.22938	3.2565	2.68031	2.46401	3.13466	4.64187	3.4987	3.10726	3.15047	3.5148	2.4206	2.85544	2.93774	2.99321	3.17537	3.64415	3.76473	2.75749	2.74421	2.62626	3.10729	2.40203
HTA2-neg-47420566_st	2.36157	6.40645	5.87872	7.07042	5.49492	2.70853	3.58402	2.60697	6.57803	7.05496	10.0466	3.49147	2.99843	6.62004	2.51935	5.39259	7.06734	6.64176	4.26237	4.66993	3.01507	2.28639	6.17949	2.43365	5.55605	6.05013	2.78196	5.49781	8.88841	4.29795	2.85983	2.80873	5.7383	2.41086	2.9252	4.80028	5.28496	4.48808	2.32881	3.81045	3.63221	3.43852	3.29015	4.23659	2.34925	5.10965	6.72474	3.12695	4.94864
HTA2-neg-47420572_st	6.223	2.93603	5.49997	6.64369	7.29127	8.03489	3.34877	5.21442	7.43089	7.43925	7.96479	5.56301	7.02034	5.58029	5.96831	8.48631	8.7449	6.45324	7.2383	5.01606	8.75305	8.07621	9.90853	7.46886	8.70703	8.77044	6.7085	9.27633	7.53427	6.38095	3.17672	4.94623	5.52299	3.86532	5.00733	8.24882	11.1645	6.57463	7.97316	8.57595	4.636	4.4515	3.86355	5.95211	6.69221	6.72408	6.30334	3.18806	7.91495
HTA2-neg-47420575_st	6.56007	3.90938	6.20365	5.87984	8.28189	4.44896	5.84606	6.84772	6.00632	4.42631	4.5568	3.35763	3.38321	3.72138	4.12403	7.46921	4.35024	6.23646	6.0844	5.60835	4.80006	5.83292	6.90775	5.2126	5.11086	6.00112	3.35758	5.49781	6.59914	5.66589	5.42674	4.55546	4.55779	5.85332	6.87633	6.06428	6.36143	4.68135	5.20921	4.31097	4.66343	7.87247	6.6501	4.37274	3.28848	3.43581	5.39398	5.66509	5.39374
HTA2-neg-47420580_st	8.21784	5.56497	7.35516	5.71073	6.10955	5.78279	5.65738	5.14298	7.5839	4.95054	6.3503	7.53478	6.14061	4.57135	6.07699	6.06364	5.87019	4.90377	6.49318	6.13184	6.71209	4.9601	7.04543	6.98072	6.15012	7.98285	6.47575	6.01363	6.51275	5.88469	5.82636	5.81476	7.66034	6.41138	5.92235	6.52533	7.15022	6.11117	5.47693	6.81544	4.06896	4.77297	4.72316	5.49441	4.74707	4.07817	7.03854	6.31723	7.58347
HTA2-neg-47420604_st	5.3405	4.30921	5.03635	4.37794	5.2331	4.60901	4.78308	4.45036	3.64788	4.17045	4.07993	4.02477	4.65293	3.95452	3.56081	4.46751	2.9213	5.41189	4.07551	2.66831	4.05706	4.08572	4.92756	4.39541	4.44661	4.49666	6.07576	4.2435	3.90169	3.53645	5.71937	3.06856	4.68599	4.11273	3.68493	3.34118	2.93884	3.6323	3.17316	7.88134	4.50003	3.29952	3.74614	4.23659	3.28848	3.52158	3.85244	3.54911	3.72556
HTA2-neg-47420605_st	4.36494	2.85492	3.10529	2.63154	2.4323	5.18974	3.41198	2.6745	3.60453	4.03758	2.75557	2.91719	3.27488	3.57719	2.73073	3.01769	4.74795	4.80773	4.34053	3.73147	4.36394	2.71702	3.31159	4.40453	2.67048	3.01913	4.13534	2.81413	4.99937	2.65386	3.59477	2.80773	3.29062	2.68456	4.08732	3.33082	3.49279	4.05837	2.48554	3.67187	2.85139	3.65704	4.28109	2.6481	4.92808	2.70612	2.73163	3.6046	3.01508
HTA2-neg-47420607_st	5.58988	4.78863	3.27894	3.75403	4.39911	5.24887	4.5609	4.00773	4.04892	5.08501	4.73751	5.30635	4.1792	3.16837	4.14475	5.7062	4.28374	3.55484	5.92674	7.02166	5.65784	3.98349	5.26508	4.13158	4.70232	4.97313	5.4129	5.48942	5.29851	5.33664	5.96631	4.10007	4.71812	3.98006	3.11195	3.77946	4.21951	4.17224	4.78368	4.09465	4.04726	3.90448	4.85063	4.32552	4.18598	3.19668	3.90272	3.77296	4.02116
HTA2-neg-47420609_st	3.56859	2.77844	4.34459	3.30116	4.68069	3.03896	4.01393	3.14743	3.66519	3.45375	3.58167	2.44207	4.60752	3.42824	2.69305	4.03389	3.24152	4.29484	4.032	4.38656	4.32338	4.79557	3.04264	4.87703	3.0784	4.66311	3.56032	5.10178	6.55212	2.79707	2.97555	3.3149	2.87056	2.8702	3.91399	3.4945	2.57703	2.80939	3.4452	3.22428	3.81038	3.87324	2.8211	2.90296	3.51955	3.39863	2.75902	3.17957	3.01486
HTA2-neg-47420610_st	3.8778	3.42573	2.96558	3.49725	2.79724	2.52897	3.76909	4.47238	3.03578	3.03211	4.68944	2.77359	6.03522	3.26605	4.46304	3.20221	4.34647	4.36355	4.07777	4.55209	4.27289	2.61263	3.77783	3.71613	3.25641	5.85757	3.214	3.98701	4.12619	2.39693	3.01072	4.10275	4.06249	4.16041	2.94511	5.50799	3.13847	6.94038	4.62565	4.33523	3.24295	5.32899	4.18984	2.98959	5.17267	3.2562	3.15498	4.89245	5.75657
HTA2-neg-47420614_st	6.04146	3.93266	4.16751	3.78412	4.23464	4.48291	4.57532	3.54158	5.20403	3.66719	4.28983	6.59555	4.99572	5.68036	3.24901	4.51819	6.00601	4.25949	5.22926	5.48052	3.12663	5.65137	4.64888	4.03478	4.96838	5.34086	5.64092	4.91919	4.83708	4.63269	4.88058	4.73816	4.66502	3.42527	5.3145	3.86449	5.14462	3.97695	4.26752	4.83441	4.5463	4.51014	4.74952	3.95989	3.80537	3.85359	5.00456	3.11039	5.71321
HTA2-neg-47420617_st	5.21943	5.19363	5.52856	5.64845	5.96208	4.61668	8.94262	4.63784	4.26856	4.40011	4.47497	5.89657	6.31678	3.77267	5.0855	4.5614	5.42799	3.87872	7.4786	7.2471	6.14534	4.86889	5.33421	5.83913	5.8932	7.48569	5.13373	5.7081	5.46152	5.57558	4.63886	4.94899	4.12196	4.32782	4.97745	4.12889	4.33985	4.89574	5.18354	4.42798	4.16045	3.81887	3.48707	4.41486	4.83414	4.27093	5.87573	5.11166	5.99649
HTA2-neg-47420624_st	3.00388	4.95459	3.53098	3.28714	4.60489	3.44049	4.6957	3.75562	4.62391	3.75753	3.39593	4.09765	5.08661	2.86726	3.73557	3.25957	4.8479	3.46829	4.60755	3.81567	5.32642	2.84312	5.56171	4.90777	4.81887	5.2739	3.58449	4.53117	4.7009	4.1736	4.26617	4.5046	4.77437	2.85596	2.79782	3.3586	3.48037	2.96871	4.66924	3.3782	2.95356	2.78864	5.77807	3.13441	3.91378	2.78893	3.00261	3.99518	5.61613
HTA2-neg-47420625_st	4.36123	4.36123	4.7196	3.93461	4.1706	4.18401	3.31849	2.60685	4.1024	2.84156	2.76401	3.59229	5.04828	2.60528	6.1618	6.17374	6.53745	3.14649	4.03104	7.01787	4.38495	4.20523	4.72069	5.16514	3.85082	4.50138	3.89923	4.15528	4.35559	4.7557	12.3023	7.08378	9.61209	3.42383	4.57741	6.3005	6.29217	4.15078	5.17018	3.91368	5.54618	4.93718	6.3911	5.03633	4.6863	5.94967	4.14747	4.55679	13.5784
HTA2-neg-47420626_st	6.32243	3.61724	4.16604	5.86839	3.67694	4.3252	4.26291	3.72002	4.95495	3.99048	3.20189	4.89669	3.6057	2.8006	3.57588	4.43968	3.15526	2.97839	4.35977	4.15501	4.50664	4.91035	4.10312	3.55339	3.00505	4.93727	5.33007	5.62357	3.40789	3.61119	2.93548	4.00434	3.75134	3.87461	4.70638	4.00598	4.59571	2.68149	3.50138	3.16182	3.93309	3.23587	4.27637	4.54277	2.82018	3.60719	3.45501	2.9392	5.10052
HTA2-neg-47420630_st	5.58521	4.10081	3.20884	4.81855	3.70178	4.5974	3.66003	3.91966	4.96602	5.89236	4.78426	4.17746	6.57639	3.7274	4.14664	4.8546	2.83958	4.75716	4.03122	5.44105	4.36885	2.99755	6.13998	6.34563	5.10808	6.45534	5.83274	3.50379	7.07343	5.03997	4.43485	4.24584	3.91592	2.3539	4.93576	5.39365	6.30098	3.30696	3.95387	4.37214	3.57931	3.61909	6.59059	4.82348	3.9072	3.94008	5.53713	4.87916	5.79991
HTA2-neg-47420632_st	4.48832	4.86151	4.5242	2.94583	3.42759	4.10857	5.50405	2.62638	6.07318	3.42827	2.92451	3.42701	4.94854	2.94809	3.3077	3.89071	4.08887	3.44947	5.47572	5.41027	3.74173	4.21913	5.28806	3.36336	3.79493	4.80006	4.28716	4.27527	4.57308	3.08802	4.30188	4.32769	3.57104	2.59628	4.71901	4.11654	6.02	3.2861	5.42057	4.15866	3.04044	3.45576	3.86355	3.96347	4.43148	3.30522	3.86355	2.7314	3.63302
HTA2-neg-47420633_st	5.54038	4.65605	3.57416	3.48581	3.82317	3.9017	6.30626	3.71472	3.2061	3.25038	3.38204	2.79897	3.45577	5.42036	4.72157	3.53805	3.72252	3.81369	4.30532	5.88531	3.09724	4.17076	2.69074	3.06745	3.25972	3.04827	4.53912	2.87808	5.59733	3.21329	4.41412	3.91363	4.91877	3.32916	6.70651	4.26283	3.96931	4.58763	4.1654	3.92519	3.50654	4.76866	7.11712	7.07942	4.95089	4.90625	7.15035	5.86397	4.56762
HTA2-neg-47420639_st	6.86552	3.84467	4.11381	3.05893	3.00755	5.6772	5.50405	3.84651	3.83642	4.06666	4.7761	4.18007	5.18508	4.38082	3.62019	3.26305	4.44039	4.65165	3.95452	3.61845	3.25714	3.43012	4.44039	3.42781	2.90479	3.74464	5.56966	5.34409	3.22665	3.84651	4.12232	2.75202	4.71785	4.51774	3.74619	3.4582	3.03703	3.30696	3.6969	4.89239	2.61201	4.97002	5.63927	3.95138	3.74502	3.31523	3.94555	3.86849	4.28679
HTA2-neg-47420640_st	3.23112	2.77418	4.75212	2.94583	4.37081	4.15266	4.59013	3.98072	3.71786	2.52065	5.34216	5.13024	3.61635	3.79971	3.76112	4.04399	2.62963	3.72829	4.8272	4.92019	4.33402	4.02809	3.53566	4.29408	2.90479	5.65862	4.80158	4.79522	3.21625	3.24894	8.20649	4.94115	5.45975	4.72577	2.90589	3.15323	4.18952	2.83078	6.87386	3.6808	2.55629	4.18716	5.5293	2.92571	4.52592	5.03407	7.07356	3.39369	9.82023
HTA2-neg-47420645_st	4.27171	5.83957	5.60284	5.71584	5.46485	4.87205	5.83973	3.81887	5.52158	5.23194	4.61421	5.52601	4.60215	3.31599	4.61394	4.62853	3.74239	4.53712	6.18242	6.25821	5.25283	4.67951	4.44758	5.38282	3.87793	5.67477	5.59079	4.80112	5.51059	3.89306	4.80944	4.26344	5.03123	3.80556	4.00413	3.97758	4.05836	4.58728	4.78869	5.01182	4.45752	4.5654	4.2393	4.53589	5.57077	3.2221	5.20341	4.05753	4.20317
HTA2-neg-47420653_st	3.1398	3.14209	2.86354	4.84314	3.59189	4.29982	3.74973	3.49825	3.34583	3.44282	3.49141	2.78753	3.40643	3.63546	3.70224	3.53541	4.7491	3.60816	3.72378	3.14045	4.5977	3.13168	3.19181	3.17613	4.02649	3.10939	3.04444	4.59775	5.08571	2.97448	5.2161	4.22934	3.63237	2.90889	4.51361	3.42811	3.06016	3.52109	3.02259	3.87443	4.18066	3.0097	4.11114	3.15432	5.41031	3.32626	3.18363	2.76406	6.5386
HTA2-neg-47420654_st	6.29976	4.78819	6.36631	4.71443	5.30546	5.32345	4.57705	4.15879	6.02026	4.99197	4.95875	5.37499	5.54156	3.74932	4.17875	4.90939	5.30247	5.37098	7.04285	5.18356	4.822	5.31579	7.40052	4.76564	5.75625	4.85592	5.19504	5.48889	6.2376	5.0721	3.73833	4.69541	6.74393	3.1346	5.42864	3.50142	4.87634	3.99868	5.06707	4.63024	4.07275	3.58688	3.49733	4.27183	5.04876	4.87483	6.44505	3.85987	3.99358
HTA2-neg-47420655_st	4.51755	4.81804	4.31741	4.0464	4.74574	4.93956	3.12244	4.33688	2.66282	4.11855	3.40207	4.03009	3.18179	3.23328	2.95053	3.47508	4.04335	4.29263	4.07586	4.42593	4.51255	4.68718	3.9371	4.47836	4.0234	3.63003	4.17533	5.55086	4.77945	2.86354	4.66425	3.44045	4.6805	3.92875	5.80446	3.00806	3.86502	2.59254	3.78538	3.92809	2.81684	4.38898	4.24864	3.88851	4.85908	2.66501	4.46603	5.51546	5.51781
HTA2-neg-47420658_st	7.89468	5.83001	4.21187	5.47172	5.07997	4.63664	4.73919	3.4196	5.09285	6.69896	4.37223	3.79656	4.16508	2.94273	6.35984	5.31277	4.52621	2.76115	5.79554	5.86537	7.93306	3.06856	6.0297	4.97174	5.4737	4.81533	3.40048	4.89816	5.51282	6.21258	4.52167	5.19138	4.04599	5.19502	7.76188	4.23192	4.61359	5.33399	5.35046	6.61056	4.27891	5.49627	4.09845	3.76719	3.55361	5.65052	6.72474	5.70184	5.33327
HTA2-neg-47420659_st	4.62369	3.97589	4.35297	2.42658	4.95644	4.39339	3.63502	3.61316	3.04699	3.81567	3.15221	2.72438	4.80353	3.09683	3.96636	4.49118	4.68917	2.96289	3.301	3.6503	3.84574	3.34438	5.1254	2.80834	2.93478	4.04605	3.59322	4.19306	3.56321	4.30177	3.94018	4.03366	4.25715	3.94684	3.03837	3.55362	2.67728	3.91517	2.8136	4.84818	2.54114	4.43333	4.05786	3.10266	3.55702	3.84471	3.19567	3.82595	3.01023
HTA2-neg-47420661_st	3.65026	4.12255	6.10483	6.3312	4.23148	4.7043	5.86114	3.81717	6.1009	4.08294	4.87263	5.19476	5.53347	3.91825	5.48609	5.48555	6.1716	3.63389	6.67802	6.16763	7.02184	5.16636	4.20285	5.54733	4.77606	4.79992	3.16865	5.32304	5.442	4.89265	4.06426	6.08766	5.86183	5.01064	4.99007	5.03301	6.50886	4.93491	5.38887	6.50947	2.98375	5.55018	6.94133	5.68112	4.70442	4.06036	4.82117	5.42968	3.85909
HTA2-neg-47420662_st	6.60955	6.06948	2.6311	5.73702	5.91602	3.0663	5.19092	5.49252	5.19212	4.62137	7.35018	5.91721	8.02636	3.27849	5.49773	4.59223	4.4398	4.59994	4.82844	5.84149	4.5658	4.75449	6.49712	4.79287	5.76012	5.50473	8.05412	5.19385	5.06302	5.69552	4.01626	6.31611	2.32094	5.79498	5.35341	8.44702	4.62497	5.05115	3.47363	4.4754	5.6243	3.37056	4.56105	6.48278	3.73308	4.71399	4.91996	5.12561	5.60889
HTA2-neg-47420663_st	6.13563	7.98359	4.62639	5.11012	3.78615	3.42059	2.7188	3.05861	6.97936	4.81275	2.89709	6.18271	4.92832	6.06703	3.84754	3.15828	4.10957	4.54674	4.79811	5.22121	4.05706	4.80006	4.9145	3.20699	4.16798	4.04057	3.16799	3.81224	2.81459	4.54897	3.35056	3.01896	2.76952	3.03319	3.40801	4.24476	2.63203	3.57128	3.76374	3.23225	3.52581	4.82621	2.38895	2.09551	2.65934	2.90048	3.70033	2.17155	3.68135
HTA2-neg-47420665_st	8.79852	7.96586	6.26544	7.69097	7.70234	5.41609	6.72732	6.23988	8.44038	6.77722	5.90287	6.71633	7.59521	6.26165	2.95053	6.50919	8.45263	5.00976	7.97382	10.0996	7.65966	6.988	8.02209	5.2126	7.93983	8.23843	6.7649	7.37896	7.69194	6.84986	6.14644	6.56541	5.9876	4.11273	5.70547	4.51162	7.23807	5.70142	6.03405	3.85743	5.02083	3.80948	6.03479	5.88272	4.83286	5.28922	4.42465	5.6649	5.01607
HTA2-neg-47420666_st	4.61244	3.29159	3.75874	4.34212	4.79188	4.85642	4.17268	4.33863	7.16271	4.86421	4.62413	4.65436	5.68117	4.32313	4.00021	5.11799	5.63702	3.63758	5.18058	6.85224	3.71147	5.11907	5.32182	4.70725	4.47592	5.15278	4.52166	4.57745	3.95182	4.52882	3.85535	5.40138	4.9122	4.48105	4.08938	4.40016	5.78009	4.33022	3.75736	3.66557	2.55485	3.5703	4.0757	4.23838	3.69706	3.04044	4.22572	5.62707	4.53798
HTA2-neg-47420668_st	4.41763	3.79483	4.29529	5.08484	5.82221	4.52563	3.47656	4.62302	5.54555	4.18162	4.69475	4.58411	4.73597	4.325	4.79136	4.77312	3.54114	4.27561	4.7166	3.8807	5.31564	2.91051	4.371	5.88622	5.80971	4.16499	4.44025	4.818	4.82271	4.99489	2.85983	3.66571	3.65132	2.92007	4.12626	2.70622	4.25271	3.26845	3.3211	4.2228	3.25677	2.95278	2.36385	2.88962	3.9664	2.7387	2.63286	2.79079	2.43324
HTA2-neg-47420669_st	6.23096	5.14664	4.12764	6.24305	5.50599	5.62364	5.38874	5.09493	6.35723	6.30177	4.9469	5.4539	6.79934	5.313	4.17824	5.50307	4.93905	6.35244	6.64032	5.13961	5.88098	7.11981	6.25558	4.94088	5.86054	6.91709	4.73478	6.76133	6.32782	5.73536	4.1329	4.28288	5.48659	5.06655	5.72123	5.49831	5.74711	4.99443	4.73378	5.2361	4.50344	4.67027	3.76072	4.08585	4.16149	4.43817	5.31	4.42963	6.39777
HTA2-neg-47420693_st	5.22312	6.08263	5.8168	5.79267	3.77131	4.09923	4.07057	4.79032	5.05839	5.0477	5.1313	4.70336	4.67746	4.34387	3.91457	5.05621	4.11602	5.26751	4.49203	6.17164	4.51083	4.86276	5.67324	5.88245	5.10903	4.16505	6.84326	6.03884	4.42428	4.69283	2.55471	4.27596	4.54653	3.49246	5.32549	3.68807	4.5639	4.92865	2.90606	3.9592	4.28465	4.18431	5.97773	3.64622	3.75175	6.21918	5.55768	4.19302	4.69766
HTA2-neg-47420704_st	4.28881	2.35578	6.52935	2.94583	3.66759	3.58628	2.94248	7.24109	3.88815	4.17045	2.52074	3.90774	5.65313	3.58402	4.55969	6.09579	2.44399	6.45324	5.17207	7.13541	3.01507	5.41288	2.43086	2.54444	3.19286	6.32804	8.57494	4.15888	6.59914	2.81847	9.24491	2.34701	4.93082	2.01356	2.47224	3.56191	2.26794	2.74662	2.46898	6.78049	2.44563	2.22475	5.41645	2.69924	6.85555	3.90598	5.16128	4.70772	3.58888
HTA2-neg-47420711_st	5.97319	6.83664	6.22937	4.45155	6.64496	6.12633	4.72321	4.33475	6.33893	5.0622	5.25384	6.9796	5.50405	3.97798	3.70418	5.04159	6.4924	4.96447	7.9422	6.70964	6.59558	7.50661	6.80192	6.04125	6.79315	6.09118	5.61883	5.84633	6.22248	7.37481	5.06912	4.7736	6.62858	4.63611	3.56153	2.99579	6.3243	5.32801	5.7515	4.75404	5.5776	4.58161	4.60142	5.26056	3.26635	3.74785	5.59754	4.3057	5.697
HTA2-neg-47420716_st	8.45138	4.7855	4.71156	7.1293	6.78073	10.6556	10.5726	4.33475	5.23769	9.88253	8.34671	5.41905	4.82872	3.27849	8.72049	10.6153	11.6827	7.35537	5.87872	5.41027	11.7586	5.98633	8.75907	7.92389	7.27635	6.42523	5.31047	7.05892	12.1557	7.35537	8.85957	10.4071	3.06415	7.41495	10.1709	6.69193	3.3381	6.39367	6.31611	12.1657	9.66656	2.5624	2.83737	9.70965	6.42221	3.58972	8.09204	4.56105	8.41007
HTA2-neg-47420723_st	3.68826	3.8252	4.76693	2.93125	4.17004	3.98972	2.63222	2.72462	3.72566	3.10496	4.25668	4.1689	4.91966	3.87787	3.02067	4.34581	4.06644	2.80728	5.51131	5.67683	2.5893	2.81538	3.2246	2.64369	5.11454	5.49787	3.44562	3.5697	5.17002	3.29086	2.37229	3.15565	4.96406	3.5788	2.78698	2.76463	3.93939	2.53967	4.0334	3.0805	3.01258	2.35341	2.59038	2.24231	2.71605	3.61993	3.04894	2.45481	3.2843
HTA2-neg-47420725_st	3.81	3.54231	3.65126	4.4626	4.76163	4.5872	3.83091	6.26336	5.79946	3.75169	4.41935	5.08143	4.59964	5.27183	4.72668	4.94661	3.39146	3.82823	4.22776	4.4583	4.87531	6.54883	5.05113	3.59188	3.63867	5.83388	3.95227	3.66443	4.0327	3.74311	3.869	4.11601	3.04902	4.35646	4.88301	4.1274	4.16924	5.5249	3.7898	4.14101	3.65465	4.84144	3.40531	3.54783	4.39632	5.15831	4.04831	4.28694	3.16777
HTA2-neg-47420727_st	5.21904	4.46222	3.8873	4.37424	6.38444	5.12297	4.99936	4.30771	6.30499	4.54596	3.81618	4.09154	4.29795	3.9235	3.53455	3.81825	3.78114	3.58967	5.02391	5.04507	3.95623	5.02756	5.64538	3.91802	3.52426	4.06022	4.13795	3.57307	3.61293	4.61364	3.91942	3.86895	3.03647	3.03175	3.11522	3.51062	2.82574	3.02025	4.752	3.59829	3.61942	3.62676	3.22117	4.28391	3.64685	4.38743	3.40778	3.02147	5.47083
HTA2-neg-47420729_st	6.23816	4.54404	4.78319	3.41116	3.36946	4.15162	3.44585	4.7092	5.62119	6.076	4.32702	4.57874	4.94624	4.42004	3.93627	4.17823	4.56425	4.59036	5.79539	3.68301	5.21486	4.76703	4.33623	5.06423	4.17376	6.02707	3.05134	3.93258	3.6928	4.25321	3.87573	4.87403	5.85887	3.95726	5.00956	3.49324	4.55414	3.85076	3.36355	4.25741	4.59199	4.81108	3.43738	4.98706	5.35504	3.54382	7.41619	3.58504	4.0761
HTA2-neg-47420731_st	9.63012	7.74021	8.06953	7.34804	5.08137	6.86941	5.71537	6.65999	4.21957	4.94873	5.62848	9.2841	3.18883	4.13871	7.03635	6.10667	6.81621	6.33024	10.9091	6.26706	7.46733	2.96748	5.91127	5.68558	7.94012	6.3581	8.88489	5.75896	7.20891	9.28415	5.43539	6.47109	5.26466	6.32017	2.37357	4.50604	4.44622	5.66264	8.4205	4.54412	7.60354	6.78277	4.98311	5.16327	8.59064	7.50542	5.6613	7.57316	6.55021
HTA2-neg-47420743_st	4.37913	3.25455	3.00086	3.85371	9.88007	5.57333	5.11327	3.3109	5.00986	4.72677	5.29201	3.66677	4.17156	3.74626	4.50192	5.91543	4.56744	3.94448	4.61527	5.52928	4.42867	4.19443	5.09732	4.55986	5.31324	7.10838	3.03748	3.79234	4.21781	3.03371	4.72852	5.57683	4.87153	4.34146	3.05629	4.17815	5.40464	4.56312	5.66685	3.96013	3.59908	4.50156	4.85794	3.80229	6.02706	4.16798	2.91039	3.95691	3.69383
HTA2-neg-47420755_st	3.85728	3.50754	3.14834	3.462	3.73911	3.49967	3.78929	2.89709	4.00779	3.48624	3.07804	3.06616	3.331	2.88825	3.05606	3.23804	3.79019	3.26772	4.37986	3.86493	2.83325	3.1802	3.64307	4.29079	3.32695	3.04225	2.92355	3.48275	3.81506	3.83262	3.17236	2.97347	4.33793	3.57358	3.56967	4.04432	3.75755	2.98162	4.49002	3.63682	2.66377	2.75003	2.93289	3.92013	4.47112	3.13352	2.9957	3.65692	5.04499
HTA2-neg-47420757_st	5.12021	4.58535	4.01808	4.57509	6.76863	5.74996	5.30228	4.66142	6.69082	5.19115	4.89127	3.98703	5.90495	5.10322	3.34697	5.85032	5.07315	6.95087	4.85076	5.26209	4.85768	5.43907	6.78746	4.17007	3.85762	4.88679	4.24975	5.77526	5.68115	4.80335	3.56262	4.43393	3.26283	3.46939	4.40526	4.12137	5.26905	4.50158	4.96906	5.46593	3.78151	4.22145	3.47601	4.90512	4.02871	4.25155	5.1228	2.50682	4.50766
HTA2-neg-47420761_st	5.0838	5.32346	3.64405	6.35763	11.6952	5.30499	3.25914	5.74831	4.80242	4.59501	5.25384	4.06458	6.79709	4.40141	4.54913	3.74464	6.95273	4.22181	8.96543	9.60807	4.5324	5.43347	5.52464	5.23318	5.82628	4.1848	6.64634	5.71397	10.328	5.07691	5.69221	6.63105	7.2953	3.85002	5.47731	5.11507	5.60692	6.1508	3.02641	3.35755	3.81631	2.73106	5.4878	5.25536	6.17685	3.9841	7.36893	4.10416	5.22244
HTA2-neg-47420765_st	5.45198	4.31922	5.33765	4.70669	3.3042	3.36278	3.0934	3.1412	4.49596	3.82276	3.73086	3.38786	3.34994	2.83707	3.2335	3.32893	3.83536	3.19813	5.09735	4.72111	5.25435	2.8172	4.40326	4.80519	3.70844	5.46996	3.73444	3.97944	3.32424	3.89893	2.85993	2.96291	3.49764	3.51138	3.71861	3.22272	2.98582	3.21612	3.74235	3.40776	2.9462	4.29013	3.06887	3.39453	3.06116	2.67476	2.84612	3.09342	4.27976
HTA2-neg-47420772_st	6.42764	4.51461	7.08706	5.04534	6.31938	5.40215	5.46522	5.6871	5.23769	5.22939	5.2333	4.71458	5.03839	5.0331	4.83418	5.63868	4.96156	3.97522	7.21401	4.86748	5.51996	4.4607	4.50047	5.93571	4.99427	5.0787	4.93876	5.34762	6.45386	4.01456	5.27826	3.07301	4.90537	4.85381	5.3145	5.09173	4.80139	4.36832	2.99814	3.37531	4.15386	6.06434	5.2203	5.51074	4.72886	4.33355	4.21442	3.62813	5.13117
HTA2-neg-47420776_st	4.31057	4.03119	4.3309	4.93245	5.16699	4.33722	3.70976	4.19204	5.0413	3.68706	4.20437	4.03753	4.32789	3.6451	3.70604	4.62128	4.70188	4.25052	5.69407	4.75768	5.02664	3.90186	4.33226	3.90154	3.93287	5.02577	3.79797	4.8887	4.322	4.96148	3.42156	3.47299	3.44733	3.16968	3.16455	2.70783	2.58483	2.82822	3.12525	3.29578	3.24878	3.03906	2.96477	2.55447	3.11678	3.43958	2.92633	3.25202	3.20191
HTA2-neg-47420779_st	6.68993	5.65194	6.3831	4.29909	5.77278	6.27972	7.05948	5.89961	6.76222	5.94486	5.88339	5.91654	5.44873	5.39263	4.75959	5.78627	7.40061	4.52266	5.75898	6.52117	6.50641	7.66893	5.70697	5.1153	5.79117	6.85653	5.33251	5.65653	7.70504	7.1088	6.45634	4.07806	5.04013	5.2247	4.78425	4.88454	5.09836	4.39225	5.01382	5.0298	4.98322	6.0635	5.58075	5.33026	6.15216	6.65393	7.23951	4.36777	5.42134
HTA2-neg-47420781_st	3.41702	3.46395	3.84754	4.00304	2.35136	3.80029	2.7188	4.11125	3.34607	3.00966	2.69039	3.61635	2.73462	2.54187	2.30062	2.62254	2.52969	2.14522	3.26733	3.1281	3.29896	4.14252	2.81459	2.94542	2.53218	3.42781	2.65746	2.19982	3.26305	3.08802	2.07168	2.13502	3.06415	3.03319	2.21207	1.99965	4.6233	2.50391	4.05858	3.94265	2.53216	2.87108	3.86355	2.61851	2.34925	2.65066	4.42465	3.71181	2.03478
HTA2-neg-47420786_st	5.35751	6.34693	4.95666	5.9854	5.00148	4.61604	4.95843	4.94537	5.78228	5.51546	4.80304	6.72203	5.15443	5.12526	5.41913	5.90188	7.13097	6.15421	6.78214	7.60162	5.78689	5.66647	5.52667	4.43248	4.61583	5.7788	4.84086	4.76589	6.66436	5.05765	5.03339	5.04269	5.61722	3.92047	5.23988	4.97726	5.27264	4.84264	5.7376	4.72958	4.30333	4.43012	4.79863	4.81093	3.99927	4.56867	4.84012	4.29006	4.75839
HTA2-neg-47420787_st	4.03775	3.95035	5.39907	2.84509	5.91112	3.34706	4.05975	4.16884	4.24845	3.51566	3.74097	4.01521	4.20954	4.66298	3.34393	4.70801	3.13602	4.72301	6.22038	5.75395	4.51828	4.38635	4.06314	4.04453	3.62296	4.77007	4.11786	3.19415	3.21681	4.56974	3.07239	3.30839	3.25922	3.03667	3.35652	3.83912	3.40624	2.92188	2.76592	3.19578	3.90818	4.64849	3.32503	3.17633	4.36398	4.57761	3.11202	4.85848	3.52884
HTA2-neg-47420802_st	4.31594	5.702	5.7552	4.69617	3.66759	4.07146	4.29896	4.70418	5.41194	4.11855	3.2472	4.73273	4.55069	4.13086	4.01264	5.61812	6.97683	4.64668	7.35341	5.88107	5.21836	4.92651	5.30789	4.0164	2.90479	6.34032	4.75075	5.26051	5.92912	5.56941	3.92422	3.98511	4.005	3.98804	4.89381	2.41646	2.55471	5.70916	4.9469	3.60363	3.80586	3.92055	4.56901	3.30758	3.51358	4.28418	3.23324	4.91697	3.51017
HTA2-neg-47420804_st	7.27177	5.73068	5.97448	4.09813	5.72172	6.08681	4.58549	4.90208	6.17017	6.02732	5.3773	6.67684	8.69104	6.78486	4.24403	6.21298	9.44809	5.05593	10.1564	7.30728	7.94931	7.09171	6.07277	5.33007	6.52197	6.96272	5.81449	5.36957	6.00206	4.37705	5.58951	5.64151	5.82541	5.14058	6.35828	4.93696	4.54681	5.61695	5.20394	5.65116	4.83364	4.07473	6.73279	4.16203	6.10681	6.12805	4.29341	6.81154	6.37507
HTA2-neg-47420806_st	4.10064	4.12476	5.69246	3.94765	3.78006	4.2022	4.08544	3.92963	3.79656	5.18744	4.48263	4.85125	3.99745	3.14425	3.67101	4.4922	4.94314	4.08492	6.07124	4.04991	4.57757	5.06707	3.92453	3.58325	4.39846	3.66759	4.27563	3.08802	8.567	3.98292	3.74127	3.57572	4.13385	3.61794	3.87437	3.36495	3.63029	2.93176	3.99213	3.32074	3.6425	3.37155	3.46739	2.65925	3.22546	3.64933	2.98263	3.95825	4.38261
HTA2-neg-47420814_st	7.94604	5.97823	4.77613	8.78245	7.08232	7.12833	5.43734	5.28358	8.7029	7.19782	5.2793	6.79023	6.56588	4.63746	4.60131	5.65954	5.69033	5.23914	4.36818	7.04351	7.53555	5.36956	8.63373	4.89433	6.44816	7.29324	5.49574	6.39359	7.56321	4.68092	4.51465	4.65475	3.50842	4.14077	4.98987	3.30469	6.25158	2.86381	3.81297	3.27638	3.32785	3.93205	3.38352	4.87131	5.26024	3.61157	3.82234	4.67617	3.75749
HTA2-neg-47420815_st	4.05557	4.01849	3.19999	5.03285	5.71279	6.20942	4.45747	4.952	6.2481	5.0758	4.29016	5.69183	2.75835	4.16908	4.00828	4.58016	4.71806	5.90582	5.69308	5.2491	4.74383	3.8394	4.44614	4.32803	4.86417	6.05215	4.55753	3.31673	5.31194	3.67772	5.74413	4.93396	4.65804	3.31305	3.38322	4.8206	4.41896	3.71514	4.52823	5.67014	3.63003	4.17766	4.2718	3.73893	4.59086	3.49297	4.74285	4.87962	3.40858
HTA2-neg-47420820_st	4.24604	3.32193	5.41866	4.08725	3.00568	4.0888	4.02013	4.01062	4.47304	3.32316	5.39894	4.63866	3.70568	3.05284	3.42237	3.6165	4.62704	3.32579	4.45486	4.62097	4.05913	3.23805	3.04218	7.84704	3.95867	6.18438	4.04722	2.74994	4.9229	3.88563	2.87055	5.45603	3.6558	6.95893	3.16957	4.16809	3.64928	3.84236	3.27478	2.80038	3.89538	3.56035	4.65423	3.96525	3.21636	2.87572	5.09799	4.25099	5.1346
HTA2-neg-47420823_st	2.43534	3.44617	4.4044	4.4437	3.62573	3.08945	2.90646	2.77799	3.72705	3.49302	6.11147	3.61416	3.33039	4.56946	3.14858	4.21304	3.89946	2.34579	3.06026	3.96847	3.33468	3.3419	3.29171	3.24341	2.82024	4.21067	3.08649	3.21092	4.12513	3.14278	4.20381	4.34817	4.15953	3.9932	4.504	3.75029	4.04333	3.15662	4.14042	4.0659	3.56875	2.83226	3.91853	3.44277	4.81556	3.66695	3.72085	3.16779	3.97344
HTA2-neg-47420827_st	9.20057	9.56495	10.0154	9.01959	8.96894	8.35838	8.42804	7.79346	9.6109	9.13788	7.64432	9.20795	9.09497	6.66967	8.20938	8.5317	10.922	7.70647	10.5564	10.2895	8.42253	8.54781	10.1274	9.03951	9.84579	9.10543	8.05696	9.03477	10.2359	8.24118	9.71958	7.72919	9.9269	7.36586	7.65231	6.54948	8.88472	6.7989	8.35028	7.16708	7.93915	8.14014	7.27395	6.68976	8.01082	7.28812	7.88899	7.68793	9.53362
HTA2-neg-47420835_st	6.30422	6.38489	6.79712	5.52433	5.01194	5.73904	5.05255	4.19476	6.39253	5.41023	5.73808	5.45984	5.3381	5.05434	5.40238	5.91219	6.94463	4.89716	6.56547	5.72073	6.46169	5.85755	6.57538	5.18429	6.88046	5.70912	5.02116	5.47063	6.0364	5.11871	6.83149	5.46777	6.13322	4.4533	5.03221	5.25424	6.68587	5.00078	4.60736	5.45318	3.8625	4.11558	5.08348	5.64237	4.31561	4.4293	4.43222	4.8377	5.65579
HTA2-neg-47420851_st	4.06487	4.14887	4.92455	4.37641	3.71393	4.89412	4.20101	3.88741	4.8027	4.19944	3.44111	4.13889	5.34222	3.25015	3.54079	4.33654	3.56397	4.13986	5.17867	5.89868	4.22656	4.6456	5.19913	4.13881	3.73649	5.81586	3.69029	4.55248	4.00938	3.42487	5.05338	3.32099	3.84425	2.96143	2.732	3.21231	3.21724	3.57761	3.62783	3.97643	3.91686	2.91332	2.82301	2.92848	3.13156	2.92538	3.78728	3.18973	4.86229
HTA2-neg-47420857_st	6.94054	5.37773	5.3124	3.82525	4.26548	5.14213	4.03084	4.00455	5.1492	5.15229	4.31552	5.01512	5.14223	3.80834	4.88795	4.8972	5.32306	4.39762	4.50717	6.12268	5.24216	5.2979	5.3431	4.7656	5.79343	4.86659	5.21917	4.33546	4.98827	4.71726	4.06478	4.5324	4.74446	3.26501	5.03319	4.9938	6.4136	4.10527	4.66191	4.23323	4.10992	4.41875	4.70656	3.45635	4.63567	4.23241	3.43787	3.60109	5.08826
HTA2-neg-47420860_st	8.39278	6.98958	8.23643	8.67273	6.98616	8.60242	6.05644	5.81909	9.27189	8.27799	7.63035	7.38213	7.74398	6.3736	7.09094	8.57253	6.79401	7.24692	7.48704	9.79788	8.66586	7.17922	9.41302	7.60934	8.14286	8.30602	7.49696	7.51673	9.41173	7.57885	7.18855	8.86532	8.37641	7.78106	7.41711	6.69432	7.18853	6.82625	7.06924	7.14101	5.64657	6.9178	4.90306	6.4559	7.15452	5.61537	6.54422	6.56666	8.53794
HTA2-neg-47420864_st	3.52036	3.37402	4.26564	3.02428	3.63638	4.02311	3.45363	2.56103	3.21412	3.53661	3.06491	4.86622	3.16119	3.0594	3.56192	3.89744	3.75668	3.05129	3.43286	3.32168	3.09342	3.28176	4.36007	3.30077	3.36294	3.71281	3.63355	3.51336	3.83613	4.26658	4.80722	3.72764	2.95772	3.92833	3.60001	2.60557	2.88494	3.32353	3.3425	2.54154	3.58861	2.42606	3.65571	2.75586	3.59227	3.38857	2.92687	3.03684	3.75462
HTA2-neg-47420867_st	10.3648	9.35403	8.12003	7.73093	7.93136	9.52547	8.96751	7.94989	10.2778	8.91593	8.17547	9.39163	9.94653	7.63002	7.26063	8.53843	9.65268	7.69756	10.1697	10.2546	8.3199	8.20474	9.95401	7.95581	8.71205	9.92879	8.49207	9.32376	8.93963	8.98338	7.21412	6.27555	8.20888	6.97034	7.42359	6.02794	6.31599	6.72845	7.6358	6.05626	6.49225	7.75043	7.18773	5.39614	6.12006	4.56309	6.62549	6.75477	5.72768
HTA2-neg-47420874_st	5.10833	3.12363	2.72629	2.86953	2.80868	3.28737	5.34486	2.87517	2.95078	3.59332	3.00164	3.34438	3.10773	3.18211	2.9847	3.72366	4.83755	2.62867	6.13963	4.50006	3.60252	4.09025	3.85548	5.06988	3.79099	5.20982	3.0863	3.39187	5.11492	4.44268	4.67535	3.26758	2.85609	3.19628	3.58088	2.2309	3.50478	2.60501	3.37469	2.89275	3.60343	4.38143	3.90893	3.23205	3.27093	4.58493	2.8117	3.20487	3.46835
HTA2-neg-47420882_st	6.2683	8.7551	9.53914	7.94815	7.91356	6.42352	9.09613	8.25826	7.80756	6.42914	5.67541	8.79043	6.37955	8.30502	6.77182	6.87392	8.64194	4.96331	6.50478	7.19568	5.836	9.64088	6.28114	7.49365	9.49555	6.39129	8.53717	5.38205	9.32558	7.7005	5.35933	6.11903	6.16242	5.86549	6.56245	6.35307	6.59654	6.34083	6.25544	6.62555	6.49041	6.93289	6.51298	6.70027	6.27514	5.15736	8.19452	5.57337	4.91848
HTA2-neg-47420897_st	3.33764	4.32734	4.78222	3.94216	5.33619	3.60951	2.37864	3.49505	5.49315	2.39296	3.03335	2.40793	2.76149	4.07661	2.64177	6.12267	5.57334	3.32219	2.85899	5.73156	3.05492	5.30805	2.64412	5.04157	3.7313	4.04057	4.43834	3.80999	5.42002	3.87338	7.20885	3.83256	5.73814	3.89106	4.7824	5.10818	4.13117	4.72172	3.7191	3.13643	4.05393	3.24591	4.04532	3.66773	4.14456	4.3997	3.83218	5.03118	5.41627
HTA2-neg-47420898_st	3.11166	4.21756	2.82128	3.2542	3.81577	5.15416	4.66953	5.28012	5.25139	3.54703	3.92291	3.10209	5.86293	4.09518	3.98992	4.17629	4.04416	4.70509	6.55516	6.67034	4.34365	4.21305	3.99788	5.14833	3.66197	5.91348	2.85444	2.71234	3.22512	4.32915	2.91394	5.04742	4.29357	3.4749	3.41154	3.70369	4.74144	3.80896	4.79821	5.8696	3.14866	4.73109	2.61007	4.01981	3.4626	3.43369	2.66097	4.06636	5.07401
HTA2-neg-47420903_st	8.42814	7.89381	7.1395	7.33215	7.21476	7.61692	6.58693	6.91844	8.00876	6.80542	6.50142	6.01448	7.30252	5.80455	6.70057	7.56199	7.84295	6.43072	8.11576	9.19831	7.7818	7.56376	8.52608	6.57211	6.38287	8.54039	6.74795	7.89664	8.77356	6.86072	6.07171	7.12374	6.13534	4.35646	6.23827	6.2195	5.77242	5.26952	5.4518	5.62257	5.23302	5.07832	7.19465	4.71426	6.70634	4.33939	7.12871	4.5692	5.69143
HTA2-neg-47420904_st	4.0777	4.92596	4.05228	4.00304	4.76043	2.04827	5.99121	3.72807	5.02654	3.89802	2.69039	2.85491	2.90415	3.84651	4.31419	3.26305	5.73702	3.32025	7.02592	5.58029	3.74173	4.14252	5.18685	4.29408	2.43616	3.2563	2.54717	4.99602	7.57393	3.53645	2.07168	2.34701	5.99206	2.50336	3.18391	3.64245	5.41052	3.30696	2.40121	2.51618	2.35928	2.5624	2.43976	5.64397	2.34925	2.34983	3.52838	3.12695	8.05222
HTA2-neg-47420908_st	12.6455	11.0244	11.0531	11.1289	12.169	12.6103	12.0066	10.0406	10.627	10.7234	10.6104	12.5508	12.2543	10.4586	10.3315	11.1481	13.3429	10.4773	12.4913	13.2562	11.8789	11.5252	13.5827	10.0889	12.5136	12.5971	10.8344	12.4398	11.5323	11.8205	10.0036	7.83732	8.90125	8.43819	8.64804	7.34593	7.75251	6.29069	8.66302	7.3485	8.02558	8.20226	7.65014	6.91625	8.5089	7.6313	8.61747	7.68793	10.6561
HTA2-neg-47420910_st	5.18764	5.78999	6.88676	4.78952	5.48292	5.50879	5.16284	4.36472	3.59641	4.0854	4.3576	5.47426	4.199	4.23741	4.45737	6.33822	5.37826	4.10541	5.08421	3.99109	4.51754	5.87687	6.09117	5.96698	5.46928	5.84077	4.56044	4.51897	4.50269	3.44309	3.46257	3.55154	4.90725	5.71914	3.35229	5.41421	4.59202	3.30602	3.57423	4.46473	4.4047	5.7803	4.03778	5.74192	4.80197	4.41391	2.70945	4.13518	3.32527
HTA2-neg-47420912_st	10.0859	7.21801	8.86696	10.0976	8.45756	8.48891	6.38919	8.20336	8.96666	10.0329	8.18823	8.30621	10.1622	6.84495	8.47071	8.56592	10.1632	7.89652	10.9833	11.6258	10.6533	6.94627	10.4852	8.03576	8.5182	10.0826	9.85871	9.93022	9.25378	8.97192	8.20055	10.4285	7.09545	10.2522	9.79213	9.05706	10.0692	8.66122	8.28471	8.99585	7.81408	7.3375	6.38283	9.40242	9.81258	6.80876	10.7991	8.2212	10.1273
HTA2-neg-47420916_st	6.74143	4.96555	5.27577	6.04433	5.62139	4.83344	5.04247	4.07954	5.61948	4.2862	4.92551	5.21447	4.2984	4.1124	4.19928	5.61797	4.35972	4.62526	6.35517	3.84009	5.25258	6.38592	4.97978	4.6201	4.32154	6.66238	6.5146	5.20787	4.76238	5.22555	4.01056	3.29988	3.26828	5.0341	3.8963	2.98148	3.41663	4.09667	4.02223	3.12116	3.12671	3.89325	3.96783	3.62746	3.46361	3.03316	4.20695	3.86903	4.2876
HTA2-neg-47420925_st	8.96896	8.68887	6.27569	7.03927	8.04576	6.99041	6.15621	7.04234	8.67975	7.31559	5.73538	7.24133	8.88266	4.88951	5.73294	6.93051	9.06409	6.29382	9.26396	8.89345	7.47341	7.44385	8.61658	4.86246	7.24613	7.39346	7.25377	7.92462	8.69927	6.70766	5.85658	6.43762	6.3858	6.20131	5.71534	4.66452	6.20502	4.94467	7.49647	4.91222	6.51841	5.10693	7.11469	5.96181	5.17889	5.46025	7.11897	5.10912	6.83839
HTA2-neg-47420926_st	7.54065	8.69376	7.87275	8.26024	7.56834	6.24073	5.39353	5.66511	7.85705	6.00859	7.23649	8.01182	7.67939	4.15652	6.31454	6.53246	8.40846	5.00459	9.22843	10.4947	7.20504	6.9657	8.52596	6.39386	6.06	8.37177	7.09433	6.58716	5.66685	5.78793	8.39487	6.90745	7.87678	7.1684	5.39598	4.63541	9.24327	6.54233	6.6149	6.85173	6.01653	4.77397	6.65763	4.23593	5.10871	6.54234	5.64079	5.57529	6.68488
HTA2-neg-47420934_st	5.36381	4.04613	5.21256	4.99457	4.76325	5.27363	4.13768	4.71912	5.54432	3.65112	4.27336	4.12765	3.91394	3.24213	4.64368	4.33128	3.86492	4.78375	4.354	5.29767	4.04111	3.81448	5.58181	4.65512	4.03945	4.51589	4.04157	4.93717	5.27523	4.10136	4.92912	2.84215	3.39366	4.28264	4.26464	4.86948	4.53442	4.04402	4.92021	4.41515	3.47703	3.94212	3.86882	5.26815	5.18129	3.84765	4.34375	3.46781	4.6167
HTA2-neg-47420940_st	7.03422	5.92386	5.31769	3.94483	5.56504	7.52372	7.10202	5.37195	7.23114	4.88273	6.69873	5.06623	6.30731	4.6813	4.03082	6.47399	4.84761	3.13374	6.34402	3.61189	5.07644	6.01008	6.11551	5.62951	4.97663	4.81983	4.82902	7.88755	4.6815	4.94907	5.83443	5.89986	5.75094	3.86449	4.00076	5.29524	5.58163	5.29042	5.22978	5.9999	6.43305	4.53996	3.76188	6.10188	5.51803	5.37046	6.61189	6.1013	4.53565
HTA2-neg-47420966_st	3.28473	4.29711	4.23379	3.57742	4.22295	4.02078	3.45015	4.67153	3.32558	4.00435	3.7438	3.91096	5.02999	3.29109	2.62244	3.4062	3.10273	3.93532	4.46134	5.02084	5.65627	3.61146	3.07302	3.42471	3.97243	4.44411	3.7661	5.31202	3.51032	4.77626	3.10384	3.86576	2.91088	2.94282	3.59535	3.89732	2.85803	3.38781	2.72675	3.27201	2.95554	4.02751	4.6068	3.90951	3.39201	2.71147	3.89504	3.50358	2.56659
HTA2-neg-47420981_st	3.86338	3.17427	3.3056	2.78371	5.30912	4.73914	4.83857	2.9402	3.14851	2.90756	4.12202	3.10209	3.13268	4.36797	3.66193	3.2188	3.21496	3.45583	4.70777	5.91615	3.82084	5.78612	4.12966	2.60352	2.57868	5.81108	3.39814	4.61432	5.38518	2.89537	3.26364	3.06856	4.51901	3.21384	3.06874	5.07411	4.8373	4.75746	3.81978	2.74888	4.42564	2.88272	3.0837	4.351	4.92172	3.7236	3.11246	3.52727	4.71752
HTA2-neg-47420982_st	5.59638	3.84418	4.12836	4.10999	6.04472	4.80775	4.50451	4.62983	5.46061	4.60368	4.03561	4.84804	3.89202	4.0584	4.25885	5.0528	6.08658	4.57285	5.33939	6.40227	4.52105	3.99099	5.42703	5.18054	5.55593	5.26358	5.93438	6.39512	5.43946	5.05987	5.60339	4.72982	5.30162	3.60902	5.27124	4.60806	5.16129	3.75581	4.61373	4.13214	3.2474	3.64772	4.76715	3.96812	4.37747	4.83813	5.10465	3.60765	5.91099
HTA2-neg-47420988_st	5.30423	2.85553	4.37145	3.79726	2.97446	3.14367	3.58402	3.32024	3.10946	3.16539	2.52074	2.93227	3.36822	4.85347	3.22161	2.6999	4.04636	2.21154	3.95452	2.82917	4.05706	3.83918	3.49213	3.08758	3.03366	4.52233	2.35129	3.68804	2.12514	3.2088	3.10024	2.74219	3.65426	2.72863	3.95385	3.47652	2.4439	3.36689	3.38326	3.686	3.03783	3.41403	4.33275	3.68057	2.78162	2.90048	2.81367	4.70772	2.95819
HTA2-neg-47421001_st	4.3733	4.41379	3.13353	2.94972	5.05128	3.6897	2.94248	3.04639	3.00408	3.27002	3.3862	2.76526	2.45288	2.73115	3.44069	3.45603	5.8145	3.47625	5.0655	3.29037	2.52226	5.4326	4.00004	2.87402	2.87206	2.63123	3.41176	3.09109	2.99467	3.55872	4.58382	4.90388	3.87919	3.52776	3.25001	4.04689	3.72027	2.79893	3.01379	4.18203	3.81193	4.5551	3.76337	2.28384	4.07522	4.10554	2.83219	3.77396	3.25337
HTA2-neg-47421169_st	5.98891	6.1779	5.21659	4.88277	4.67136	6.09194	5.3468	5.32854	7.01716	5.54075	5.56361	5.18113	5.32767	4.96072	4.64522	5.96109	6.20699	5.06774	5.7793	7.33244	5.36317	5.6037	6.33064	7.16715	4.76588	6.93508	5.38062	5.90092	5.41582	4.96197	4.61007	4.76468	4.61741	4.34719	4.82594	3.81172	5.35474	5.01203	4.50245	4.50995	4.27192	3.73923	5.42898	3.97364	3.33478	3.45433	4.72894	4.27355	5.04621
HTA2-neg-47421172_st	3.75984	5.23779	5.57774	4.59683	6.06352	6.11878	4.29864	3.62533	6.41791	5.30848	5.84009	5.38727	6.48296	5.40256	5.07351	5.24878	6.04523	5.18409	6.04576	6.8412	4.98964	5.97307	6.73041	5.0938	4.78526	6.73905	6.13108	5.98441	6.09542	5.15274	5.73149	5.13073	4.48297	4.39751	6.35535	4.54728	5.03247	4.65539	5.18549	4.44853	4.67811	3.90324	4.30263	5.39027	4.84302	4.33303	6.06462	4.64475	5.88844
HTA2-neg-47421192_st	6.22028	7.33574	5.52858	6.28361	6.3707	5.14479	5.00479	5.00772	6.69968	6.20214	5.24548	7.87923	5.90933	4.75116	6.06644	5.79472	5.06227	4.88113	6.05802	6.64379	5.92068	4.89261	7.50571	4.72084	5.50399	7.65412	5.55191	5.95164	10.3322	5.28386	4.34402	4.56163	6.5722	4.12024	6.08895	5.29827	4.51072	4.98757	5.24323	5.69608	4.71558	5.36396	4.46887	4.89558	4.812	5.09879	5.00906	4.04078	4.89431
HTA2-neg-47421227_st	8.28539	5.64833	4.71189	2.9763	4.67348	7.66119	4.78066	5.31079	3.58073	4.81275	6.62987	5.87642	7.34711	4.30385	5.03096	6.5428	4.44007	4.15901	4.74402	3.59938	6.6355	4.89419	4.82872	7.20843	4.37774	4.9936	3.54062	6.25314	3.19007	4.44552	4.98175	5.06839	2.4153	3.40155	4.37647	2.58992	3.20355	3.0541	3.6969	4.20306	3.84253	4.18716	3.26756	6.07713	4.63553	3.87194	6.6572	5.2311	4.34848
HTA2-neg-47421241_st	4.94839	4.73563	3.8795	4.01629	5.62158	5.02415	4.15711	4.5664	5.89735	5.9873	3.70582	4.16324	4.3096	4.20245	3.70418	3.43907	4.28951	4.70885	3.66112	6.49814	5.51248	4.15767	5.29227	4.06665	3.88338	6.53693	3.94666	3.84191	4.79893	4.27102	5.3528	5.24722	3.46621	4.29088	5.74481	5.01155	4.82401	4.56098	3.47565	3.94094	3.90261	3.53548	3.94118	4.49929	5.90911	4.00148	3.96929	3.29786	4.88325
HTA2-neg-47421296_st	5.21173	2.35578	2.38164	3.30076	2.10945	2.24124	2.94248	4.43941	4.32275	2.99093	3.80183	3.10646	3.76683	3.58402	6.43467	2.56811	4.08678	3.32025	3.43857	3.62221	8.6366	6.56298	4.13649	3.08758	2.30402	4.04057	6.29555	2.75668	3.68415	3.97299	4.35124	2.91946	4.38525	2.37731	2.66377	2.55433	3.16432	3.54227	3.97204	2.31762	2.44954	3.58884	3.11375	3.27229	2.34925	4.81733	4.54402	5.06396	3.71917
HTA2-neg-47421298_st	3.68269	4.62832	4.19724	3.57156	3.57321	3.82745	3.75479	3.68941	5.02654	3.69377	2.43596	3.94719	4.30717	3.67351	3.70364	3.28889	3.95851	3.08597	5.41905	4.23219	3.97464	3.85728	4.65931	3.83666	4.44652	3.72814	3.6636	3.78086	5.44691	4.01324	2.6199	3.62088	4.59487	2.82108	3.65488	2.8578	4.05858	3.17825	3.74881	3.52366	2.83989	3.43852	2.43976	3.54004	3.10244	2.65066	2.91602	3.66846	3.15213
HTA2-neg-47421299_st	6.76237	6.56502	5.15018	5.57163	5.75627	6.39132	4.46692	4.94395	5.38577	5.07227	5.30829	5.98086	7.12587	5.26082	6.11932	6.91004	7.1617	4.53599	6.43056	7.53442	7.15676	6.65921	5.28771	4.6814	4.8042	6.52261	4.82109	6.30806	4.13515	6.01359	6.70216	5.9801	6.35495	4.48661	6.82638	5.25016	4.98848	5.44164	5.73917	4.53809	4.5098	4.93247	5.24524	4.83709	4.02068	4.78192	4.72888	4.82838	6.24911
HTA2-neg-47421342_st	6.76025	6.2963	8.43579	8.93399	7.09623	4.48501	5.96192	6.87962	11.3273	7.79723	8.26409	9.66109	7.48224	7.34729	7.88309	8.39576	6.64287	7.70875	9.10428	6.0756	10.2902	7.87608	8.8165	6.63359	8.98033	12.0338	6.53569	7.58137	9.57227	8.17315	4.56945	5.01595	5.0308	5.7288	6.14883	5.45072	5.7336	5.47825	5.47286	5.88296	4.22476	6.14529	6.09042	5.60832	5.02596	3.8677	5.76365	4.87259	4.77757
HTA2-neg-47421354_st	4.0777	4.14252	2.79422	5.01072	3.12055	4.15266	4.78066	4.66993	5.72152	3.89802	3.09917	5.41905	3.40757	4.04157	2.37294	3.59149	4.28038	3.44947	3.59083	5.75395	2.90415	4.28358	4.33475	3.95725	2.78196	3.12217	3.54171	3.3602	6.45907	3.08802	2.69425	2.34701	2.92457	2.69079	4.5365	2.94424	2.54179	3.8271	3.14066	3.23812	2.53216	2.7384	4.23659	3.28244	2.34925	3.31387	3.52838	2.52884	4.81733
HTA2-neg-47421373_st	6.14809	5.15941	5.03635	3.13225	6.05013	5.91721	4.1469	3.87329	5.63211	6.77349	4.28507	3.71861	4.36726	3.58402	4.08851	3.96732	5.40577	2.50073	3.96138	7.72172	4.4266	3.68106	5.58029	3.95725	3.63224	5.96377	4.80158	3.21706	5.20888	3.12569	3.85464	6.55809	4.93082	4.27086	3.48191	3.56191	6.33235	4.04722	3.60564	6.94213	5.92346	2.6282	3.53032	5.64397	4.87039	3.09092	6.0338	3.60024	3.77932
HTA2-neg-47421381_st	4.51773	4.7855	2.85624	1.99333	2.89709	4.26695	3.85856	2.9121	3.33118	3.53821	3.6606	2.67525	3.61635	3.95452	3.2493	3.43907	5.04949	3.57702	5.89577	4.40948	3.74173	2.42645	3.48828	2.08958	2.93892	3.88815	3.04072	2.99264	5.85866	3.84651	3.75904	2.60652	4.13385	2.76286	2.32548	3.0397	2.89153	3.45856	3.17876	2.7034	2.63393	2.50768	3.6749	4.29083	3.40689	2.40203	3.77434	3.4319	2.69176
HTA2-neg-47421387_st	9.51024	8.97297	6.98552	8.82269	8.6099	7.74288	7.33448	6.85829	9.76692	8.98078	7.84737	8.68447	7.86403	5.63933	6.24828	8.08788	6.50145	6.03283	10.2681	9.29049	8.78643	8.6292	10.725	6.16295	9.52173	8.63581	6.58616	8.8421	10.1162	8.1185	6.60282	5.49025	7.67808	7.288	7.83745	5.41387	8.87939	6.60324	8.04622	8.5288	6.56055	6.32635	5.95475	5.20549	8.49977	7.56195	8.63517	8.01639	8.34978
HTA2-neg-47421393_st	10.0262	10.4299	9.60971	9.7584	8.14182	7.14477	8.38745	6.22645	11.5526	9.79391	4.98753	6.1274	9.26877	6.00263	11.1698	7.11897	8.6261	6.66343	9.16226	12.9236	7.94763	8.15776	9.87763	8.29877	12.0419	9.06911	7.9689	7.45208	7.21596	7.10054	8.86915	7.9807	7.07503	9.45204	10.612	9.25193	8.76624	8.13337	7.4411	9.82031	4.87355	9.23502	8.58659	8.95712	7.44692	8.00463	7.54592	8.61012	10.0698
HTA2-neg-47421410_st	3.58967	3.43311	3.40643	3.20581	4.26056	3.19774	3.51544	3.07203	2.88061	4.42615	3.4974	3.50852	3.10092	2.46716	2.81112	3.21667	4.16073	2.77499	4.46849	3.46965	4.43017	2.86773	3.99788	3.07682	3.59463	4.09889	3.30907	3.36372	4.01792	3.24507	3.20578	3.88921	4.38902	3.037	3.3721	3.40718	2.92482	3.19897	3.2238	3.45201	2.9581	2.22367	2.54129	2.6104	3.63791	2.84555	2.97713	2.97946	2.83351
HTA2-neg-47421411_st	2.87793	2.7773	2.92787	3.11684	3.02668	2.83604	3.18331	2.56878	3.09414	2.81049	2.73822	2.85491	3.13648	2.95001	2.71082	2.42467	2.98385	2.47492	3.94731	3.48867	3.25299	2.78446	3.26325	3.09335	3.22039	2.71621	3.44965	4.02178	3.55377	2.2503	5.46011	2.87379	4.03103	2.37855	2.63677	2.59252	2.67394	2.58828	2.87933	2.89462	2.2579	3.37027	2.86541	3.17567	2.23178	2.68993	2.61921	2.41328	2.42081
HTA2-neg-47421447_st	5.55005	3.16182	4.54431	4.55658	2.47131	6.24297	6.02626	3.36565	6.12951	4.05321	4.28048	5.26048	6.13404	3.74932	5.20072	4.38778	5.62641	5.20304	5.37351	4.86412	3.71147	4.33589	4.42559	4.25916	4.23048	3.58137	4.50164	5.32027	5.15178	3.62918	3.73644	3.17158	4.96156	3.8971	5.76314	3.35986	3.69737	4.48526	5.15883	3.5539	2.87018	2.68477	2.82732	2.73058	3.46361	3.97604	3.75156	2.98826	3.34196
HTA2-neg-47421498_st	7.23487	7.23806	6.44877	5.06354	8.0654	6.45884	6.1786	4.98183	6.24916	5.25454	6.89728	6.8036	6.80817	5.24657	5.23045	6.10459	6.51056	6.57968	9.74587	6.61212	6.41235	6.8316	6.76052	6.08515	5.81847	5.94003	6.48978	7.18344	5.94739	6.4786	7.81211	5.41553	7.39036	6.22119	5.91578	4.92958	6.55382	5.364	6.89591	5.53349	4.36369	6.73629	5.1242	4.43063	3.61867	6.17431	5.98433	6.0656	7.32432
HTA2-neg-47421519_st	3.94154	4.13332	3.90577	4.04003	3.29302	3.68415	3.12977	4.24396	4.09951	4.55391	3.36423	3.30745	3.62741	2.9644	3.31843	3.85388	3.16877	3.39713	2.85702	4.54171	3.59301	3.72701	3.82842	4.2722	3.71822	3.71797	3.78184	3.73819	4.49158	4.31817	2.92854	2.89964	3.29902	3.04122	2.95272	2.60834	4.22204	3.1165	2.9305	3.38495	2.52178	2.61524	3.17384	2.98185	4.59134	3.89645	3.01237	4.51198	2.85722
HTA2-neg-47421529_st	5.41941	5.26785	4.96809	4.97704	5.13646	4.6849	4.5278	4.53696	5.90144	5.54667	4.24407	5.28463	5.56812	4.23808	4.0627	6.98812	5.85469	3.84939	6.58546	8.09721	5.42453	5.43462	5.91993	4.20131	4.82368	6.49274	4.86182	5.54238	5.25068	4.96302	4.26012	5.356	4.44558	3.60241	4.94615	3.46391	4.67198	4.49552	4.73899	4.43223	4.00163	3.07612	2.76044	3.09483	3.89337	3.81764	4.58778	4.59434	4.43549
HTA2-neg-47421561_st	4.54637	5.55817	4.99439	3.85407	5.29462	5.15867	4.4399	4.19927	4.17631	4.99166	4.15159	4.35905	3.13846	3.81023	5.06865	5.11067	4.8383	5.67318	4.84071	7.30456	5.67984	4.70523	6.64409	4.2036	3.81611	4.43472	4.69816	4.05421	3.75838	5.16181	4.89129	5.84552	4.85699	3.28262	5.09572	4.66508	5.50364	2.88011	4.60488	4.54079	2.85304	4.5526	2.12021	3.85759	4.0698	5.10599	4.38823	4.20017	5.02915
HTA2-neg-47421597_st	4.52021	3.12376	4.63807	2.63969	4.62454	2.59858	2.77283	3.3313	3.35912	2.84259	2.99301	3.44945	2.22815	2.98508	3.24592	3.40881	3.31723	2.76654	3.28853	2.41396	4.30546	2.64184	2.52439	3.14466	2.87989	2.3803	3.70904	2.51935	3.66414	2.82252	3.09381	3.97079	2.45727	3.76554	3.91698	3.04721	3.83571	2.6252	3.17627	3.5376	3.54856	2.76311	3.25851	3.02662	2.99612	3.80172	3.37671	3.37957	2.8082
HTA2-neg-47421617_st	3.29669	3.63088	2.50481	4.54928	6.22238	6.0595	5.64863	2.8658	3.95678	3.63474	3.62033	3.70059	4.50736	3.38395	3.42113	3.65331	4.88187	3.9148	2.83816	5.30342	2.88144	2.70719	4.74986	4.17295	4.91326	4.08539	3.62016	5.55249	3.92296	2.94496	5.30865	2.60323	4.46234	4.80419	4.92791	3.1718	4.67905	4.48186	3.19447	5.74933	3.12236	2.63513	4.5996	3.39246	2.85818	2.32308	3.26807	3.99145	6.10922
HTA2-neg-47421633_st	4.27301	3.6461	3.5231	4.00792	3.9951	3.79693	3.54445	3.36765	3.90095	3.58691	4.60959	3.5681	2.76518	2.78411	2.96664	3.42919	4.44808	2.94903	4.92084	4.48508	4.03787	4.48561	3.71778	4.29128	4.19057	3.31874	3.95664	3.89342	4.10071	3.36758	6.32466	3.89211	3.38184	2.50305	3.69185	2.38298	3.05402	2.9185	3.17889	3.5165	3.58286	3.11506	3.84145	3.23761	3.38476	3.85328	3.66789	3.12446	3.16123
HTA2-neg-47421635_st	4.29638	4.35367	4.74451	4.96484	4.34852	5.0004	3.97232	4.2821	4.71486	4.41458	4.71731	5.25782	4.31553	3.55623	4.27773	4.90174	5.49045	4.37194	7.01266	6.12408	6.2866	3.98779	4.62463	4.7946	3.7844	3.50442	4.03376	4.28539	6.37258	4.59199	5.87826	4.48579	4.72205	4.3227	4.88121	3.81568	5.78663	4.93571	3.6687	4.19755	3.98837	3.45706	4.8873	4.3313	3.21904	2.2664	5.57	4.6014	4.10213
HTA2-neg-47421638_st	5.12511	3.96297	5.25726	3.77903	4.12127	4.88046	5.40406	4.55956	5.27877	3.54613	3.76657	4.45178	4.62697	3.42802	3.65351	4.25885	4.01383	4.26505	5.26807	12.4222	4.3323	4.24313	4.29958	3.76699	5.30232	4.60561	3.42179	5.22065	4.73035	2.97332	2.77704	3.88442	3.85017	3.15249	4.3296	3.58518	4.98123	3.16553	3.50285	3.48571	3.84168	3.16281	3.86824	4.33333	3.70106	4.64743	3.52754	4.35313	4.22785
HTA2-neg-47421639_st	4.34662	4.64116	4.06663	4.60417	3.83602	3.08722	3.50442	4.08838	5.35773	4.04072	4.33059	3.45253	5.7856	3.31528	3.71871	4.91265	3.9693	4.35882	3.99971	4.13851	6.97636	3.58731	4.06513	5.09166	4.47449	3.81392	5.59059	4.45018	3.5205	4.32289	2.68581	5.00674	3.6487	3.83654	4.61706	4.90248	5.64951	3.92676	4.07454	4.05297	4.25104	4.43485	5.07486	4.56004	4.48447	4.10579	3.78418	4.06305	4.39591
HTA2-neg-47421642_st	3.61635	4.48048	3.53306	4.01692	5.70639	3.7848	2.75817	4.79343	4.34853	6.03464	2.81068	4.05363	4.02222	2.96338	3.67223	2.27236	2.80914	3.67993	5.29441	8.16392	3.01507	3.03438	3.78696	3.30294	3.37229	3.74464	3.16554	4.87366	3.84449	3.12304	4.48828	5.78548	3.82802	3.678	4.79806	3.56191	3.35849	3.8271	3.52819	3.45829	3.33407	3.66915	2.96889	2.40085	2.90048	2.44563	2.92872	2.83392	2.03478
HTA2-neg-47421730_st	6.986	6.6366	5.27995	5.47172	5.42902	5.81118	5.38209	4.20672	5.53806	4.91583	5.69531	5.54062	5.39505	4.41397	4.35688	4.73549	5.8312	6.83173	6.05364	6.67286	5.33208	5.53899	5.5184	4.87397	5.19013	6.13139	4.80976	6.58511	7.49689	5.76103	5.04241	4.20601	4.07065	5.08705	4.18296	4.33513	6.12533	4.47911	6.04276	5.77801	5.05571	4.69548	5.61227	5.63573	4.38288	5.99131	6.27946	5.02096	5.36398
HTA2-neg-47421748_st	8.0182	8.08074	7.8825	5.87872	7.38595	5.91721	7.45608	7.42307	6.57803	7.61346	6.30874	4.65168	7.02034	5.17057	6.88115	8.27897	9.3414	6.23646	2.85638	6.8825	9.33761	5.7623	5.26872	5.90754	5.26872	8.28507	5.80569	4.79522	8.16556	6.2861	6.34221	5.55059	2.76952	6.70763	5.29687	6.23187	5.51865	4.78714	5.15647	8.22689	5.73666	4.82621	8.36795	6.54044	6.60904	6.42703	7.49217	7.66968	7.50665
HTA2-neg-47421751_st	5.86606	3.57059	5.13153	4.04764	4.09593	3.43329	5.42946	3.59031	4.91081	3.68109	2.935	4.72248	4.87379	3.49604	4.30251	3.76969	4.28665	3.20847	4.58931	4.98373	4.05227	3.8867	4.52209	4.01319	5.00758	4.67216	5.24364	4.59731	4.41054	4.22396	5.58559	3.78744	5.98326	4.30242	5.72935	5.05637	3.81689	4.07146	4.8729	3.58602	3.22271	3.00542	4.66008	6.47757	2.91891	3.60528	4.27764	4.3901	4.67642
HTA2-neg-47421759_st	4.90943	4.71038	3.00801	3.38941	3.08029	2.82482	2.7885	2.77135	4.38184	3.71059	4.1704	5.16082	3.62726	3.61585	3.94577	5.05112	3.36169	4.32453	5.59156	3.38469	2.99978	4.18759	4.78999	4.37952	4.4481	3.77787	4.22341	4.29662	3.66501	4.43231	4.55249	3.13227	3.01681	4.48661	2.77458	3.04049	4.73094	2.66655	2.97973	3.95888	3.17746	3.80894	4.3164	3.3231	3.05021	3.76965	3.88846	3.55627	5.3412
HTA2-neg-47421822_st	6.90063	8.10688	7.01167	6.84505	6.95014	5.46649	6.90418	6.45933	6.8825	6.3889	5.47245	6.88075	6.88278	4.82154	5.76106	5.33254	8.10749	5.57933	8.94417	7.09399	7.74948	7.54706	8.30849	5.71121	6.63945	7.67669	7.21811	5.82003	7.51178	5.98377	7.13053	6.51937	6.36964	6.44865	7.62011	5.36482	8.5486	5.53577	7.79235	5.37344	7.21846	6.40542	5.53724	5.99767	6.73886	7.41934	6.28613	6.21799	6.72944
HTA2-neg-47421829_st	6.07941	8.45945	4.59279	4.00106	5.85069	5.99289	5.49239	5.23492	6.98132	6.33407	4.18791	5.37834	5.71614	4.72672	5.88637	5.35139	5.21435	5.80623	6.85828	7.90622	6.03534	6.04036	6.76423	4.21468	5.45644	7.75828	5.10554	5.7379	3.86594	5.14401	4.18429	6.24899	5.86467	3.46814	4.69745	4.80968	8.33578	4.30896	5.83582	4.56425	5.22834	5.04183	7.85742	4.06007	4.56414	4.20943	7.61319	5.87694	4.99724
HTA2-neg-47421854_st	4.44183	4.26184	4.40383	4.96613	4.23948	6.20826	4.01399	4.35601	4.94415	6.82141	4.26886	3.82212	4.40948	3.62365	4.20821	5.20206	4.72982	5.76657	5.8554	5.8764	5.43515	4.59591	5.88627	5.67682	4.59445	5.83863	4.19164	5.46496	3.74022	4.82226	4.73134	4.32363	5.22579	5.21623	4.55253	4.71859	3.79698	4.01624	4.61389	3.88584	3.56072	4.72089	3.82494	4.01948	3.89385	3.57334	4.19154	5.15795	3.36019
HTA2-neg-47421855_st	5.24207	5.36503	3.66887	6.35763	5.59439	5.97833	5.75448	2.47903	8.83847	4.56679	5.73041	4.95257	4.48826	4.52192	3.43258	5.74932	4.76453	4.0777	4.4834	7.87608	6.5982	6.19752	6.54888	5.33892	3.57701	6.24044	6.64634	7.10226	4.88932	5.13439	4.48828	3.83876	4.84546	6.132	3.6431	2.86929	3.96617	4.48808	4.44185	4.81576	6.01542	4.27748	4.46131	3.88969	5.73422	3.31387	5.55366	4.26325	5.54554
HTA2-neg-47421856_st	4.87816	6.08812	7.92164	7.17183	7.57873	5.69023	6.13563	6.07318	4.551	7.27277	6.37948	7.06222	8.7724	2.7692	5.72239	7.37209	7.80081	5.58448	7.75484	6.53678	6.37434	3.11356	8.21736	5.589	4.13108	9.1381	3.86508	7.01302	4.42675	7.14126	4.12232	6.75333	5.7383	4.26715	5.41336	3.34118	3.91283	7.31355	6.11739	6.44063	2.29922	6.97599	6.51069	4.4654	4.52592	3.31387	5.72025	4.90628	3.92611
HTA2-neg-47421889_st	5.01938	3.96429	5.52584	5.10957	3.96481	4.62488	4.66883	3.85421	4.3226	6.57898	3.74036	4.90829	4.67475	4.17951	4.46129	5.94004	6.39595	5.52789	5.70987	4.24076	4.69956	4.73312	5.23153	5.41028	6.00026	4.38043	5.63973	4.57141	2.93931	4.87457	5.27756	5.82613	4.18939	5.10869	5.77529	4.58366	3.97824	3.30408	4.84055	4.37681	6.253	5.22032	4.2884	4.08957	5.87642	3.58972	4.50667	4.19403	5.36655
HTA2-neg-47421950_st	3.56916	3.8995	2.96914	4.28703	3.35734	3.76863	3.84779	4.3945	3.48347	3.56366	3.61612	2.7923	3.59694	3.37674	2.84751	4.45447	3.62488	2.78405	3.45358	4.24684	3.72987	3.77977	3.61197	4.70186	3.11453	3.79462	3.87918	3.3072	4.76498	2.82289	4.142	4.20616	3.06885	2.42812	4.58148	4.20301	2.61552	4.10536	3.13261	3.20677	2.28074	2.72109	2.76911	2.41813	2.74169	2.80839	2.8477	2.7207	3.04879
HTA2-neg-47421976_st	6.70378	8.73887	6.28488	6.8439	5.21068	7.15785	6.38763	3.39678	9.80315	9.20609	7.55476	8.08482	8.30751	4.45588	4.59349	7.59275	6.46291	3.65395	11.7882	10.5286	9.71261	6.99845	9.47179	6.30435	8.64971	6.04192	6.02365	8.30124	5.199	8.42506	7.12018	5.47937	4.96547	5.13851	6.16598	5.27987	9.21908	4.27824	7.16474	4.72203	5.78738	4.39108	5.65422	7.11905	5.89903	4.99293	7.3368	6.1506	9.09557
HTA2-neg-47421989_st	8.21515	6.66332	6.33882	7.90854	6.55714	7.074	6.02302	5.95742	7.69367	6.94729	7.03505	6.7024	7.39299	6.03482	6.70954	7.9584	7.24412	6.48218	7.47519	8.77832	7.91353	5.18913	8.49705	7.60692	7.28291	7.49418	6.58818	7.92501	7.90893	7.60127	6.50809	7.97686	8.06845	7.04636	7.01474	6.18981	7.76869	7.17706	7.28935	6.73514	5.51293	5.50868	5.78109	7.22389	6.00014	4.95862	7.03418	6.12644	7.70173
HTA2-neg-47422012_st	6.37517	3.11924	3.62346	7.50993	2.23406	4.76574	6.56227	4.33475	4.28223	5.73371	3.80183	4.3	6.46257	6.58908	5.19395	5.28054	4.89131	2.95897	2.85638	3.68415	6.84986	2.66034	5.26872	3.59149	3.19286	5.05571	8.26126	7.05892	3.84449	3.53645	3.52838	5.47825	5.99206	3.678	8.66718	7.10696	5.8609	5.91151	5.8534	4.76337	1.92583	7.27287	2.67008	3.28244	6.85555	4.18716	2.59028	5.88938	7.984
HTA2-neg-47422014_st	7.6401	13.6946	12.0663	10.7756	11.5276	6.33545	9.53123	12.6874	2.98958	13.7756	14.5784	4.87399	6.46257	11.14	10.9705	4.04399	4.89131	13.3921	5.29441	7.99021	10.5287	9.43698	11.5068	8.52598	9.33221	5.85574	14.1248	13.032	11.9546	9.60742	11.2003	3.47425	2.52138	7.80049	7.43922	11.8117	5.77719	3.39449	4.05858	10.5481	6.04554	6.4423	10.0337	6.74214	6.42221	3.58972	12.1615	7.44949	10.007
HTA2-neg-47422021_st	4.90537	4.72756	4.70129	4.24272	5.08315	4.37161	3.89603	4.78443	3.94719	4.78715	4.58091	4.90959	4.82421	3.63867	3.63887	4.4682	4.4694	3.8159	6.07223	4.54373	3.91841	4.91651	5.54916	3.9236	4.19538	7.04359	4.22495	3.49085	3.59721	4.16788	5.92771	6.15774	4.97565	3.0576	3.82841	3.63078	3.29413	3.97791	3.94003	3.24079	3.97368	4.01541	4.84529	2.46864	2.65339	4.27673	5.5081	4.18972	3.16583
HTA2-neg-47422029_st	5.58029	3.75665	4.34137	4.54958	5.49492	4.15724	4.63611	4.89403	5.33174	3.95101	5.81161	5.02925	3.47108	4.19265	3.74825	4.56559	5.02654	3.89379	5.02391	4.13427	4.06933	4.71956	4.83089	3.9738	4.34604	3.74464	3.77272	4.22639	2.91754	4.93497	4.97634	4.8713	4.44195	3.88116	5.494	4.71898	4.4844	5.47658	4.993	4.63343	6.33772	3.79466	4.1484	4.54698	5.53512	4.74783	5.37692	4.72559	4.58452
HTA2-neg-47422037_st	5.03397	3.35432	6.8934	4.91363	3.17468	3.73331	5.4587	3.98072	5.2143	4.4307	4.53053	4.87399	5.71371	4.98234	3.03235	5.89528	4.58338	3.32302	3.77016	5.4587	5.75345	6.11318	3.61702	4.97875	4.5578	4.49026	5.16563	3.93403	7.5109	4.81229	6.07747	2.32647	5.25076	3.96428	4.15746	4.79777	3.42727	3.35303	4.59487	4.35997	3.55167	3.57027	6.36546	4.4775	6.48682	2.79634	4.42465	2.63231	6.09924
HTA2-neg-47422040_st	7.00065	4.98617	4.98246	5.50334	3.79514	5.651	3.8013	4.70478	5.93436	5.41025	5.45115	4.64542	5.27564	4.64739	4.63738	5.10993	5.53747	5.58122	4.06761	5.36044	5.54313	4.23357	4.5279	6.10776	5.76232	6.82583	5.22542	5.78677	5.92033	4.73529	4.66666	2.96811	5.06109	3.7425	3.64454	3.17567	5.08634	3.34005	4.66114	3.41639	4.26797	6.08437	3.29015	3.0477	2.44644	4.16468	4.48655	4.27162	4.31557
HTA2-neg-47422060_st	4.3617	4.74361	5.68259	4.16105	4.12986	7.36732	4.28479	2.95017	3.5388	2.63332	3.82119	5.29239	3.38266	3.07544	4.22008	4.96179	3.57724	3.87816	4.1164	3.45902	4.06514	4.02945	3.27133	4.49827	3.28838	3.37928	3.30614	4.07992	5.1446	5.70176	4.17576	3.29644	3.30421	4.54324	2.34215	4.336	2.72711	3.40508	2.91813	2.31389	2.10235	3.56035	3.38175	3.2902	2.60137	2.86245	4.22336	4.79415	2.40516
HTA2-neg-47422078_st	3.53479	3.51405	3.23189	3.92797	3.4457	2.79976	2.81916	3.47882	3.49111	3.90762	3.05447	2.36288	3.19309	3.08381	3.23233	3.14249	4.21634	3.69826	2.90586	5.07302	3.36758	3.49593	3.30005	4.08387	3.55363	3.2128	3.5088	3.6576	2.31397	2.63316	2.81739	3.09283	3.54703	2.30217	3.6015	2.29958	3.6386	2.61263	2.986	2.7913	2.34235	2.3389	3.59848	2.26861	3.4066	2.60212	2.7343	2.89407	3.41069
HTA2-neg-47422080_st	5.86072	4.379	3.87141	4.07641	5.29907	4.01892	5.91124	3.9445	5.3142	4.39576	3.50236	5.66041	5.29096	3.85431	3.25792	5.08512	5.4889	4.78457	4.69722	4.90876	5.76351	4.96781	6.56051	4.57172	4.85272	5.92377	6.39247	4.98689	6.46792	4.29259	2.89176	4.96873	4.9677	4.65348	4.62536	4.16106	4.3826	3.32524	3.35348	3.94741	3.59361	4.95361	5.10309	4.33223	3.61896	3.88919	3.97651	3.4408	3.50124
HTA2-neg-47422083_st	2.36157	5.07103	2.79422	3.7199	3.96566	6.19022	2.27438	5.41382	5.02654	2.78887	5.25384	4.65168	3.19987	3.19987	3.2493	2.99853	6.31041	4.82872	4.874	5.30118	6.50996	3.98754	3.2563	6.59511	3.63224	2.48529	4.94608	3.93403	3.01661	6.94563	3.35056	3.06856	4.38525	4.51679	2.5805	2.69159	2.72576	4.78714	4.89066	2.83078	3.44113	3.26113	4.04136	2.33574	4.52592	4.04557	5.25255	3.54911	3.58888
HTA2-neg-47422085_st	3.86313	2.46775	4.61516	5.07322	3.11597	2.83531	5.21703	3.30784	4.44604	3.81411	4.85929	2.63237	4.86389	3.33828	2.63111	3.48993	3.39774	3.64389	4.81854	5.36695	5.26058	3.18331	4.22287	4.31259	2.68925	4.5091	3.35626	2.69187	2.44633	4.13208	4.37171	4.12247	4.38781	5.00292	4.94933	4.25176	3.42232	4.3144	3.46319	3.64663	3.84997	2.96786	5.36361	5.05991	3.75628	3.52811	3.39743	3.29769	3.28761
HTA2-neg-47422090_st	9.15249	7.83301	6.77835	6.24188	7.58605	6.86916	6.51073	5.52117	7.17619	6.71242	6.45421	6.80392	8.13102	5.13102	5.85857	6.17958	7.90706	5.74848	9.9748	7.83659	8.14422	7.66942	6.74327	5.39679	7.48296	8.10464	6.32042	6.32432	7.97519	6.43146	7.26783	4.88281	7.66383	4.9229	5.22007	5.189	7.00666	5.50603	5.66056	4.92489	6.50121	6.01098	6.88528	5.5775	5.82483	5.19926	5.96148	5.74756	8.21123
HTA2-neg-47422093_st	3.7838	4.17416	6.32312	4.14828	4.55294	3.94778	3.98822	4.16357	5.41707	4.52764	3.32328	4.91667	4.42527	3.72609	3.80178	4.02787	4.00265	4.07349	8.84949	5.67675	4.65713	3.97528	4.66259	4.00165	4.23906	4.63585	3.64719	4.53538	4.37553	4.38029	3.8209	3.59495	3.19288	3.35479	3.37796	3.02426	4.14068	4.03875	4.84295	3.0469	2.93119	3.00854	3.30797	2.5942	3.7757	3.17064	3.34399	3.77686	3.71443
HTA2-neg-47422095_st	4.90707	5.20253	5.03361	4.10726	5.43679	4.53684	3.4565	3.88144	5.36401	3.76366	3.42583	4.45361	4.8779	3.33444	4.00825	3.69556	5.14183	3.67057	5.3474	3.23126	4.39259	4.51338	4.61222	3.92915	4.18479	4.90366	3.77091	4.02272	3.83624	4.82315	3.63288	4.13123	3.96941	3.32408	3.9614	3.20886	4.19334	3.35459	3.29773	2.97219	2.55311	3.18223	4.13575	3.41679	2.64854	2.32012	3.65728	3.67669	3.32846
HTA2-neg-47422105_st	4.13231	4.19543	5.27522	4.92627	5.63576	4.69857	4.40441	4.15363	4.30468	4.12893	4.51867	4.80621	3.62028	3.35862	3.64154	4.27916	4.87909	3.43212	4.33823	4.3212	4.46836	4.07434	4.13202	4.62379	5.30862	4.13443	4.77561	4.27651	4.48408	3.07269	5.05956	3.01345	3.69178	3.80371	3.29339	2.74918	3.50286	3.89505	3.87266	3.0506	3.95361	2.71823	5.27691	4.01702	2.63836	3.03736	5.27809	4.41448	4.55485
HTA2-neg-47422120_st	6.79683	5.66558	6.78322	8.64491	7.20286	9.02954	7.3329	7.29505	10.1974	7.51669	8.99424	7.85924	8.47245	8.15831	7.8598	9.76291	5.40041	5.30026	6.28167	7.15135	9.73921	6.4665	10.2548	4.74116	7.50708	6.77489	5.00994	10.5861	7.34561	6.68269	2.93688	7.80405	6.10646	5.07178	10.5055	6.05157	9.55317	6.08687	8.84705	8.35918	5.75327	8.8487	5.00185	5.73127	6.33198	6.04814	4.13936	6.99087	7.8251
HTA2-neg-47422171_st	5.72782	4.38514	3.40899	4.02797	4.46245	4.06469	4.72402	4.15694	5.58622	2.7997	2.89087	3.86646	3.63834	4.13865	3.52333	3.72368	3.24949	4.25834	2.96579	3.4105	3.64029	6.25354	5.31583	6.69603	4.21704	6.64537	3.69617	4.5997	7.2404	3.83887	3.21039	4.86722	2.54961	3.1909	3.45486	3.06949	4.43379	3.06493	3.83211	3.70977	3.45861	3.15989	4.40931	3.4109	3.02959	3.14185	3.06793	3.58415	2.67933
HTA2-neg-47422186_st	5.54779	3.80851	4.47129	4.06669	3.11374	3.27813	4.81114	4.03221	5.39857	3.55883	4.70983	3.45939	4.25041	3.93278	4.52157	3.5398	5.007	2.98163	4.34434	4.93005	3.75277	3.21918	5.97736	4.01827	3.0298	4.03648	3.56012	3.99638	4.24337	4.19808	3.05046	2.67413	2.68262	4.16026	4.12814	3.16542	2.95124	3.07325	3.13255	3.12454	2.82105	2.66252	3.52044	4.64075	2.74061	2.83563	3.29912	2.86225	3.99438
HTA2-neg-47422203_st	5.12354	3.58769	2.43698	3.32195	5.21223	2.60165	2.43575	2.42068	3.19399	2.77092	4.29663	2.54443	4.5707	2.38294	2.81221	4.04811	2.60617	3.89801	4.0913	2.55177	4.4256	2.81023	3.82901	4.50073	3.80712	3.53483	2.78196	3.37579	4.65135	2.33724	2.51981	4.32135	4.20266	2.3323	3.43953	2.41646	4.17042	2.4206	3.24731	3.16331	3.34422	3.08846	3.73824	3.08966	2.90048	2.83103	2.5418	2.09516	3.22829
HTA2-neg-47422232_st	10.1571	11.5306	9.77264	8.95335	10.7662	8.78216	10.0587	9.83149	9.38897	9.98317	7.45205	9.62227	8.92099	7.09765	8.86912	7.70528	12.141	8.39205	10.1448	11.2114	8.68517	10.3462	10.6137	7.47735	10.7418	9.50866	9.74695	8.8645	9.01195	8.37138	10.0163	10.1301	11.3182	8.55269	9.12503	6.95967	10.9355	7.32672	10.894	6.88596	9.81357	8.2376	10.1012	8.07791	7.96448	8.26911	10.6489	7.64234	10.6383
HTA2-neg-47422236_st	9.6666	10.1116	11.2936	9.09761	9.15717	8.56311	8.2238	7.52949	9.10788	9.06806	7.7825	8.63032	9.99108	6.95365	8.9193	8.35037	11.6587	7.13673	12.0495	10.6096	9.16524	9.57056	10.3818	8.27158	9.86184	8.51986	8.71671	9.21067	9.85088	9.80263	11.7919	8.2246	11.7167	8.10912	9.75382	7.60692	10.3681	7.90423	9.30215	7.99637	7.63946	9.14889	8.36915	8.61562	9.07105	9.15592	8.58152	10.0813	11.7882
HTA2-neg-47422238_st	3.00652	3.71484	3.58679	2.94221	2.92105	3.40622	3.28481	3.06764	2.87738	3.37974	7.14276	3.26298	3.00892	2.67294	3.42181	3.59668	4.27313	3.61747	3.76816	3.63515	2.65529	3.47537	3.68894	3.0816	4.19481	3.34205	2.89455	4.38947	3.01883	3.86725	2.73956	3.53875	4.15314	3.35911	3.4556	3.07025	4.04722	3.0934	3.38578	2.84059	2.54601	2.95834	2.39806	3.7374	2.89174	3.44502	3.03318	2.69053	2.65854
HTA2-neg-47422248_st	3.19674	3.20847	3.57394	4.27979	3.18351	3.89292	3.39418	3.65617	4.09319	2.53239	3.57702	3.02604	2.59699	2.99747	3.1661	3.43427	3.02446	3.20754	2.77571	2.67379	4.70354	4.91921	4.65373	3.74218	2.97669	4.83608	3.45382	3.1312	5.00418	3.89549	5.32935	2.93066	3.43603	3.21461	4.60518	3.89087	2.74509	2.67664	2.66435	4.82035	3.32453	3.26653	5.41645	4.51257	4.07664	4.60921	3.58172	3.00688	3.37791
HTA2-neg-47422251_st	5.71312	4.48968	4.05694	4.83084	7.95931	3.60834	3.98453	4.22189	3.7559	3.21317	3.48283	4.37876	4.30005	2.46239	4.28512	5.21085	4.66841	3.59465	6.77193	5.87055	5.023	4.18743	4.95838	3.74843	5.74875	4.53831	4.16385	3.64837	4.55682	4.13884	5.61977	5.67096	6.2675	6.71166	3.44547	4.08373	5.62887	3.1717	4.36974	3.46007	4.35281	4.23291	5.00274	3.45683	3.18154	5.85609	5.74923	4.93207	4.36325
HTA2-neg-47422252_st	10.5411	7.69055	6.10459	6.40938	4.76043	8.65827	8.11182	6.41131	7.47288	7.53406	6.56599	6.98696	6.666	6.02548	5.97267	5.93966	9.45135	8.10533	11.5432	6.10858	8.52983	6.92009	9.92855	5.73919	7.56133	8.45438	5.31518	7.73576	8.40181	5.61991	6.7227	7.63549	6.10691	5.96048	6.31051	5.5925	7.18037	5.06716	4.50012	5.22564	6.54499	7.27502	4.47523	7.25067	5.31794	6.72667	7.20771	6.31932	7.6101
HTA2-neg-47422253_st	3.66253	2.94815	3.88951	5.09034	9.97461	4.32961	3.42882	5.23823	4.39547	4.67967	9.73728	5.94639	3.1678	2.4763	4.26885	3.20186	4.05464	4.88189	3.82814	4.66993	3.44064	7.62527	3.62083	3.10691	3.18486	4.04899	3.15081	4.41362	2.91884	3.69299	10.3573	4.98845	7.34061	4.33225	3.43953	3.89268	6.33901	4.89284	4.86786	4.29579	4.74633	5.33906	5.75174	5.79916	4.04356	4.66393	4.9955	6.07903	9.56268
HTA2-neg-47422271_st	7.87083	8.19015	6.81612	7.81595	7.80739	7.28495	7.30058	6.71273	7.25302	7.43285	7.48823	7.63825	6.77768	6.96999	7.78946	8.82115	6.8675	7.47137	7.14407	7.36328	9.55423	7.94763	8.3424	7.44971	8.62703	8.28507	6.71578	8.3133	6.12265	7.04068	5.00225	2.80873	7.84431	3.47933	4.60645	3.15177	2.55454	3.78589	4.81866	4.05859	5.14021	4.97002	4.55445	4.24654	6.20597	4.81733	5.37692	5.26755	8.6994
HTA2-neg-47422272_st	6.57781	3.46395	3.62346	3.78989	6.23658	4.65932	5.21521	3.00323	5.23769	4.17045	2.84491	3.13645	5.41745	2.94809	2.51935	2.27236	6.53926	5.76242	3.41037	3.3183	2.7668	4.80006	2.91999	4.44039	3.25078	4.25591	3.04072	5.17614	2.66666	2.13506	3.00075	5.36268	6.98513	2.69009	2.9252	3.85197	2.30607	2.26345	3.0361	3.5814	2.97322	3.05103	3.12695	3.73827	3.62479	3.93336	2.49332	2.98841	2.73833
HTA2-neg-47422276_st	3.58602	3.80551	3.428	3.2542	4.22174	3.01788	3.15538	2.88384	3.66876	3.43141	3.42429	2.73839	3.00404	3.11335	3.15271	3.38379	3.87082	3.27441	2.94673	3.91991	2.61852	4.00985	3.19812	3.86026	3.05508	4.49908	3.4529	3.4551	3.0249	3.62379	3.36136	3.77789	4.00884	3.40388	3.96916	2.96132	3.15205	3.25989	3.41411	3.56807	2.90534	3.85121	3.58415	2.72631	2.71431	3.15279	2.95817	4.30904	2.44779
HTA2-neg-47422282_st	7.17967	6.3223	6.80313	3.58628	4.88733	4.92756	7.01909	4.77001	4.06967	5.06245	5.56861	5.35973	4.20516	4.45447	4.82005	4.5203	6.85834	3.79551	7.0612	5.58029	5.03145	5.86792	5.26872	5.50308	4.29896	11.1605	4.92291	3.3602	4.91625	5.5546	5.6947	3.33729	6.77584	3.32266	4.83721	3.94834	4.32769	4.01247	6.14694	3.16542	3.33493	3.18674	2.6214	4.77907	3.89651	4.43277	2.45724	3.5015	5.81304
HTA2-neg-47422308_st	3.76683	2.64679	3.35416	3.02569	3.58402	3.22982	3.12217	2.64161	3.09355	2.56616	3.64571	2.61409	2.62336	2.3232	2.42444	4.14865	2.95634	3.30079	3.04072	3.54922	2.70853	2.96195	3.32435	2.86779	2.39041	4.00733	2.50038	3.16873	2.85907	2.52145	2.45657	3.14066	3.16646	2.6448	4.75208	2.45581	4.2854	2.71599	2.99951	2.61953	2.88718	3.87669	3.14707	2.97731	2.9318	3.36719	3.13705	2.74903	2.62197
HTA2-neg-47422318_st	10.8762	8.8242	9.71012	7.31205	8.88944	8.50136	8.89659	7.66905	9.53697	8.07236	7.96859	8.56981	8.26747	6.27337	7.46002	7.75595	9.99851	7.86895	12.7252	10.5442	8.99294	10.1698	9.36113	7.48085	9.68615	8.84852	8.33485	8.95406	10.3495	8.10782	9.39028	8.23593	10.103	7.42906	8.2042	7.6133	10.0934	7.56954	8.8629	7.25329	7.66021	7.68699	7.55838	7.20038	6.84414	6.48421	7.71977	7.56823	9.60286
HTA2-neg-47422320_st	3.35975	4.62415	3.28699	4.46997	3.94282	2.84364	3.08958	3.125	3.19391	2.34016	3.36894	4.72087	4.05357	3.11067	3.62644	4.62549	4.96863	3.78893	5.06535	3.41997	3.35958	2.73405	4.75042	5.08382	4.37871	3.73158	3.36629	4.49012	3.60537	3.58904	3.02733	5.81703	5.08781	4.39942	4.953	5.05469	5.15698	4.82257	4.98644	5.14046	3.11958	3.65257	2.57594	3.02656	3.60565	3.19219	4.74649	4.50956	5.19077
HTA2-neg-47422321_st	5.33199	6.30286	3.27297	5.51437	5.2263	4.72924	4.54396	3.98468	4.56537	4.24033	4.39473	6.25588	7.04104	4.39403	6.08756	6.01204	5.35624	4.08419	5.71108	6.76145	5.81002	4.98157	6.77488	4.60508	5.95084	5.37351	5.42527	5.28338	5.93241	4.34661	4.69601	5.22659	5.91227	5.78434	3.85045	4.33845	5.96604	3.57666	4.59847	4.69481	3.16349	4.62677	5.03445	3.29554	5.59762	3.7313	4.73581	6.30642	5.01972
HTA2-neg-47422322_st	3.04917	4.83712	5.3439	3.54194	4.33751	4.047	4.27773	4.07988	3.81837	4.65963	4.33217	3.78524	3.38278	2.54718	2.94651	3.13029	3.95851	3.24801	4.02505	4.90941	5.62826	2.96733	4.53105	2.54902	3.04883	5.35565	3.41176	4.74443	4.20422	4.61147	5.32036	4.43701	4.09785	3.58055	3.73628	3.04917	2.86779	3.47112	3.50312	3.8009	2.81815	3.08954	3.34346	3.44721	3.31085	2.96184	3.73348	3.08624	4.26043
HTA2-neg-47422325_st	7.12196	4.09276	5.07555	6.50178	4.3727	3.06631	5.11632	3.80787	4.16327	5.62254	4.12135	5.35982	5.50405	3.99396	4.21627	4.19545	4.05267	4.21324	4.30847	4.28126	4.21888	3.89585	4.19545	4.25471	5.17704	4.33695	6.25367	4.39751	3.75346	5.74108	3.35056	4.19179	4.39501	5.27479	6.00013	3.72092	2.26794	3.94265	6.75333	2.66551	4.48052	4.35253	3.12695	3.72195	8.00447	5.97114	5.46309	3.31255	4.92179
HTA2-neg-47422326_st	3.67233	2.86785	3.08319	2.99817	3.79042	3.59208	2.99539	2.63066	3.75259	2.76149	3.05902	2.79252	2.87543	2.53641	2.89519	3.49305	3.62065	3.21302	3.34144	3.799	3.08937	4.53426	3.52651	3.03779	3.62232	2.98142	2.98356	3.4067	3.59248	3.50354	2.74762	3.18349	2.57488	4.00851	3.01421	2.61982	3.65397	2.75235	2.81222	2.72202	3.02744	3.68727	3.20526	2.78312	2.73729	2.14435	3.07713	2.7617	2.91286
HTA2-neg-47422327_st	5.62477	4.53704	4.45615	5.2312	5.43763	4.30497	5.09768	3.61592	5.2169	4.75624	4.41422	5.12944	4.68053	4.29102	5.37781	4.40901	4.91718	4.42992	7.86971	5.93744	5.62184	4.83786	5.99283	5.50519	4.79283	6.30792	5.23042	5.09223	5.90404	4.22593	5.92779	4.68173	4.23682	4.41941	4.69681	5.2788	5.22624	3.76698	5.26118	5.08978	4.25594	4.49829	4.65326	4.99053	3.54052	4.06724	4.2246	4.51864	5.59505
HTA2-neg-47422330_st	3.79193	4.07845	4.04162	3.56486	3.14649	4.58788	3.1216	3.53991	3.64266	3.40636	2.31593	3.85865	3.94987	3.93765	3.3802	4.1212	3.82673	3.49499	4.90259	3.18403	3.56129	3.38161	4.34821	3.36745	3.58516	4.29972	3.18216	3.76976	4.36306	4.33029	11.03	6.12318	7.32464	4.64971	5.08479	4.476	4.47942	4.19282	5.64612	4.20077	4.22968	4.5593	6.60095	3.711	4.76141	5.53473	5.67362	4.29749	7.26788
HTA2-neg-47422334_st	5.46328	5.63766	7.14293	5.40739	5.42493	5.74958	9.67686	5.07878	7.92071	5.60815	5.32514	5.58007	6.10695	5.39145	5.15434	5.82073	6.8706	5.03695	7.31706	7.46968	6.72539	5.83145	6.47884	4.96169	5.7766	5.79324	5.82662	6.83728	5.52282	5.21714	5.18465	5.50834	5.98423	5.55216	4.65257	4.41781	5.99906	6.1084	5.06177	4.27356	5.32541	3.63769	5.55107	3.80776	4.54583	4.79979	3.08184	4.36952	3.40526
HTA2-neg-47422335_st	7.49396	6.86265	10.2603	5.48622	5.28442	3.45028	5.47086	5.04721	4.38789	5.80987	4.33921	3.88584	6.26896	4.48818	4.7131	5.67792	5.62655	4.69965	5.11299	5.33059	4.83147	4.32027	5.31047	5.44331	4.83852	4.92145	4.66235	4.49406	5.20352	4.34304	4.00847	5.24835	7.02662	5.14548	4.41743	5.54123	5.11133	5.80546	5.70518	5.57036	4.93301	3.99853	6.78186	4.89455	4.54428	4.90944	5.9823	5.64298	3.88553
HTA2-neg-47422337_st	6.49904	8.9892	3.17562	5.87872	7.38595	5.33296	4.89131	2.16854	7.6648	7.43285	3.2129	3.49147	5.65313	3.58402	5.14262	5.74932	4.58338	5.24395	5.77117	7.36328	5.84705	5.11457	5.26872	2.80262	5.8894	6.32804	5.80569	3.68804	3.9902	4.80673	8.59612	5.07248	6.38819	7.48085	7.19112	5.8721	8.31635	2.74662	7.77585	2.74723	6.41815	5.38015	4.59144	6.36546	4.20673	6.62661	4.80746	5.66509	8.87926
HTA2-neg-47422342_st	3.84589	3.68641	3.22312	3.38098	4.22736	3.21691	2.91367	2.51478	3.98857	3.70004	2.89839	3.10492	3.72155	2.50919	2.59546	2.53749	4.53064	3.495	4.00482	2.87939	3.95908	3.0681	3.37318	4.01758	2.91069	3.41542	3.2797	3.06707	2.58734	3.25594	4.57491	3.00664	3.90712	2.55235	2.68596	2.73686	3.06673	2.43746	3.34666	3.25838	2.49833	2.40107	2.67241	2.58218	3.32305	3.93083	4.19316	3.18246	3.15597
HTA2-neg-47422344_st	4.39363	4.3689	5.03039	5.80947	5.53389	4.33197	4.13589	4.80632	5.73247	4.44833	3.77221	4.0807	5.09776	3.69795	3.28301	4.7561	3.80485	3.87174	5.92679	6.08467	3.61881	3.56356	6.05627	3.75767	4.38671	5.50565	4.15995	4.12958	4.44897	3.92932	4.48781	4.66966	6.35966	4.25827	4.20103	3.98839	6.7819	4.95861	5.34452	3.47495	3.66489	4.34178	3.32849	4.33817	4.80937	3.01768	4.73461	3.53417	4.68709
HTA2-neg-47422396_st	5.47026	5.7243	6.16545	5.88858	6.43111	5.88667	5.0004	5.29736	6.03564	6.39768	4.44023	6.8284	4.69839	4.62332	5.54491	5.21013	5.80189	4.5167	6.49792	4.77701	6.42324	5.22871	6.59545	5.71751	5.01035	6.83801	6.16075	5.50197	4.34723	5.73207	4.97041	7.73796	7.46808	4.60339	6.74963	5.09588	6.17039	5.6317	6.34815	5.33712	6.06344	4.25213	6.75609	6.92282	5.08939	5.34165	7.04683	5.9872	6.36445
HTA2-neg-47422398_st	5.73192	4.89313	9.30275	3.45674	4.85087	4.10482	2.79104	2.14173	2.71398	4.6736	4.39037	4.36117	2.99509	3.37132	2.56856	3.65352	5.0336	3.41324	10.1094	5.19703	3.26968	2.73756	3.49863	4.85531	4.04357	2.89298	3.69617	3.33911	4.48495	3.92987	5.43042	4.11994	4.77039	2.51214	4.45649	2.96704	2.8323	4.31791	2.4412	2.94	3.43696	2.54791	2.72349	2.98303	2.48817	2.94002	4.92243	2.85991	3.24305
HTA2-neg-47422416_st	4.5237	3.41667	5.49997	3.2564	4.83512	5.18297	4.16336	3.63053	5.21138	4.46612	5.38288	4.45865	3.64683	2.92859	5.0905	5.02896	6.47514	4.66818	4.88397	6.97351	4.94185	3.29753	5.93992	4.19882	4.7351	3.29401	6.26777	4.57781	4.50423	3.66476	2.93223	3.51917	3.02386	4.97723	4.59008	3.81279	4.27288	2.54177	3.62254	3.29739	4.72485	2.68275	6.15179	2.15368	3.67962	4.02163	4.51904	3.72198	5.40222
HTA2-neg-47422433_st	5.67009	3.55817	5.14325	3.71765	6.13783	4.31418	4.59611	4.07125	3.61125	7.59849	4.31455	3.86118	4.31408	4.52699	4.03429	5.2326	7.66124	5.05425	5.25288	3.94192	3.98684	4.44922	6.22185	5.28079	4.10531	4.1702	4.6566	3.02638	5.1333	3.52596	4.48702	4.55234	2.97668	4.89028	4.32629	5.42043	4.01485	5.28413	6.0132	4.79449	5.37484	3.72668	5.77411	5.38077	5.40355	4.06244	4.55253	4.3935	5.7384
HTA2-neg-47422438_st	4.95753	5.78503	8.2721	5.15679	4.4095	3.56794	5.11	5.82107	5.58698	5.0419	4.84982	4.15149	4.28791	5.1782	6.32794	4.3564	3.1006	4.90318	6.53598	4.94436	8.10627	5.0344	5.45033	3.60124	4.44893	4.1551	8.14469	3.26642	8.44017	7.71045	6.53725	5.57212	5.79834	5.52572	4.31639	6.78943	6.61831	4.72824	7.73467	4.55148	6.99128	4.70885	4.32883	4.57663	6.70029	4.98169	5.19152	5.08849	6.03172
HTA2-neg-47422444_st	6.71952	3.97251	4.88502	3.7199	5.21255	3.0663	5.21521	3.24287	5.02654	2.72796	3.80183	2.64732	2.43838	3.58402	4.64895	3.89071	3.95851	2.95897	4.57757	2.23731	3.89625	2.02151	2.43086	6.04015	5.06772	3.42781	2.54717	4.04399	2.23857	3.53645	4.84021	4.4754	4.38525	4.51679	3.79816	3.05319	6.1054	4.06506	5.48423	4.56525	2.29922	3.05103	3.29015	4.80746	5.37604	3.76492	3.37473	4.80746	5.10965
HTA2-neg-47422457_st	6.4213	5.48658	5.55033	7.19003	7.30241	3.96385	4.25386	4.55927	6.92018	7.04182	7.30349	8.93579	6.80304	4.88804	5.1562	5.24454	5.47072	4.49006	9.35571	10.3605	6.26929	4.2673	4.23893	3.89667	4.69277	7.52668	4.2781	6.9975	6.5405	6.58822	5.17957	6.50708	5.21671	4.84905	4.67034	6.2651	5.45969	3.75467	7.96153	5.38989	9.1663	7.186	5.29058	7.32672	5.34075	5.78808	6.41956	5.20334	5.10864
HTA2-neg-47422459_st	3.10016	3.29159	2.82479	2.78854	2.64202	3.14208	2.66885	2.68971	2.55622	3.61799	3.47093	4.06866	2.7957	2.51099	2.69952	2.40848	3.40408	3.45494	4.21494	3.08316	3.4691	3.48154	3.15421	4.00119	3.06977	3.73173	2.11289	2.79368	3.46863	3.00847	3.81721	2.41412	2.66326	2.94848	2.68813	2.87849	2.91936	2.40968	2.50291	3.37827	2.53385	2.65073	2.86278	3.00412	2.91127	2.31736	2.34265	2.57372	2.40939
HTA2-neg-47422461_st	8.99443	6.78796	7.32063	8.30524	7.38671	6.88032	6.34158	7.78363	6.39657	6.76995	7.55505	7.61014	6.45916	7.89219	5.42769	9.08468	8.09162	5.86256	10.4583	7.87608	6.17648	7.36182	6.76735	6.86863	7.1433	7.54592	7.8655	7.30313	6.77411	7.35757	6.06357	3.83705	6.78074	4.6561	6.25252	3.98912	5.73482	4.87882	6.5483	3.16542	5.12525	4.49922	3.81283	3.54004	6.38075	3.60095	5.146	5.03511	8.62978
HTA2-neg-47422462_st	3.64064	5.48049	3.3232	6.08138	4.82833	7.42684	3.35871	2.43933	6.56472	8.53309	4.3331	4.91503	7.35446	5.73497	6.77726	6.9719	7.75679	3.51271	5.32712	7.58527	4.49989	4.56559	7.12248	7.98981	5.88804	6.02125	9.16891	6.03443	3.83222	4.82454	3.86767	5.74945	3.88326	6.54936	5.58241	3.54733	5.41684	3.81592	3.8869	5.43928	5.38352	7.56271	7.68883	3.38464	4.83382	5.49065	4.7049	2.60961	6.92656
HTA2-neg-47422463_st	3.05893	5.18685	8.96999	6.46478	2.59125	6.61559	3.30769	4.11125	11.0663	3.51392	3.44586	7.48336	7.95831	7.89219	3.2493	2.74336	5.02654	7.14175	2.20164	14.8362	4.38082	5.41288	7.09527	3.08758	5.8894	4.52233	9.82125	9.36314	7.0937	7.5632	2.25349	2.60553	4.59487	8.58189	7.19112	3.8618	7.77609	2.74662	4.89066	8.33636	3.13918	2.7384	5.41645	3.84358	3.28848	2.44563	5.16128	4.32201	4.48462
HTA2-neg-47422480_st	4.81891	4.12882	3.93123	4.41491	3.56682	2.93887	3.20151	4.15428	4.15317	2.5994	4.16648	4.06794	3.40757	2.54187	3.07195	3.3063	3.25372	2.85956	4.09477	3.43587	4.65614	4.31491	3.2563	3.27006	3.79493	4.1848	3.48906	3.93941	3.68415	3.69517	3.35056	2.71599	3.94527	2.91893	2.2749	2.94424	3.72614	3.21882	3.3115	2.51413	2.07344	2.12202	2.49294	2.41295	2.90785	2.90785	3.22122	3.0446	3.08141
HTA2-neg-47422495_st	6.34045	5.13839	3.53898	6.79933	4.73113	5.85032	4.10602	5.65053	10.4382	6.36195	4.90944	5.80496	5.77628	4.92874	4.52359	4.78835	6.2031	4.6564	5.88567	7.79256	5.54624	3.30839	8.10455	4.66182	5.29339	8.80781	4.16799	6.87413	6.30639	4.26836	4.05478	3.63808	5.69249	6.42917	8.10012	4.67756	8.66921	6.53182	5.77533	4.83	5.14702	3.14333	7.29687	6.41906	6.62626	4.45659	5.6915	5.1064	5.23429
HTA2-neg-47422515_st	10.1709	9.45413	9.01575	9.17312	9.71585	8.21314	8.60838	7.18775	9.70016	8.49614	7.30019	9.01368	9.70958	7.35287	7.85068	8.01913	9.69507	6.89589	11.2216	11.9992	8.69606	8.73934	10.1963	7.54105	9.10777	8.86594	8.94284	9.49134	8.47299	8.29102	8.33826	7.86086	9.21882	8.03407	8.70615	6.85969	9.20472	7.80909	7.70627	7.07546	7.08917	8.05635	8.45714	6.3007	7.73455	6.17873	7.86439	7.47781	9.2731
HTA2-neg-47422666_st	7.23999	5.22856	4.73825	4.23597	5.47301	4.09086	3.10763	3.75939	4.15324	4.66514	3.07645	4.3029	3.91065	4.84701	3.09178	3.19337	3.14229	4.70446	3.64476	4.21631	6.56836	3.2193	5.99022	3.52241	4.56213	5.90643	4.24064	3.56971	3.71387	2.84778	4.88101	3.69073	4.72205	2.85054	4.61502	3.47716	3.42512	3.331	3.14339	3.01625	2.44442	2.6199	3.57685	4.20685	4.76392	3.01768	3.38867	3.76538	2.97261
HTA2-neg-47422669_st	6.05813	4.57873	5.27942	4.03833	4.98868	5.79022	3.60933	3.78729	5.0912	4.57525	3.71364	4.79039	6.41149	3.84465	3.3775	4.81865	4.02248	4.15491	4.52933	5.46263	4.47746	7.28515	3.36264	5.24584	3.66809	3.80925	4.71546	5.77803	3.75773	4.11627	5.42699	4.63183	3.22798	3.76617	5.01215	3.14085	3.32237	4.40227	4.65081	4.68877	3.94178	3.19759	4.0092	3.52442	4.21186	3.32887	3.45264	3.04778	2.86828
HTA2-neg-47422670_st	4.70634	4.68321	4.92002	2.29304	3.03964	4.80216	4.89131	3.05744	4.18388	5.17181	2.89709	4.92198	2.99843	3.16633	4.23931	5.11343	2.89746	4.20122	5.41905	3.95014	3.60232	6.10247	4.45024	6.48264	5.10413	3.15858	2.81837	5.52044	3.68415	2.95942	5.95048	3.66116	6.19392	5.07601	3.77764	4.36704	5.69927	4.79508	5.75331	3.47181	4.26712	3.79466	5.03986	4.23659	4.32691	3.98184	5.90717	3.26671	4.76783
HTA2-neg-47422671_st	3.50402	6.10539	5.21261	6.92896	5.26144	6.71437	6.12952	5.28236	7.43107	7.23737	5.30817	7.1574	5.3125	5.99037	4.45905	7.08782	5.62196	5.36172	5.30797	9.84001	6.36556	5.07636	7.27063	6.34405	4.45883	6.6014	5.6484	5.12325	7.42004	6.14013	6.03093	7.09619	6.45538	5.42799	6.82271	5.59938	5.44412	7.21016	4.48948	4.53456	3.65715	3.98381	4.899	5.88906	5.72141	3.6347	4.79264	5.73405	7.82968
HTA2-neg-47422675_st	4.15846	3.20165	4.1443	3.86558	3.46827	2.57899	2.71419	3.70836	5.42451	3.023	4.71022	3.27301	3.16997	3.45507	2.75859	3.13314	3.48531	3.00201	3.11103	3.4473	3.32196	2.81023	3.83393	3.34349	3.27522	3.06061	3.99392	3.65807	4.78056	3.11454	2.8603	4.16726	2.91636	2.97606	2.27564	4.09857	5.66446	2.76712	4.08136	3.62191	2.83564	4.98525	4.14447	3.392	3.01496	2.64753	4.12823	2.49907	8.27985
HTA2-neg-47422683_st	4.00272	2.93673	3.58938	3.13253	3.59752	3.61967	3.57727	3.99121	4.48263	3.71028	3.09102	4.83805	5.15835	3.60982	2.85457	4.05103	4.88511	3.57832	4.45126	3.07821	5.47336	7.44014	4.3924	3.09793	5.52877	3.9934	3.40238	4.16026	3.67222	3.11852	3.34028	5.2105	3.77929	4.86224	5.69624	4.57639	5.47326	5.75214	4.46092	3.81984	3.72824	5.63235	6.39863	3.07491	5.04205	4.18727	5.39855	4.3563	5.41843
HTA2-neg-47422685_st	3.58619	2.86985	2.764	3.04944	3.54041	3.30399	4.29566	4.79343	4.09028	2.66774	5.09239	3.49147	3.38844	5.17057	5.89927	3.26305	3.03946	3.08597	4.95951	2.73049	6.23426	3.11356	3.26321	4.37013	2.90479	4.82867	5.83307	3.93403	4.82872	3.85805	4.12232	4.73217	3.45429	3.8957	2.91938	4.71426	2.99621	3.06881	4.3461	3.23838	2.71081	3.08993	3.48302	4.20698	2.82323	3.25202	4.12232	5.02415	6.6695
HTA2-neg-47422688_st	8.28539	7.74513	4.5242	3.17001	6.26276	9.58	5.99121	5.24395	6.57803	8.37822	4.64895	7.88962	7.12196	5.17057	4.874	5.28054	5.51532	6.7827	5.54017	6.74826	7.13879	5.22021	4.01001	5.90754	6.57922	7.05127	7.81896	8.60044	10.8817	6.8077	6.70593	7.46684	4.93082	7.01518	5.05941	6.36401	5.41052	6.16795	8.01701	6.66153	6.33772	7.77508	3.684	6.59188	4.02675	2.05005	4.6943	7.99432	7.57606
HTA2-neg-47422699_st	7.44604	6.90244	5.45746	4.17595	2.79134	5.19581	4.19445	3.31841	4.56033	4.47991	4.11069	5.04817	3.12911	3.12308	4.92899	5.10465	6.10509	4.57046	5.26108	5.6675	4.09407	4.11034	5.73109	4.38399	5.81461	4.23844	5.10499	4.7543	4.36259	2.91085	3.50599	4.32684	5.22379	3.64043	3.59857	4.93992	4.317	4.44993	4.63137	4.9958	4.84208	3.5687	4.46831	4.36164	3.80578	5.14805	2.94476	2.82493	5.42947
HTA2-neg-47422731_st	3.34854	3.64165	3.66013	3.23802	4.7824	3.0389	3.80168	4.46916	3.34733	4.04766	2.84244	4.11579	3.06007	3.06952	3.01646	4.02783	4.07257	3.09737	4.36337	3.38211	3.29896	4.86237	3.04405	3.97554	4.55455	3.18132	3.63554	3.96327	3.23002	3.75112	2.31427	2.38098	3.14754	2.81714	4.25839	2.98928	3.70369	3.11111	2.61793	2.92512	2.94187	3.42284	3.26335	3.44265	3.7157	3.90912	3.42198	2.74994	2.98507
HTA2-neg-47422763_st	8.15015	8.7457	8.49275	4.83902	5.58242	5.90404	8.99011	6.22398	8.25314	8.77086	6.81492	7.91142	7.97241	5.12779	5.8375	6.58829	6.53174	5.13947	9.7442	10.9052	5.61474	5.41917	9.57545	6.38663	7.9465	7.36817	7.75247	6.89768	4.54699	6.71396	6.23321	6.46032	8.0538	6.8963	6.0929	5.7808	5.62307	6.67522	5.80833	7.63236	5.7465	8.3699	6.1257	6.07982	5.18543	5.64722	6.29835	6.62477	9.47158
HTA2-neg-47422764_st	3.38467	4.45029	4.87403	5.12454	4.45496	4.90217	5.34261	4.05213	7.29441	4.99166	6.39797	5.21421	5.53781	3.91404	3.73276	5.40434	6.63823	2.77511	3.8002	5.60842	3.97666	4.42292	4.65468	5.97488	3.7313	5.69187	3.20612	4.49213	6.11061	3.58676	5.26641	2.70713	3.54336	3.66488	3.41253	3.17105	2.39545	2.25203	2.96869	4.89212	2.76937	4.44003	4.82652	3.38464	3.46361	2.98226	4.46489	3.63109	7.05648
HTA2-neg-47422765_st	6.75597	3.69016	4.15104	6.03058	3.95578	4.53331	2.69768	4.91342	5.99143	3.89914	3.00292	4.21799	3.77586	4.96182	4.05016	4.29666	3.35517	3.53598	3.19733	3.63522	7.56884	3.93083	5.53972	4.61875	4.31183	6.36276	3.04996	4.70417	2.71802	5.0663	5.22307	6.112	6.36189	5.23824	3.89446	4.55668	4.76874	8.00629	5.35494	5.3267	5.62889	5.90799	2.8385	6.87806	3.9662	4.26806	4.99062	4.27474	4.6442
HTA2-neg-47422767_st	4.26471	3.33501	5.36192	3.75257	2.7569	3.57945	3.09045	3.46322	3.90415	3.32631	3.66762	3.31946	2.76717	3.43125	3.28167	3.90174	3.14254	2.98163	4.33376	2.75284	3.85654	5.21602	3.85457	4.09335	3.65229	3.31121	3.85262	3.30078	3.89031	2.61396	5.27132	3.47585	5.78967	3.14012	5.1979	2.46192	5.15546	2.7667	2.99726	4.18785	3.67937	3.18285	3.71925	3.65639	4.39421	3.29426	4.18723	4.30342	3.36866
HTA2-neg-47422852_st	3.08152	3.71972	4.87396	3.71272	4.33277	3.11101	4.71664	2.6489	2.67557	3.99162	4.08639	3.63999	3.44742	3.26632	4.1573	2.68295	4.4824	3.63238	2.98927	3.16181	2.81707	3.01383	2.89492	3.52241	5.12238	3.18672	4.6706	3.16685	4.69285	4.8364	5.72682	4.3026	4.07275	5.22553	4.58727	3.321	4.59059	4.22076	3.91819	4.25395	2.59509	3.46278	5.26809	3.3361	2.23178	2.76157	3.67642	3.95456	3.99436
HTA2-neg-47422881_st	5.09943	4.80687	4.27561	5.54079	3.69506	4.06231	4.07277	4.39984	3.9696	4.68851	3.69362	3.63823	3.88781	3.28165	4.16549	3.81669	5.89357	4.50642	3.73249	5.29439	3.37624	2.8559	5.67198	4.27596	4.47644	4.4448	3.76738	5.23658	3.31746	3.80292	3.35255	3.40742	3.30223	2.90692	4.62382	5.48926	3.44156	4.95994	2.82814	3.16331	3.77877	3.65857	3.54422	3.75692	3.40777	2.95531	3.43389	3.01317	4.48462
HTA2-neg-47422892_st	3.98498	5.92105	6.74987	3.40545	5.51159	4.58885	4.58874	3.73397	3.74067	3.51025	4.60917	4.4171	3.91197	3.29949	3.97281	4.1795	4.6879	3.48119	3.42649	5.24346	3.74254	4.92554	4.65181	5.21299	5.30324	3.48001	5.3482	3.68804	3.29469	3.60523	3.82535	6.96097	2.55948	3.28567	5.57259	3.64135	5.52295	4.33445	5.05968	3.43134	4.26244	4.25539	2.29416	3.14662	5.24273	4.58926	3.71343	4.0329	4.95483
HTA2-neg-47422896_st	4.0777	6.08812	5.49997	2.63125	6.78073	7.24427	5.99121	5.49252	8.72185	6.38354	6.2724	3.76017	5.50405	9.85345	8.36492	6.28936	11.4203	9.62752	6.79689	5.08782	7.27165	3.25889	4.82872	7.46836	6.31815	4.80006	4.65168	11.6154	6.59914	11.0326	7.22165	14.0724	9.55566	6.62524	5.18832	5.22933	6.18598	4.59008	7.0918	5.73028	4.96324	5.10965	6.97205	5.83611	2.90048	6.9272	6.86779	3.39369	5.10965
HTA2-neg-47422917_st	3.09943	4.97521	4.03243	4.56533	3.20358	5.08769	3.42719	3.59819	4.43417	3.84795	3.96832	3.50994	3.65146	3.22644	4.79761	4.88561	3.5875	3.1052	5.27789	4.34155	3.9502	4.30126	5.14581	4.54683	4.49239	5.63298	3.22939	4.36007	4.41568	4.26561	7.69313	3.57599	3.99113	3.26435	3.88214	3.64582	3.24474	3.88547	4.62839	4.18551	3.87127	3.84317	4.44728	3.31447	4.38835	3.51345	4.16792	4.01499	3.19413
HTA2-neg-47422919_st	3.8921	3.78495	4.43205	4.68368	3.21693	4.04567	4.51555	3.43289	3.09241	4.19941	3.82205	4.74134	4.42038	2.53236	5.23788	3.29523	2.99975	4.67192	4.73114	7.03453	3.64247	4.27917	4.66662	3.8507	4.7987	4.65676	4.77673	3.43606	4.65182	3.16153	4.5647	3.05423	4.11126	2.96541	5.27305	4.23182	6.00913	2.75941	4.4808	3.46654	3.21852	3.38831	3.37122	4.14335	4.01509	3.07542	3.24001	3.96236	3.71158
HTA2-neg-47422925_st	5.24103	4.80173	6.62179	6.90635	6.30669	5.39732	6.1534	5.25448	6.60211	5.19357	5.21402	5.90146	6.54366	5.38048	5.38742	5.54318	5.85936	5.84633	5.74024	5.27691	5.15419	5.58395	5.62287	5.02175	5.37195	7.18211	5.44471	6.34371	5.80798	6.11131	7.13802	5.23377	5.78199	5.52667	5.9453	5.16942	5.08018	6.01407	4.79969	4.67481	5.6344	5.3843	5.4208	4.94675	5.35684	5.41333	4.93312	4.73433	4.53746
HTA2-neg-47422964_st	7.43536	6.25862	5.53908	5.60847	6.71105	5.73483	5.42714	5.53954	6.61332	6.05706	5.38075	5.33038	4.98807	3.84954	4.38116	6.11807	6.79849	4.44468	6.37223	7.24569	5.27531	6.13598	5.58109	5.27933	5.78737	5.39289	5.53931	6.38975	6.25352	5.47556	6.58103	6.24216	4.62306	4.36042	6.0546	4.41893	4.66787	4.04928	6.02697	4.08197	4.36098	4.05086	5.62102	5.59567	3.13951	4.05906	6.99738	6.54308	5.05237
HTA2-neg-47422967_st	6.39348	6.27992	7.67548	4.28223	6.29149	6.08061	4.8576	5.68592	5.96625	4.95486	5.71564	6.32205	5.54607	4.38621	5.57808	5.96112	6.36262	5.09949	7.17071	7.14629	6.8847	6.06606	6.40575	5.88116	6.52107	6.86477	5.82081	5.25855	5.74932	6.58597	5.54675	4.86268	5.48263	4.62495	4.65144	4.34696	5.95239	3.62088	5.55692	4.80984	5.35584	5.16752	4.23119	3.7921	6.12495	5.3296	4.98119	4.137	7.44006
HTA2-neg-47422968_st	5.89379	4.0115	2.85987	4.63458	4.08179	3.87377	2.61926	2.83052	4.25039	5.2001	4.3139	4.00711	4.81322	3.88689	3.53952	3.20882	3.90832	3.75008	5.2246	5.67158	4.19864	4.46558	5.75808	6.287	3.32835	4.985	3.98355	5.53732	2.72825	4.75304	3.38961	4.8209	3.31191	3.23708	4.72933	3.5284	3.31802	3.82905	3.18893	3.67622	3.53823	4.21685	3.10338	3.99291	4.4973	4.01104	3.90092	2.46489	3.68153
HTA2-neg-47422977_st	8.58292	8.3522	8.49681	6.99712	8.03651	7.2363	6.68005	5.88169	8.19445	7.63184	6.62008	8.84242	8.09694	6.08029	7.12218	6.70007	8.82007	6.37554	11.3356	8.82437	8.56914	9.08795	8.44187	6.95447	9.15139	7.92477	6.16124	7.52985	8.80008	8.1511	8.52224	7.06886	8.46812	6.01405	7.86739	6.02134	8.20146	6.86614	7.62762	6.35274	6.14611	6.52747	6.90915	5.38231	6.75545	6.07411	6.53484	6.87191	8.95458
HTA2-neg-47422979_st	6.46739	9.16662	8.06466	6.96767	6.21256	7.71095	6.72732	6.1966	7.64284	7.63323	7.8911	7.82998	8.01653	5.03437	5.74473	8.74571	6.81061	5.17207	7.80088	8.87802	7.09813	7.63214	8.28395	5.16165	6.75336	8.73306	6.88158	8.09627	7.37369	7.92325	6.57058	6.07074	7.28796	4.67142	5.60071	5.73434	4.06717	4.19222	5.60929	6.32876	4.8626	6.16822	5.28557	5.30682	5.81118	4.66833	6.31339	6.6361	4.94864
HTA2-neg-47422981_st	3.96331	3.24915	3.00925	3.48136	3.36109	2.77076	4.05479	2.79178	3.2228	3.10834	4.23337	2.86271	3.11611	3.61184	2.38443	2.93805	3.03314	3.27365	3.73876	8.77163	2.81707	3.79089	2.74825	3.02596	3.24412	3.15633	3.27687	3.34817	3.40239	2.59898	4.07984	3.03989	4.20266	2.70558	3.92561	3.09102	3.69414	2.67823	2.40796	3.70238	2.57278	2.37848	3.51295	2.62078	2.6524	2.8551	2.54077	3.79523	2.62662
HTA2-neg-47422983_st	6.04466	4.51727	8.30718	3.51033	4.68398	6.29316	6.58407	5.72149	5.70347	7.05093	5.77467	3.6222	5.26013	5.95088	6.10991	3.75139	3.60341	5.37184	4.73629	3.61881	4.18314	7.06311	5.88065	3.61438	4.06967	5.79256	5.04608	4.70817	8.74683	4.14601	7.28112	5.9147	4.56537	6.84227	5.16874	5.56329	4.06844	5.2567	6.96677	7.14577	5.09464	5.83533	3.8527	5.3344	4.19843	4.04657	4.8662	7.62331	4.68156
HTA2-neg-47422984_st	9.04811	8.30926	7.56451	6.37682	6.73828	7.21371	6.57782	7.22796	8.20644	6.12603	6.45958	7.78205	9.19711	6.47429	5.4136	7.53065	8.01144	6.55628	9.53641	8.28172	7.74571	7.73858	8.78659	6.45914	8.11523	7.49084	7.04304	7.0924	7.41107	6.1476	6.28863	4.65388	7.52699	4.93534	6.56799	5.16849	6.20032	5.74572	6.90231	5.17746	4.79635	5.86936	5.98998	6.96199	6.6983	4.41398	6.67593	5.993	6.9665
HTA2-neg-47422985_st	3.71039	3.40312	4.47168	3.42004	3.76262	2.77662	3.0138	3.81441	3.13901	2.76971	3.35637	2.59255	3.02676	2.89362	2.44615	3.32637	3.77196	3.14676	5.07428	4.64777	3.67826	3.31808	4.04197	2.73694	3.28321	3.73467	4.14384	3.15281	2.35933	2.97433	2.19755	3.1244	4.67939	3.44385	4.08732	2.5565	3.69414	3.28233	3.75197	2.92896	2.86071	3.62058	2.94269	3.54004	3.9072	3.39713	2.3517	3.64299	3.61459
HTA2-neg-47423012_st	4.83687	4.39308	3.39954	4.80321	4.22584	5.16351	5.08806	5.65978	5.11437	4.81223	4.37539	6.08883	4.12012	2.84679	3.34213	4.70453	4.37402	3.36618	5.71874	4.43103	5.29122	4.21574	3.30829	5.38946	4.18342	10.9353	4.14565	8.65585	5.05119	4.53094	5.17026	4.07613	5.15354	4.51833	4.59923	3.33373	3.50679	3.71691	5.09676	4.05297	3.19398	3.35926	4.73174	4.72728	4.62403	2.96386	4.38915	4.16678	4.43668
HTA2-neg-47423025_st	4.93455	5.5139	4.81975	5.63802	3.27121	3.34878	4.57636	2.79478	4.01227	4.00124	2.90964	3.52959	4.4721	4.82024	4.72361	3.93658	3.72071	7.27657	4.51782	6.95104	3.73598	6.97285	5.67326	3.6782	4.4787	4.11268	4.19407	3.8566	3.72239	4.31527	5.64723	3.07169	3.4709	4.3695	4.71016	3.78399	4.95413	3.65613	4.54193	5.13306	3.47399	4.2004	4.39753	6.02493	7.04751	3.22354	6.1906	5.02383	4.55593
HTA2-neg-47423026_st	6.2541	8.03917	14.2487	4.14932	8.81347	9.6758	8.99339	11.2744	3.34607	4.32745	4.04399	7.09765	5.2625	14.4739	8.59095	6.16724	8.07664	7.6055	10.0281	7.65328	8.02422	8.22098	8.25066	10.8065	7.9647	8.10026	15.2413	8.23826	11.7046	9.78951	5.6947	7.77772	4.93082	14.3273	5.70547	13.379	9.6069	13.4391	9.88824	15.8175	12.7636	14.6113	14.4814	13.7843	11.3353	13.2125	10.2572	12.496	8.10889
HTA2-neg-47423028_st	3.39204	3.61534	5.03635	3.46334	3.13166	4.03382	3.44705	3.64926	4.08645	2.37294	2.52074	3.02528	2.50378	3.27849	2.95053	3.89071	2.40484	2.67475	2.84767	2.68894	3.41282	3.99953	2.56515	2.81457	3.31059	3.89101	2.99732	3.22642	4.2808	3.13528	5.00973	3.57594	3.88644	4.16421	5.96323	4.2398	2.41629	3.62088	4.89066	3.23812	3.63221	4.47524	4.46653	4.74224	4.47505	4.24022	5.72025	5.02415	3.78127
HTA2-neg-47423030_st	4.91165	3.40914	3.99575	3.85978	4.68826	4.68398	4.67132	4.44722	3.5986	3.66594	4.38245	4.56597	5.32601	3.38726	3.45429	4.04399	2.97379	3.89604	4.62499	4.05545	3.31813	6.57004	3.57035	4.06729	3.38792	4.21429	4.0179	4.07611	4.01691	3.93305	3.1632	4.81397	3.30291	4.20291	4.27264	3.98836	2.84255	3.94561	3.0382	3.73824	3.69344	3.44814	5.65652	4.50565	3.5242	3.54397	2.37132	3.68613	4.8104
HTA2-neg-47423032_st	3.7492	5.30855	3.64971	4.04882	5.91191	4.90429	4.08262	5.17558	6.19026	4.39453	5.04011	4.01225	5.64503	3.40326	3.51389	4.43018	6.46785	3.43012	4.04061	5.27013	4.29816	6.57809	6.59167	4.37569	4.77455	7.19295	4.64113	4.30582	4.0909	5.09591	3.84586	4.80221	4.95176	4.96461	5.45624	3.01883	6.63055	4.15759	3.39478	4.5454	4.81186	3.21924	4.83485	4.41415	2.90048	4.50154	3.76602	3.19935	4.64484
HTA2-neg-47423047_st	4.11795	5.77286	3.88144	6.09746	4.35261	4.22386	4.04203	3.59148	5.63958	3.63345	4.87234	4.34611	3.90709	3.5523	3.9795	5.68523	5.29204	4.52593	3.64272	7.3499	5.53033	5.09076	5.29033	4.18178	5.37026	3.41739	5.31672	4.62459	5.46206	4.42494	4.88556	2.97402	4.62942	3.08514	5.99455	3.14756	3.02952	3.9047	3.33132	4.82541	3.93448	3.57199	2.59107	3.41124	4.73427	2.57843	3.75937	4.11241	6.55973
HTA2-neg-47423051_st	4.68314	4.96125	6.83848	5.45693	4.93287	5.88342	4.39415	4.01066	3.1281	4.83507	7.34477	5.12469	3.7674	5.26963	5.48424	3.97466	7.46498	6.31599	5.13033	4.48719	5.37485	6.41187	5.72881	4.8265	6.28991	4.80658	4.22441	5.60787	4.0691	4.25873	4.10108	5.04742	4.9605	5.96595	6.27497	5.35865	3.72073	3.26735	4.09116	4.00237	3.66458	4.38418	2.67509	4.85602	4.01966	4.23029	4.12698	4.59226	6.18784
HTA2-neg-47423059_st	4.38584	2.89251	3.21629	2.9799	2.37268	2.91101	3.3451	3.28306	3.63995	3.31753	2.71641	3.0383	3.12685	2.48535	4.33263	3.3429	2.56369	2.60516	3.76153	3.03458	2.80285	2.42972	2.38182	3.29622	2.68364	2.93777	2.69068	2.95359	3.47024	3.6577	3.4621	2.88343	3.15878	2.41945	3.12687	2.59603	4.15643	3.24065	2.43872	3.11582	2.429	3.24651	3.23715	2.54843	2.51818	3.81875	4.66245	3.33754	2.88573
HTA2-neg-47423060_st	3.41312	4.22625	3.26268	4.45067	4.84805	3.42827	4.65964	3.42889	3.35774	3.51018	4.21166	3.52227	3.35325	3.77877	3.40982	2.92782	5.03094	3.06472	5.22255	4.10918	4.55745	3.47196	3.48833	3.42781	3.69911	4.98726	3.44437	2.88489	3.9616	2.83902	4.5543	4.97683	3.65788	4.27385	3.88455	3.40653	3.30645	2.56114	3.68086	3.28117	3.40289	3.14432	3.76472	3.23994	4.30185	3.10363	3.31246	3.48543	4.23043
HTA2-neg-47423061_st	3.46022	4.31087	4.19534	3.24487	4.35493	5.28081	3.67068	3.01607	4.66494	3.42781	4.58782	3.73863	4.95735	3.44952	4.18194	3.71884	3.53588	3.84952	6.80841	3.93456	3.01977	3.90018	5.0077	2.98244	3.06166	4.51245	3.26044	4.83037	5.85257	4.04973	4.0187	2.98394	3.94094	6.39501	3.00786	2.78472	3.13196	3.25306	3.91819	3.84928	2.73469	4.47874	4.17908	3.17635	2.75412	3.55352	2.89561	4.97985	2.99952
HTA2-neg-47423062_st	4.5055	2.77995	3.60211	3.34664	3.23139	2.56642	3.05589	3.87597	3.26981	3.5962	4.60346	3.69513	4.02078	3.01189	2.77405	2.84108	3.02657	2.96439	3.44617	2.96471	4.34036	3.882	2.94675	3.54899	4.20739	4.90855	3.4121	3.8751	3.35742	2.65371	3.03013	2.7909	4.35228	3.16557	4.37237	4.40843	3.29761	2.57432	2.92349	2.94311	4.04845	2.97976	3.22558	2.61353	2.83367	2.68868	3.03356	2.95917	5.09414
HTA2-neg-47423065_st	4.89954	3.86525	2.74965	4.76798	4.23472	4.61275	4.33684	2.83987	3.38443	4.67964	4.31203	4.37251	7.15744	3.22088	2.34835	4.0098	6.20388	4.70526	5.88287	5.36475	4.13953	4.43895	6.3046	4.66714	3.38682	6.59403	3.60032	5.81082	5.32344	3.20326	7.00227	5.01962	5.05893	7.38303	6.21072	5.3502	4.37929	4.15956	4.07761	4.04119	3.95744	3.72862	4.09672	2.57926	4.11234	5.01144	3.72937	3.09992	3.76466
HTA2-neg-47423073_st	4.56525	4.89761	8.64057	4.4123	6.57773	4.78274	4.85073	3.0935	4.62859	5.00499	5.23539	6.02025	4.28091	3.92214	4.14017	5.0227	3.40627	4.79659	4.48912	5.38322	5.7705	4.47695	5.11379	4.99916	3.5332	4.75225	4.90982	4.83764	6.6924	3.40296	6.29209	4.73041	5.03747	4.21599	5.47654	3.00482	7.08699	4.48649	5.66751	4.68294	4.2855	3.26878	4.69838	5.0457	5.05079	5.03962	5.77745	3.9007	4.53373
HTA2-neg-47423074_st	3.16369	3.21663	4.66522	2.92117	4.3542	2.84538	3.60126	3.84526	4.33416	3.75717	3.17883	3.29136	4.90933	3.43286	2.95534	3.32596	3.43615	3.07805	3.88716	4.67879	5.50901	3.33615	3.69064	4.00936	2.60784	4.08553	4.11379	3.52746	3.83529	3.42883	3.77279	3.58066	2.66196	2.58634	4.06784	2.44401	2.79788	2.65922	3.4737	3.8746	4.22152	3.3328	2.54998	3.56382	2.82828	3.04021	3.64867	2.73572	2.89525
HTA2-neg-47423090_st	5.41885	5.94546	7.54589	6.24749	6.21801	6.69241	6.58258	4.64172	7.4368	7.18897	4.64546	5.42574	6.48565	5.16947	4.85883	5.68905	5.91044	5.13759	7.1339	9.24713	5.68955	7.15583	8.20498	3.69253	4.4573	6.11442	5.72013	6.20696	6.53349	5.96197	4.84049	5.77832	6.50658	4.16611	3.7975	5.21566	6.22992	5.38373	5.01418	5.54987	4.23388	4.26249	3.98808	3.72238	4.46642	4.91382	4.66795	4.10045	5.10326
HTA2-neg-47423091_st	5.90518	6.41075	4.62497	6.75145	5.80605	4.31899	4.91234	4.80508	7.20594	6.99674	5.03322	5.2684	6.03622	3.95309	4.28091	4.63799	4.94294	3.75426	6.89314	8.73378	4.34428	3.93585	7.42902	6.22573	5.54258	6.42264	6.39993	5.90473	5.11304	3.18008	6.88506	5.22552	5.28615	5.00908	6.44542	6.7732	6.75532	6.32184	4.82894	6.09705	3.43061	3.22148	2.43504	4.7832	5.63061	4.08931	5.0787	5.45896	5.29841
HTA2-neg-47423111_st	3.46013	4.91939	4.31334	5.86099	3.48693	4.75323	4.82515	4.55532	4.91552	4.23978	4.90087	5.21065	4.11832	3.72937	3.81764	4.78243	4.75141	3.82784	5.79489	5.78675	4.20444	4.16255	5.3125	4.81571	3.7134	5.17902	5.17117	3.45168	4.27762	5.09593	3.77909	2.84087	4.73626	5.01792	2.76216	4.69697	3.24931	4.07678	5.35247	4.17484	2.73376	2.4963	3.8243	3.30269	3.49788	2.70433	3.68953	3.41414	3.86158
HTA2-neg-47423112_st	4.88334	4.44969	4.14709	4.09626	3.53573	3.11904	4.96836	2.99955	3.21085	3.42496	3.8845	3.55993	3.33549	4.42473	3.25911	3.67554	2.84116	6.3935	5.26457	4.85272	4.73156	4.23708	3.89352	4.8265	5.26625	4.25562	7.22106	3.7792	3.42323	3.01569	4.49725	2.87031	4.10544	3.0233	3.67683	3.83614	5.08994	2.80595	4.32567	2.80478	4.00243	3.09703	3.3748	4.72912	3.50635	3.08644	2.75571	3.2245	5.24544
HTA2-neg-47423115_st	5.55525	5.75582	6.53893	4.34499	4.54191	3.56728	5.58333	3.49469	4.54604	4.1834	4.00907	4.49955	5.16655	3.02318	4.71597	3.46624	4.41625	3.35247	4.94453	5.14089	4.42856	4.13996	5.14469	4.94894	4.61391	5.2269	3.7192	4.56176	5.62176	4.37211	5.98986	4.11799	5.29556	3.26163	4.16516	3.44208	4.48046	2.88527	3.90571	3.27194	3.2392	2.75728	3.07211	4.86486	3.97238	4.78885	3.79391	3.33449	5.83766
HTA2-neg-47423121_st	3.59958	4.20686	5.37257	4.77211	6.77351	4.13139	4.2271	3.12787	4.67829	2.27606	3.98722	4.72737	4.5101	4.10617	3.90641	3.74153	4.79363	3.87885	6.93963	4.9646	7.67551	3.92849	3.47715	4.33441	4.12497	4.09322	3.96302	4.8788	4.20157	3.48066	4.76235	3.86883	4.31804	3.55671	3.56759	3.39842	3.98501	3.91108	4.8057	2.95063	2.87091	3.91995	2.61902	2.71817	3.10358	3.37439	2.49205	2.56025	2.94466
HTA2-neg-47423153_st	5.41288	7.46701	3.24348	7.34112	6.05013	5.11099	8.64061	5.95046	6.19806	6.46988	6.94836	7.31419	8.10823	5.04692	6.126	5.01261	8.17877	6.45324	8.47802	8.32625	3.67709	5.94159	9.35352	5.48114	7.3732	7.30701	3.35758	7.44449	8.47767	4.48612	6.91383	3.89492	4.68478	3.03319	5.59157	4.95507	5.60692	5.44489	4.97044	7.16772	4.40206	4.44266	6.26567	3.84358	2.91826	3.37985	3.82889	3.12695	3.92611
HTA2-neg-47423157_st	4.66372	4.79472	4.15132	3.9166	4.49173	4.53926	3.81413	3.28685	4.59615	4.37144	3.57158	3.69653	4.49033	3.33732	4.11231	3.29501	4.27406	4.50433	3.86263	4.53277	4.24976	3.25701	5.91511	4.65958	4.04167	4.47325	4.28577	4.30715	4.19705	3.73438	5.36901	3.82971	4.76058	2.94779	3.27546	3.32376	3.19119	2.69659	2.71935	4.12983	3.87173	2.96105	3.97665	2.88517	2.67668	4.23614	3.90304	3.8096	4.85115
HTA2-neg-47423158_st	9.19938	9.48201	9.76794	8.53994	9.97446	5.18685	8.82101	6.49717	7.24355	7.34014	5.98895	8.27509	9.89176	5.22686	7.6401	7.37209	8.85452	6.75345	10.9995	8.6911	8.49304	8.34652	8.98107	8.24423	9.35304	8.19009	7.81896	7.67252	8.58947	7.90097	8.5455	6.75333	8.67858	6.31174	10.0318	7.21465	9.13029	7.72897	8.31536	8.20291	6.10546	8.02638	8.36795	6.13301	7.82914	6.76009	6.48753	9.35231	10.1969
HTA2-neg-47423174_st	8.9293	7.01691	4.05228	10.2421	3.96566	8.76345	12.4564	4.96181	11.5526	10.918	10.5862	5.41905	4.18188	8.9892	5.25687	6.28936	2.35129	12.3237	4.42631	11.6745	7.73744	4.80006	4.33475	5.97579	10.5754	6.74931	5.31047	6.57426	2.90852	9.60742	10.4939	4.95712	5.7383	9.45204	7.43922	7.48085	8.31635	6.78049	5.48423	7.75383	3.8739	3.62297	6.97205	4.90628	5.10965	4.66833	7.71406	8.72189	7.63934
HTA2-neg-47423186_st	5.15766	5.67851	5.32149	4.19607	5.28044	5.39603	3.45202	4.85222	5.60315	4.32429	5.22022	5.42056	6.26039	4.60026	3.98424	5.10501	5.58572	4.77495	5.49526	6.21303	8.39566	4.77501	4.78654	4.62536	5.17045	3.7319	5.84082	4.27819	6.65601	5.44779	5.49862	4.8862	6.88773	4.18386	4.83131	3.40302	5.06926	5.02693	4.45026	3.95678	4.23895	5.13929	4.82566	5.24346	5.33559	3.81227	5.047	5.07069	5.80643
HTA2-neg-47423203_st	5.02185	3.58312	4.25424	3.43198	5.01421	3.69776	3.01798	3.4388	3.92504	3.53054	2.5051	3.17457	4.31467	2.47999	4.09698	3.62537	4.14678	3.99645	4.35948	5.97501	3.45356	3.5266	4.29423	5.2126	3.19512	4.08379	2.74291	3.7021	3.57544	3.42645	5.06708	2.70713	3.26869	3.95564	3.46808	3.19743	3.937	3.26879	3.82155	3.91863	3.04598	2.36021	3.44121	2.93449	3.76776	2.8611	3.12082	2.63953	3.0633
HTA2-neg-47423221_st	5.62267	3.57059	4.82938	6.07921	2.93865	4.21385	4.7848	3.60208	4.24287	3.43135	4.10625	4.33499	3.03868	2.86054	2.82145	4.51302	3.76958	3.08991	3.87305	4.19581	3.14157	3.61246	3.5998	4.68977	3.08026	3.79552	4.85199	3.15995	4.18025	4.0434	4.47639	2.98395	3.76558	2.891	3.25757	3.35505	3.92714	3.27335	3.23353	2.89752	2.81664	2.96761	4.13897	3.06674	2.74683	2.50252	2.83307	3.40085	3.19642
HTA2-neg-47423226_st	6.86457	5.14645	6.22942	4.8967	6.23232	6.02337	5.23385	3.91409	6.06529	7.29205	5.82806	5.41905	4.77921	5.03437	4.81074	6.11837	4.36851	4.82872	6.79689	4.51549	7.73744	6.83475	4.9205	7.4316	5.23597	5.17441	6.53234	5.86518	5.19374	4.87858	4.84021	4.60455	4.6257	7.34202	4.5365	3.22944	4.52683	3.72995	3.95055	5.73028	2.45813	5.73113	4.64805	4.00728	4.20673	3.28517	4.60751	4.85269	6.70131
HTA2-neg-47423235_st	7.9042	7.46701	8.17169	7.12727	10.1885	9.32647	8.37609	5.68387	11.7986	11.7593	6.34724	7.18409	9.08589	8.40526	8.87258	9.34648	9.09103	6.9884	10.1199	9.388	7.12546	7.0854	9.1467	10.0285	8.2114	6.43351	9.82168	10.1497	11.0615	10.7169	11.9482	11.2354	6.91681	11.6607	12.3391	11.4253	11.1997	13.6879	9.36073	8.71876	8.20871	11.8258	10.0337	12.5433	13.8917	10.006	13.4766	11.3259	12.5171
HTA2-neg-47423273_st	5.13669	5.25136	3.84199	3.9863	4.76041	4.44487	4.10399	3.9451	5.23629	4.8071	2.9833	3.6997	3.48335	4.00088	3.75052	3.80327	4.67502	5.0086	4.54043	4.51977	4.42223	4.18292	6.09599	2.96028	4.77397	4.39961	4.21839	2.92865	5.2437	4.91169	4.66158	3.47505	5.30934	3.99168	3.43582	2.33475	4.33041	3.37557	4.29358	2.77635	2.93755	3.54206	3.56491	3.88311	3.13332	3.04044	3.90288	3.32005	4.68943
HTA2-neg-47423277_st	3.61635	4.47686	6.17884	4.00304	7.05631	3.79427	5.85674	4.45036	3.44318	5.17057	2.86702	5.06543	4.39239	4.27234	2.76418	6.60363	5.17057	4.3088	4.35681	4.27632	6.95282	5.55646	4.10444	2.37759	3.95607	6.04254	4.60048	3.334	5.08231	3.18246	3.29363	4.63101	4.32111	3.82993	3.18391	4.17793	3.58739	2.61813	3.60564	2.8195	3.51076	4.66319	2.98455	3.29033	5.23569	5.43454	2.38588	2.7314	2.40203
HTA2-neg-47423294_st	3.94169	6.33579	4.46865	5.02107	5.27679	5.03669	3.90878	4.24341	5.03497	4.80426	3.22057	4.74198	5.23908	4.29623	4.06446	5.32834	5.43238	5.11591	5.87087	5.48361	5.51217	6.07712	3.58039	4.85582	5.41731	5.88078	5.04619	5.39416	6.77643	4.0022	4.15354	3.21788	4.41906	5.21817	5.87623	5.4539	4.88414	3.80532	4.96061	3.55244	4.15063	4.34359	4.65791	4.23172	3.54313	2.68172	4.15407	4.56988	4.69822
HTA2-neg-47423295_st	4.67143	3.82105	5.49997	3.99915	5.10313	5.62986	4.70521	2.99769	3.47425	4.42096	3.43151	3.90774	4.95788	3.95452	4.07844	5.28361	6.34446	4.35223	6.46257	4.66993	3.00649	3.5734	2.97525	5.12323	4.5578	5.01395	5.07931	4.49233	10.9671	6.55384	6.5286	4.32769	4.73465	3.90335	3.16551	3.8618	3.48191	5.56577	6.59672	5.19681	3.33407	3.05103	3.52838	3.49799	3.86214	2.90048	3.52838	3.96109	3.22829
HTA2-neg-47423296_st	6.13245	3.33605	4.75308	3.97672	5.19369	3.76131	2.99518	5.06181	4.2174	3.92953	3.37871	4.11564	3.42355	2.81494	5.05571	3.68312	3.21548	3.63962	3.60477	4.09044	3.77555	3.07582	4.22415	3.50741	5.30002	5.69621	3.79493	4.74094	6.30634	4.22086	5.59361	3.91614	4.40114	5.01946	5.73196	4.35674	4.50136	3.36695	4.50185	4.33292	3.31828	3.81942	4.17799	3.37473	5.17218	5.0055	4.60025	4.81267	3.8866
HTA2-neg-47423298_st	5.27354	5.45633	5.75327	5.04892	6.36081	4.44263	6.11181	3.66566	6.04483	4.15104	3.54243	5.19124	4.99683	4.7264	3.07408	5.42393	6.01445	5.78493	5.91888	5.02403	5.42326	5.32859	6.11168	3.81331	5.70092	6.40302	5.22586	4.78948	5.80707	5.98182	4.24812	4.41003	4.96251	5.03305	4.44367	4.09902	3.03032	3.78058	5.04146	3.95974	4.2629	4.99849	4.79187	3.83539	3.85339	4.08411	4.91752	3.2774	5.84952
HTA2-neg-47423299_st	3.47754	3.07185	4.46029	3.25076	3.66517	4.4592	3.63396	3.9684	5.65304	3.94426	2.74243	3.18195	4.12029	2.07974	3.66162	3.35499	3.53685	2.69885	4.26645	4.45092	3.81665	4.11406	3.49603	3.45624	3.63183	3.55835	3.86055	3.88797	4.47638	3.88004	3.68754	2.67597	3.31777	2.72202	3.13692	2.77396	2.63599	2.5241	2.91641	3.34235	2.56939	3.32781	2.85104	2.50875	2.55813	2.72663	2.6328	2.55705	2.98629
HTA2-neg-47423300_st	6.76007	6.22003	3.97465	5.12007	5.34761	6.0407	6.32552	4.31291	6.49735	4.22579	5.74665	4.22939	5.50427	5.1677	5.00418	5.07616	4.75322	6.77719	3.94654	6.15145	3.66025	5.6752	5.22426	3.77437	4.36592	5.70251	5.78796	4.28835	4.77295	5.34682	3.33444	5.544	6.86527	4.58127	4.62696	2.77305	6.15804	6.43032	4.48788	4.40338	3.71709	4.14734	3.57685	4.91144	5.6597	4.26588	4.5508	3.01625	3.32372
HTA2-neg-47423302_st	12.3739	13.5874	14.4647	11.4193	11.4608	11.0709	11.7391	9.36427	13.1504	10.3048	11.4412	13.1171	12.7239	9.99678	12.3023	12.4794	13.6714	9.36022	15.4707	14.9086	13.1938	13.2627	12.7016	11.9098	12.9606	12.5072	11.8627	11.5736	13.2113	13.381	13.2262	11.4412	13.486	10.599	11.6206	9.45475	11.0107	10.7616	11.0594	10.494	9.79804	10.9819	10.3094	9.87493	11.2903	10.2641	11.4318	10.7274	13.3922
HTA2-neg-47423307_st	4.96724	4.82685	5.09579	4.65709	3.25609	3.72977	4.83499	3.45624	6.67568	3.14811	3.63312	4.1736	4.40068	3.07783	4.07764	3.18132	5.42098	4.12545	4.89297	4.70879	3.95268	3.89308	5.51979	3.03587	4.90132	3.79369	4.65707	4.03794	4.53835	3.45529	4.48328	3.27092	6.54969	4.09355	5.30034	4.0814	4.29428	3.88067	5.05292	4.69573	3.84185	5.76905	3.59244	4.73225	5.73543	4.44343	4.29418	3.29481	5.131
HTA2-neg-47423316_st	3.61635	6.62004	2.987	5.11012	5.75337	3.26305	3.05893	2.52287	6.30527	3.79547	2.06346	4.42292	5.50405	3.27849	3.14425	3.74464	2.44399	4.0777	2.97965	2.91481	2.90415	5.7623	3.58246	2.54444	2.25258	6.66908	5.18685	2.75668	3.84449	3.84651	3.91939	2.08236	2.6225	5.07601	3.34118	2.69159	2.93884	2.41961	2.55359	2.01625	2.61201	3.79466	3.12695	2.92571	3.07301	5.63128	6.92044	3.39369	5.6766
HTA2-neg-47423317_st	6.21956	7.34249	6.08261	5.09337	7.97901	7.93784	6.24309	5.31596	7.32994	8.22635	5.44918	7.62088	5.38327	4.91483	6.52614	6.46975	6.88757	6.77543	4.40004	8.1052	4.40904	6.37515	5.52839	5.40719	7.58645	4.12969	5.12429	5.0225	5.01284	7.69202	5.00075	5.61062	7.00812	6.77179	6.77394	5.56974	5.08394	9.00591	8.01371	5.21622	7.06349	4.85934	6.91199	5.24871	6.28354	4.46243	5.32972	6.71672	7.44948
HTA2-neg-47423336_st	3.79147	3.87642	4.44653	3.75844	4.24696	3.50874	4.15194	3.2625	4.8597	3.70833	4.29613	3.52283	4.30373	3.93391	3.33507	3.87291	3.87538	4.38212	3.70467	4.04368	3.41494	7.93476	4.03835	6.75439	3.52634	5.00924	4.62502	3.03983	4.70886	5.23271	5.16614	5.91865	4.18948	5.26453	3.25932	5.82988	6.59761	6.76402	5.20112	5.2357	5.42796	5.46925	6.64223	3.55571	4.50153	4.80911	4.42486	3.41603	3.40089
HTA2-neg-47423340_st	5.30419	6.68295	7.2216	4.00911	5.12507	6.77674	6.47279	4.45234	5.83665	5.18101	4.30833	5.12469	6.41969	5.28947	6.14108	13.069	5.69429	6.22593	13.3139	9.27388	3.87914	5.70115	6.7025	5.82948	3.9423	7.15884	4.64444	5.70602	13.5369	4.99015	9.43892	5.89316	7.62128	5.37996	4.54133	3.28709	3.83049	4.14501	4.80034	5.27108	6.21802	6.30154	5.40771	4.90852	3.66355	2.9553	5.09735	5.66085	8.11498
HTA2-neg-47423348_st	3.3574	4.15432	3.68282	4.02772	4.63608	5.13482	5.70377	3.92443	5.19142	4.45537	3.42848	5.48696	4.20489	3.75952	4.76419	6.1506	6.26561	4.18161	4.84968	6.10973	5.03128	4.39357	5.52467	4.7946	7.86259	4.28735	5.37688	6.70699	9.47808	3.37505	5.80178	4.19078	4.84693	4.4968	4.23301	3.80337	5.32434	5.46175	3.33066	5.20488	4.38854	7.12801	3.81309	3.45963	3.79943	4.43686	3.67642	3.13226	6.41513
HTA2-neg-47423377_st	3.74523	4.71889	6.5188	3.42207	5.34796	4.79621	5.93171	8.3592	7.57789	4.44135	4.3545	4.52898	5.08211	6.40481	6.99023	2.95342	2.93793	5.40542	4.00517	5.46581	5.07608	5.07966	5.86645	3.02309	4.87798	4.881	3.55027	5.45876	9.63211	7.42046	4.56798	4.55149	4.17472	8.04204	9.31266	8.20194	6.46461	10.0875	7.05346	6.94394	6.8733	6.64497	6.3586	8.32513	6.49023	6.66414	5.7879	6.4101	5.98225
HTA2-neg-47423380_st	4.57241	5.17492	4.71786	4.40302	4.39003	4.79142	3.51445	5.24395	2.63772	4.46548	4.19206	5.49953	2.89452	3.07536	4.01006	3.87383	5.62299	4.49561	3.77633	6.78948	3.90469	3.80183	2.69176	4.97988	3.28868	4.0167	4.04157	5.48681	3.58	2.74138	4.50473	3.83336	4.97753	2.875	2.68642	3.97544	4.2586	3.65673	3.62879	3.05454	4.2178	4.23045	3.76713	3.01678	3.7121	4.20353	5.69553	4.30728	4.65098
HTA2-neg-47423384_st	5.93287	6.34326	4.84985	4.81124	6.19129	5.28339	5.137	3.7876	6.55186	5.68905	3.58437	5.51745	5.71348	4.90565	5.20456	5.49928	6.22141	5.31851	7.39751	7.95743	5.19772	5.88885	5.90476	4.33585	5.03284	6.63864	6.88715	5.35991	6.40823	5.47995	6.07409	5.32191	5.49941	5.00372	5.52778	4.01987	6.33168	6.85704	5.74963	5.25158	4.12442	4.42664	3.98352	4.5905	3.84133	5.56373	4.32672	4.57994	7.29471
HTA2-neg-47423391_st	8.24396	5.26527	3.28444	5.19096	4.37326	5.65388	5.14014	5.3006	5.08967	5.24323	5.42	5.33755	5.88122	4.2615	3.94291	6.58832	4.10724	5.05696	6.9111	6.13978	5.85105	5.89863	5.5323	5.51663	6.16139	3.85131	5.38024	5.98815	5.71916	5.43926	5.81253	5.55537	4.8063	5.92276	6.75914	4.6723	5.35614	4.7801	4.69513	3.7919	4.76041	4.46125	4.81351	5.60656	5.20393	3.41757	6.32443	5.54398	5.50321
HTA2-neg-47423420_st	7.45267	6.30726	6.57572	5.41265	6.49728	6.08588	5.64275	6.29252	8.36447	5.8426	5.68454	7.8399	7.05997	4.38553	5.03115	6.91586	7.41217	5.77773	7.4173	8.9683	8.09813	7.03076	8.9088	6.05484	6.68169	7.38446	5.79659	6.32755	6.37887	6.63639	5.87211	3.83683	5.63863	6.11818	5.53644	4.27702	4.95328	5.18959	6.18267	4.89477	6.32429	4.21872	5.76907	5.33718	4.68336	4.87938	6.67855	4.12334	6.29203
HTA2-neg-47423425_st	3.77599	4.73317	4.75073	5.76473	4.52025	5.98266	5.1202	4.484	6.51519	5.11241	5.61909	5.5211	5.95617	4.49157	5.24467	5.62014	4.89131	4.81433	4.72317	6.28612	5.617	5.20541	6.00864	5.89682	4.87424	4.32532	4.77748	5.20612	5.15385	5.07308	3.13239	3.46279	3.01207	4.13918	3.65084	3.48939	4.00875	3.6278	3.87239	3.70036	3.49805	3.57072	3.42307	3.47273	2.52762	4.21913	3.85227	3.72665	4.82854
HTA2-neg-47423444_st	3.87521	5.31588	2.987	3.94941	2.86395	4.49485	3.67898	4.21023	4.9048	4.81275	3.90845	3.58709	3.84586	3.508	2.86024	3.48955	3.35875	3.08597	3.77016	5.31733	3.44098	4.59732	4.48249	3.96076	4.64027	3.65732	5.41636	4.04399	2.94831	3.28797	3.71181	2.52169	3.98816	3.15741	3.18391	2.21863	3.38127	3.00849	3.27746	4.12036	3.63832	2.87108	3.86355	3.04036	2.51386	2.84438	3.83044	2.52884	3.83015
HTA2-neg-47423501_st	5.26236	2.58506	2.79422	3.82279	3.03023	2.89054	2.46376	3.46395	4.551	3.42781	3.09186	2.87886	2.41343	2.70987	2.66831	3.36595	4.21247	3.20211	3.4758	3.95014	3.29896	3.35275	4.35	3.59149	3.46048	3.35919	3.56285	2.88148	5.18521	2.80059	4.07269	4.56774	3.85337	2.68308	4.19809	2.61429	2.65777	4.06506	3.94265	3.00099	2.32827	3.26113	3.37385	3.79353	3.77751	3.76492	5.49946	3.23532	2.42678
HTA2-neg-47423502_st	9.87927	7.60912	6.0844	8.8253	8.28189	6.81033	7.75796	7.55383	6.83359	9.52029	4.39447	6.88115	6.77768	3.77016	6.60189	3.74464	6.55916	7.05892	4.42631	4.99083	8.15514	7.90785	9.09334	4.84153	8.28539	8.47815	5.07931	6.51479	6.45907	4.80673	4.12232	3.76058	2.6225	3.678	2.47224	6.92377	3.48191	4.29366	3.6969	7.37339	6.47581	3.79466	6.6501	2.82862	2.90048	6.21693	5.46309	5.48445	6.41815
HTA2-neg-47423504_st	3.63021	5.01337	6.50434	2.32736	4.9982	4.68467	4.85815	3.9675	9.17819	5.15914	5.42006	4.80833	4.09503	3.16227	4.04739	4.9087	3.84037	4.07124	6.20813	5.26766	3.2718	3.53973	3.55701	5.2486	4.07182	5.25055	4.17806	3.17898	4.42251	3.38218	5.92512	3.69214	3.40028	3.66823	5.41982	4.54676	3.29233	4.64999	3.84949	4.69031	3.20508	3.687	4.58622	6.07859	5.27017	5.66466	6.59794	5.67624	4.39746
HTA2-neg-47423506_st	8.56414	7.22077	5.22387	4.28223	8.53552	6.99158	8.70127	7.00332	3.76467	4.89522	7.39946	6.96733	2.5826	6.15416	6.2724	5.18685	5.51532	7.17509	8.07829	4.77893	5.92797	6.4506	6.17949	5.2126	6.73359	5.29891	5.61709	5.25855	7.35392	8.07671	7.28823	3.20454	2.6225	4.11273	2.37461	4.63261	3.3381	3.17825	5.72278	4.94283	5.52592	5.51156	5.41645	4.70772	2.6088	4.18716	4.98924	4.56105	3.05103
HTA2-neg-47423512_st	8.72638	6.50324	6.95964	5.97991	7.17959	5.51011	5.52556	4.48601	5.98158	6.79315	6.70419	7.07731	6.42448	4.25271	5.2114	6.83161	5.32313	6.27774	9.57335	8.78122	6.97805	7.38321	7.4061	6.53747	6.3042	7.26285	6.87321	7.42171	9.10549	6.69986	6.556	7.16902	6.98928	6.87292	4.24517	5.52288	6.66164	4.77485	6.12881	5.21399	5.54497	4.49389	5.52786	6.15989	6.34757	5.94959	6.18171	6.74464	5.91029
HTA2-neg-47423515_st	2.3801	3.14579	2.6311	2.44702	2.4316	2.11123	2.26566	2.52287	3.89693	2.27926	2.41593	2.5913	2.61984	2.25516	2.81139	2.11801	2.31287	2.38829	5.45206	2.82572	2.55618	2.6552	2.74733	2.60785	2.96744	3.17728	3.38099	2.46971	2.81381	2.78514	2.53514	2.6494	2.84332	2.25536	2.58567	2.51631	2.80837	2.40906	3.34008	2.62163	2.41569	2.31796	2.82456	3.14708	3.07223	2.13695	2.51292	2.78457	2.61651
HTA2-neg-47423527_st	2.90479	4.7855	2.25515	2.63125	3.00323	4.76574	4.29566	3.72807	2.43838	2.66774	3.9364	2.03767	2.5826	2.7692	3.43857	2.62254	2.62963	4.54674	3.12217	3.34076	2.17734	2.36157	3.58246	2.54444	2.34791	4.33475	3.69705	2.37785	6.2861	3.84651	3.91939	4.32769	2.76952	3.03319	2.69303	2.16113	2.20125	3.62088	2.13498	3.16542	2.12202	4.01776	5.28557	2.17871	4.83286	6.26791	1.91287	2.7314	3.4314
HTA2-neg-47423532_st	13.2736	12.8502	14.4374	11.877	11.635	9.34928	12.1379	9.71152	12.9424	11.6777	9.51392	11.4981	12.7997	9.10065	10.7464	10.5929	13.4509	9.81971	15.3096	14.497	11.718	12.1027	13.8187	10.4135	11.8231	12.2505	11.3148	11.2184	4.0652	11.1617	14.8124	9.89379	13.3007	9.61106	10.4449	8.51933	10.3461	9.26731	9.50351	9.13993	8.331	9.40944	8.3854	8.34653	9.25123	8.9789	9.11508	9.64225	14.1985
HTA2-neg-47423543_st	2.58597	4.49667	2.86543	3.64333	3.22789	2.74415	3.76048	2.85282	4.95252	4.83623	3.39762	4.01948	4.00991	2.85702	3.59719	3.31703	3.52879	3.71427	6.62453	3.85441	3.63577	3.64564	3.82246	3.68296	3.38113	4.92608	5.1662	3.30805	5.09916	4.52372	2.32928	2.42479	3.02024	4.27576	2.73961	3.11884	4.0306	3.69681	3.70258	2.26335	3.52387	3.00944	5.20344	3.84358	4.41675	4.12985	4.08224	5.08936	4.06999
HTA2-neg-47423546_st	9.65368	9.32793	6.7929	7.03269	8.96939	8.19095	7.46041	7.94757	8.71813	7.61159	5.9678	8.27891	7.36101	5.79237	6.69763	7.16418	9.73822	7.57441	10.3347	9.00743	6.15254	8.27368	8.78956	6.84921	7.96828	8.59434	8.07765	7.88012	9.25495	7.16423	8.52783	7.53032	8.16848	7.12278	5.98887	5.8938	7.504	6.77516	7.95235	7.06657	7.79441	6.23309	7.25639	6.69814	6.83536	5.60602	6.81666	6.70899	9.72055
HTA2-neg-47423547_st	3.26274	2.88165	4.69566	3.46172	3.71514	3.2673	3.05753	3.39382	3.67347	2.88297	3.32318	3.84923	3.48216	2.93891	2.98945	4.25767	2.84862	2.7299	3.67854	3.72594	2.50385	3.49521	2.85423	3.66908	3.7924	2.79567	2.26441	4.68771	3.6931	3.46685	3.21154	3.39724	3.53666	4.2832	3.03653	4.16534	3.81115	3.17825	3.99462	3.89483	3.18193	4.48885	3.51989	3.02217	3.67259	3.51848	4.92822	3.06107	3.89148
HTA2-neg-47423548_st	4.90921	3.06981	4.3139	2.94795	3.07551	3.33665	3.93637	3.27359	5.2962	4.0107	3.53179	4.94416	2.58019	5.46949	2.71515	3.5769	5.19081	2.49124	4.63943	3.32008	4.57704	4.68588	3.35288	4.07628	3.12507	2.921	3.88498	2.95844	6.29754	5.0157	6.19618	4.19319	3.80428	4.25041	3.56496	3.07886	5.38689	4.13904	4.44457	6.39946	3.33407	2.50008	3.30196	5.09004	2.74279	4.83567	2.90791	3.07434	3.82582
HTA2-neg-47423568_st	7.94253	8.72097	6.14112	5.01171	6.27948	5.95043	5.85328	6.16627	5.5014	4.75869	5.64374	5.67991	5.8063	4.74442	6.44835	6.05964	6.3919	7.26471	7.31175	6.51939	6.97012	4.54962	9.18302	4.96598	5.87958	5.02027	6.4902	7.05925	7.61988	7.7408	5.86193	7.76065	5.8443	5.72783	4.6836	5.64737	4.97148	5.77026	5.7346	6.2464	6.43266	5.38132	6.50964	6.48795	6.52547	5.53624	6.97723	5.4993	6.13119
HTA2-neg-47423569_st	4.17464	5.19677	3.84014	5.42658	5.06209	5.29452	4.86089	4.76254	4.99988	4.41874	4.55881	5.01659	4.74198	3.95219	4.50518	4.74505	4.38975	4.24437	5.76779	6.47188	4.54513	2.77066	5.40141	2.54444	4.31759	7.23547	4.22944	4.59193	4.96435	4.68244	5.10673	3.8518	3.46772	4.31614	5.06849	4.05641	3.83822	3.23552	5.08295	4.56333	3.47623	4.27238	3.45235	3.8187	3.45895	3.32597	3.49696	3.44284	3.1534
HTA2-neg-47423573_st	3.32668	3.85673	5.20581	3.68281	3.51728	4.79065	4.535	2.95016	5.45299	3.9359	3.68969	4.70294	3.32055	3.67592	4.10271	4.78737	4.72413	3.79611	6.99305	3.38524	4.98449	4.3147	3.85451	4.45766	4.0215	5.39934	4.76793	4.62176	5.59131	6.05841	5.89196	5.46384	4.79704	4.00103	5.69919	5.1024	4.84896	4.06456	4.32873	5.3782	4.72844	4.61431	5.43205	4.12388	4.66947	3.8851	4.9451	4.74372	5.25376
HTA2-neg-47423590_st	6.2541	4.92596	6.29318	3.17001	4.51225	3.26305	4.29566	5.77373	3.34607	4.06666	5.63112	3.90774	4.29795	2.94809	3.56081	5.74932	5.84705	4.54674	6.0844	4.66993	3.74173	5.11457	2.81459	4.97159	5.26872	6.66908	4.35161	2.59882	5.08231	5.33746	7.81338	3.47425	6.98513	3.53498	5.18832	3.56191	4.05858	4.68084	3.34176	2.3692	2.92673	2.87108	4.72826	3.04036	2.34925	3.31387	4.80746	4.56105	4.66109
HTA2-neg-47423591_st	4.87568	4.21304	5.65648	5.37649	6.44084	4.97029	5.93285	5.38784	5.75498	6.76427	5.23464	4.6012	5.92553	4.10377	3.70536	4.9256	5.85515	5.27365	4.42285	6.01532	6.485	4.51011	5.66665	4.73068	5.33729	4.55765	5.9359	6.21322	4.97288	3.64591	5.71572	4.90575	5.11839	2.92615	3.18391	3.98903	3.8494	3.84346	5.27043	4.23623	2.96808	3.94762	5.17959	5.57506	4.92765	2.93824	5.53004	3.626	3.1718
HTA2-neg-47423602_st	4.13769	5.45757	4.50407	3.6213	5.21242	4.03684	5.5548	4.94679	4.52566	3.34882	3.94476	5.29599	4.39592	3.53148	4.25767	3.22412	5.01513	3.97639	4.52829	3.96286	3.83527	4.52647	4.4684	4.7938	4.28297	4.06068	4.07316	5.55081	3.19347	3.8161	3.80809	3.96572	3.49527	3.23961	2.82861	3.12948	2.83492	3.46767	4.18473	3.84314	4.30143	2.64711	3.6546	3.81599	3.19756	3.28086	3.17103	2.95936	4.58978
HTA2-neg-47423604_st	5.54841	5.20416	4.52204	5.36829	4.77954	3.36685	4.26013	4.32888	6.70401	5.04764	3.83945	4.54418	5.40087	3.65192	4.48845	3.91223	4.0735	4.16885	6.32695	6.36975	4.69956	5.34208	6.16809	6.3134	5.20204	3.12797	5.24863	5.01585	3.53069	4.14906	5.06409	4.79911	5.83073	3.82833	4.82596	3.22067	5.14443	3.28222	4.81631	5.70821	4.35127	4.05757	5.29487	3.7251	3.59145	4.38169	4.31895	4.45309	4.95292
HTA2-neg-47423616_st	6.01626	5.19365	7.07273	4.75474	2.63847	4.04157	6.1753	4.14412	2.95671	3.22283	4.79708	4.69889	3.14638	3.53662	3.14425	3.17532	4.89131	3.87291	2.90359	4.2291	3.24694	5.97191	5.78807	4.60828	2.57939	5.00931	3.39225	2.444	3.58892	4.407	3.33919	5.25682	5.1449	3.96428	3.80159	4.69441	4.22183	5.91151	4.80028	4.56282	3.38002	5.91201	4.40226	5.22727	5.7399	4.54144	5.27391	6.54503	4.22434
HTA2-neg-47423629_st	4.99736	4.56388	3.06702	4.82995	3.79435	3.07626	2.98552	3.03676	4.19947	4.34225	2.72518	4.11511	4.11105	2.9715	4.02735	3.69419	4.37072	3.24737	5.16359	3.67078	4.49035	4.43943	3.55405	2.95518	2.94245	5.30599	4.27401	3.37096	4.52669	4.07756	4.25592	3.58291	4.375	3.7205	3.84519	3.05275	5.14392	4.43997	3.52166	2.53273	3.58423	4.07077	4.88189	3.14964	3.65435	3.92686	3.72894	4.99479	3.48993
HTA2-neg-47423631_st	6.59414	5.65333	5.04654	5.48931	5.77283	4.63061	3.68434	4.61972	6.16445	5.45701	3.86192	4.51054	6.54879	3.74967	3.4694	5.15477	6.29264	4.87851	5.4301	6.57924	5.28406	3.32142	5.96627	4.71037	4.00776	5.20709	5.83354	4.706	6.70138	4.98665	5.8085	6.05868	4.95412	4.90922	5.72393	5.58937	5.54131	6.60935	3.65255	6.27955	4.69616	4.96711	4.30984	4.43926	4.48398	3.35361	5.31457	4.7019	4.92898
HTA2-neg-47423669_st	4.4861	4.99274	3.83787	2.58677	4.22612	2.30204	3.79979	4.11843	3.94413	4.22717	2.66653	3.75329	4.13492	3.38395	3.88622	4.74163	4.78215	5.09382	3.9331	2.96979	3.42488	4.20701	3.13203	3.77437	3.04883	3.00351	5.53402	2.93978	2.62991	4.01705	5.07004	4.37658	4.11365	5.07998	5.17266	3.70641	2.48952	2.95299	2.86009	3.80417	2.37243	5.25977	4.56676	4.93511	4.40738	2.65475	4.76693	4.64154	5.53517
HTA2-neg-47423694_st	6.52231	5.95444	6.1313	7.82457	6.74711	7.06514	6.79751	5.70927	7.49761	5.89991	6.35737	5.53751	8.09966	4.72457	5.55634	5.57134	6.77414	6.1014	7.43926	7.98469	5.84083	5.81701	7.29874	5.12791	6.14492	7.72543	6.91747	7.58077	6.26695	5.81958	6.14461	4.68787	5.02268	5.51184	6.44797	4.98075	6.24397	4.99443	6.16964	5.77749	5.17103	3.72358	4.95688	5.27326	4.98533	4.63439	6.40918	5.74779	5.90552
HTA2-neg-47423696_st	6.42461	5.78262	7.06404	4.82212	4.98255	6.34157	3.78763	4.68167	4.54191	6.87615	5.71527	8.03879	7.72349	4.11371	5.47797	5.1535	5.72893	5.6837	9.34848	5.20134	8.0153	9.64691	5.46149	6.77058	5.17926	7.2865	4.9854	6.79167	6.54243	7.58511	4.35541	5.46543	4.01362	4.30883	3.79625	4.44284	4.00206	3.52076	5.93272	5.85455	4.48681	4.86884	3.00188	5.44144	4.28317	5.37219	4.86662	6.49504	5.23425
HTA2-neg-47423697_st	5.8214	4.84228	4.36737	4.66033	5.31965	4.38158	4.02008	4.5717	4.06068	4.61531	3.68798	4.04681	5.10874	3.89419	4.72467	4.3743	3.63572	4.81401	3.9649	4.61928	3.81899	6.32914	5.09127	4.44299	4.22637	5.18723	3.84114	4.37837	3.49698	4.1569	4.03538	4.39309	4.63428	3.90911	3.59474	2.60646	2.87016	3.38255	4.20746	3.64221	3.91946	4.82726	3.54737	3.3218	3.48825	2.87575	2.5418	3.43856	3.79822
HTA2-neg-47423726_st	3.55067	3.93802	4.65708	7.55999	3.71315	3.3217	3.39248	3.70347	4.24251	3.41585	4.00266	3.84118	3.72658	4.97138	3.20349	4.0191	5.02271	4.35566	4.49663	3.71577	6.31625	4.4555	3.43714	4.50335	4.26628	4.42436	4.57262	3.11905	4.87043	4.1059	7.9683	5.38802	5.37141	5.07515	4.97289	4.05295	4.39554	5.00138	3.44675	4.20347	6.35142	6.24941	5.18624	4.17778	4.24513	4.48024	4.64789	5.75303	6.94969
HTA2-neg-47423728_st	3.73664	3.33514	4.01756	3.64288	3.9547	3.98327	4.06984	3.22048	3.17953	3.56575	3.76549	4.30226	3.59867	4.45133	3.74269	3.96165	3.27865	4.34125	4.56527	3.1418	3.90747	3.96841	3.49723	3.72819	3.64558	4.27146	4.53243	4.51603	3.06659	3.64866	3.22158	2.92783	3.78855	3.18098	3.50091	3.47894	3.02609	3.42336	3.33062	4.53355	2.70162	2.90356	2.66831	4.05108	3.39774	2.66352	3.81385	3.09998	3.81545
HTA2-neg-47423736_st	4.93472	4.89701	4.80117	5.33516	4.89048	4.6139	5.40434	4.36947	4.83152	4.72733	4.98997	4.69665	4.36427	4.11517	3.86188	4.67961	5.40918	4.16236	4.44393	4.24518	4.10835	4.55295	5.44333	4.13756	5.88764	4.72959	3.41783	5.27986	5.30769	5.2787	3.83909	3.90705	3.82357	3.83109	4.7459	3.6928	3.4017	3.90673	3.07383	4.22232	3.86473	4.13	4.28969	4.35283	3.44134	3.43525	4.5206	4.76153	2.78454
HTA2-neg-47423764_st	4.35946	3.36379	4.82385	3.76197	3.73441	3.38361	3.17493	3.76425	5.18088	4.46228	3.73554	3.70528	4.87432	3.67351	3.12846	3.8096	4.11711	3.12485	3.81308	4.69029	4.3557	3.57909	3.84971	3.52182	3.52422	4.67543	3.71165	4.57745	4.57334	4.43681	5.09797	3.99741	3.24068	4.439	4.03453	4.16637	4.09884	3.29973	4.41531	3.99707	2.50954	4.03408	3.63712	3.52817	3.83467	2.66841	3.42872	4.06746	2.99437
HTA2-neg-47423769_st	3.90231	3.89379	5.44863	4.39725	3.72031	4.0116	5.13708	3.89802	4.1885	3.65554	3.18563	4.35971	4.04839	3.53568	3.79706	5.31038	4.25915	4.66295	3.90781	4.55985	4.80743	4.65557	3.7717	3.76786	3.99035	3.97915	3.94731	5.66356	4.52112	4.63306	5.50814	3.05658	2.97552	2.89824	3.19898	2.67194	4.46358	3.85245	2.93997	3.61352	3.17834	4.22231	4.41565	2.73439	3.50028	3.24483	3.35123	3.72842	3.24614
HTA2-neg-47423794_st	6.46406	4.96032	6.03581	4.22037	5.8253	4.52521	6.45429	5.94002	5.81954	4.07725	5.97004	5.36135	5.75539	3.7797	6.07586	6.70192	4.49253	4.50947	4.30532	4.25229	5.76101	5.6675	2.9536	4.52694	5.49939	5.01057	6.16751	4.77678	5.17399	5.20901	7.26737	6.00177	6.46198	5.7866	6.33944	5.39605	5.33975	5.60662	6.74703	4.25565	5.21715	3.6108	4.42554	5.02644	6.19378	5.79399	4.23287	4.43039	5.46458
HTA2-neg-47423802_st	3.96759	3.54028	2.80886	6.09497	4.30786	3.08078	3.9528	5.5758	3.06667	3.57682	3.15079	3.2242	3.27368	2.79522	3.71198	4.01365	3.81151	4.00233	3.24427	4.47928	3.80432	2.69483	4.23619	2.83204	3.54239	4.38399	3.37615	4.08462	3.99284	5.12126	4.73036	4.16186	4.26471	4.02358	4.21071	3.37322	4.05703	3.37917	2.96908	2.98803	2.55313	3.80664	3.49733	3.684	2.59221	3.64311	2.65854	3.46873	2.77413
HTA2-neg-47423805_st	4.23607	3.26157	3.58605	2.99241	2.41812	3.24101	2.50902	3.32834	4.4141	4.10655	3.32144	3.94655	4.3194	3.62618	3.40506	2.98039	3.94632	4.31195	2.54243	4.66179	2.76933	2.86475	4.01975	5.52262	4.02989	4.52598	3.30813	2.62242	3.93723	5.22653	6.4227	4.21349	2.80802	3.60844	4.39404	2.82639	3.00214	2.934	3.37406	3.45814	2.31417	2.77935	5.33149	2.6796	2.95481	3.63547	3.50571	3.42688	2.37564
HTA2-neg-47423820_st	6.12936	2.68452	2.94822	3.30702	4.61088	4.0003	4.38726	3.85797	5.06421	3.64667	3.60025	3.4783	5.05423	3.56314	3.56441	3.80874	3.64284	4.7614	4.09824	4.89941	4.30801	2.91925	4.76565	3.37692	3.53204	4.10996	3.28415	4.3043	5.25527	3.2721	5.28428	3.62935	3.84564	4.31399	5.42223	2.78992	3.98338	2.9596	3.34119	4.63031	5.08895	3.21787	3.96029	3.79935	4.41967	4.48493	3.89557	3.93848	4.63265
HTA2-neg-47423824_st	3.52158	4.80092	4.45473	3.88685	4.76043	5.47723	5.52899	6.46077	4.17657	5.30556	5.15339	4.72187	3.12058	3.46304	4.06438	4.09035	4.80514	6.37748	4.30532	4.12618	5.52077	3.22581	3.99793	3.29673	2.94361	3.98646	5.07931	3.46923	4.84896	5.9458	3.57969	4.63748	5.35374	3.0154	3.93094	4.69304	6.14422	3.48501	4.06539	3.47678	3.7079	2.89471	3.4076	2.36074	2.90048	3.54028	4.93039	3.72093	3.33709
HTA2-neg-47423835_st	4.5792	4.02618	5.12016	4.97092	8.57125	4.25934	3.61469	4.00996	4.76435	4.65601	4.07782	4.587	4.90265	3.21331	4.32327	4.66304	5.99424	3.50823	4.52921	5.26366	4.83618	5.18797	4.32976	5.08851	4.69947	5.29725	5.60463	4.67323	5.86979	5.11281	6.39618	3.55868	3.47559	3.48378	4.83703	4.68882	4.68351	3.57445	4.76619	3.93936	4.03202	4.73258	5.33251	4.3697	3.94386	4.0669	4.36441	2.98962	4.89979
HTA2-neg-47423838_st	3.42317	3.15199	2.36864	3.15565	3.43264	3.91638	3.42582	3.40104	5.75594	4.69197	2.69494	3.82356	4.51306	2.79544	2.97815	3.33323	3.05084	4.12799	3.60909	2.7857	4.21452	3.09926	4.17028	3.17992	3.78245	3.03503	4.23258	3.49722	3.91267	2.77267	4.50434	3.21481	4.40122	3.80917	4.37439	3.91646	3.7358	3.54847	3.43276	4.70864	2.88396	3.1091	4.42882	3.05455	2.40486	3.51509	3.70527	4.09487	4.46933
HTA2-neg-47423840_st	12.6978	10.7518	9.99233	13.0441	10.5834	9.53323	10.3912	8.89491	13.9598	12.6708	8.28445	8.84078	13.4403	8.56911	7.97125	9.11958	10.9042	8.89454	12.9639	15.8712	10.7969	9.94182	14.1886	10.4424	10.7613	12.756	10.7379	11.9899	12.2947	9.44143	8.83433	6.5554	9.23145	9.35593	9.58661	7.84158	8.87483	7.59602	9.69071	5.67657	8.9912	7.0865	8.926	8.43374	10.0627	7.28623	8.02722	8.70066	10.8524
HTA2-neg-47423841_st	5.53066	5.07103	4.76595	4.43356	3.50895	4.18284	4.9896	3.1231	3.01655	4.30876	5.4464	3.56857	6.41536	3.19377	3.01429	6.03904	3.97841	3.91577	4.66818	4.18188	4.93566	4.70121	4.24869	4.48833	3.95607	3.29937	5.85981	5.50889	4.55816	3.53645	3.67951	4.73217	3.33169	4.23008	1.96293	3.73847	3.68404	2.58385	4.70868	5.22328	2.61201	5.51378	4.54415	3.20203	2.34925	3.31609	3.67951	4.53832	3.05325
HTA2-neg-47423846_st	2.6158	4.06663	3.41805	2.9706	3.0496	2.62884	2.64159	3.41502	4.87624	2.93773	3.85974	2.3622	2.85082	2.69581	2.90644	2.67491	2.93688	3.20422	4.0751	3.04453	4.19336	3.5328	3.0767	2.66794	2.67076	3.88128	4.93947	3.05422	3.08304	2.89117	2.38645	2.48796	2.60356	2.83181	2.753	2.37503	2.96608	2.66752	2.40725	2.32028	2.69586	2.92112	3.70301	2.89942	2.85485	2.33121	2.47247	2.38994	2.63039
HTA2-neg-47423847_st	5.04976	4.79282	5.69178	4.61988	5.35222	4.91268	3.93638	4.93643	4.94954	4.41114	3.45752	4.51587	4.65318	4.10421	4.56165	4.92707	5.25617	4.80493	5.62764	6.03596	5.73381	4.80394	5.45554	4.79661	5.55791	4.80076	4.21808	5.01707	4.92855	4.96763	3.77875	4.47337	4.55323	3.34974	4.06443	3.70168	4.39087	4.2055	3.31371	3.60311	3.12521	3.01471	4.16473	3.60046	3.4413	3.26483	3.861	4.16622	4.56652
HTA2-neg-47423848_st	4.65975	4.84252	6.64923	4.88411	4.37338	4.20871	4.5363	3.94296	5.62624	3.66061	3.45769	3.90208	4.77289	3.57394	3.88933	4.10567	4.96937	4.04723	5.40329	7.56074	4.31141	5.04537	5.1783	4.55112	4.51822	5.10385	4.25413	4.78386	4.61048	4.97356	5.2745	5.16295	4.30349	4.5357	4.85392	4.33265	5.50739	4.63941	4.52204	4.2229	4.48384	3.458	5.27482	5.31037	4.03247	3.63547	5.94686	4.54481	5.50665
HTA2-neg-47423852_st	6.85425	5.61133	5.53479	6.01243	7.14533	5.61656	5.99121	5.39026	4.45184	8.51984	6.42266	4.20498	6.32927	4.45447	5.80569	5.56216	7.0387	7.67341	4.88089	7.20305	5.05154	4.80006	5.88323	3.65455	7.27635	6.52116	5.6891	4.68581	5.05591	6.59291	4.90628	4.05494	6.68468	5.2213	5.21396	6.95286	7.2111	2.74662	3.60564	7.06719	4.8642	5.66901	8.10125	4.90628	5.3384	5.89208	5.34302	4.90628	6.71122
HTA2-neg-47423855_st	4.61812	2.36425	2.89061	2.69237	4.50756	3.26774	3.47123	3.36553	3.54918	2.9411	2.51422	2.72476	2.20944	3.22391	2.38874	2.72083	2.45204	4.40591	2.62404	3.11955	2.98124	2.67539	2.69207	2.80187	3.74664	5.15499	2.78081	2.83022	2.95693	3.32722	2.86598	2.80861	3.52999	2.69657	2.38731	4.37068	2.71357	2.466	2.80872	3.10888	3.03295	2.65118	3.24094	2.69281	3.58141	3.40033	2.15239	3.5356	5.0335
HTA2-neg-47423889_st	4.14575	4.47842	4.64069	3.30076	3.32779	3.84804	3.60354	2.99374	3.31458	2.80031	3.99005	3.9877	3.05201	2.59625	3.43077	4.31017	3.45231	3.43672	3.3329	3.63517	3.87455	2.83673	3.59243	4.261	3.96169	3.51885	2.75182	2.75556	3.02807	3.99098	3.06138	3.60899	2.79098	2.63564	3.37892	2.8674	4.17219	4.17163	2.24953	3.31424	2.39559	2.50914	3.40136	4.10336	3.08454	2.15146	3.05911	2.75863	3.44355
HTA2-neg-47423900_st	5.63035	4.41242	5.17273	3.08451	3.81517	3.86936	3.66144	3.33322	6.54581	3.57801	5.0483	3.4137	4.03513	3.03568	3.36633	3.58605	6.29396	4.50726	3.14747	6.21135	4.09725	3.48022	5.57197	4.67853	5.04872	4.32395	3.71118	5.07502	3.9533	2.86648	2.7935	4.11051	5.33527	3.47456	4.58698	4.17637	4.01	3.70368	3.47361	2.85843	3.41366	2.59479	4.13141	3.06359	2.95217	2.7319	3.37006	3.55275	5.23823
HTA2-neg-47423908_st	4.28881	3.82105	5.03635	3.7199	3.66759	2.95897	6.13563	3.34987	3.47425	2.9411	3.44586	2.85491	3.76683	2.23864	6.30819	5.0811	9.3414	2.95897	2.20164	2.45411	6.44363	6.79821	4.64358	3.59149	2.25258	8.05092	2.26537	3.25042	2.81459	2.81847	3.17672	3.33729	3.06415	4.86049	3.95385	3.56191	3.91283	2.58385	2.63203	3.23812	2.61201	3.79466	2.67008	2.69924	2.90048	2.65066	4.12232	2.64827	2.40203
HTA2-neg-47424007_st	5.09702	4.99652	3.82766	5.56326	3.95834	4.94163	3.44844	3.2781	3.6324	4.74494	3.42715	4.64166	4.32354	3.32873	4.03274	4.66067	4.20625	2.87032	5.96211	3.32981	5.07283	4.21221	3.95036	3.59615	3.77145	3.70942	3.42974	4.65264	4.71011	4.03406	3.14742	4.01977	3.17479	2.7807	3.01373	2.48713	3.41936	5.26488	3.33357	4.0803	3.50223	3.67316	3.7507	2.86061	2.96422	2.96848	3.62315	2.93632	4.19826
HTA2-neg-47424009_st	4.27306	3.47014	3.41266	3.26605	4.7558	3.24581	3.15219	3.8128	5.66378	3.49278	3.04881	4.05126	3.9282	2.90501	3.43012	4.08788	3.11594	2.74758	3.3563	4.46724	4.21433	4.15548	3.30704	2.96178	4.11014	5.35565	3.27693	3.8312	3.89649	3.13983	3.20303	4.15406	3.76176	3.58441	4.52254	2.84983	3.59419	3.71898	3.00849	3.35016	3.31651	2.92127	3.16518	3.28863	3.62272	2.98859	3.91593	3.3062	3.84317
HTA2-neg-47424016_st	8.7426	3.6425	6.63791	5.58629	5.68899	5.13026	5.90317	4.34322	4.53371	3.90688	4.71358	3.61238	2.82751	3.81289	3.08651	3.82404	4.51577	4.65076	5.869	5.49329	4.21629	3.51819	3.55369	5.84673	4.10752	3.15646	4.85234	4.20201	2.96739	4.00149	5.82103	4.13661	5.28829	3.9871	4.59039	4.59161	3.76315	4.59219	7.46955	4.11129	4.62852	3.61377	8.33146	4.50983	6.762	5.82695	4.62858	4.34317	4.63599
HTA2-neg-47424018_st	5.12188	3.74655	4.46147	3.9868	4.65101	5.0912	4.80498	4.13071	4.97728	3.91078	6.5469	5.82337	4.92408	4.4142	2.90872	5.06893	4.03134	3.68774	5.70944	5.38236	5.70911	3.8924	4.36469	4.5386	4.06223	4.99873	4.62891	3.5605	5.3423	4.4997	5.17629	5.66397	5.56997	4.93352	4.6284	3.70181	5.96216	4.26406	4.6888	4.46471	3.30252	4.96559	4.0675	3.84088	4.37825	4.80554	4.85681	4.0329	4.84829
HTA2-neg-47424020_st	4.53974	4.29634	11.6013	9.07792	6.14689	6.10741	9.84377	10.7321	5.72525	8.45368	5.96118	5.51182	6.77749	7.73546	7.41565	7.97422	4.00127	7.59252	7.62094	10.4267	4.57455	10.7266	5.8	7.45573	4.11958	6.5913	6.84593	5.55422	6.28384	4.91276	7.58204	9.79982	7.06134	7.26497	7.85137	7.454	7.31351	6.70625	7.67054	8.37488	5.87287	8.60343	9.65259	6.19605	8.63672	7.77597	8.96546	6.22885	8.15616
HTA2-neg-47424023_st	4.71213	4.26089	5.99302	4.04022	4.88006	5.04176	2.96789	5.92373	2.94927	5.51408	3.20345	6.22935	5.2716	4.92263	3.35518	4.20463	6.20671	4.63716	4.87861	5.99002	6.52311	4.49843	5.74407	5.36929	5.4212	5.16719	3.92686	4.15961	6.5607	5.496	6.68285	4.04048	5.19579	4.89579	5.64594	4.61633	5.38889	5.12403	4.08968	3.74982	2.98352	3.71408	5.57688	4.0493	4.74824	4.52458	4.86282	4.71453	5.65359
HTA2-neg-47424024_st	4.29209	3.41846	3.978	3.7853	4.01839	4.34106	5.007	4.3249	3.5233	3.72846	4.0755	3.75986	4.68163	3.75989	2.75052	3.77794	3.71067	3.16497	3.08604	3.50769	3.47325	3.89927	3.81626	3.6505	4.28023	4.68064	3.77311	4.11047	4.76416	3.53593	4.15536	4.07195	3.67717	3.59348	3.33796	3.76623	3.43801	2.83811	4.06417	3.57441	3.6646	5.14447	4.35407	3.99356	3.65382	4.76019	3.23223	3.39505	4.67713
HTA2-neg-47424025_st	4.46042	4.94095	5.30822	5.07701	4.57808	3.99202	4.24932	3.97412	3.77813	5.00432	4.15811	4.49707	4.71538	4.30496	4.91718	4.5583	4.37962	3.74023	5.12579	5.60021	5.18437	5.11519	5.14616	5.23415	4.79987	4.97961	4.22709	3.87129	6.3171	4.21588	6.26556	4.64811	5.35613	3.72052	4.89737	3.38389	5.35058	4.16101	4.79718	3.90479	3.41274	3.48737	3.76643	4.01661	3.75421	4.17565	4.89509	4.78984	5.22905
HTA2-neg-47424026_st	3.30368	3.82105	3.62346	3.00091	3.1288	4.47001	4.81999	4.10629	2.78196	2.53218	4.27527	2.85491	2.94355	3.61498	2.37294	4.84361	5.29614	3.44947	2.85638	2.7244	3.81876	4.40915	3.38187	2.16854	3.0435	3.30984	4.35161	2.96357	5.20788	2.38802	4.54402	3.90615	3.04377	5.71596	5.53484	3.55318	6.92139	4.09115	2.63203	5.32005	4.35327	4.36177	5.19581	5.18156	6.22137	2.90048	4.58334	3.6378	3.10064
HTA2-neg-47424027_st	3.26421	4.78369	5.07262	3.42555	5.02147	3.41296	4.15818	3.33918	3.75668	3.30357	3.20655	4.19844	3.75009	4.55303	4.35781	4.48196	3.17715	3.27504	4.53633	4.22147	3.27227	5.44536	3.15225	3.65109	3.89326	5.89041	7.1421	3.75507	3.3865	4.7352	6.97649	5.05874	4.39239	4.73326	4.10377	4.78919	5.49618	4.52854	5.20698	6.15011	2.92568	5.13433	4.64849	4.45837	3.47568	4.9343	4.20728	6.03601	4.05216
HTA2-neg-47424034_st	7.6401	7.95274	3.3874	14.2258	3.50895	13.5513	4.54958	2.52287	5.23769	4.17045	6.77602	10.9595	5.50405	11.14	8.03828	6.28936	5.51532	10.7485	7.75484	5.08782	6.84986	8.94514	3.07394	7.46836	4.5578	8.61735	5.89698	9.54357	6.2861	3.24894	3.35056	9.39013	2.76952	3.03319	10.4187	10.6304	13.2306	8.08011	5.07803	6.22265	7.94162	9.2665	2.83737	8.45148	10.2909	7.94814	9.18845	2.33537	3.4314
HTA2-neg-47424036_st	10.0954	10.9074	11.2333	7.92872	11.0088	8.76344	9.30179	9.43191	10.1019	9.39442	8.33763	9.77761	9.0835	8.1605	9.09522	8.69927	9.57571	10.9302	10.1265	9.34172	10.0997	9.51688	8.91739	8.86055	9.91006	9.89345	10.4961	8.07969	9.33543	8.86845	9.93425	10.6232	11.5023	9.55984	10.2146	9.51661	7.6005	9.02077	10.6645	9.27374	10.4266	8.2327	12.2725	10.3144	9.73384	9.77966	10.2184	9.39976	9.72285
HTA2-neg-47424037_st	4.99122	3.16624	4.21658	4.28548	2.54247	2.97009	3.53007	3.75368	3.94823	3.78288	3.72077	2.48491	3.97741	2.74642	3.03816	4.04541	2.72084	3.01251	3.28318	2.67614	4.61887	2.83469	4.53999	3.31425	5.5157	2.95715	3.70572	3.10164	3.58543	3.37447	4.21718	2.98738	3.02309	3.10056	3.18755	3.10354	3.67887	4.26132	2.71731	3.19019	4.58944	3.54547	2.3799	3.02844	4.30185	2.88441	3.83044	3.62427	3.33516
HTA2-neg-47424041_st	4.30797	5.39094	8.96329	6.2958	5.29556	4.59087	8.47725	3.73052	5.10506	4.88299	2.92412	3.40568	6.69512	7.01056	4.09089	4.16667	8.4495	4.58544	5.71653	5.26635	8.48471	6.20092	6.12893	3.1988	5.90395	4.68296	2.99627	3.99916	5.54066	4.82369	3.87781	7.3564	4.87805	5.63506	4.6262	6.31616	6.25625	4.42436	4.85494	5.63641	4.34745	6.09264	5.20735	3.59282	5.14073	5.76955	9.58136	5.19253	5.69567
HTA2-neg-47424043_st	8.97393	7.41773	8.84103	4.09328	5.29555	6.09624	4.90847	4.46422	6.29821	5.29006	5.46686	8.2511	6.35485	5.36162	5.81092	7.493	6.92553	6.75507	9.39829	7.0912	9.01909	5.93966	7.47661	7.08277	8.42609	6.28409	5.38264	7.65332	8.37167	8.43925	5.547	5.98073	6.81585	5.20079	3.94548	4.41145	5.52102	4.2713	5.06467	4.92875	4.99887	5.95652	5.31921	6.64887	4.20501	6.9646	7.47001	3.93225	6.38725
HTA2-neg-47424044_st	3.1147	2.84017	5.50803	3.5909	3.06755	4.36244	3.84865	2.90489	4.58703	4.55913	5.26895	3.20334	3.83383	3.82223	3.12601	4.76397	4.19183	4.0427	3.46963	5.65721	3.01105	4.68322	4.80495	3.91182	3.66197	4.81683	3.25507	4.06382	5.35935	4.70163	3.70757	2.81416	2.90158	3.49342	2.68861	3.55087	3.11635	3.05628	2.91124	3.467	2.57347	3.81753	3.43936	2.78309	3.04856	3.19759	4.59444	4.88073	4.41043
HTA2-neg-47424053_st	5.85796	5.43681	6.55965	5.53979	5.44861	4.94735	5.23726	4.34008	6.50112	5.02559	4.34914	3.6495	6.62527	5.50013	6.8723	3.71835	3.72251	5.8715	5.03097	4.38155	5.59231	4.06149	6.15105	6.01761	4.87451	4.66974	3.8462	4.22959	3.79829	6.74051	6.60703	6.18296	7.46052	4.59365	6.09501	5.18193	5.60601	5.42605	4.04901	5.27342	5.81347	5.71302	6.82498	6.62977	5.71388	4.18924	4.52334	4.6717	3.83354
HTA2-neg-47424055_st	5.88356	4.3202	5.80902	5.82407	4.29327	5.75673	5.98536	4.90473	6.81955	4.27174	4.23947	5.91643	6.30527	5.0486	4.26768	7.21336	5.33714	5.47075	6.46418	6.01183	5.75087	4.91155	7.61346	6.93905	4.55625	5.76396	5.31047	5.09681	4.7685	4.18326	7.94699	5.11968	6.19475	4.74338	4.09542	5.98858	6.13652	5.13952	5.25314	4.00141	3.8739	5.81827	3.20881	4.67795	3.4626	4.04557	5.52151	6.40754	10.1759
HTA2-neg-47424057_st	7.85584	6.58736	5.93655	5.11012	5.83321	4.15266	4.89566	4.33475	6.65004	4.92627	5.92142	7.09765	5.59423	5.32982	4.36287	4.851	5.51532	3.2021	4.86487	5.15074	4.42742	3.69874	5.81124	5.90753	3.95607	5.99568	5.07931	4.79522	3.54171	4.37718	6.34221	3.97745	4.15573	4.87212	4.20184	3.70525	2.98736	4.71483	2.63203	2.72453	3.13918	4.82621	4.04136	3.80817	4.51043	4.7489	6.60374	2.81802	6.04029
HTA2-neg-47424061_st	2.86918	3.33331	2.60565	3.51095	2.94338	2.65813	2.49561	2.70321	3.81371	3.43	2.91056	2.96163	3.70929	2.96893	3.04348	3.25871	4.28723	3.47013	3.11296	4.36985	3.4002	3.48748	3.3904	3.08758	2.83601	2.74021	2.68849	3.25014	3.0873	2.96521	3.34868	2.92241	2.84608	4.0484	3.59938	3.12248	3.46671	2.7165	3.20083	2.76163	2.47262	2.89312	4.13456	2.88575	2.80711	2.52037	2.65259	3.4721	3.36403
HTA2-neg-47424062_st	4.0777	6.04855	4.88502	5.64833	4.83614	5.43032	6.57873	5.29236	4.07875	3.10562	6.54372	6.09243	4.29795	4.68719	3.59291	4.77667	7.21761	4.30969	12.5618	6.57416	4.80006	8.3748	3.2563	6.14763	5.01305	6.3913	5.53426	5.95336	8.08659	6.08971	9.45839	4.74409	7.87857	5.57758	2.90698	4.63262	3.03878	4.06506	3.91042	5.40694	3.15068	3.15068	5.69905	3.00951	3.07301	4.0861	4.91996	5.66509	3.53736
HTA2-neg-47424102_st	8.45138	3.46395	5.21243	8.00247	6.26276	7.24427	4.37557	6.00765	7.24355	6.81222	3.80183	3.35758	3.49759	6.00263	4.15818	4.53653	4.01934	2.76115	5.78695	4.075	5.97789	3.75143	8.54057	3.92035	2.67007	9.06911	5.31047	5.25855	5.20249	5.41413	6.42998	3.06856	7.53704	5.32726	7.04344	2.59426	2.99132	2.99155	4.52004	3.47181	2.78386	2.5624	2.83737	7.5255	4.20673	2.65066	9.89827	5.32428	7.31374
HTA2-neg-47424198_st	2.88792	5.19755	3.43473	3.45096	6.18206	5.80569	3.58402	4.69375	4.28223	3.59509	8.26679	3.10653	3.20068	3.95452	2.86024	2.90349	3.73042	5.01299	2.85638	4.42675	3.58739	2.67278	2.75255	5.90754	3.67349	3.40312	3.978	3.57113	3.29756	3.22904	3.52838	2.48731	5.08901	3.61375	3.04921	4.36704	4.62473	5.12393	3.44108	3.0885	2.59033	3.24043	3.96974	3.52615	3.78842	4.43751	3.52838	3.71181	3.92342
HTA2-neg-47424228_st	5.60369	6.32231	5.03635	4.58818	4.10307	3.36926	5.46805	5.04294	3.67645	3.84705	3.46863	4.80634	3.27849	4.00101	6.18888	5.0811	4.17592	4.69263	5.57725	5.26501	8.88644	7.07718	6.08298	4.90637	7.93816	5.41873	6.13061	5.47375	6.30063	6.23668	6.1359	7.50603	7.32889	4.06783	4.66731	6.12299	8.05046	6.7322	6.83572	8.03724	6.10546	4.18875	9.17906	8.39655	5.95954	8.39959	6.1359	8.40386	8.79771
HTA2-neg-47424232_st	13.9016	6.86226	4.52759	7.5952	7.42307	5.41609	7.2165	7.08086	6.37948	5.50702	7.21219	5.62982	7.2085	3.27849	5.70893	6.85208	8.31481	5.82755	6.44853	7.13541	8.40949	6.70571	8.28395	6.65216	6.57922	6.84845	6.03787	7.75103	7.48063	6.41062	6.1359	4.61534	9.29192	5.27479	6.27578	5.75733	5.2937	5.76066	5.93992	6.95705	6.24223	7.5182	6.12258	6.13301	6.50292	6.25158	5.56963	6.41822	7.37613
HTA2-neg-47424233_st	12.13	5.25547	4.02316	3.08952	4.0971	5.09092	3.63419	3.05718	3.9191	3.27135	2.95753	4.24004	4.99849	3.36883	2.98592	6.3765	3.49248	5.14377	3.77016	4.03579	3.73135	4.10993	4.94509	5.09194	4.37594	4.6661	3.2299	5.33922	2.8649	3.88808	5.90421	3.46661	3.18251	3.13756	3.13319	3.1729	5.14952	3.39515	2.4774	3.95351	3.08907	4.01318	4.39048	2.63072	4.83939	2.79718	4.17343	3.53182	2.262
HTA2-neg-47424237_st	5.06321	2.9722	2.68663	3.14934	3.10935	3.78114	3.03781	3.76096	3.4036	3.00966	4.91256	4.3	3.25271	3.77016	3.05326	2.40705	3.44947	2.76115	5.54017	4.54788	4.09549	2.87823	3.18583	2.33207	3.48315	2.88486	3.69705	2.60767	4.29719	3.76703	4.47483	3.03744	3.74742	3.63676	2.08232	3.05319	2.74701	3.61037	3.81189	2.53022	3.56615	2.9961	3.50332	3.69548	3.28848	2.65066	4.1438	4.3458	2.86957
HTA2-neg-47424238_st	4.65973	3.15101	4.19646	4.84995	4.04823	4.30566	2.86051	3.21032	4.08519	4.10485	3.18852	4.17726	3.19069	3.47025	3.50521	6.48344	3.46807	5.08665	3.53244	5.40976	3.92162	3.85838	5.33774	3.31425	3.07425	4.66638	4.18464	3.3602	5.37079	3.73664	3.98356	2.82741	4.6786	2.55655	4.13756	3.56885	3.52491	3.38595	3.00548	3.82723	3.81575	4.55345	4.06997	3.30813	2.9551	4.55055	3.98999	4.61395	3.65577
HTA2-neg-47424240_st	4.30151	5.04876	4.84307	3.99939	4.56537	4.55406	3.81911	4.04969	4.76565	4.63612	3.64076	5.41474	5.23279	3.01089	4.31252	4.44016	4.90878	4.41994	4.99941	4.66418	3.7224	3.68439	4.88584	4.74813	4.47013	4.39873	5.01917	3.99281	5.48138	4.12441	4.40255	5.14039	4.36073	5.24029	4.38776	3.14271	4.5181	5.16493	4.26311	3.87531	4.7001	4.35033	4.31956	4.87989	5.28448	3.91089	4.26237	3.30562	5.56868
HTA2-neg-47424241_st	4.37381	3.63678	3.58198	5.38484	4.66615	5.39547	3.06958	3.74756	4.69665	4.17544	3.00121	3.37661	2.49994	3.59271	5.82899	2.84119	5.20402	3.15452	3.56062	3.99065	2.61628	3.68708	3.78133	2.53162	4.30511	4.83686	2.94198	3.24758	4.21237	2.82647	3.17922	5.68327	3.78853	3.68281	3.5585	3.0279	3.44497	4.15956	5.69722	3.09655	3.12752	5.19525	5.54447	6.22151	4.92554	5.74902	4.71188	2.98826	2.83919
HTA2-neg-47424255_st	7.60717	3.78203	4.04932	4.19622	3.89275	5.26606	5.68589	6.04831	4.86035	5.15523	5.01171	4.41737	4.68408	5.27912	4.32503	5.01405	4.24673	4.89534	5.31755	6.09655	4.72247	3.51375	5.43771	4.42757	4.90685	4.85465	5.75336	4.58907	6.29454	3.50091	5.51229	4.8962	4.96053	3.678	3.18391	2.92797	5.97591	3.61462	4.33439	3.98456	3.75798	4.87592	4.32975	4.74618	4.11655	3.06514	4.56937	4.89211	5.87363
HTA2-neg-47424278_st	4.28881	10.1416	2.49366	7.77881	7.87171	4.65932	7.06668	3.00323	11.45	11.6163	6.12038	5.91721	11.866	7.89219	8.66368	6.64401	8.9726	5.24395	7.51402	11.6941	7.63127	2.08171	8.98107	6.17496	5.55605	9.75096	7.48187	6.51479	7.27994	7.84945	7.35557	5.36268	10.4142	9.49382	10.8086	7.20268	10.8302	8.27938	8.97064	9.19867	8.9499	9.05061	9.58497	9.46687	9.11075	9.06742	9.84014	6.85383	10.1038
HTA2-neg-47424280_st	8.45137	8.05514	8.37078	10.5213	8.40486	8.51245	8.2127	8.2774	9.29014	10.0686	7.75205	8.43752	9.41341	7.16269	6.88063	7.3921	6.77665	8.10578	9.68847	10.6618	8.17176	7.77273	9.93784	6.7207	8.2797	10.5093	7.81896	10.7153	10.0535	6.73248	7.62692	6.59877	8.08503	6.7964	7.85441	7.21075	8.59224	7.25745	7.49658	7.53217	6.26042	8.02638	6.6501	6.91314	7.47121	7.57629	7.20667	7.79558	8.13614
HTA2-neg-47424282_st	9.82817	8.27029	9.3288	7.99907	8.00364	6.21231	7.81747	6.14309	9.14246	8.04291	6.2526	8.09103	9.07395	6.45516	7.60847	7.12738	8.09643	5.68576	10.8422	10.083	9.30472	9.63322	9.70677	7.2031	7.74194	9.26507	6.68368	8.42663	8.567	7.33696	9.33068	6.00593	7.10181	7.02976	6.42221	6.9144	6.60857	6.57669	8.2793	7.1869	4.99368	5.44607	7.56082	6.77181	7.43889	5.07589	7.17593	5.09704	9.75027
HTA2-neg-47424289_st	4.01273	4.63703	4.07429	4.90313	3.3399	4.51792	6.68189	4.41557	5.16729	5.6217	2.95164	3.28406	4.18702	5.20373	4.38271	3.98987	3.42904	3.62631	4.31659	4.48993	9.85718	3.23561	3.0047	3.24012	5.04006	4.36794	3.01458	5.28779	4.68826	3.13089	3.30448	5.43468	3.93936	5.14717	3.67241	3.75949	3.45979	4.51577	3.9221	5.79492	3.44899	5.38965	2.42465	5.69211	3.75677	4.07998	2.25606	4.25965	4.04767
HTA2-neg-47424307_st	5.55276	4.14252	3.55697	7.1293	3.71406	4.92756	3.88303	3.15975	4.53634	4.10148	2.52074	6.88115	3.49759	3.42325	6.30819	2.42676	9.53175	2.27974	4.874	4.05397	5.30669	3.25889	8.04803	6.70621	4.11873	5.11067	3.47303	5.72029	3.54171	4.17481	6.18166	4.18967	3.45429	6.24348	3.64062	4.05659	3.78398	2.86927	4.05718	5.56232	4.32907	4.12822	4.23659	2.12185	3.24936	6.16225	5.23924	2.68692	2.90304
HTA2-neg-47424309_st	7.02836	5.54626	9.44395	6.05735	4.84405	6.54505	5.21521	4.22489	6.07318	5.70314	5.80933	5.77543	5.30089	5.29935	4.67831	5.57805	7.45671	5.24395	4.82259	7.85442	4.65614	5.79463	5.42221	4.49976	5.1663	6.83297	5.99296	6.21987	5.52426	5.24865	3.91939	5.47825	3.93984	3.53498	6.31736	4.73217	4.48486	4.29366	4.05858	6.21418	4.00235	4.50002	4.23659	4.90628	4.11537	2.78383	3.97114	4.73035	5.52242
HTA2-neg-47424336_st	5.56111	4.81059	5.5601	4.21218	10.7932	5.75928	6.68096	5.57835	7.82901	5.67856	4.10985	6.37846	7.79093	5.37257	6.02681	6.14642	7.26657	6.61125	7.75405	10.4692	6.78927	8.38851	9.4227	5.56182	6.2437	6.41401	5.28966	6.58107	5.44153	8.02305	5.85396	6.86796	7.52071	5.09218	6.59165	5.34204	6.25595	6.57856	6.47227	5.44278	5.80054	5.44196	4.71073	5.76178	3.7132	5.3886	8.01547	5.02415	5.17119
HTA2-neg-47424337_st	6.9358	5.20885	6.06936	5.64833	5.49492	5.26872	4.89131	4.66993	6.003	5.41288	4.7761	6.03727	6.25852	4.45447	5.08406	5.4756	5.71411	5.65774	6.18268	6.16031	5.75722	5.96662	6.97784	5.2126	4.94745	6.43708	7.10008	5.34381	5.55911	5.06719	3.78619	3.1372	3.63909	2.91893	3.24418	3.8618	3.13752	4.29366	3.33856	3.91879	3.90212	3.53506	2.06003	2.95143	2.74455	4.66833	4.87928	3.84832	5.75838
HTA2-neg-47424342_st	5.89695	7.28781	5.32555	4.4703	4.11652	3.81392	4.84255	4.77431	6.76449	7.26344	5.09699	3.36345	5.53483	4.41764	3.26711	5.34312	5.7898	6.54302	7.31788	8.67374	6.59156	7.41494	5.74721	5.45136	5.30955	5.72152	4.52781	6.06269	6.74179	4.71628	5.46039	5.50889	5.67873	3.46702	7.11814	6.3238	6.90834	4.31174	4.22073	4.23547	3.98672	3.62614	4.21517	6.15348	4.89412	3.09753	3.44527	5.29205	5.24508
HTA2-neg-47424344_st	3.63519	4.14259	6.10112	3.77558	2.54042	4.24825	6.1624	4.09966	3.06877	3.92706	5.1239	3.34342	4.29472	3.24941	2.89769	3.08153	3.88971	2.92322	2.95194	3.16578	3.53292	4.8079	3.22685	4.39939	3.63549	3.97028	4.32819	4.08303	3.62663	3.3819	3.50496	5.62137	4.92885	3.50814	3.41573	2.6744	4.65236	3.71451	3.08735	3.39478	4.60952	2.92996	4.63224	3.34793	4.21259	3.93762	2.61388	3.34084	5.29002
HTA2-neg-47424348_st	6.96716	6.43271	8.4361	5.70857	5.85428	7.29388	5.34173	5.84038	5.09064	5.50151	4.91761	5.59578	5.57875	5.58148	6.01529	5.41871	4.37111	6.15581	6.73397	5.41125	5.08907	4.54641	5.76843	5.82941	5.92236	6.13864	4.08523	5.85148	5.23719	4.89121	5.15338	6.50365	4.72375	5.6647	3.80855	5.25739	3.99535	3.93683	5.28967	5.58591	5.58388	5.46531	4.00479	6.18203	4.82923	5.20922	6.55539	3.35904	4.48462
HTA2-neg-47424353_st	5.52358	5.90976	6.68178	7.9808	5.84451	6.58786	5.14629	5.03814	8.87771	7.71623	4.98283	5.78292	7.38096	5.14295	5.26206	5.77971	7.33502	5.48073	7.76675	8.2661	6.48803	6.22813	7.51088	5.17112	4.4759	8.61462	6.9486	7.03289	6.23687	5.75331	6.39601	5.94074	7.16684	7.12068	7.51066	5.94456	6.99704	5.98422	5.61194	6.95852	4.95099	5.2838	6.12446	4.92249	5.37797	4.00262	7.46875	5.47476	6.64498
HTA2-neg-47424354_st	4.44187	4.32361	7.79032	5.97385	6.58062	4.39287	5.36279	4.87452	7.63562	6.00122	6.39439	6.39918	6.52405	6.88826	7.66092	5.26137	5.6478	4.91751	7.99711	8.71705	6.79225	4.28966	5.75946	5.81788	4.69154	5.43006	10.4374	4.66796	8.88773	4.57953	4.27709	4.86643	5.31467	4.17977	6.06527	6.06841	7.33071	4.58119	4.70594	5.36592	7.78578	4.02518	5.0363	5.45828	5.7036	4.78043	9.44475	5.69154	4.66331
HTA2-neg-47424360_st	3.61635	5.84296	3.62346	7.34112	2.78819	4.26534	2.7188	2.79178	2.36157	6.17496	5.10175	7.48336	3.76683	2.23864	5.80569	7.06404	8.7724	3.68774	6.46257	4.30716	8.02422	3.98754	10.3302	5.2126	2.25258	6.05013	7.01136	7.48597	9.53966	5.15676	1.98469	3.62088	2.32094	5.50746	2.13502	3.34118	6.39261	6.26505	3.34176	6.27325	4.24022	4.35253	2.67008	4.56105	2.02643	5.38015	3.07737	2.24808	6.94824
HTA2-neg-47424374_st	8.46653	6.60042	6.51377	5.84935	7.12251	7.72126	5.63723	5.41323	8.31517	5.8017	7.8369	6.60878	7.0762	5.36409	6.00394	6.98306	7.94684	4.1181	7.01593	7.8103	5.52174	5.41162	7.18108	5.05442	5.4334	7.79666	6.11555	6.78392	7.23707	5.95464	6.8993	7.05112	8.15406	7.00882	6.24066	5.57509	6.19831	5.82555	4.40291	6.83734	6.36212	5.27925	7.6422	4.96072	5.30431	6.64192	6.23638	5.6725	6.2852
HTA2-neg-47424390_st	5.14552	10.1374	4.49733	8.32525	4.37267	8.4899	4.39427	5.56154	7.15725	6.56261	5.38897	6.79031	6.94534	6.1434	6.21387	6.97641	7.86989	4.67665	7.24641	8.42026	6.93564	4.21132	7.50612	5.44331	8.22419	3.46298	5.07865	5.81435	7.41656	2.95325	4.25637	4.27567	4.25391	5.61221	5.44717	7.05575	6.89474	6.3663	5.85887	7.6467	3.91705	5.00031	6.02304	3.9404	7.05263	4.40561	6.93984	6.53027	6.88534
HTA2-neg-47424420_st	4.0777	5.05838	4.79709	3.96269	6.26276	3.63804	3.34374	6.01626	3.74713	4.74299	4.85731	3.6727	7.83386	2.80139	3.86213	5.35399	5.6838	3.10448	3.49287	4.06279	5.44793	5.5015	3.51098	2.8453	5.34195	3.80763	2.41342	5.72029	5.15224	3.09136	3.35056	5.36268	3.84297	7.27121	5.47588	6.33291	4.32769	3.74398	5.30215	2.92144	4.31123	7.17128	5.09672	5.26774	3.55526	3.42797	4.91996	4.5218	5.02903
[truncated: 23,675 more rows]
[truncated: 41 more columns]
